# Supplementary material
Source: PubMed Central journal article supplement (PMC219476)
Supplement: nar_31_20_5877__1.pdf [file nar_31_20_5877__1.pdf]

# 1 Data

The data used to train and evaluate the LDA model described in this work are detailed below. In each case, we provide the transition probability data derived from the sequences. The 16 dinucleotide transition probabilities are listed immediately under a line describing the sequence by a unique identifier and information regarding the source of the sequence. The order of the transition probabilities is:

|    |    |    |    |    |    |    |    |
|----|----|----|----|----|----|----|----|
| AA | AC | AG | AT | CA | CC | CG | CT |
| GA | GC | GG | GT | TA | TC | TG | TT |

A note on the identifiers used for each sequence: where possible, we have used the GenBank accession number as the identifier. For example, the sequence marked as AC07862.6\_1 represents the BAC with GenBank accession number AC07862.6 and the \_1 indicates an ORF within that BAC. If an identifier is of the form AF031926\_1, then this indicates that it is the first entry in a GenBank record that contains multiple cds entries. GSS identifiers are drawn directly from dbGSS. Genomic contig ids are exactly those used by the Sanger Institute's sequence database. For ORFs drawn from Chromosomes I and II, the identifiers used by the Sanger Institute and The Institute for Genome Research (TIGR) were used without any modification.

## Training data

The training data used to train our linear discriminant model is listed below. For each of the 106 upstream sequences used, the GenBank accession number is provided along with the length of the sequence and whether the upstream region was determined by EST mapping or RT-PCR followed by sequencing (see Methods for more details).

### Non-coding regions - Training Set

AC007862.6\_1 Length=412 EST mapping  
0.24 0.18 0.16 0.42 0.25 0.20 0.19 0.36  
0.23 0.19 0.20 0.37 0.19 0.14 0.24 0.44

AC007862.6\_329 Length=391 sequenced from RT-PCR results  
0.31 0.20 0.17 0.31 0.31 0.20 0.21 0.28  
0.17 0.25 0.23 0.35 0.15 0.12 0.32 0.41

AC007863.14\_280 Length=216 sequenced from RT-PCR results  
0.15 0.30 0.24 0.30 0.19 0.28 0.28 0.25  
0.18 0.22 0.08 0.51 0.11 0.21 0.29 0.39

AC007866.10\_029 Length=161 sequenced from RT-PCR results  
0.25 0.16 0 0.58 0.44 0.20 0.04 0.32  
0.11 0.22 0 0.67 0.42 0.13 0.10 0.35

AC012647.17\_195 Length=312 sequenced from RT-PCR results  
0.13 0.30 0.13 0.44 0.33 0.18 0.17 0.32  
0.20 0.20 0.17 0.43 0.24 0.13 0.21 0.43

AC013485.2\_081 Length=107 sequenced from RT-PCR results  
0 0.38 0.15 0.46 0.14 0.31 0.14 0.41  
0.11 0.32 0.16 0.42 0.16 0.20 0.24 0.40

AC073906.5\_1 Length=401 EST mapping  
0.15 0.31 0.24 0.31 0.24 0.23 0.19 0.34  
0.11 0.29 0.18 0.41 0.13 0.18 0.29 0.40

AC084046.11\_1 Length=401 EST mapping  
0.36 0.28 0.10 0.25 0.26 0.30 0.16 0.28  
0.25 0.20 0.25 0.31 0.12 0.21 0.29 0.37

AC087327.6\_1 Length=400 EST mapping  
0.26 0.21 0.23 0.30 0.24 0.32 0.14 0.30  
0.24 0.19 0.17 0.40 0.19 0.23 0.23 0.35

AC091526.5\_1 Length=406 EST mapping  
0.28 0.22 0.26 0.24 0.21 0.29 0.24 0.26  
0.25 0.18 0.31 0.25 0.17 0.22 0.31 0.30

AC091701.2\_137 Length=122 sequenced from RT-PCR results  
0.17 0.39 0.06 0.39 0.20 0.37 0.12 0.32  
0.12 0.35 0.18 0.35 0.11 0.29 0.20 0.40  
AC091701.2\_185 Length=178 sequenced from RT-PCR results  
0.26 0.26 0.26 0.21 0.21 0.21 0.29 0.29  
0.22 0.34 0.15 0.29 0.25 0.15 0.23 0.37  
AC092736.2\_1 Length=406 EST mapping  
0.31 0.16 0.17 0.36 0.36 0.11 0.11 0.42  
0.33 0.14 0.20 0.33 0.18 0.19 0.30 0.33  
AC093543.2\_1 Length=401 EST mapping  
0.36 0.18 0.19 0.27 0.26 0.23 0.12 0.38  
0.26 0.21 0.16 0.36 0.16 0.20 0.28 0.36  
AC103580.3\_1 Length=405 EST mapping  
0.28 0.22 0.25 0.25 0.22 0.23 0.24 0.30  
0.16 0.21 0.29 0.34 0.15 0.20 0.29 0.36  
AF008186 Length=334 sequenced from RT-PCR results  
0.35 0.27 0.14 0.24 0.39 0.21 0.18 0.22  
0.25 0.18 0.20 0.38 0.17 0.19 0.23 0.41  
AF011787 Length=390 sequenced from RT-PCR results  
0.25 0.27 0.22 0.26 0.29 0.20 0.13 0.38  
0.24 0.24 0.23 0.28 0.11 0.19 0.27 0.43  
AF020696 Length=344 sequenced from RT-PCR results  
0.25 0.25 0.23 0.27 0.20 0.26 0.25 0.29  
0.22 0.33 0.24 0.21 0.19 0.17 0.28 0.35  
AF027739 Length=240 sequenced from RT-PCR results  
0.26 0.26 0.20 0.28 0.13 0.11 0.19 0.57  
0.11 0.33 0.13 0.42 0.23 0.15 0.22 0.41  
AF028726\_0 Length=655 EST mapping  
0.27 0.25 0.22 0.27 0.28 0.25 0.24 0.23  
0.24 0.22 0.25 0.29 0.12 0.22 0.29 0.37  
AF031926\_1 Length=248 sequenced from RT-PCR results  
0.18 0.33 0.12 0.36 0.20 0.23 0.14 0.43  
0.15 0.26 0.19 0.40 0.08 0.18 0.24 0.50  
AF031926\_2 Length=385 sequenced from RT-PCR results  
0.25 0.10 0.27 0.38 0.20 0.05 0.15 0.60  
0.18 0.19 0.19 0.43 0.18 0.08 0.22 0.52  
AF078916 Length=245 sequenced from RT-PCR results  
0.32 0.21 0.27 0.21 0.28 0.26 0.12 0.35  
0.24 0.13 0.27 0.36 0.22 0.13 0.23 0.42

AF079110 Length=278 sequenced from RT-PCR results  
 0.39 0.21 0.13 0.26 0.26 0.17 0.14 0.44  
 0.17 0.22 0.30 0.31 0.11 0.31 0.22 0.35  
 AF095907\_1 Length=426 EST mapping  
 0.23 0.20 0.21 0.37 0.18 0.40 0.16 0.26  
 0.16 0.19 0.24 0.41 0.14 0.17 0.22 0.46  
 AF095907\_2 Length=509 EST mapping  
 0.29 0.19 0.23 0.30 0.20 0.38 0.16 0.27  
 0.19 0.19 0.22 0.40 0.15 0.17 0.22 0.46  
 AF119091 Length=199 sequenced from RT-PCR results  
 0.33 0.16 0.19 0.32 0.38 0.23 0.05 0.35  
 0.45 0.16 0.16 0.23 0.13 0.24 0.20 0.43  
 AF164200\_2 Length=376 EST mapping  
 0.30 0.20 0.26 0.24 0.22 0.26 0.24 0.28  
 0.28 0.18 0.29 0.25 0.11 0.26 0.24 0.39  
 AF301417\_3 Length=107 EST mapping  
 0.30 0.15 0.21 0.33 0.38 0.19 0.25 0.19  
 0.32 0.11 0.26 0.32 0.26 0.16 0.08 0.50  
 AJ005114 Length=178 sequenced from RT-PCR results  
 0.24 0.24 0.06 0.47 0.20 0.38 0.14 0.29  
 0.19 0.31 0.12 0.38 0.16 0.31 0.21 0.31  
 AL493679\_1 Length=414 EST mapping  
 0.29 0.23 0.25 0.23 0.32 0.33 0.13 0.22  
 0.27 0.25 0.25 0.22 0.15 0.18 0.25 0.41  
 ALLTRYP-1C06.Q1C Length=265 EST mapping  
 0.22 0.22 0.24 0.31 0.23 0.19 0.24 0.34  
 0.10 0.38 0.28 0.25 0.16 0.17 0.20 0.48  
 AY046888 Length=1789 EST mapping  
 0.28 0.19 0.17 0.36 0.37 0.15 0.13 0.35  
 0.32 0.16 0.12 0.39 0.26 0.12 0.20 0.41  
 AY046919\_1 Length=504 EST mapping  
 0.41 0.20 0.15 0.24 0.27 0.20 0.15 0.38  
 0.20 0.30 0.16 0.33 0.20 0.22 0.26 0.32  
 J04214 Length=181 sequenced from RT-PCR results  
 0.28 0.20 0.28 0.24 0.10 0.21 0.24 0.45  
 0.11 0.11 0.18 0.60 0.12 0.15 0.30 0.43  
 J04841 Length=357 sequenced from RT-PCR results  
 0.36 0.22 0.23 0.19 0.21 0.29 0.23 0.27  
 0.24 0.14 0.26 0.36 0.21 0.19 0.23 0.37

L10721 Length=187 sequenced from RT-PCR results  
 0.24 0.27 0.15 0.33 0.21 0.36 0.12 0.31  
 0.10 0.27 0.20 0.43 0.15 0.31 0.20 0.34  
 M20570 Length=139 sequenced from RT-PCR results  
 0.24 0.20 0.16 0.40 0.23 0.32 0.16 0.29  
 0.11 0.15 0.19 0.56 0.15 0.22 0.25 0.38  
 M33129\_1 Length=1037 EST mapping  
 0.28 0.17 0.27 0.28 0.25 0.26 0.23 0.26  
 0.18 0.22 0.29 0.31 0.13 0.21 0.32 0.34  
 M33129\_2 Length=903 EST mapping  
 0.28 0.10 0.24 0.38 0.20 0.28 0.18 0.34  
 0.22 0.26 0.23 0.29 0.15 0.17 0.25 0.43  
 M33130\_1 Length=1044 EST mapping  
 0.30 0.18 0.27 0.25 0.26 0.30 0.23 0.21  
 0.19 0.24 0.26 0.31 0.13 0.24 0.29 0.34  
 M36124 Length=210 sequenced from RT-PCR results  
 0.26 0.14 0.23 0.37 0.20 0.30 0.23 0.28  
 0.26 0.17 0.30 0.26 0.15 0.16 0.17 0.51  
 TRYP10.0.000001 Length=400 EST mapping  
 0.31 0.22 0.24 0.24 0.25 0.24 0.29 0.23  
 0.26 0.21 0.25 0.27 0.24 0.18 0.23 0.35  
 TRYP10.0.000011 Length=400 EST mapping  
 0.21 0.19 0.11 0.50 0.28 0.22 0.21 0.29  
 0.28 0.12 0.14 0.46 0.26 0.15 0.24 0.35  
 TRYP10.0.000012 Length=400 EST mapping  
 0.19 0.29 0.29 0.22 0.28 0.26 0.20 0.27  
 0.19 0.23 0.23 0.35 0.10 0.20 0.24 0.46  
 TRYP10.0.000015 Length=400 EST mapping  
 0.28 0.20 0.22 0.31 0.30 0.25 0.15 0.31  
 0.22 0.22 0.30 0.26 0.20 0.22 0.37 0.20  
 TRYP10.0.000026 Length=400 EST mapping  
 0.33 0.25 0.17 0.26 0.27 0.19 0.22 0.32  
 0.18 0.26 0.24 0.33 0.23 0.13 0.37 0.27  
 TRYP10.0.000030\_1 Length=400 EST mapping  
 0.20 0.27 0.17 0.37 0.23 0.20 0.21 0.36  
 0.18 0.28 0.23 0.31 0.13 0.19 0.28 0.39  
 TRYP10.0.000030\_2 Length=370 EST mapping  
 0.15 0.28 0.15 0.42 0.21 0.20 0.20 0.38  
 0.18 0.26 0.23 0.33 0.13 0.20 0.28 0.40

TRYP10.0.000033 Length=400 EST mapping  
 0.34 0.21 0.16 0.29 0.23 0.33 0.17 0.28  
 0.36 0.12 0.16 0.36 0.24 0.16 0.30 0.30  
 TRYP10.0.000036 Length=400 EST mapping  
 0.32 0.21 0.22 0.24 0.25 0.31 0.28 0.16  
 0.23 0.27 0.27 0.23 0.18 0.32 0.18 0.32  
 TRYP10.0.000037 Length=400 EST mapping  
 0.45 0.23 0.12 0.20 0.41 0.16 0.20 0.23  
 0.27 0.17 0.27 0.29 0.31 0.23 0.14 0.31  
 TRYP10.0.000041 Length=401 EST mapping  
 0.38 0.15 0.22 0.25 0.27 0.27 0.07 0.39  
 0.25 0.09 0.39 0.27 0.11 0.17 0.10 0.62  
 TRYP10.0.000313 Length=400 EST mapping  
 0.25 0.28 0.09 0.39 0.29 0.25 0.17 0.28  
 0.19 0.28 0.19 0.34 0.29 0.23 0.16 0.32  
 TRYP10.0.000508 Length=400 EST mapping  
 0.28 0.20 0.28 0.24 0.21 0.31 0.19 0.28  
 0.25 0.24 0.20 0.31 0.12 0.27 0.23 0.38  
 TRYP10.0.001820 Length=400 EST mapping  
 0.17 0.31 0.23 0.28 0.24 0.24 0.19 0.33  
 0.23 0.17 0.22 0.38 0.21 0.27 0.31 0.21  
 TRYP10.0.003695 Length=400 EST mapping  
 0.28 0.21 0.23 0.28 0.27 0.28 0.24 0.21  
 0.24 0.20 0.26 0.29 0.21 0.18 0.25 0.36  
 TRYP10.0.003781 Length=400 EST mapping  
 0.22 0.28 0.22 0.28 0.19 0.28 0.18 0.36  
 0.21 0.22 0.25 0.32 0.17 0.21 0.21 0.41  
 TRYP10.0.003801 Length=400 EST mapping  
 0.17 0.30 0.21 0.32 0.23 0.19 0.26 0.33  
 0.08 0.37 0.14 0.41 0.09 0.19 0.42 0.31  
 TRYP9.0.000625 Length=400 EST mapping  
 0.31 0.22 0.13 0.34 0.33 0.19 0.19 0.30  
 0.25 0.13 0.28 0.34 0.22 0.12 0.19 0.47  
 TRYP9.0.000728 Length=400 EST mapping  
 0.27 0.24 0.30 0.19 0.36 0.25 0.15 0.24  
 0.24 0.25 0.28 0.23 0.12 0.22 0.24 0.42  
 TRYP9.0.000821 Length=209 EST mapping  
 0.36 0.20 0.16 0.29 0.19 0.19 0.30 0.32  
 0.23 0.13 0.05 0.59 0.14 0.18 0.23 0.45

TRYP9.0.000826 Length=400 EST mapping  
 0.35 0.16 0.22 0.27 0.23 0.30 0.14 0.33  
 0.31 0.21 0.17 0.30 0.17 0.27 0.17 0.39  
 TRYP9.0.000828 Length=400 EST mapping  
 0.31 0.25 0.24 0.20 0.25 0.24 0.17 0.35  
 0.27 0.26 0.20 0.27 0.13 0.27 0.16 0.44  
 TRYP9.0.000836 Length=400 EST mapping  
 0.32 0.20 0.18 0.31 0.28 0.24 0.15 0.33  
 0.27 0.14 0.25 0.34 0.14 0.22 0.32 0.33  
 TRYP9.0.000848 Length=400 EST mapping  
 0.24 0.24 0.14 0.37 0.26 0.22 0.18 0.34  
 0.20 0.21 0.20 0.40 0.09 0.23 0.32 0.36  
 TRYP9.0.000919 Length=400 EST mapping  
 0.31 0.23 0.22 0.24 0.17 0.27 0.23 0.32  
 0.22 0.23 0.23 0.32 0.13 0.25 0.26 0.36  
 TRYP9.0.001023 Length=400 EST mapping  
 0.23 0.31 0.22 0.23 0.22 0.28 0.18 0.31  
 0.18 0.32 0.23 0.27 0.19 0.20 0.25 0.35  
 TRYP9.0.001024 Length=400 EST mapping  
 0.14 0.30 0.24 0.32 0.22 0.29 0.25 0.25  
 0.25 0.30 0.26 0.19 0.15 0.22 0.23 0.40  
 TRYP9.0.002687 Length=400 EST mapping  
 0.28 0.21 0.21 0.30 0.18 0.26 0.16 0.40  
 0.19 0.20 0.30 0.31 0.15 0.17 0.27 0.41  
 TRYP9.0.003000 Length=400 EST mapping  
 0.14 0.43 0.11 0.33 0.32 0.25 0.17 0.25  
 0.28 0.21 0.17 0.35 0.21 0.26 0.26 0.27  
 TRYP9.0.003024 Length=400 EST mapping  
 0.31 0.32 0.19 0.17 0.30 0.21 0.20 0.29  
 0.20 0.22 0.28 0.31 0.27 0.18 0.21 0.34  
 U10562 Length=323 sequenced from RT-PCR results  
 0.47 0.17 0.16 0.21 0.47 0.17 0.12 0.24  
 0.44 0.24 0.07 0.24 0.45 0.19 0.11 0.26  
 U20092\_2 Length=153 EST mapping  
 0.05 0.33 0.14 0.48 0.10 0.29 0.19 0.43  
 0.27 0.18 0.14 0.41 0.15 0.30 0.10 0.45  
 U20092 Length=132 sequenced from RT-PCR results  
 0.06 0.33 0.11 0.50 0.11 0.30 0.14 0.46  
 0.31 0.12 0.19 0.38 0.13 0.30 0.10 0.47

U26666 Length=137 sequenced from RT-PCR results  
 0.09 0.39 0.09 0.43 0.24 0.27 0.05 0.43  
 0.06 0.17 0.11 0.67 0.19 0.26 0.22 0.33  
 U28866 Length=223 sequenced from RT-PCR results  
 0.26 0.19 0.16 0.40 0.17 0.23 0.19 0.42  
 0.19 0.28 0.09 0.44 0.18 0.20 0.13 0.48  
 U29199 Length=145 sequenced from RT-PCR results  
 0.20 0.20 0.35 0.25 0.16 0.29 0.16 0.39  
 0.14 0.27 0.24 0.35 0.11 0.14 0.29 0.46  
 U43702 Length=255 sequenced from RT-PCR results  
 0.17 0.17 0.15 0.51 0.17 0.33 0.10 0.39  
 0.17 0.28 0.17 0.38 0.13 0.27 0.20 0.39  
 U52964 Length=281 sequenced from RT-PCR results  
 0.31 0.24 0.19 0.25 0.21 0.36 0.11 0.32  
 0.22 0.35 0.17 0.26 0.22 0.18 0.19 0.41  
 X05889\_1 Length=172 EST mapping  
 0.33 0.28 0.15 0.23 0.28 0.19 0.28 0.25  
 0.11 0.17 0.17 0.56 0.20 0.14 0.23 0.42  
 X05889\_2 Length=24 EST mapping  
 0 0.67 0.33 0 0 0 0 1.00  
 0 0 0 1.00 0.20 0.07 0.07 0.67  
 X05889\_3 Length=216 EST mapping  
 0.32 0.17 0.23 0.28 0.24 0.26 0.18 0.32  
 0.27 0.11 0.14 0.49 0.14 0.18 0.15 0.53  
 X05889\_4 Length=276 EST mapping  
 0.15 0.23 0.13 0.48 0.29 0.05 0.18 0.47  
 0.14 0.14 0.27 0.45 0.19 0.13 0.16 0.51  
 X52584\_1 Length=1086 EST mapping  
 0.28 0.17 0.26 0.28 0.25 0.25 0.24 0.26  
 0.18 0.22 0.29 0.30 0.13 0.21 0.31 0.34  
 X52584\_2 Length=904 EST mapping  
 0.28 0.10 0.24 0.38 0.20 0.28 0.18 0.34  
 0.23 0.26 0.23 0.29 0.15 0.17 0.25 0.43  
 X99951\_1 Length=283 EST mapping  
 0.34 0.21 0.21 0.24 0.22 0.33 0.16 0.28  
 0.29 0.19 0.27 0.24 0.17 0.22 0.23 0.38  
 X99951\_2 Length=1154 EST mapping  
 0.22 0.22 0.23 0.33 0.27 0.26 0.19 0.28  
 0.21 0.22 0.21 0.35 0.19 0.19 0.23 0.38



Z54339.1 Length=145 EST mapping  
0.28 0.38 0.06 0.28 0.13 0.28 0.10 0.49  
0.26 0.26 0.11 0.37 0.22 0.22 0.20 0.35

Z54340.1 Length=237 EST mapping  
0.18 0.41 0.16 0.25 0.27 0.27 0.23 0.23  
0.22 0.10 0.21 0.47 0.12 0.13 0.33 0.43

Z96795.2 Length=126 EST mapping  
0.43 0.11 0.35 0.11 0.32 0 0.32 0.37  
0.34 0.20 0.31 0.14 0.28 0.28 0.12 0.32

gi.11845510\_emb\_AL479829\_1\_TA209F02P Length=311 EST mapping  
0.17 0.28 0.22 0.33 0.24 0.18 0.24 0.34  
0.08 0.44 0.13 0.35 0.13 0.20 0.37 0.30

gi.11846531\_emb\_AL480762\_1\_TA223D06Q Length=219 EST mapping  
0.23 0.38 0.26 0.13 0.23 0.14 0.44 0.19  
0.17 0.30 0.29 0.24 0.25 0.23 0.27 0.25

gi.11847700\_emb\_AL481105\_1\_TA243F09Q Length=144 EST mapping  
0.12 0.35 0.24 0.29 0.16 0.26 0.21 0.37  
0.12 0.27 0.15 0.46 0.10 0.24 0.16 0.50

gi.11853678\_emb\_AL486758\_1\_TA286B10Q Length=197 EST mapping  
0.47 0.11 0.16 0.25 0.41 0.17 0.07 0.34  
0.43 0.18 0.14 0.25 0.32 0.17 0.15 0.36

gi.11855065\_emb\_AL454261\_1\_TA35D08Q Length=200 EST mapping  
0.23 0.17 0.15 0.45 0.13 0.38 0.15 0.34  
0.29 0.12 0.12 0.47 0.19 0.22 0.23 0.36

gi.11855698\_emb\_AL455512\_1\_TA41G03Q Length=132 EST mapping  
0.29 0.32 0.03 0.35 0.30 0.30 0.07 0.33  
0.08 0.25 0.08 0.58 0.22 0.14 0.14 0.50

gi.11856123\_emb\_AL453946\_1\_TA45C06P Length=332 EST mapping  
0.29 0.27 0.18 0.26 0.20 0.30 0.24 0.26  
0.17 0.28 0.17 0.37 0.16 0.24 0.29 0.31

gi.11859126\_emb\_AL458502\_1\_TA69F07Q Length=158 EST mapping  
0.12 0.33 0.21 0.33 0.12 0.33 0.27 0.27  
0.20 0.27 0.13 0.40 0.16 0.27 0.16 0.40

gi.11868795\_emb\_AL492612\_1\_TA339F07Q Length=430 EST mapping  
0.31 0.17 0.19 0.34 0.31 0.24 0.21 0.24  
0.28 0.21 0.16 0.35 0.16 0.16 0.20 0.48

gi.11872246\_emb\_AL496323\_1\_TA372G07Q Length=131 EST mapping  
0.15 0.25 0.15 0.45 0.15 0.44 0.17 0.24  
0.14 0.19 0.19 0.48 0.17 0.29 0.15 0.40

gi.8429457.gb\_AZ212557.1\_AZ212557 Length=113 EST mapping  
 0.26 0.21 0.26 0.26 0.22 0.25 0.16 0.38  
 0.08 0.46 0.25 0.21 0.14 0.24 0.22 0.41  
 gi.8431613.gb\_AZ213813.1\_AZ213813 Length=337 EST mapping  
 0.31 0.18 0.24 0.27 0.15 0.29 0.22 0.33  
 0.27 0.15 0.33 0.26 0.18 0.24 0.19 0.40  
 gi.8434002.gb\_AZ216202.1\_AZ216202 Length=157 EST mapping  
 0.16 0.40 0.08 0.36 0.16 0.28 0.19 0.37  
 0.18 0.32 0.09 0.41 0.15 0.21 0.15 0.48  
 gi.8434902.gb\_AZ217102.1\_AZ217102 Length=213 EST mapping  
 0.25 0.31 0.14 0.31 0.15 0.32 0.18 0.35  
 0.19 0.26 0.07 0.48 0.15 0.26 0.11 0.47  
 gi.8436463.gb\_AZ218663.1\_AZ218663 Length=435 EST mapping  
 0.38 0.11 0.23 0.28 0.22 0.27 0.21 0.30  
 0.23 0.25 0.28 0.25 0.12 0.26 0.22 0.41

### Coding regions - Training Set

|            |      |      |      |      |      |      |      |      |
|------------|------|------|------|------|------|------|------|------|
| AF008186   | 0.23 | 0.29 | 0.24 | 0.23 | 0.25 | 0.28 | 0.25 | 0.21 |
|            | 0.21 | 0.33 | 0.24 | 0.22 | 0.10 | 0.34 | 0.34 | 0.21 |
| AF009711_1 | 0.22 | 0.27 | 0.21 | 0.30 | 0.23 | 0.24 | 0.31 | 0.21 |
|            | 0.31 | 0.23 | 0.21 | 0.25 | 0.20 | 0.28 | 0.30 | 0.22 |
| AF011787   | 0.26 | 0.26 | 0.30 | 0.18 | 0.19 | 0.24 | 0.41 | 0.16 |
|            | 0.26 | 0.41 | 0.14 | 0.18 | 0.15 | 0.23 | 0.37 | 0.25 |
| AF012853_1 | 0.32 | 0.19 | 0.34 | 0.16 | 0.32 | 0.15 | 0.31 | 0.21 |
|            | 0.36 | 0.27 | 0.21 | 0.16 | 0.19 | 0.24 | 0.34 | 0.24 |
| AF020696   | 0.38 | 0.19 | 0.29 | 0.13 | 0.24 | 0.28 | 0.25 | 0.22 |
|            | 0.28 | 0.33 | 0.22 | 0.18 | 0.12 | 0.30 | 0.37 | 0.21 |
| AF027739   | 0.30 | 0.24 | 0.24 | 0.22 | 0.26 | 0.21 | 0.26 | 0.27 |
|            | 0.23 | 0.20 | 0.26 | 0.32 | 0.14 | 0.24 | 0.36 | 0.27 |
| AF028726_1 | 0.34 | 0.17 | 0.34 | 0.16 | 0.31 | 0.25 | 0.24 | 0.20 |
|            | 0.47 | 0.33 | 0.12 | 0.08 | 0.07 | 0.31 | 0.38 | 0.24 |
| AF031926_1 | 0.32 | 0.15 | 0.35 | 0.18 | 0.29 | 0.14 | 0.36 | 0.21 |
|            | 0.26 | 0.19 | 0.26 | 0.29 | 0.16 | 0.18 | 0.38 | 0.28 |
| AF031926_2 | 0.30 | 0.20 | 0.28 | 0.22 | 0.23 | 0.18 | 0.33 | 0.25 |
|            | 0.26 | 0.21 | 0.31 | 0.23 | 0.14 | 0.20 | 0.35 | 0.31 |
| AF042190   | 0.28 | 0.29 | 0.24 | 0.19 | 0.24 | 0.32 | 0.26 | 0.19 |
|            | 0.26 | 0.30 | 0.24 | 0.20 | 0.13 | 0.27 | 0.40 | 0.21 |
| AF047722_1 | 0.30 | 0.23 | 0.21 | 0.26 | 0.29 | 0.26 | 0.28 | 0.18 |
|            | 0.25 | 0.31 | 0.25 | 0.19 | 0.15 | 0.25 | 0.37 | 0.24 |
| AF048689_1 | 0.27 | 0.23 | 0.27 | 0.24 | 0.25 | 0.23 | 0.28 | 0.23 |
|            | 0.26 | 0.25 | 0.28 | 0.21 | 0.15 | 0.24 | 0.36 | 0.25 |
| AF049902_1 | 0.25 | 0.37 | 0.18 | 0.20 | 0.23 | 0.27 | 0.24 | 0.26 |
|            | 0.22 | 0.23 | 0.30 | 0.25 | 0.09 | 0.32 | 0.39 | 0.20 |

|            |      |      |      |      |      |      |      |  |
|------------|------|------|------|------|------|------|------|--|
| AF074867_1 |      |      |      |      |      |      |      |  |
| 0.23       | 0.28 | 0.23 | 0.27 | 0.28 | 0.21 | 0.25 | 0.26 |  |
| 0.25       | 0.25 | 0.24 | 0.27 | 0.18 | 0.19 | 0.40 | 0.23 |  |
| AF078916   |      |      |      |      |      |      |      |  |
| 0.25       | 0.29 | 0.22 | 0.24 | 0.26 | 0.23 | 0.30 | 0.20 |  |
| 0.26       | 0.23 | 0.28 | 0.22 | 0.17 | 0.20 | 0.37 | 0.27 |  |
| AF079110   |      |      |      |      |      |      |      |  |
| 0.29       | 0.24 | 0.22 | 0.25 | 0.20 | 0.29 | 0.29 | 0.21 |  |
| 0.19       | 0.29 | 0.24 | 0.27 | 0.11 | 0.29 | 0.37 | 0.23 |  |
| AF095907_1 |      |      |      |      |      |      |      |  |
| 0.26       | 0.27 | 0.25 | 0.23 | 0.31 | 0.21 | 0.25 | 0.23 |  |
| 0.27       | 0.27 | 0.21 | 0.24 | 0.13 | 0.27 | 0.30 | 0.31 |  |
| AF102869   |      |      |      |      |      |      |      |  |
| 0.26       | 0.29 | 0.25 | 0.20 | 0.28 | 0.22 | 0.26 | 0.25 |  |
| 0.24       | 0.24 | 0.27 | 0.24 | 0.14 | 0.25 | 0.30 | 0.31 |  |
| AF119091   |      |      |      |      |      |      |      |  |
| 0.31       | 0.24 | 0.21 | 0.24 | 0.32 | 0.25 | 0.23 | 0.20 |  |
| 0.29       | 0.22 | 0.27 | 0.22 | 0.15 | 0.19 | 0.37 | 0.29 |  |
| AF152173_1 |      |      |      |      |      |      |      |  |
| 0.31       | 0.24 | 0.25 | 0.20 | 0.29 | 0.24 | 0.22 | 0.25 |  |
| 0.25       | 0.27 | 0.25 | 0.23 | 0.14 | 0.27 | 0.32 | 0.27 |  |
| AF152174_1 |      |      |      |      |      |      |      |  |
| 0.26       | 0.25 | 0.33 | 0.17 | 0.26 | 0.17 | 0.34 | 0.24 |  |
| 0.31       | 0.25 | 0.25 | 0.19 | 0.16 | 0.23 | 0.37 | 0.24 |  |
| AF164200_1 |      |      |      |      |      |      |      |  |
| 0.25       | 0.25 | 0.26 | 0.25 | 0.29 | 0.20 | 0.27 | 0.25 |  |
| 0.26       | 0.23 | 0.27 | 0.24 | 0.18 | 0.19 | 0.33 | 0.31 |  |
| AF164200_2 |      |      |      |      |      |      |      |  |
| 0.35       | 0.22 | 0.25 | 0.19 | 0.26 | 0.25 | 0.27 | 0.22 |  |
| 0.17       | 0.30 | 0.29 | 0.24 | 0.11 | 0.31 | 0.35 | 0.23 |  |
| AF168719_1 |      |      |      |      |      |      |      |  |
| 0.30       | 0.20 | 0.28 | 0.22 | 0.23 | 0.26 | 0.30 | 0.21 |  |
| 0.23       | 0.19 | 0.32 | 0.25 | 0.19 | 0.21 | 0.38 | 0.22 |  |
| AF169651_1 |      |      |      |      |      |      |      |  |
| 0.25       | 0.22 | 0.26 | 0.26 | 0.26 | 0.23 | 0.28 | 0.22 |  |
| 0.22       | 0.27 | 0.26 | 0.25 | 0.14 | 0.22 | 0.39 | 0.25 |  |
| AF169652_1 |      |      |      |      |      |      |      |  |
| 0.33       | 0.20 | 0.29 | 0.19 | 0.30 | 0.14 | 0.35 | 0.21 |  |
| 0.26       | 0.29 | 0.23 | 0.22 | 0.13 | 0.21 | 0.38 | 0.28 |  |
| AF169653_1 |      |      |      |      |      |      |      |  |
| 0.28       | 0.25 | 0.24 | 0.22 | 0.25 | 0.18 | 0.26 | 0.30 |  |
| 0.22       | 0.27 | 0.30 | 0.21 | 0.15 | 0.27 | 0.34 | 0.24 |  |

|            |      |      |      |      |      |      |      |
|------------|------|------|------|------|------|------|------|
| AF174136_1 |      |      |      |      |      |      |      |
| 0.28       | 0.24 | 0.26 | 0.22 | 0.32 | 0.19 | 0.25 | 0.23 |
| 0.25       | 0.25 | 0.26 | 0.24 | 0.15 | 0.21 | 0.37 | 0.27 |
| AF179372_1 |      |      |      |      |      |      |      |
| 0.28       | 0.26 | 0.21 | 0.25 | 0.31 | 0.23 | 0.25 | 0.21 |
| 0.25       | 0.26 | 0.25 | 0.24 | 0.18 | 0.20 | 0.31 | 0.31 |
| AF181287_1 |      |      |      |      |      |      |      |
| 0.29       | 0.25 | 0.24 | 0.22 | 0.26 | 0.19 | 0.28 | 0.27 |
| 0.26       | 0.20 | 0.30 | 0.24 | 0.16 | 0.20 | 0.40 | 0.24 |
| AF208112_1 |      |      |      |      |      |      |      |
| 0.27       | 0.25 | 0.26 | 0.22 | 0.29 | 0.21 | 0.23 | 0.26 |
| 0.27       | 0.20 | 0.32 | 0.22 | 0.17 | 0.19 | 0.36 | 0.28 |
| AF208112_2 |      |      |      |      |      |      |      |
| 0.27       | 0.28 | 0.23 | 0.22 | 0.32 | 0.21 | 0.26 | 0.21 |
| 0.28       | 0.22 | 0.26 | 0.24 | 0.15 | 0.24 | 0.35 | 0.26 |
| AF208112_3 |      |      |      |      |      |      |      |
| 0.25       | 0.26 | 0.26 | 0.23 | 0.27 | 0.24 | 0.25 | 0.24 |
| 0.27       | 0.23 | 0.27 | 0.23 | 0.14 | 0.21 | 0.38 | 0.26 |
| AF227501_1 |      |      |      |      |      |      |      |
| 0.32       | 0.25 | 0.21 | 0.21 | 0.31 | 0.23 | 0.27 | 0.19 |
| 0.27       | 0.23 | 0.25 | 0.25 | 0.16 | 0.19 | 0.35 | 0.30 |
| AF234189_1 |      |      |      |      |      |      |      |
| 0.26       | 0.23 | 0.24 | 0.27 | 0.31 | 0.20 | 0.28 | 0.21 |
| 0.30       | 0.21 | 0.22 | 0.27 | 0.18 | 0.20 | 0.33 | 0.29 |
| AF246237_1 |      |      |      |      |      |      |      |
| 0.41       | 0.16 | 0.30 | 0.13 | 0.25 | 0.22 | 0.32 | 0.20 |
| 0.27       | 0.21 | 0.27 | 0.25 | 0.19 | 0.28 | 0.35 | 0.19 |
| AF253418_1 |      |      |      |      |      |      |      |
| 0.29       | 0.23 | 0.26 | 0.22 | 0.26 | 0.21 | 0.27 | 0.25 |
| 0.31       | 0.15 | 0.28 | 0.25 | 0.20 | 0.22 | 0.27 | 0.31 |
| AF253418_2 |      |      |      |      |      |      |      |
| 0.33       | 0.21 | 0.22 | 0.24 | 0.28 | 0.18 | 0.28 | 0.26 |
| 0.31       | 0.24 | 0.25 | 0.21 | 0.21 | 0.20 | 0.29 | 0.30 |
| AF263280_1 |      |      |      |      |      |      |      |
| 0.26       | 0.24 | 0.22 | 0.27 | 0.29 | 0.19 | 0.22 | 0.30 |
| 0.32       | 0.21 | 0.20 | 0.28 | 0.16 | 0.20 | 0.36 | 0.29 |
| AF263280_2 |      |      |      |      |      |      |      |
| 0.30       | 0.19 | 0.27 | 0.25 | 0.22 | 0.26 | 0.29 | 0.22 |
| 0.30       | 0.31 | 0.25 | 0.14 | 0.18 | 0.28 | 0.32 | 0.23 |
| AF290945_1 |      |      |      |      |      |      |      |
| 0.28       | 0.21 | 0.20 | 0.31 | 0.28 | 0.21 | 0.23 | 0.28 |
| 0.29       | 0.21 | 0.27 | 0.23 | 0.18 | 0.16 | 0.36 | 0.30 |

|            |      |      |      |      |      |      |      |
|------------|------|------|------|------|------|------|------|
| AF301417_1 |      |      |      |      |      |      |      |
| 0.32       | 0.16 | 0.33 | 0.19 | 0.27 | 0.15 | 0.32 | 0.27 |
| 0.31       | 0.17 | 0.35 | 0.17 | 0.19 | 0.16 | 0.34 | 0.30 |
| AF301417_2 |      |      |      |      |      |      |      |
| 0.34       | 0.22 | 0.25 | 0.18 | 0.34 | 0.14 | 0.29 | 0.23 |
| 0.30       | 0.18 | 0.34 | 0.18 | 0.15 | 0.15 | 0.40 | 0.30 |
| AF319546_1 |      |      |      |      |      |      |      |
| 0.31       | 0.21 | 0.29 | 0.19 | 0.29 | 0.22 | 0.25 | 0.24 |
| 0.27       | 0.28 | 0.23 | 0.23 | 0.17 | 0.24 | 0.37 | 0.23 |
| AF326975_2 |      |      |      |      |      |      |      |
| 0.32       | 0.24 | 0.21 | 0.23 | 0.33 | 0.17 | 0.25 | 0.25 |
| 0.30       | 0.22 | 0.26 | 0.22 | 0.19 | 0.22 | 0.34 | 0.26 |
| AF355600_1 |      |      |      |      |      |      |      |
| 0.30       | 0.25 | 0.20 | 0.25 | 0.35 | 0.27 | 0.22 | 0.15 |
| 0.19       | 0.31 | 0.30 | 0.19 | 0.19 | 0.20 | 0.35 | 0.25 |
| AF404111_1 |      |      |      |      |      |      |      |
| 0.27       | 0.23 | 0.26 | 0.24 | 0.31 | 0.20 | 0.22 | 0.28 |
| 0.26       | 0.26 | 0.25 | 0.23 | 0.19 | 0.22 | 0.32 | 0.27 |
| AF421892_1 |      |      |      |      |      |      |      |
| 0.26       | 0.22 | 0.22 | 0.31 | 0.28 | 0.20 | 0.21 | 0.31 |
| 0.27       | 0.20 | 0.25 | 0.28 | 0.17 | 0.20 | 0.33 | 0.30 |
| AF421894_1 |      |      |      |      |      |      |      |
| 0.24       | 0.26 | 0.25 | 0.25 | 0.21 | 0.25 | 0.32 | 0.22 |
| 0.22       | 0.27 | 0.24 | 0.27 | 0.15 | 0.20 | 0.36 | 0.29 |
| AJ005114_1 |      |      |      |      |      |      |      |
| 0.30       | 0.21 | 0.32 | 0.17 | 0.25 | 0.24 | 0.24 | 0.27 |
| 0.22       | 0.30 | 0.23 | 0.24 | 0.09 | 0.25 | 0.38 | 0.29 |
| AJ131148_1 |      |      |      |      |      |      |      |
| 0.24       | 0.27 | 0.24 | 0.24 | 0.27 | 0.26 | 0.29 | 0.18 |
| 0.24       | 0.26 | 0.27 | 0.22 | 0.18 | 0.18 | 0.33 | 0.31 |
| AJ297265_1 |      |      |      |      |      |      |      |
| 0.23       | 0.28 | 0.27 | 0.23 | 0.30 | 0.25 | 0.23 | 0.22 |
| 0.22       | 0.29 | 0.27 | 0.23 | 0.16 | 0.25 | 0.37 | 0.22 |
| AJ308037_1 |      |      |      |      |      |      |      |
| 0.25       | 0.24 | 0.18 | 0.33 | 0.26 | 0.20 | 0.25 | 0.28 |
| 0.16       | 0.32 | 0.25 | 0.27 | 0.11 | 0.28 | 0.30 | 0.31 |
| AY009111_1 |      |      |      |      |      |      |      |
| 0.28       | 0.23 | 0.27 | 0.23 | 0.27 | 0.22 | 0.26 | 0.24 |
| 0.32       | 0.24 | 0.23 | 0.21 | 0.18 | 0.25 | 0.30 | 0.26 |
| AY029070_1 |      |      |      |      |      |      |      |
| 0.26       | 0.26 | 0.25 | 0.23 | 0.26 | 0.22 | 0.32 | 0.20 |
| 0.25       | 0.26 | 0.28 | 0.21 | 0.19 | 0.20 | 0.36 | 0.25 |

|            |      |      |      |      |      |      |      |
|------------|------|------|------|------|------|------|------|
| AY034830_1 |      |      |      |      |      |      |      |
| 0.31       | 0.23 | 0.24 | 0.22 | 0.34 | 0.19 | 0.25 | 0.23 |
| 0.30       | 0.24 | 0.26 | 0.20 | 0.16 | 0.23 | 0.35 | 0.26 |
| AY046919_1 |      |      |      |      |      |      |      |
| 0.28       | 0.23 | 0.24 | 0.24 | 0.32 | 0.18 | 0.26 | 0.24 |
| 0.28       | 0.22 | 0.20 | 0.30 | 0.15 | 0.23 | 0.33 | 0.29 |
| AY046920_1 |      |      |      |      |      |      |      |
| 0.30       | 0.23 | 0.24 | 0.22 | 0.30 | 0.19 | 0.27 | 0.24 |
| 0.29       | 0.22 | 0.19 | 0.30 | 0.16 | 0.23 | 0.31 | 0.29 |
| AY049059_1 |      |      |      |      |      |      |      |
| 0.26       | 0.32 | 0.18 | 0.23 | 0.30 | 0.29 | 0.26 | 0.16 |
| 0.16       | 0.36 | 0.21 | 0.27 | 0.11 | 0.26 | 0.29 | 0.34 |
| J02865_1   |      |      |      |      |      |      |      |
| 0.32       | 0.21 | 0.27 | 0.19 | 0.28 | 0.26 | 0.24 | 0.21 |
| 0.32       | 0.23 | 0.22 | 0.22 | 0.15 | 0.23 | 0.30 | 0.31 |
| J03157_1   |      |      |      |      |      |      |      |
| 0.27       | 0.27 | 0.23 | 0.22 | 0.31 | 0.22 | 0.27 | 0.20 |
| 0.26       | 0.26 | 0.25 | 0.24 | 0.19 | 0.25 | 0.32 | 0.23 |
| J04124_1   |      |      |      |      |      |      |      |
| 0.29       | 0.23 | 0.19 | 0.29 | 0.34 | 0.20 | 0.24 | 0.22 |
| 0.28       | 0.20 | 0.23 | 0.29 | 0.18 | 0.19 | 0.27 | 0.36 |
| J04841     |      |      |      |      |      |      |      |
| 0.27       | 0.27 | 0.23 | 0.22 | 0.31 | 0.22 | 0.27 | 0.20 |
| 0.26       | 0.25 | 0.25 | 0.23 | 0.19 | 0.25 | 0.33 | 0.24 |
| K02836_1   |      |      |      |      |      |      |      |
| 0.20       | 0.32 | 0.27 | 0.22 | 0.25 | 0.25 | 0.23 | 0.26 |
| 0.27       | 0.27 | 0.23 | 0.23 | 0.10 | 0.33 | 0.41 | 0.16 |
| K02836_2   |      |      |      |      |      |      |      |
| 0.18       | 0.34 | 0.27 | 0.21 | 0.26 | 0.25 | 0.25 | 0.24 |
| 0.24       | 0.29 | 0.23 | 0.24 | 0.10 | 0.29 | 0.43 | 0.17 |
| L03778_1   |      |      |      |      |      |      |      |
| 0.33       | 0.21 | 0.22 | 0.24 | 0.33 | 0.18 | 0.25 | 0.25 |
| 0.27       | 0.19 | 0.27 | 0.27 | 0.20 | 0.22 | 0.32 | 0.27 |
| L10721_1   |      |      |      |      |      |      |      |
| 0.33       | 0.26 | 0.19 | 0.22 | 0.23 | 0.20 | 0.31 | 0.26 |
| 0.26       | 0.23 | 0.25 | 0.26 | 0.16 | 0.18 | 0.41 | 0.26 |
| L14477     |      |      |      |      |      |      |      |
| 0.29       | 0.25 | 0.27 | 0.18 | 0.30 | 0.22 | 0.30 | 0.19 |
| 0.30       | 0.24 | 0.23 | 0.23 | 0.12 | 0.23 | 0.47 | 0.17 |
| M14697_1   |      |      |      |      |      |      |      |
| 0.25       | 0.29 | 0.25 | 0.20 | 0.26 | 0.22 | 0.30 | 0.22 |
| 0.28       | 0.27 | 0.26 | 0.19 | 0.12 | 0.28 | 0.41 | 0.20 |

|          |      |      |      |      |      |      |      |  |
|----------|------|------|------|------|------|------|------|--|
| M20570_1 |      |      |      |      |      |      |      |  |
| 0.28     | 0.30 | 0.19 | 0.22 | 0.22 | 0.24 | 0.28 | 0.26 |  |
| 0.26     | 0.31 | 0.23 | 0.19 | 0.15 | 0.19 | 0.40 | 0.26 |  |
| M26803   |      |      |      |      |      |      |      |  |
| 0.28     | 0.26 | 0.24 | 0.22 | 0.29 | 0.21 | 0.28 | 0.23 |  |
| 0.27     | 0.24 | 0.25 | 0.24 | 0.19 | 0.23 | 0.30 | 0.27 |  |
| M27163   |      |      |      |      |      |      |      |  |
| 0.26     | 0.27 | 0.25 | 0.22 | 0.28 | 0.22 | 0.27 | 0.23 |  |
| 0.25     | 0.25 | 0.24 | 0.26 | 0.17 | 0.23 | 0.32 | 0.28 |  |
| M32139_1 |      |      |      |      |      |      |      |  |
| 0.26     | 0.26 | 0.30 | 0.17 | 0.26 | 0.18 | 0.33 | 0.23 |  |
| 0.29     | 0.23 | 0.27 | 0.21 | 0.16 | 0.21 | 0.39 | 0.24 |  |
| M36124   |      |      |      |      |      |      |      |  |
| 0.28     | 0.26 | 0.25 | 0.21 | 0.28 | 0.24 | 0.29 | 0.20 |  |
| 0.19     | 0.33 | 0.24 | 0.23 | 0.11 | 0.26 | 0.46 | 0.18 |  |
| M60653_1 |      |      |      |      |      |      |      |  |
| 0.27     | 0.21 | 0.24 | 0.28 | 0.33 | 0.17 | 0.21 | 0.28 |  |
| 0.30     | 0.19 | 0.24 | 0.26 | 0.16 | 0.25 | 0.28 | 0.31 |  |
| M73769   |      |      |      |      |      |      |      |  |
| 0.27     | 0.27 | 0.25 | 0.21 | 0.31 | 0.19 | 0.27 | 0.23 |  |
| 0.25     | 0.27 | 0.23 | 0.25 | 0.14 | 0.21 | 0.37 | 0.29 |  |
| M74167_1 |      |      |      |      |      |      |      |  |
| 0.22     | 0.29 | 0.26 | 0.22 | 0.24 | 0.22 | 0.27 | 0.27 |  |
| 0.30     | 0.24 | 0.21 | 0.26 | 0.17 | 0.23 | 0.36 | 0.24 |  |
| U06644_2 |      |      |      |      |      |      |      |  |
| 0.30     | 0.21 | 0.24 | 0.24 | 0.26 | 0.17 | 0.25 | 0.32 |  |
| 0.33     | 0.15 | 0.28 | 0.24 | 0.12 | 0.19 | 0.43 | 0.25 |  |
| U10562   |      |      |      |      |      |      |      |  |
| 0.26     | 0.28 | 0.26 | 0.20 | 0.27 | 0.23 | 0.32 | 0.18 |  |
| 0.29     | 0.25 | 0.24 | 0.23 | 0.10 | 0.28 | 0.46 | 0.16 |  |
| U20092   |      |      |      |      |      |      |      |  |
| 0.23     | 0.27 | 0.22 | 0.29 | 0.29 | 0.17 | 0.28 | 0.26 |  |
| 0.29     | 0.19 | 0.24 | 0.27 | 0.19 | 0.19 | 0.35 | 0.27 |  |
| U20781   |      |      |      |      |      |      |      |  |
| 0.31     | 0.21 | 0.21 | 0.27 | 0.25 | 0.28 | 0.25 | 0.22 |  |
| 0.26     | 0.22 | 0.29 | 0.23 | 0.14 | 0.22 | 0.36 | 0.28 |  |
| U22048   |      |      |      |      |      |      |      |  |
| 0.26     | 0.28 | 0.26 | 0.20 | 0.24 | 0.23 | 0.38 | 0.16 |  |
| 0.25     | 0.24 | 0.30 | 0.21 | 0.14 | 0.24 | 0.36 | 0.26 |  |
| U24677_1 |      |      |      |      |      |      |      |  |
| 0.31     | 0.23 | 0.25 | 0.21 | 0.41 | 0.15 | 0.22 | 0.22 |  |
| 0.33     | 0.17 | 0.22 | 0.28 | 0.18 | 0.15 | 0.30 | 0.37 |  |



|          |      |      |      |      |      |      |      |
|----------|------|------|------|------|------|------|------|
| U24678   |      |      |      |      |      |      |      |
| 0.34     | 0.22 | 0.29 | 0.15 | 0.27 | 0.18 | 0.31 | 0.24 |
| 0.23     | 0.28 | 0.27 | 0.22 | 0.14 | 0.27 | 0.33 | 0.25 |
| U26666   |      |      |      |      |      |      |      |
| 0.34     | 0.25 | 0.16 | 0.24 | 0.29 | 0.24 | 0.20 | 0.27 |
| 0.33     | 0.19 | 0.24 | 0.23 | 0.11 | 0.27 | 0.36 | 0.27 |
| U28866   |      |      |      |      |      |      |      |
| 0.25     | 0.25 | 0.22 | 0.28 | 0.25 | 0.26 | 0.27 | 0.22 |
| 0.24     | 0.23 | 0.26 | 0.27 | 0.17 | 0.26 | 0.31 | 0.27 |
| U29199   |      |      |      |      |      |      |      |
| 0.27     | 0.24 | 0.27 | 0.22 | 0.31 | 0.22 | 0.28 | 0.20 |
| 0.30     | 0.24 | 0.27 | 0.18 | 0.16 | 0.28 | 0.31 | 0.26 |
| U32987_1 |      |      |      |      |      |      |      |
| 0.28     | 0.24 | 0.21 | 0.27 | 0.23 | 0.20 | 0.27 | 0.29 |
| 0.22     | 0.23 | 0.29 | 0.26 | 0.16 | 0.18 | 0.39 | 0.27 |
| U43702   |      |      |      |      |      |      |      |
| 0.22     | 0.31 | 0.27 | 0.20 | 0.26 | 0.21 | 0.27 | 0.25 |
| 0.22     | 0.27 | 0.28 | 0.23 | 0.15 | 0.20 | 0.42 | 0.23 |
| U43717   |      |      |      |      |      |      |      |
| 0.27     | 0.23 | 0.21 | 0.28 | 0.24 | 0.25 | 0.27 | 0.25 |
| 0.27     | 0.20 | 0.25 | 0.28 | 0.18 | 0.19 | 0.38 | 0.26 |
| U47286   |      |      |      |      |      |      |      |
| 0.30     | 0.25 | 0.27 | 0.18 | 0.25 | 0.26 | 0.30 | 0.19 |
| 0.23     | 0.34 | 0.19 | 0.24 | 0.13 | 0.29 | 0.38 | 0.20 |
| U52964   |      |      |      |      |      |      |      |
| 0.30     | 0.29 | 0.21 | 0.20 | 0.26 | 0.30 | 0.25 | 0.20 |
| 0.27     | 0.29 | 0.18 | 0.27 | 0.13 | 0.24 | 0.32 | 0.31 |
| U68270_1 |      |      |      |      |      |      |      |
| 0.30     | 0.28 | 0.23 | 0.19 | 0.34 | 0.23 | 0.25 | 0.18 |
| 0.15     | 0.35 | 0.29 | 0.21 | 0.09 | 0.33 | 0.32 | 0.26 |
| U74470   |      |      |      |      |      |      |      |
| 0.28     | 0.26 | 0.28 | 0.18 | 0.24 | 0.21 | 0.31 | 0.24 |
| 0.21     | 0.25 | 0.28 | 0.26 | 0.15 | 0.18 | 0.37 | 0.29 |
| U96712   |      |      |      |      |      |      |      |
| 0.29     | 0.23 | 0.22 | 0.27 | 0.32 | 0.17 | 0.28 | 0.23 |
| 0.27     | 0.21 | 0.26 | 0.26 | 0.18 | 0.25 | 0.30 | 0.27 |
| X14399_1 |      |      |      |      |      |      |      |
| 0.27     | 0.24 | 0.24 | 0.25 | 0.27 | 0.21 | 0.29 | 0.24 |
| 0.27     | 0.26 | 0.25 | 0.22 | 0.14 | 0.24 | 0.34 | 0.29 |
| X53464_1 |      |      |      |      |      |      |      |
| 0.30     | 0.21 | 0.26 | 0.23 | 0.24 | 0.18 | 0.25 | 0.33 |
| 0.32     | 0.17 | 0.29 | 0.21 | 0.13 | 0.21 | 0.41 | 0.25 |

|          |      |      |      |      |      |      |      |      |
|----------|------|------|------|------|------|------|------|------|
| X56511_1 | 0.29 | 0.22 | 0.23 | 0.26 | 0.28 | 0.17 | 0.32 | 0.23 |
|          | 0.44 | 0.17 | 0.25 | 0.14 | 0.09 | 0.31 | 0.36 | 0.24 |
| X56511_2 | 0.28 | 0.23 | 0.28 | 0.20 | 0.34 | 0.16 | 0.26 | 0.24 |
|          | 0.32 | 0.20 | 0.25 | 0.22 | 0.17 | 0.24 | 0.29 | 0.30 |
| X56511_3 | 0.32 | 0.21 | 0.31 | 0.16 | 0.26 | 0.22 | 0.29 | 0.24 |
|          | 0.28 | 0.30 | 0.24 | 0.18 | 0.11 | 0.22 | 0.38 | 0.28 |
| X60951_1 | 0.32 | 0.22 | 0.21 | 0.24 | 0.29 | 0.19 | 0.22 | 0.30 |
|          | 0.27 | 0.25 | 0.24 | 0.24 | 0.19 | 0.18 | 0.30 | 0.33 |
| X60951_2 | 0.29 | 0.22 | 0.25 | 0.23 | 0.27 | 0.21 | 0.26 | 0.26 |
|          | 0.32 | 0.21 | 0.23 | 0.24 | 0.18 | 0.24 | 0.29 | 0.29 |
| X62148   | 0.31 | 0.20 | 0.29 | 0.20 | 0.23 | 0.19 | 0.33 | 0.25 |
|          | 0.30 | 0.18 | 0.33 | 0.19 | 0.19 | 0.16 | 0.35 | 0.30 |
| X91142_1 | 0.29 | 0.24 | 0.24 | 0.22 | 0.23 | 0.28 | 0.24 | 0.24 |
|          | 0.22 | 0.34 | 0.21 | 0.22 | 0.08 | 0.32 | 0.38 | 0.22 |
| X99951_1 | 0.27 | 0.28 | 0.25 | 0.20 | 0.34 | 0.18 | 0.24 | 0.25 |
|          | 0.30 | 0.22 | 0.28 | 0.19 | 0.19 | 0.21 | 0.30 | 0.30 |
| Y12638_1 | 0.29 | 0.25 | 0.22 | 0.24 | 0.28 | 0.23 | 0.26 | 0.23 |
|          | 0.28 | 0.22 | 0.27 | 0.23 | 0.17 | 0.23 | 0.31 | 0.28 |

## Independent test data

The data used to evaluate the model was derived from 103 functionally annotated ORFs on Chromosomes I and II of *T. brucei*. The complete coding region of each ORF was used as the coding sequence and 400 nucleotides of upstream sequence was used as the representative non-coding region. For each sequence, the function assignment as predicted by Sanger Institute (for Chromosome I ORFs, signified by identifiers that start with Tb927\_) or by The Institute for Genome Research (TIGR, for Chromosome II ORFs, signified by the identifier tags that start with 59.m) is listed along with the actual transition probabilities.

### Non-coding regions - Independent Test Set

|                                                                     |      |      |      |      |      |      |      |      |
|---------------------------------------------------------------------|------|------|------|------|------|------|------|------|
| 59.m00159 Cyclophilin                                               | 0.31 | 0.30 | 0.22 | 0.17 | 0.28 | 0.27 | 0.19 | 0.27 |
|                                                                     | 0.20 | 0.25 | 0.18 | 0.37 | 0.17 | 0.18 | 0.29 | 0.37 |
| 59.m00203 NIMA/Nek Serine/threonine-protein kinase family, putative | 0.40 | 0.19 | 0.20 | 0.21 | 0.44 | 0.19 | 0.15 | 0.23 |
|                                                                     | 0.33 | 0.17 | 0.20 | 0.29 | 0.44 | 0.20 | 0.11 | 0.26 |
| 59.m00204 Small GTP binding protein RAB6                            | 0.51 | 0.08 | 0.13 | 0.29 | 0.44 | 0.09 | 0.25 | 0.22 |
|                                                                     | 0.27 | 0.11 | 0.24 | 0.38 | 0.39 | 0.06 | 0.21 | 0.34 |
| 59.m00209 Ribosomal RNA processing protein RRP41B                   | 0.29 | 0.19 | 0.13 | 0.40 | 0.34 | 0.21 | 0.09 | 0.36 |
|                                                                     | 0.11 | 0.20 | 0.23 | 0.45 | 0.29 | 0.20 | 0.19 | 0.32 |
| 59.m00210 Histone deacetylase, putative                             | 0.41 | 0.23 | 0.18 | 0.18 | 0.33 | 0.26 | 0.24 | 0.16 |
|                                                                     | 0.23 | 0.23 | 0.32 | 0.22 | 0.15 | 0.29 | 0.26 | 0.30 |
| 59.m00215 Exportin (tRNA), putative                                 | 0.44 | 0.09 | 0.22 | 0.26 | 0.33 | 0.13 | 0.28 | 0.26 |
|                                                                     | 0.29 | 0.15 | 0.31 | 0.25 | 0.48 | 0.12 | 0.11 | 0.28 |
| 59.m00217 Phosphatidylinositol 3-kinase, putative                   | 0.46 | 0.18 | 0.25 | 0.12 | 0.46 | 0.15 | 0.24 | 0.16 |
|                                                                     | 0.36 | 0.16 | 0.28 | 0.20 | 0.31 | 0.20 | 0.17 | 0.32 |
| 59.m00235 Proteasome regulatory non-ATPase subunit 6 (RPN6)         | 0.47 | 0.20 | 0.20 | 0.13 | 0.30 | 0.21 | 0.25 | 0.24 |
|                                                                     | 0.29 | 0.26 | 0.23 | 0.23 | 0.17 | 0.24 | 0.17 | 0.41 |

|                                                             |      |      |      |      |      |      |      |      |
|-------------------------------------------------------------|------|------|------|------|------|------|------|------|
| 59.m00236 Methyltransferase                                 | 0.46 | 0.18 | 0.21 | 0.15 | 0.34 | 0.22 | 0.22 | 0.21 |
|                                                             | 0.28 | 0.14 | 0.31 | 0.27 | 0.23 | 0.22 | 0.16 | 0.38 |
| 59.m00237 Ubiquitin-conjugating enzyme E2                   | 0.35 | 0.23 | 0.22 | 0.19 | 0.25 | 0.26 | 0.22 | 0.27 |
|                                                             | 0.32 | 0.24 | 0.26 | 0.18 | 0.19 | 0.30 | 0.26 | 0.25 |
| 59.m00238 RNA-editing complex protein MP81                  | 0.25 | 0.17 | 0.25 | 0.32 | 0.39 | 0.21 | 0.15 | 0.25 |
|                                                             | 0.24 | 0.24 | 0.20 | 0.33 | 0.26 | 0.14 | 0.18 | 0.42 |
| 59.m00258 Histone H4                                        | 0.34 | 0.22 | 0.20 | 0.25 | 0.34 | 0.24 | 0.13 | 0.30 |
|                                                             | 0.26 | 0.34 | 0.13 | 0.27 | 0.11 | 0.33 | 0.16 | 0.40 |
| 59.m00263 Protein kinase, putative                          | 0.26 | 0.16 | 0.28 | 0.31 | 0.19 | 0.29 | 0.22 | 0.29 |
|                                                             | 0.18 | 0.22 | 0.21 | 0.38 | 0.25 | 0.15 | 0.19 | 0.40 |
| 59.m00281 Actin-related protein, ARP2/3 complex subunit     | 0.17 | 0.21 | 0.11 | 0.50 | 0.22 | 0.23 | 0.16 | 0.39 |
|                                                             | 0.15 | 0.10 | 0.20 | 0.55 | 0.17 | 0.21 | 0.15 | 0.47 |
| 59.m00299 Fatty acid desaturase                             | 0.45 | 0.11 | 0.17 | 0.27 | 0.31 | 0.19 | 0.14 | 0.37 |
|                                                             | 0.44 | 0.16 | 0.28 | 0.12 | 0.26 | 0.17 | 0.10 | 0.47 |
| 59.m00349 Transcription elongation factor S-II, putative    | 0.45 | 0.14 | 0.26 | 0.15 | 0.25 | 0.21 | 0.25 | 0.28 |
|                                                             | 0.33 | 0.19 | 0.33 | 0.14 | 0.27 | 0.15 | 0.09 | 0.49 |
| 59.m00353 GTP-binding elongation factor Tu family, putative | 0.36 | 0.22 | 0.21 | 0.20 | 0.25 | 0.21 | 0.14 | 0.40 |
|                                                             | 0.32 | 0.19 | 0.17 | 0.32 | 0.17 | 0.27 | 0.16 | 0.40 |
| 59.m00363 Ubiquitin-conjugating enzyme, putative            | 0.32 | 0.18 | 0.17 | 0.33 | 0.39 | 0.12 | 0.14 | 0.36 |
|                                                             | 0.33 | 0.14 | 0.25 | 0.28 | 0.35 | 0.14 | 0.12 | 0.39 |
| 59.m00369 Translation initiation factor IF-2, putative      | 0.29 | 0.24 | 0.22 | 0.25 | 0.38 | 0.23 | 0.27 | 0.12 |
|                                                             | 0.29 | 0.27 | 0.24 | 0.20 | 0.35 | 0.24 | 0.12 | 0.29 |
| 59.m00379 Ribonucleoprotein F, putative                     | 0.54 | 0.13 | 0.24 | 0.09 | 0.52 | 0.15 | 0.15 | 0.17 |
|                                                             | 0.48 | 0.09 | 0.24 | 0.19 | 0.29 | 0.08 | 0.16 | 0.48 |
| 59.m00382 Beta-ketoacyl synthase family protein             | 0.33 | 0.28 | 0.23 | 0.16 | 0.43 | 0.06 | 0.22 | 0.28 |
|                                                             | 0.19 | 0.15 | 0.32 | 0.34 | 0.27 | 0.13 | 0.32 | 0.28 |

59.m00384 MCM family protein  
0.50 0.19 0.17 0.13 0.35 0.20 0.22 0.23  
0.31 0.17 0.31 0.21 0.26 0.18 0.18 0.39  
59.m00393 Amyloid precursor protein-binding protein 1 (APP-BP1),  
putative  
0.27 0.27 0.19 0.28 0.28 0.29 0.18 0.26  
0.18 0.22 0.25 0.35 0.19 0.21 0.18 0.43  
59.m00397 Dynein intermediate chain, putative  
0.38 0.19 0.19 0.23 0.37 0.17 0.16 0.30  
0.22 0.20 0.34 0.24 0.20 0.19 0.16 0.46  
59.m00402 Mitochondrial processing peptidase alpha subunit, putative  
0.48 0.13 0.18 0.21 0.32 0.15 0.23 0.30  
0.24 0.14 0.24 0.37 0.17 0.18 0.25 0.41  
59.m00404 Enoyl-CoA hydratase/Enoyl-CoA isomerase/3-hydroxyacyl-CoA  
dehydrogenase, putative  
0.23 0.27 0.21 0.28 0.28 0.16 0.30 0.26  
0.22 0.18 0.21 0.38 0.14 0.15 0.27 0.44  
59.m00412 Glycosomal phosphoenolpyruvate carboxykinase  
0.28 0.20 0.20 0.32 0.34 0.21 0.14 0.30  
0.21 0.16 0.14 0.49 0.24 0.20 0.19 0.38  
59.m00415 GTP binding protein, putative  
0.33 0.23 0.09 0.35 0.45 0.21 0.13 0.22  
0.23 0.15 0.23 0.39 0.25 0.25 0.20 0.30  
59.m00419 Dual specificity phosphatase (MKP), putative  
0.39 0.23 0.26 0.13 0.34 0.23 0.17 0.26  
0.26 0.21 0.27 0.25 0.26 0.10 0.32 0.33  
59.m00424 Paraflagellar rod protein, putative  
0.39 0.18 0.24 0.19 0.51 0.11 0.10 0.28  
0.33 0.09 0.26 0.33 0.30 0.19 0.15 0.36  
59.m00428 Trypanothione synthetase  
0.37 0.17 0.15 0.30 0.37 0.14 0.22 0.27  
0.19 0.24 0.16 0.41 0.16 0.11 0.27 0.47  
59.m00430 Endo/exonuclease Mre11, putative  
0.12 0.22 0.19 0.47 0.17 0.33 0.16 0.35  
0.17 0.21 0.23 0.38 0.13 0.17 0.25 0.45  
59.m00445 Small nuclear ribonucleoprotein protein, putative  
0.43 0.20 0.19 0.18 0.26 0.23 0.13 0.38  
0.32 0.22 0.25 0.22 0.19 0.23 0.12 0.47  
59.m00446 FtsJ cell division protein, putative

|           |                                                      |      |      |      |      |      |      |
|-----------|------------------------------------------------------|------|------|------|------|------|------|
| 0.28      | 0.15                                                 | 0.22 | 0.35 | 0.31 | 0.22 | 0.19 | 0.28 |
| 0.31      | 0.26                                                 | 0.16 | 0.27 | 0.19 | 0.16 | 0.21 | 0.44 |
| 59.m00450 | Branched-chain amino acid aminotransferase           |      |      |      |      |      |      |
| 0.26      | 0.31                                                 | 0.13 | 0.31 | 0.36 | 0.19 | 0.17 | 0.28 |
| 0.18      | 0.20                                                 | 0.09 | 0.52 | 0.27 | 0.11 | 0.22 | 0.41 |
| 59.m00462 | RNA-binding protein, putative                        |      |      |      |      |      |      |
| 0.53      | 0.14                                                 | 0.23 | 0.09 | 0.33 | 0.22 | 0.25 | 0.20 |
| 0.31      | 0.13                                                 | 0.36 | 0.19 | 0.31 | 0.19 | 0.13 | 0.37 |
| 59.m00478 | Dual specificity protein phosphatase, putative       |      |      |      |      |      |      |
| 0.14      | 0.19                                                 | 0.27 | 0.41 | 0.25 | 0.17 | 0.25 | 0.32 |
| 0.10      | 0.23                                                 | 0.17 | 0.50 | 0.17 | 0.09 | 0.30 | 0.43 |
| 59.m00484 | Esterase, putative                                   |      |      |      |      |      |      |
| 0.21      | 0.21                                                 | 0.24 | 0.35 | 0.30 | 0.25 | 0.25 | 0.20 |
| 0.15      | 0.17                                                 | 0.19 | 0.49 | 0.17 | 0.13 | 0.37 | 0.33 |
| 59.m00493 | Acyl-CoA oxidase, putative                           |      |      |      |      |      |      |
| 0.32      | 0.15                                                 | 0.29 | 0.24 | 0.34 | 0.27 | 0.19 | 0.20 |
| 0.19      | 0.17                                                 | 0.37 | 0.28 | 0.26 | 0.18 | 0.24 | 0.32 |
| 59.m00494 | Transcription initiation protein, putative           |      |      |      |      |      |      |
| 0.27      | 0.19                                                 | 0.23 | 0.31 | 0.30 | 0.20 | 0.22 | 0.28 |
| 0.26      | 0.20                                                 | 0.28 | 0.25 | 0.18 | 0.17 | 0.29 | 0.36 |
| 59.m00496 | Protein phosphatase 2C, putative                     |      |      |      |      |      |      |
| 0.34      | 0.14                                                 | 0.28 | 0.24 | 0.25 | 0.17 | 0.23 | 0.35 |
| 0.35      | 0.17                                                 | 0.26 | 0.23 | 0.25 | 0.18 | 0.23 | 0.34 |
| 59.m00503 | Vesicle-associated membrane protein (VAMP), putative |      |      |      |      |      |      |
| 0.22      | 0.08                                                 | 0.21 | 0.50 | 0.15 | 0.19 | 0.17 | 0.50 |
| 0.19      | 0.13                                                 | 0.21 | 0.48 | 0.20 | 0.12 | 0.24 | 0.44 |
| 59.m00506 | TPR-repeat protein, putative                         |      |      |      |      |      |      |
| 0.25      | 0.17                                                 | 0.28 | 0.29 | 0.32 | 0.22 | 0.13 | 0.33 |
| 0.20      | 0.17                                                 | 0.23 | 0.40 | 0.27 | 0.20 | 0.20 | 0.32 |
| 59.m00509 | Aldo-keto reductase, putative                        |      |      |      |      |      |      |
| 0.35      | 0.16                                                 | 0.17 | 0.32 | 0.21 | 0.19 | 0.19 | 0.40 |
| 0.30      | 0.22                                                 | 0.29 | 0.20 | 0.25 | 0.15 | 0.25 | 0.35 |
| 59.m00512 | 3-oxoacyl-(acyl-carrier protein) reductase, putative |      |      |      |      |      |      |
| 0.37      | 0.19                                                 | 0.21 | 0.24 | 0.27 | 0.24 | 0.19 | 0.29 |
| 0.24      | 0.23                                                 | 0.24 | 0.28 | 0.17 | 0.14 | 0.32 | 0.38 |
| 59.m00514 | Protein kinase, putative                             |      |      |      |      |      |      |
| 0.32      | 0.31                                                 | 0.21 | 0.16 | 0.19 | 0.26 | 0.25 | 0.30 |
| 0.19      | 0.30                                                 | 0.25 | 0.26 | 0.11 | 0.22 | 0.22 | 0.45 |
| 59.m00515 | Cell cycle control protein (CWF8), putative          |      |      |      |      |      |      |

|              |                                                        |      |      |      |      |      |      |
|--------------|--------------------------------------------------------|------|------|------|------|------|------|
| 0.27         | 0.26                                                   | 0.31 | 0.15 | 0.31 | 0.22 | 0.12 | 0.35 |
| 0.26         | 0.17                                                   | 0.38 | 0.18 | 0.17 | 0.23 | 0.26 | 0.33 |
| 59.m00516    | Tubulin-tyrosine ligase, putative                      |      |      |      |      |      |      |
| 0.23         | 0.21                                                   | 0.24 | 0.32 | 0.33 | 0.16 | 0.12 | 0.39 |
| 0.19         | 0.25                                                   | 0.22 | 0.34 | 0.20 | 0.18 | 0.33 | 0.30 |
| 59.m00518    | Dynein heavy chain, putative                           |      |      |      |      |      |      |
| 0.38         | 0.15                                                   | 0.23 | 0.24 | 0.24 | 0.23 | 0.19 | 0.34 |
| 0.16         | 0.28                                                   | 0.30 | 0.26 | 0.17 | 0.22 | 0.30 | 0.31 |
| 59.m00557    | Adenylate kinase                                       |      |      |      |      |      |      |
| 0.29         | 0.22                                                   | 0.26 | 0.23 | 0.22 | 0.19 | 0.23 | 0.36 |
| 0.24         | 0.16                                                   | 0.26 | 0.34 | 0.23 | 0.18 | 0.27 | 0.32 |
| 59.m00566    | Tyrosyl-DNA Phosphodiesterase (Tdp1), putative         |      |      |      |      |      |      |
| 0.34         | 0.15                                                   | 0.17 | 0.33 | 0.30 | 0.25 | 0.23 | 0.22 |
| 0.27         | 0.12                                                   | 0.21 | 0.40 | 0.26 | 0.18 | 0.12 | 0.45 |
| 59.m00571    | Sedoheptulose-1,7-bisphosphatase                       |      |      |      |      |      |      |
| 0.39         | 0.20                                                   | 0.12 | 0.29 | 0.24 | 0.20 | 0.12 | 0.44 |
| 0.17         | 0.23                                                   | 0.30 | 0.30 | 0.23 | 0.22 | 0.15 | 0.40 |
| 59.m00576    | Small nuclear ribonucleoprotein Sm D2                  |      |      |      |      |      |      |
| 0.25         | 0.29                                                   | 0.19 | 0.28 | 0.22 | 0.33 | 0.24 | 0.20 |
| 0.15         | 0.22                                                   | 0.26 | 0.38 | 0.11 | 0.25 | 0.25 | 0.39 |
| 59.m00589    | Heat shock protein 100 (clp protein)                   |      |      |      |      |      |      |
| 0.27         | 0.19                                                   | 0.20 | 0.34 | 0.24 | 0.29 | 0.19 | 0.28 |
| 0.19         | 0.25                                                   | 0.15 | 0.40 | 0.18 | 0.16 | 0.17 | 0.49 |
| 59.m00591    | Glycosylphosphatidylinositol-specific phospholipase C  |      |      |      |      |      |      |
| 0.40         | 0.10                                                   | 0.24 | 0.27 | 0.15 | 0.27 | 0.22 | 0.36 |
| 0.30         | 0.10                                                   | 0.21 | 0.39 | 0.19 | 0.14 | 0.20 | 0.47 |
| 59.m00596    | Beta prime COP protein                                 |      |      |      |      |      |      |
| 0.57         | 0.05                                                   | 0.27 | 0.11 | 0.50 | 0.10 | 0.10 | 0.30 |
| 0.51         | 0.07                                                   | 0.22 | 0.20 | 0.20 | 0.11 | 0.17 | 0.51 |
| 59.m00600    | Ribosomal protein L44                                  |      |      |      |      |      |      |
| 0.33         | 0.13                                                   | 0.15 | 0.38 | 0.35 | 0.24 | 0.14 | 0.27 |
| 0.27         | 0.22                                                   | 0.18 | 0.33 | 0.27 | 0.14 | 0.14 | 0.45 |
| 59.m00606    | Nucleoside transporter family protein                  |      |      |      |      |      |      |
| 0.34         | 0.10                                                   | 0.14 | 0.42 | 0.51 | 0.09 | 0.04 | 0.36 |
| 0.25         | 0.15                                                   | 0.09 | 0.51 | 0.27 | 0.11 | 0.16 | 0.45 |
| 59.m00609    | Iron/ascorbate oxidoreductase family protein, putative |      |      |      |      |      |      |
| 0.28         | 0.25                                                   | 0.14 | 0.34 | 0.34 | 0.17 | 0.12 | 0.38 |
| 0.19         | 0.20                                                   | 0.17 | 0.44 | 0.23 | 0.17 | 0.26 | 0.34 |
| Tb927.1.1000 | developmentally regulated phosphoprotein 284697:285959 |      |      |      |      |      |      |

forward MW:47207  
 0.32 0.15 0.27 0.26 0.23 0.19 0.23 0.35  
 0.37 0.17 0.18 0.28 0.20 0.19 0.24 0.37  
 Tb927.1.1130 glycerol-3-phosphate dehydrogenase (FAD-dependent),  
 possible 308784:310637 forward MW:66175  
 0.39 0.19 0.23 0.18 0.19 0.23 0.18 0.40  
 0.19 0.13 0.26 0.42 0.24 0.18 0.29 0.29  
 Tb927.1.1150 zeta tubulin 312633:314075 forward MW:52705  
 0.25 0.30 0.17 0.28 0.21 0.24 0.18 0.38  
 0.12 0.27 0.18 0.44 0.12 0.21 0.23 0.44  
 Tb927.1.1230 chaperone protein DNAJ, probable 322467:323909 forward  
 MW:52354  
 0.29 0.16 0.24 0.31 0.21 0.16 0.29 0.34  
 0.34 0.17 0.28 0.21 0.12 0.09 0.30 0.48  
 Tb927.1.1240 cytidine triphosphate synthase, probable 325093:326862  
 forward MW:65213  
 0.46 0.22 0.18 0.14 0.24 0.23 0.19 0.34  
 0.20 0.27 0.24 0.29 0.09 0.17 0.23 0.52  
 Tb927.1.1270 homocysteine S-methyltransferase, possible 329491:330792  
 forward MW:48278  
 0.58 0.12 0.08 0.22 0.16 0.31 0.10 0.43  
 0.24 0.13 0.17 0.46 0.18 0.17 0.12 0.53  
 Tb927.1.1350 kinesin heavy chain isoform 5c, probable 340589:343249  
 forward MW:96582  
 0.42 0.21 0.24 0.14 0.25 0.27 0.24 0.25  
 0.21 0.22 0.34 0.24 0.15 0.20 0.20 0.44  
 Tb927.1.1380 serine/threonine protein phosphatase 2a, probable  
 348045:349766 forward MW:62616  
 0.35 0.15 0.32 0.18 0.37 0.15 0.27 0.21  
 0.42 0.14 0.28 0.16 0.39 0.20 0.12 0.29  
 Tb927.1.1530 protein kinase, possible 380514:385742 forward MW:191481  
 0.31 0.17 0.10 0.42 0.11 0.34 0.20 0.34  
 0.25 0.07 0.20 0.48 0.21 0.15 0.19 0.45  
 Tb927.1.1560 vesicular-fusion protein NsF, possible 394480:396657 forward  
 MW:79955  
 0.42 0.17 0.19 0.22 0.38 0.13 0.25 0.24  
 0.24 0.21 0.28 0.27 0.15 0.13 0.25 0.48  
 Tb927.1.1580 cytochrome c oxidase assembly factor, possible 398579:399484  
 forward MW:33578



0.35 0.16 0.17 0.32 0.38 0.21 0.13 0.28  
 0.26 0.24 0.21 0.29 0.20 0.15 0.20 0.45  
 Tb927.1.1620 ATP-dependent RNA helicase, probable 407764:409983  
 forward MW:81819  
 0.33 0.16 0.28 0.24 0.30 0.21 0.14 0.34  
 0.24 0.20 0.29 0.28 0.24 0.15 0.24 0.37  
 Tb927.1.1770 glutaredoxin, possible 461717:462040 forward MW:12152  
 0.42 0.18 0.18 0.22 0.36 0.16 0.16 0.32  
 0.25 0.12 0.29 0.33 0.24 0.11 0.13 0.52  
 Tb927.1.1930 phosphatidylinositol 3-kinase, probable 496357:505068  
 forward MW:324220  
 0.31 0.20 0.35 0.14 0.35 0.23 0.27 0.15  
 0.26 0.20 0.30 0.24 0.33 0.17 0.20 0.30  
 Tb927.1.1960 DNAJ-like protein, possible 508843:510819 forward  
 MW:75712  
 0.46 0.16 0.18 0.20 0.50 0.13 0.19 0.18  
 0.38 0.16 0.23 0.22 0.32 0.22 0.14 0.31  
 Tb927.1.2100 calpain-like protein, probable 526387:529827 forward  
 MW:126155  
 0.24 0.13 0.22 0.40 0.25 0.23 0.21 0.32  
 0.21 0.25 0.23 0.32 0.22 0.14 0.29 0.35  
 Tb927.1.2330 beta tubulin 565286:566614 forward MW:49704  
 0.31 0.19 0.13 0.37 0.22 0.26 0.11 0.42  
 0.23 0.15 0.13 0.48 0.19 0.27 0.14 0.40  
 Tb927.1.2340 alpha tubulin 567246:568601 forward MW:49787  
 0.24 0.32 0.18 0.27 0.29 0.23 0.13 0.35  
 0.20 0.19 0.19 0.43 0.23 0.27 0.25 0.25  
 Tb927.1.2430 histone H3, probable 586961:587701 forward MW:27684  
 0.31 0.28 0.16 0.24 0.32 0.26 0.16 0.25  
 0.29 0.24 0.25 0.22 0.22 0.27 0.28 0.23  
 Tb927.1.2570 beta-coP coatomer beta subunit  
 0.23 0.17 0.32 0.28 0.17 0.35 0.09 0.39  
 0.32 0.07 0.33 0.29 0.13 0.15 0.25 0.47  
 Tb927.1.2600 RNA-binding regulatory protein (pumilio family), possible  
 604834:606837 forward MW:74066  
 0.45 0.15 0.26 0.14 0.39 0.17 0.23 0.21  
 0.37 0.19 0.24 0.19 0.45 0.15 0.17 0.23  
 Tb927.1.2670 axoneme central apparatus protein, possible 613733:615274  
 forward MW:56126

0.50 0.09 0.29 0.13 0.51 0.10 0.15 0.23  
 0.48 0.11 0.22 0.19 0.30 0.11 0.13 0.45  
 Tb927.1.2820 pteridine transporter, possible 636083:638041 reverse  
 MW:70809  
 0.27 0.21 0.20 0.33 0.20 0.18 0.23 0.39  
 0.22 0.17 0.20 0.42 0.16 0.14 0.37 0.33  
 Tb927.1.3000 aminoacylase, probable 661811:663019 forward MW:42938  
 0.35 0.19 0.31 0.15 0.30 0.23 0.26 0.21  
 0.31 0.24 0.24 0.21 0.14 0.27 0.29 0.30  
 Tb927.1.3030 MP48, TbREL2 targeted to the mitochondrion by the first 17  
 amino TBMP48 (RNA editing ligase)  
 0.28 0.33 0.25 0.14 0.19 0.29 0.23 0.29  
 0.17 0.28 0.34 0.21 0.12 0.31 0.25 0.33  
 Tb927.1.3110 soluble N-ethylmaleimide sensitive factor (NSF) attachment  
 protein, possible 672570:673415 forward MW:32136  
 0.28 0.31 0.18 0.23 0.33 0.26 0.18 0.22  
 0.19 0.22 0.23 0.36 0.25 0.19 0.25 0.31  
 Tb927.1.3120 separin (C50 family cysteine protease), probable  
 673957:677436 forward MW:126338  
 0.30 0.26 0.21 0.22 0.21 0.38 0.14 0.27  
 0.27 0.31 0.12 0.30 0.16 0.25 0.16 0.43  
 Tb927.1.3200 phosphatase-like protein, possible 684959:685624 forward  
 MW:24493  
 0.39 0.20 0.23 0.18 0.30 0.20 0.17 0.33  
 0.21 0.32 0.24 0.24 0.24 0.21 0.14 0.41  
 Tb927.1.3230 cell division cycle protein, possible 689122:691269 forward  
 MW:77315  
 0.29 0.21 0.31 0.18 0.24 0.30 0.17 0.29  
 0.26 0.33 0.19 0.22 0.24 0.24 0.22 0.29  
 Tb927.1.3300 Zinc-binding phosphatase, possible 712788:715406 forward  
 MW:97545  
 0.37 0.30 0.14 0.18 0.34 0.24 0.16 0.26  
 0.16 0.21 0.32 0.31 0.17 0.22 0.21 0.41  
 Tb927.1.3820 ATP synthase subunit, probable 810552:810953 forward  
 MW:14198  
 0.20 0.27 0.28 0.26 0.24 0.20 0.23 0.33  
 0.24 0.28 0.16 0.32 0.16 0.20 0.29 0.34  
 Tb927.1.3830 glucose-6-phosphate isomerase, glycosomal 811223:813046  
 forward MW:67615

0.37 0.19 0.20 0.24 0.37 0.20 0.14 0.29  
 0.37 0.18 0.22 0.22 0.20 0.20 0.18 0.41  
 Tb927.1.3950 alanine aminotransferase, probable 835486:837195 forward  
 MW:63138  
 0.16 0.33 0.14 0.37 0.24 0.28 0.20 0.28  
 0.16 0.38 0.13 0.33 0.18 0.22 0.33 0.27  
 Tb927.1.4050 Ser/Thr protein phosphatase, probable 851315:854092  
 forward MW:105755  
 0.35 0.21 0.25 0.19 0.24 0.21 0.15 0.40  
 0.34 0.10 0.29 0.27 0.25 0.25 0.12 0.38  
 Tb927.1.4100 cytochrome C oxidase subunit IV, possible 856611:857672  
 forward MW:40534  
 0.41 0.18 0.21 0.19 0.39 0.15 0.20 0.25  
 0.30 0.20 0.25 0.25 0.33 0.26 0.15 0.26  
 Tb927.1.4420 ABC transporter, possible 907128:909965 forward  
 MW:104678  
 0.31 0.26 0.17 0.26 0.31 0.20 0.21 0.29  
 0.21 0.20 0.22 0.38 0.21 0.21 0.23 0.35  
 Tb927.1.4490 acetyltransferase, possible 923662:924180 forward MW:19682  
 0.37 0.15 0.20 0.29 0.32 0.17 0.12 0.39  
 0.19 0.24 0.20 0.37 0.17 0.21 0.21 0.40  
 Tb927.1.4690 arginine N-methyltransferase, probable 958990:960027  
 forward MW:39206  
 0.43 0.13 0.17 0.28 0.35 0.17 0.23 0.25  
 0.29 0.28 0.20 0.24 0.32 0.14 0.23 0.32  
 Tb927.1.4830 phospholipase A1, possible 981522:982424 forward MW:32404  
 0.34 0.12 0.21 0.33 0.35 0.21 0.13 0.31  
 0.27 0.17 0.20 0.36 0.21 0.23 0.13 0.43  
 Tb927.1.540 DNA-directed RNA polymerase III, probable 199222:202611  
 reverse MW:126584  
 0.25 0.24 0.21 0.30 0.29 0.09 0.26 0.35  
 0.30 0.23 0.19 0.28 0.28 0.11 0.23 0.38  
 Tb927.1.600 phosphate-repressible phosphate permease, possible  
 210968:212515 reverse MW:54701  
 0.39 0.20 0.17 0.24 0.39 0.19 0.17 0.25  
 0.36 0.27 0.14 0.23 0.34 0.17 0.15 0.35  
 Tb927.1.630 anti-silencing protein ASF 1 like protein, possible  
 214372:214887 reverse MW:19121  
 0.33 0.26 0.21 0.19 0.41 0.15 0.23 0.22  
 0.28 0.25 0.19 0.28 0.22 0.12 0.17 0.48

Tb927.1\_710 cPGK major cytosolic enzyme; expressed phosphoglycerate kinase

|      |      |      |      |      |      |      |      |
|------|------|------|------|------|------|------|------|
| 0.38 | 0.16 | 0.16 | 0.30 | 0.29 | 0.21 | 0.18 | 0.32 |
| 0.27 | 0.13 | 0.20 | 0.40 | 0.19 | 0.17 | 0.17 | 0.47 |

Tb927.1\_870 deoxyhypusine synthase, possible 257356:258384 reverse MW:37378

|      |      |      |      |      |      |      |      |
|------|------|------|------|------|------|------|------|
| 0.28 | 0.20 | 0.30 | 0.23 | 0.30 | 0.23 | 0.23 | 0.24 |
| 0.15 | 0.26 | 0.28 | 0.30 | 0.12 | 0.18 | 0.29 | 0.41 |

## Coding regions - Independent Test Set

|                                                                     |      |      |      |      |      |      |      |      |
|---------------------------------------------------------------------|------|------|------|------|------|------|------|------|
| 59.m00159 Cyclophilin                                               | 0.30 | 0.19 | 0.25 | 0.25 | 0.38 | 0.24 | 0.21 | 0.17 |
|                                                                     | 0.25 | 0.21 | 0.32 | 0.21 | 0.12 | 0.28 | 0.31 | 0.29 |
| 59.m00203 NIMA/Nek Serine/threonine-protein kinase family, putative | 0.29 | 0.21 | 0.24 | 0.26 | 0.34 | 0.19 | 0.28 | 0.18 |
|                                                                     | 0.29 | 0.25 | 0.25 | 0.22 | 0.17 | 0.23 | 0.32 | 0.28 |
| 59.m00204 Small GTP binding protein RAB6                            | 0.36 | 0.22 | 0.20 | 0.21 | 0.34 | 0.16 | 0.33 | 0.18 |
|                                                                     | 0.24 | 0.22 | 0.32 | 0.22 | 0.17 | 0.20 | 0.31 | 0.32 |
| 59.m00209 Ribosomal RNA processing protein RRP41B                   | 0.26 | 0.24 | 0.24 | 0.26 | 0.29 | 0.20 | 0.34 | 0.17 |
|                                                                     | 0.22 | 0.27 | 0.27 | 0.23 | 0.12 | 0.24 | 0.33 | 0.31 |
| 59.m00210 Histone deacetylase, putative                             | 0.31 | 0.22 | 0.24 | 0.22 | 0.27 | 0.23 | 0.28 | 0.23 |
|                                                                     | 0.29 | 0.23 | 0.25 | 0.22 | 0.15 | 0.23 | 0.38 | 0.24 |
| 59.m00215 Exportin (tRNA), putative                                 | 0.24 | 0.25 | 0.26 | 0.25 | 0.31 | 0.18 | 0.26 | 0.25 |
|                                                                     | 0.23 | 0.31 | 0.22 | 0.25 | 0.18 | 0.24 | 0.32 | 0.26 |
| 59.m00217 Phosphatidylinositol 3-kinase, putative                   | 0.25 | 0.27 | 0.27 | 0.21 | 0.30 | 0.21 | 0.25 | 0.24 |
|                                                                     | 0.23 | 0.30 | 0.24 | 0.24 | 0.14 | 0.24 | 0.34 | 0.28 |
| 59.m00235 Proteasome regulatory non-ATPase subunit 6 (RPN6)         | 0.27 | 0.21 | 0.31 | 0.21 | 0.30 | 0.15 | 0.29 | 0.26 |
|                                                                     | 0.30 | 0.32 | 0.23 | 0.15 | 0.13 | 0.25 | 0.36 | 0.25 |
| 59.m00236 Methyltransferase                                         | 0.27 | 0.23 | 0.25 | 0.25 | 0.28 | 0.20 | 0.33 | 0.19 |
|                                                                     | 0.25 | 0.31 | 0.21 | 0.23 | 0.18 | 0.22 | 0.37 | 0.22 |
| 59.m00237 Ubiquitin-conjugating enzyme E2                           | 0.31 | 0.25 | 0.29 | 0.15 | 0.27 | 0.26 | 0.25 | 0.21 |
|                                                                     | 0.24 | 0.27 | 0.29 | 0.20 | 0.20 | 0.24 | 0.28 | 0.28 |
| 59.m00238 RNA-editing complex protein MP81                          | 0.31 | 0.25 | 0.27 | 0.18 | 0.29 | 0.25 | 0.27 | 0.19 |
|                                                                     | 0.24 | 0.29 | 0.26 | 0.21 | 0.15 | 0.25 | 0.36 | 0.25 |
| 59.m00258 Histone H4                                                | 0.35 | 0.23 | 0.26 | 0.16 | 0.28 | 0.20 | 0.39 | 0.13 |
|                                                                     | 0.20 | 0.28 | 0.30 | 0.22 | 0.14 | 0.30 | 0.32 | 0.23 |
| 59.m00263 Protein kinase, putative                                  |      |      |      |      |      |      |      |      |

|           |                                                                 |      |      |      |      |      |      |
|-----------|-----------------------------------------------------------------|------|------|------|------|------|------|
| 0.26      | 0.22                                                            | 0.26 | 0.25 | 0.29 | 0.24 | 0.26 | 0.22 |
| 0.24      | 0.23                                                            | 0.28 | 0.25 | 0.16 | 0.25 | 0.34 | 0.25 |
| 59.m00281 | Actin-related protein, ARP2/3 complex subunit                   |      |      |      |      |      |      |
| 0.30      | 0.21                                                            | 0.23 | 0.26 | 0.34 | 0.17 | 0.24 | 0.25 |
| 0.35      | 0.23                                                            | 0.21 | 0.21 | 0.23 | 0.20 | 0.25 | 0.32 |
| 59.m00299 | Fatty acid desaturase                                           |      |      |      |      |      |      |
| 0.20      | 0.23                                                            | 0.22 | 0.36 | 0.34 | 0.20 | 0.22 | 0.24 |
| 0.20      | 0.26                                                            | 0.26 | 0.28 | 0.16 | 0.21 | 0.32 | 0.31 |
| 59.m00349 | Transcription elongation factor S-II, putative                  |      |      |      |      |      |      |
| 0.35      | 0.23                                                            | 0.27 | 0.16 | 0.33 | 0.19 | 0.27 | 0.21 |
| 0.30      | 0.23                                                            | 0.30 | 0.17 | 0.19 | 0.23 | 0.30 | 0.28 |
| 59.m00353 | GTP-binding elongation factor Tu family, putative               |      |      |      |      |      |      |
| 0.31      | 0.21                                                            | 0.27 | 0.21 | 0.32 | 0.19 | 0.27 | 0.21 |
| 0.24      | 0.24                                                            | 0.26 | 0.26 | 0.17 | 0.23 | 0.33 | 0.27 |
| 59.m00363 | Ubiquitin-conjugating enzyme, putative                          |      |      |      |      |      |      |
| 0.31      | 0.15                                                            | 0.24 | 0.30 | 0.41 | 0.18 | 0.22 | 0.18 |
| 0.29      | 0.24                                                            | 0.31 | 0.16 | 0.16 | 0.22 | 0.34 | 0.28 |
| 59.m00369 | Translation initiation factor IF-2, putative                    |      |      |      |      |      |      |
| 0.32      | 0.20                                                            | 0.27 | 0.21 | 0.30 | 0.20 | 0.30 | 0.19 |
| 0.32      | 0.23                                                            | 0.25 | 0.19 | 0.15 | 0.25 | 0.33 | 0.27 |
| 59.m00379 | Ribonucleoprotein F, putative                                   |      |      |      |      |      |      |
| 0.25      | 0.20                                                            | 0.26 | 0.29 | 0.33 | 0.25 | 0.26 | 0.16 |
| 0.25      | 0.26                                                            | 0.28 | 0.21 | 0.15 | 0.24 | 0.31 | 0.29 |
| 59.m00382 | Beta-ketoacyl synthase family protein                           |      |      |      |      |      |      |
| 0.22      | 0.28                                                            | 0.23 | 0.27 | 0.28 | 0.22 | 0.29 | 0.21 |
| 0.19      | 0.29                                                            | 0.26 | 0.26 | 0.12 | 0.24 | 0.35 | 0.29 |
| 59.m00384 | MCM family protein                                              |      |      |      |      |      |      |
| 0.26      | 0.26                                                            | 0.24 | 0.23 | 0.30 | 0.20 | 0.26 | 0.24 |
| 0.23      | 0.27                                                            | 0.28 | 0.22 | 0.17 | 0.23 | 0.31 | 0.28 |
| 59.m00393 | Amyloid precursor protein-binding protein 1 (APP-BP1), putative |      |      |      |      |      |      |
| 0.25      | 0.24                                                            | 0.23 | 0.28 | 0.26 | 0.21 | 0.27 | 0.27 |
| 0.26      | 0.24                                                            | 0.25 | 0.25 | 0.19 | 0.18 | 0.35 | 0.28 |
| 59.m00397 | Dynein intermediate chain, putative                             |      |      |      |      |      |      |
| 0.29      | 0.24                                                            | 0.27 | 0.20 | 0.28 | 0.21 | 0.29 | 0.21 |
| 0.27      | 0.24                                                            | 0.25 | 0.25 | 0.15 | 0.29 | 0.34 | 0.22 |
| 59.m00402 | Mitochondrial processing peptidase alpha subunit, putative      |      |      |      |      |      |      |
| 0.31      | 0.24                                                            | 0.22 | 0.24 | 0.33 | 0.20 | 0.24 | 0.22 |
| 0.25      | 0.25                                                            | 0.25 | 0.25 | 0.20 | 0.21 | 0.32 | 0.28 |

59.m00404 Enoyl-CoA hydratase/Enoyl-CoA isomerase/3-hydroxyacyl-CoA dehydrogenase, putative  
0.23 0.22 0.26 0.29 0.30 0.22 0.26 0.22  
0.24 0.25 0.26 0.25 0.15 0.20 0.33 0.32

59.m00412 Glycosomal phosphoenolpyruvate carboxykinase  
0.29 0.30 0.21 0.21 0.22 0.25 0.29 0.25  
0.28 0.30 0.23 0.19 0.14 0.20 0.39 0.27

59.m00415 GTP binding protein, putative  
0.30 0.21 0.21 0.27 0.29 0.18 0.27 0.26  
0.27 0.31 0.25 0.17 0.17 0.21 0.35 0.27

59.m00419 Dual specificity phosphatase (MKP), putative  
0.27 0.21 0.26 0.25 0.27 0.24 0.26 0.24  
0.26 0.27 0.25 0.23 0.18 0.24 0.31 0.27

59.m00424 Paraflagellar rod protein, putative  
0.31 0.22 0.26 0.22 0.32 0.16 0.26 0.25  
0.32 0.26 0.21 0.21 0.19 0.26 0.29 0.26

59.m00428 Trypanothione synthetase  
0.29 0.25 0.24 0.23 0.30 0.21 0.27 0.22  
0.28 0.22 0.27 0.23 0.15 0.21 0.32 0.31

59.m00430 Endo/exonuclease Mre11, putative  
0.27 0.22 0.24 0.26 0.28 0.26 0.25 0.21  
0.28 0.22 0.27 0.23 0.14 0.25 0.34 0.27

59.m00445 Small nuclear ribonucleoprotein protein, putative  
0.33 0.23 0.25 0.20 0.37 0.14 0.26 0.23  
0.34 0.23 0.24 0.20 0.19 0.17 0.40 0.24

59.m00446 FtsJ cell division protein, putative  
0.31 0.22 0.29 0.18 0.28 0.21 0.31 0.20  
0.31 0.24 0.23 0.22 0.16 0.20 0.38 0.26

59.m00450 Branched-chain amino acid aminotransferase  
0.25 0.27 0.23 0.26 0.25 0.21 0.23 0.31  
0.24 0.27 0.27 0.23 0.13 0.20 0.39 0.27

59.m00462 RNA-binding protein, putative  
0.26 0.28 0.26 0.19 0.24 0.23 0.38 0.16  
0.26 0.23 0.30 0.21 0.14 0.24 0.36 0.25

59.m00478 Dual specificity protein phosphatase, putative  
0.27 0.18 0.23 0.32 0.30 0.23 0.24 0.24  
0.21 0.28 0.24 0.26 0.18 0.19 0.33 0.31

59.m00484 Esterase, putative

|                                                                |      |      |      |      |      |      |      |
|----------------------------------------------------------------|------|------|------|------|------|------|------|
| 0.27                                                           | 0.29 | 0.20 | 0.24 | 0.27 | 0.22 | 0.29 | 0.22 |
| 0.25                                                           | 0.22 | 0.24 | 0.29 | 0.12 | 0.23 | 0.35 | 0.30 |
| 59.m00493 Acyl-CoA oxidase, putative                           |      |      |      |      |      |      |      |
| 0.28                                                           | 0.25 | 0.24 | 0.23 | 0.26 | 0.25 | 0.25 | 0.24 |
| 0.25                                                           | 0.26 | 0.27 | 0.22 | 0.14 | 0.22 | 0.32 | 0.32 |
| 59.m00494 Transcription initiation protein, putative           |      |      |      |      |      |      |      |
| 0.29                                                           | 0.22 | 0.26 | 0.23 | 0.25 | 0.21 | 0.30 | 0.25 |
| 0.27                                                           | 0.22 | 0.26 | 0.24 | 0.18 | 0.24 | 0.33 | 0.25 |
| 59.m00496 Protein phosphatase 2C, putative                     |      |      |      |      |      |      |      |
| 0.27                                                           | 0.15 | 0.26 | 0.31 | 0.26 | 0.18 | 0.29 | 0.27 |
| 0.28                                                           | 0.23 | 0.27 | 0.21 | 0.19 | 0.21 | 0.29 | 0.31 |
| 59.m00503 Vesicle-associated membrane protein (VAMP), putative |      |      |      |      |      |      |      |
| 0.32                                                           | 0.17 | 0.20 | 0.31 | 0.31 | 0.14 | 0.28 | 0.28 |
| 0.24                                                           | 0.22 | 0.18 | 0.35 | 0.19 | 0.17 | 0.28 | 0.36 |
| 59.m00506 TPR-repeat protein, putative                         |      |      |      |      |      |      |      |
| 0.31                                                           | 0.21 | 0.32 | 0.16 | 0.28 | 0.22 | 0.25 | 0.25 |
| 0.35                                                           | 0.20 | 0.23 | 0.22 | 0.16 | 0.18 | 0.36 | 0.30 |
| 59.m00509 Aldo-keto reductase, putative                        |      |      |      |      |      |      |      |
| 0.27                                                           | 0.28 | 0.22 | 0.23 | 0.25 | 0.24 | 0.23 | 0.28 |
| 0.26                                                           | 0.24 | 0.29 | 0.21 | 0.18 | 0.24 | 0.35 | 0.23 |
| 59.m00512 3-oxoacyl-(acyl-carrier protein) reductase, putative |      |      |      |      |      |      |      |
| 0.25                                                           | 0.25 | 0.27 | 0.23 | 0.31 | 0.17 | 0.30 | 0.22 |
| 0.17                                                           | 0.25 | 0.29 | 0.28 | 0.14 | 0.25 | 0.37 | 0.23 |
| 59.m00514 Protein kinase, putative                             |      |      |      |      |      |      |      |
| 0.26                                                           | 0.25 | 0.28 | 0.21 | 0.26 | 0.27 | 0.26 | 0.20 |
| 0.22                                                           | 0.24 | 0.28 | 0.25 | 0.20 | 0.21 | 0.34 | 0.24 |
| 59.m00515 Cell cycle control protein (CWF8), putative          |      |      |      |      |      |      |      |
| 0.22                                                           | 0.28 | 0.29 | 0.21 | 0.31 | 0.16 | 0.31 | 0.22 |
| 0.20                                                           | 0.26 | 0.29 | 0.24 | 0.13 | 0.22 | 0.40 | 0.25 |
| 59.m00516 Tubulin-tyrosine ligase, putative                    |      |      |      |      |      |      |      |
| 0.23                                                           | 0.23 | 0.31 | 0.23 | 0.26 | 0.21 | 0.32 | 0.21 |
| 0.28                                                           | 0.24 | 0.25 | 0.23 | 0.17 | 0.22 | 0.33 | 0.28 |
| 59.m00518 Dynein heavy chain, putative                         |      |      |      |      |      |      |      |
| 0.28                                                           | 0.24 | 0.27 | 0.21 | 0.28 | 0.20 | 0.26 | 0.25 |
| 0.29                                                           | 0.26 | 0.24 | 0.22 | 0.17 | 0.23 | 0.33 | 0.26 |
| 59.m00557 Adenylate kinase                                     |      |      |      |      |      |      |      |
| 0.27                                                           | 0.21 | 0.27 | 0.25 | 0.29 | 0.23 | 0.31 | 0.17 |
| 0.25                                                           | 0.31 | 0.25 | 0.19 | 0.16 | 0.23 | 0.36 | 0.25 |
| 59.m00566 Tyrosyl-DNA Phosphodiesterase (Tdp1), putative       |      |      |      |      |      |      |      |



|                                                                     |      |      |      |      |      |      |      |
|---------------------------------------------------------------------|------|------|------|------|------|------|------|
| 0.30                                                                | 0.21 | 0.23 | 0.26 | 0.24 | 0.23 | 0.26 | 0.27 |
| 0.26                                                                | 0.21 | 0.30 | 0.24 | 0.21 | 0.22 | 0.30 | 0.26 |
| 59.m00571 Sedoheptulose-1,7-bisphosphatase                          |      |      |      |      |      |      |      |
| 0.26                                                                | 0.25 | 0.20 | 0.29 | 0.27 | 0.21 | 0.33 | 0.19 |
| 0.19                                                                | 0.25 | 0.28 | 0.28 | 0.18 | 0.16 | 0.41 | 0.24 |
| 59.m00576 Small nuclear ribonucleoprotein Sm D2                     |      |      |      |      |      |      |      |
| 0.33                                                                | 0.24 | 0.27 | 0.16 | 0.28 | 0.23 | 0.28 | 0.22 |
| 0.24                                                                | 0.25 | 0.18 | 0.34 | 0.09 | 0.33 | 0.36 | 0.23 |
| 59.m00589 Heat shock protein 100 (clp protein)                      |      |      |      |      |      |      |      |
| 0.27                                                                | 0.25 | 0.25 | 0.23 | 0.28 | 0.20 | 0.30 | 0.23 |
| 0.29                                                                | 0.25 | 0.24 | 0.21 | 0.11 | 0.21 | 0.40 | 0.27 |
| 59.m00591 Glycosylphosphatidylinositol-specific phospholipase C     |      |      |      |      |      |      |      |
| 0.29                                                                | 0.23 | 0.19 | 0.29 | 0.34 | 0.21 | 0.24 | 0.21 |
| 0.28                                                                | 0.21 | 0.23 | 0.29 | 0.18 | 0.18 | 0.28 | 0.36 |
| 59.m00596 Beta prime COP protein                                    |      |      |      |      |      |      |      |
| 0.27                                                                | 0.25 | 0.20 | 0.28 | 0.30 | 0.19 | 0.28 | 0.23 |
| 0.25                                                                | 0.21 | 0.28 | 0.26 | 0.15 | 0.17 | 0.36 | 0.32 |
| 59.m00600 Ribosomal protein L44                                     |      |      |      |      |      |      |      |
| 0.46                                                                | 0.17 | 0.23 | 0.14 | 0.39 | 0.21 | 0.19 | 0.21 |
| 0.30                                                                | 0.26 | 0.18 | 0.27 | 0.21 | 0.15 | 0.32 | 0.32 |
| 59.m00606 Nucleoside transporter family protein                     |      |      |      |      |      |      |      |
| 0.25                                                                | 0.17 | 0.19 | 0.39 | 0.30 | 0.21 | 0.16 | 0.34 |
| 0.25                                                                | 0.23 | 0.25 | 0.27 | 0.13 | 0.19 | 0.32 | 0.36 |
| 59.m00609 Iron/ascorbate oxidoreductase family protein, putative    |      |      |      |      |      |      |      |
| 0.28                                                                | 0.20 | 0.23 | 0.29 | 0.28 | 0.28 | 0.20 | 0.24 |
| 0.29                                                                | 0.23 | 0.29 | 0.19 | 0.16 | 0.20 | 0.32 | 0.31 |
| Tb927.1.1000 developmentally regulated phosphoprotein 284697:285959 |      |      |      |      |      |      |      |
| forward MW:47207                                                    |      |      |      |      |      |      |      |
| 0.28                                                                | 0.21 | 0.25 | 0.26 | 0.33 | 0.19 | 0.21 | 0.28 |
| 0.30                                                                | 0.20 | 0.24 | 0.27 | 0.15 | 0.25 | 0.29 | 0.30 |
| Tb927.1.1130 glycerol-3-phosphate dehydrogenase (FAD-dependent),    |      |      |      |      |      |      |      |
| possible 308784:310637 forward MW:66175                             |      |      |      |      |      |      |      |
| 0.22                                                                | 0.26 | 0.28 | 0.24 | 0.25 | 0.19 | 0.30 | 0.26 |
| 0.21                                                                | 0.28 | 0.25 | 0.26 | 0.14 | 0.23 | 0.36 | 0.28 |
| Tb927.1.1150 zeta tubulin 312633:314075 forward MW:52705            |      |      |      |      |      |      |      |
| 0.26                                                                | 0.26 | 0.25 | 0.23 | 0.26 | 0.19 | 0.26 | 0.28 |
| 0.25                                                                | 0.25 | 0.25 | 0.25 | 0.14 | 0.25 | 0.35 | 0.27 |
| Tb927.1.1230 chaperone protein DNAJ, probable 322467:323909 forward |      |      |      |      |      |      |      |
| MW:52354                                                            |      |      |      |      |      |      |      |

0.27 0.26 0.21 0.27 0.28 0.21 0.27 0.24  
 0.20 0.28 0.27 0.26 0.17 0.23 0.35 0.25  
 Tb927.1.1240 cytidine triphosphate synthase, probable 325093:326862  
 forward MW:65213  
 0.29 0.23 0.24 0.25 0.31 0.21 0.23 0.24  
 0.25 0.23 0.24 0.28 0.16 0.19 0.35 0.30  
 Tb927.1.1270 homocysteine S-methyltransferase, possible 329491:330792  
 forward MW:48278  
 0.33 0.19 0.17 0.31 0.34 0.19 0.25 0.23  
 0.28 0.19 0.30 0.23 0.17 0.18 0.32 0.33  
 Tb927.1.1350 kinesin heavy chain isoform 5c, probable 340589:343249  
 forward MW:96582  
 0.28 0.24 0.27 0.22 0.32 0.21 0.27 0.20  
 0.27 0.24 0.25 0.25 0.17 0.21 0.34 0.28  
 Tb927.1.1380 serine/threonine protein phosphatase 2a, probable  
 348045:349766 forward MW:62616  
 0.24 0.24 0.28 0.23 0.26 0.20 0.28 0.26  
 0.23 0.30 0.22 0.26 0.16 0.21 0.37 0.26  
 Tb927.1.1530 protein kinase, possible 380514:385742 forward MW:191481  
 0.30 0.21 0.25 0.25 0.32 0.19 0.26 0.22  
 0.28 0.22 0.25 0.25 0.18 0.20 0.32 0.30  
 Tb927.1.1560 vesicular-fusion protein NsF, possible 394480:396657 forward  
 MW:79955  
 0.34 0.19 0.22 0.25 0.33 0.20 0.25 0.23  
 0.26 0.23 0.25 0.26 0.16 0.20 0.36 0.28  
 Tb927.1.1580 cytochrome c oxidase assembly factor, possible 398579:399484  
 forward MW:33578  
 0.28 0.22 0.23 0.27 0.26 0.17 0.33 0.24  
 0.29 0.19 0.30 0.22 0.15 0.22 0.30 0.33  
 Tb927.1.1620 ATP-dependent RNA helicase, probable 407764:409983  
 forward MW:81819  
 0.30 0.25 0.24 0.21 0.27 0.21 0.27 0.25  
 0.26 0.22 0.29 0.23 0.16 0.25 0.34 0.25  
 Tb927.1.1770 glutaredoxin, possible 461717:462040 forward MW:12152  
 0.36 0.22 0.13 0.29 0.36 0.20 0.26 0.18  
 0.23 0.20 0.28 0.29 0.15 0.14 0.35 0.35  
 Tb927.1.1930 phosphatidylinositol 3-kinase, probable 496357:505068  
 forward MW:324220  
 0.26 0.26 0.26 0.22 0.31 0.21 0.27 0.22  
 0.24 0.28 0.24 0.24 0.18 0.24 0.34 0.24

Tb927.1.1960 DNAJ-like protein, possible 508843:510819 forward  
MW:75712  
0.33 0.23 0.29 0.16 0.29 0.20 0.34 0.18  
0.32 0.25 0.26 0.16 0.17 0.20 0.36 0.27

Tb927.1.2100 calpain-like protein, probable 526387:529827 forward  
MW:126155  
0.31 0.19 0.29 0.22 0.29 0.26 0.22 0.23  
0.30 0.25 0.26 0.19 0.13 0.27 0.40 0.19

Tb927.1.2330 beta tubulin 565286:566614 forward MW:49704  
0.20 0.32 0.27 0.22 0.26 0.25 0.23 0.26  
0.27 0.27 0.23 0.23 0.10 0.33 0.42 0.16

Tb927.1.2340 alpha tubulin 567246:568601 forward MW:49787  
0.18 0.34 0.27 0.21 0.26 0.24 0.25 0.25  
0.24 0.29 0.23 0.24 0.10 0.30 0.43 0.17

Tb927.1.2430 histone H3, probable 586961:587701 forward MW:27684  
0.32 0.29 0.20 0.18 0.27 0.30 0.15 0.27  
0.22 0.38 0.19 0.21 0.13 0.31 0.22 0.34

Tb927.1.2570 beta-coP coatomer beta subunit  
0.28 0.22 0.25 0.24 0.31 0.18 0.28 0.23  
0.28 0.23 0.24 0.25 0.16 0.22 0.34 0.27

Tb927.1.2600 RNA-binding regulatory protein (pumilio family), possible  
604834:606837 forward MW:74066  
0.25 0.29 0.23 0.22 0.34 0.27 0.23 0.17  
0.22 0.40 0.19 0.20 0.17 0.28 0.34 0.22

Tb927.1.2670 axoneme central apparatus protein, possible 613733:615274  
forward MW:56126  
0.29 0.24 0.25 0.23 0.37 0.19 0.24 0.19  
0.20 0.31 0.25 0.23 0.17 0.21 0.33 0.29

Tb927.1.2820 pteridine transporter, possible 636083:638041 reverse  
MW:70809  
0.22 0.24 0.25 0.29 0.23 0.23 0.24 0.31  
0.21 0.23 0.28 0.28 0.11 0.26 0.36 0.27

Tb927.1.3000 aminoacylase, probable 661811:663019 forward MW:42938  
0.26 0.25 0.26 0.23 0.33 0.21 0.25 0.22  
0.21 0.27 0.27 0.25 0.19 0.20 0.38 0.22

Tb927.1.3030 MP48, TbREL2 targeted to the mitochondrion by the first 17  
amino TBMP48 (RNA editing ligase)  
0.28 0.23 0.27 0.23 0.27 0.22 0.26 0.24  
0.32 0.24 0.23 0.20 0.18 0.25 0.30 0.26

Tb927.1.3110 soluble N-ethylmaleimide sensitive factor (NSF) attachment

protein, possible 672570:673415 forward MW:32136  
 0.31 0.23 0.29 0.16 0.23 0.16 0.37 0.24  
 0.34 0.29 0.20 0.17 0.20 0.19 0.37 0.25  
 Tb927.1.3120 separin (C50 family cysteine protease), probable  
 673957:677436 forward MW:126338  
 0.25 0.26 0.26 0.23 0.27 0.20 0.28 0.24  
 0.22 0.29 0.27 0.22 0.12 0.25 0.36 0.26  
 Tb927.1.3200 phosphatase-like protein, possible 684959:685624 forward  
 MW:24493  
 0.32 0.30 0.25 0.13 0.26 0.30 0.28 0.16  
 0.29 0.29 0.23 0.19 0.14 0.27 0.36 0.23  
 Tb927.1.3230 cell division cycle protein, possible 689122:691269 forward  
 MW:77315  
 0.23 0.28 0.29 0.21 0.25 0.24 0.27 0.24  
 0.23 0.27 0.27 0.23 0.13 0.24 0.40 0.24  
 Tb927.1.3300 Zinc-binding phosphatase, possible 712788:715406 forward  
 MW:97545  
 0.30 0.24 0.24 0.22 0.31 0.22 0.27 0.20  
 0.23 0.28 0.26 0.22 0.16 0.21 0.35 0.28  
 Tb927.1.3820 ATP synthase subunit, probable 810552:810953 forward  
 MW:14198  
 0.30 0.23 0.22 0.25 0.37 0.17 0.23 0.23  
 0.27 0.24 0.30 0.19 0.24 0.28 0.27 0.21  
 Tb927.1.3830 glucose-6-phosphate isomerase, glycosomal 811223:813046  
 forward MW:67615  
 0.30 0.22 0.23 0.25 0.32 0.21 0.23 0.24  
 0.27 0.22 0.30 0.22 0.15 0.24 0.28 0.32  
 Tb927.1.3950 alanine aminotransferase, probable 835486:837195 forward  
 MW:63138  
 0.26 0.28 0.26 0.21 0.26 0.24 0.29 0.21  
 0.25 0.28 0.23 0.23 0.16 0.22 0.35 0.28  
 Tb927.1.4050 Ser/Thr protein phosphatase, probable 851315:854092  
 forward MW:105755  
 0.24 0.25 0.26 0.25 0.28 0.21 0.26 0.25  
 0.25 0.26 0.26 0.23 0.15 0.27 0.32 0.25  
 Tb927.1.4100 cytochrome C oxidase subunit IV, possible 856611:857672  
 forward MW:40534  
 0.24 0.25 0.26 0.25 0.28 0.20 0.32 0.20  
 0.30 0.30 0.21 0.20 0.15 0.22 0.40 0.24  
 Tb927.1.4420 ABC transporter, possible 907128:909965 forward

MW:104678  
 0.21 0.31 0.26 0.22 0.25 0.20 0.30 0.25  
 0.23 0.25 0.27 0.25 0.16 0.20 0.36 0.28  
 Tb927.1.4490 acetyltransferase, possible 923662:924180 forward MW:19682  
 0.36 0.19 0.20 0.26 0.25 0.23 0.33 0.19  
 0.30 0.23 0.28 0.20 0.15 0.25 0.30 0.30  
 Tb927.1.4690 arginine N-methyltransferase, probable 958990:960027  
 forward MW:39206  
 0.25 0.24 0.19 0.32 0.34 0.19 0.24 0.23  
 0.28 0.24 0.26 0.22 0.19 0.16 0.29 0.36  
 Tb927.1.4830 phospholipase A1, possible 981522:982424 forward MW:32404  
 0.34 0.17 0.18 0.30 0.33 0.19 0.23 0.25  
 0.25 0.24 0.24 0.27 0.14 0.20 0.28 0.39  
 Tb927.1.540 DNA-directed RNA polymerase III, probable 199222:202611  
 reverse MW:126584  
 0.29 0.21 0.23 0.27 0.31 0.23 0.25 0.22  
 0.26 0.23 0.27 0.25 0.18 0.21 0.31 0.30  
 Tb927.1.600 phosphate-repressible phosphate permease, possible  
 210968:212515 reverse MW:54701  
 0.23 0.21 0.18 0.38 0.25 0.23 0.24 0.28  
 0.21 0.25 0.25 0.29 0.15 0.20 0.36 0.28  
 Tb927.1.630 anti-silencing protein ASF 1 like protein, possible  
 214372:214887 reverse MW:19121  
 0.20 0.29 0.26 0.26 0.33 0.24 0.22 0.21  
 0.30 0.20 0.30 0.20 0.20 0.20 0.32 0.28  
 Tb927.1.710 cPGK major cytosolic enzyme; expressed phosphoglycerate  
 kinase  
 0.31 0.17 0.26 0.27 0.31 0.20 0.23 0.25  
 0.29 0.23 0.26 0.22 0.15 0.24 0.34 0.27  
 Tb927.1.870 deoxyhypusine synthase, possible 257356:258384 reverse  
 MW:37378  
 0.27 0.24 0.19 0.29 0.27 0.20 0.28 0.25  
 0.25 0.23 0.29 0.24 0.16 0.18 0.36 0.31

## 2 Primer Sequences

We had two sets of primers: those used for data generation by RT-PCR and subsequent sequencing (for sequences that yielded data for the training set) and primers used to test predictions on Chromosome I. For each primer, the sequence is listed in the 5' to 3' direction. All reactions used a common 5' primer derived from the spliced leader sequence:

TAGAACAGTTTCTGTACTATATTG

### Primers for Data Generation

The primers used for generating upstream regions by RT-PCR and subsequent sequencing are listed below. Each 3' primer contains a T7 specific primer to facilitate sequencing.

AC007862.6\_329 3' primer

GTAATACGACTCACTATAGGGCCACACAAAGTTCCCCGTTG

AC007863.14\_280 3' primer

GTAATACGACTCACTATAGGGCCATCAATCTCATTCCCGAGG

AC007866.10\_029 3' primer

GTAATACGACTCACTATAGGGCTCTGACCACCATAACCGGAC

AC012647.17\_195 3' primer

GTAATACGACTCACTATAGGGCAACACTGTGACCCTCCTTGG

AC013485.2\_081 3' primer

GTAATACGACTCACTATAGGGCAGCATTCCAGGGTTAGCTCC

AC091701.2\_137 3' primer

GTAATACGACTCACTATAGGGCATCGTTAGATTCCGCCCAG

AC091701.2\_185 3' primer

GTAATACGACTCACTATAGGGCCGTTTCATGCTGATGTCCTTG

AF008186 3' primer

GTAATACGACTCACTATAGGGCTGTAATCCGTCTTGTCACGG

AF011787 3' primer

GTAATACGACTCACTATAGGGCGATGTACAGCGAAGTGCGAG

AF020696 3' primer

GTAATACGACTCACTATAGGGCAGGCTTTGCAGCAGACTTTG

AF027739 3' primer

GTAATACGACTCACTATAGGGCCTGGAGAACAAATGTGCGAG

AF031926\_1 3' primer  
GTAATACGACTCACTATAGGGCTTCACTCCGTTTAACCCACC  
AF031926\_2 3' primer  
GTAATACGACTCACTATAGGGCACTGGCTTTGTCTGGATGG  
AF078916 3' primer  
GTAATACGACTCACTATAGGGGCGACCACGTTTCAGTTTGCATC  
AF079110 3' primer  
GTAATACGACTCACTATAGGGCCAGCATATTTGACGGTGACG  
AF119091 3' primer  
GTAATACGACTCACTATAGGGCTCCCTTCACCTTGAGGACAT  
AJ005114 3' primer  
GTAATACGACTCACTATAGGGCCATACGAAGGAGACAACGGG  
J04124 3' primer  
GTAATACGACTCACTATAGGGCCGTAACCTTTTCAGGGGCATC  
J04841 3' primer  
GTAATACGACTCACTATAGGGCGCACTTCATTCACCTTGTGC  
L10721 3' primer  
GTAATACGACTCACTATAGGGCCCAGAGGATTTTCAAGTGGC  
M20570 3' primer  
GTAATACGACTCACTATAGGGCGTTGGGAGTCCTTTTCAAGC  
M36124 3' primer  
GTAATACGACTCACTATAGGGCCGCGATCTGCTTTTACCTTC  
U10562 3' primer  
GTAATACGACTCACTATAGGGCCCATGCGTACTTGAATGAGG  
U20092 3' primer  
GTAATACGACTCACTATAGGGCACATCGTCATCGTGTGCAAG  
U26666 3' primer  
GTAATACGACTCACTATAGGGCCAAACGTGAAGTCGAGAGG  
U28866 3' primer  
GTAATACGACTCACTATAGGGCTCGGAGTATTTGGCGTATCG  
U29199 3' primer  
GTAATACGACTCACTATAGGGCGAGAAACATTCCCCCAGTC  
U43702 3' primer  
GTAATACGACTCACTATAGGGCTACCAAGGAAGGCAAAGGC  
U52964 3' primer  
GTAATACGACTCACTATAGGGCGGTCCCTCACTGCTTTTCATCG

## Primers for Experimental Verification

The primers used for experimentally validating the LDA method are listed below. Each of these primers was designed to be within 200 - 300 nucleotides of the start of the coding region as identified by the Sanger Institute.

Tb927\_1\_1130 3' primer  
AGGAAAGGAAATGACACCGC  
Tb927\_1\_1150 3' primer  
ATAACGCAACGAGCCTTCC  
Tb927\_1\_1220 3' primer  
ACGACCGAATATGTTGGAGG  
Tb927\_1\_1230 3' primer  
CCTCATTGTCACCAGCAAAG  
Tb927\_1\_1240 3' primer  
GCATACCCCACCAGTAACCA  
Tb927\_1\_1270 3' primer  
CATCTTCCACCAATGTCCC  
Tb927\_1\_1350 3' primer  
TGAAGCCATCTCCACCTACC  
Tb927\_1\_1380 3' primer  
ACTCTTCACGGGTTTCGTTCA  
Tb927\_1\_140 3' primer  
CCACGACATTTAACCACGTC  
Tb927\_1\_1410 3' primer  
CCGTATTTTCGTGTAAGCGG  
Tb927\_1\_1430 3' primer  
GTAACGAAGTGAAGGGTGCG  
Tb927\_1\_150 3' primer  
GCTCCAACCCTCATCAAATC  
Tb927\_1\_1510 3' primer  
GGAGATGGAGATGGAGATGG  
Tb927\_1\_1580 3' primer  
GAACCGAAAAGAAACCACCC  
Tb927\_1\_1620 3' primer  
GTGAGGCAAACATCCATCG



Tb927\_1.1730 3' primer  
TTAGACTCTCTTCGCCAGCC  
Tb927\_1.1740 3' primer  
GCAATCGTTGTCTCCTCCTT  
Tb927\_1.1770 3' primer  
ACTGACAATACGTGGCGGAC  
Tb927\_1.1800 3' primer  
GGGTAAACTCCTCCTCGCTT  
Tb927\_1.2000 3' primer  
AACACATAAGTCGCTCCCGT  
Tb927\_1.2150 3' primer  
TACCGTCAGCTTCATCCACA  
Tb927\_1.2210 3' primer  
CCTCATGCATTTTCATCCTCC  
Tb927\_1.2310 3' primer  
CAACAACAACCAAGCACACC  
Tb927\_1.2430 3' primer  
ACAAAAGGGTGAGAGGAGGC  
Tb927\_1.2620 3' primer  
CCCCGCCTTAACAAGAAAGA  
Tb927\_1.2630 3' primer  
CAATCGCGTATTCGTGTCTC  
Tb927\_1.3070 3' primer  
GTGGGTGGCTGTTTTTCATC  
Tb927\_1.3330 3' primer  
AATGTTCTCCTGCTTCCCGT  
Tb927\_1.3410 3' primer  
GAGCACAGATGCGGAAAAGA  
Tb927\_1.3460 3' primer  
GCACCAGAGGAAAAGAAGAAGG  
Tb927\_1.3480 3' primer  
GGTAACTGTGTTTGCCCTGCG  
Tb927\_1.4020 3' primer  
CAGAGACACACGCAGAGGAA  
Tb927\_1.4030 3' primer  
AGTAAAACGGCATGAGGTGC

Tb927\_1.4120 3' primer  
CGAAAAACAAGGAGGAGG  
Tb927\_1.4130 3' primer  
ATTCGGACGGTAAACAGCAG  
Tb927\_1.4500 3' primer  
AAAGAAGAGGGAGCGGAATG  
Tb927\_1.4570 3' primer  
CGAAAAGAACAAGGGAGAGG  
Tb927\_1.4590 3' primer  
TTGCCAAGGACAATCCTC  
Tb927\_1.4620 3' primer  
CGAAAAGAACAAGGGAGAGG  
Tb927\_1.4790 3' primer  
AAAATCCAGAGACCACGGC  
Tb927\_1.4830 3' primer  
GGAAGATGTCCTTCACCACC  
Tb927\_1.4960 3' primer  
GAATAATGGAGCCGAAAGCC  
Tb927\_1.4970 3' primer  
TTAAAGCTCGGTCTGCCATC  
Tb927\_1.5120 3' primer  
CATTCTCCTCCTTCCCATCA  
Tb927\_1.5310 3' primer  
GATAAGAGTTGTGGTAGCAGCC  
Tb927\_1.740 3' primer  
ACACTCCCCTCAAGAAGCAA  
Tb927\_1.810 3' primer  
CGCTATCACCACCAAACACA

### 3 LDA Predictions for Chromosome I

The LDA predicted class and score for each of the 509 ORFs on Chromosome I is shown below. ORFs are arranged from the smallest (i.e. most negative) LDA score to the largest LDA score.

| ORF Id<br>(Sanger Id) | Predicted<br>Class | LDA Assigned<br>Score |
|-----------------------|--------------------|-----------------------|
| Tb927_1.150           | Coding             | -4.49417987           |
| Tb927_1.140           | Coding             | -4.20744985           |
| Tb927_1.1740          | Coding             | -3.87107596           |
| Tb927_1.4990          | Coding             | -3.71694896           |
| Tb927_1.4080          | Coding             | -3.52311019           |
| Tb927_1.900           | Coding             | -3.42227368           |
| Tb927_1.4930          | Coding             | -3.32486294           |
| Tb927_1.5320          | Coding             | -3.29026492           |
| Tb927_1.2340          | Coding             | -3.26916806           |
| Tb927_1.2360          | Coding             | -3.26916806           |
| Tb927_1.2380          | Coding             | -3.26916806           |
| Tb927_1.2400          | Coding             | -3.22380788           |
| Tb927_1.2350          | Coding             | -3.11775714           |
| Tb927_1.4710          | Coding             | -3.07292897           |
| Tb927_1.2330          | Coding             | -3.06451347           |
| Tb927_1.2390          | Coding             | -3.06451347           |
| Tb927_1.2800          | Coding             | -3.05820213           |
| Tb927_1.5290          | Coding             | -2.95077606           |
| Tb927_1.4060          | Coding             | -2.94610873           |
| Tb927_1.2370          | Coding             | -2.88676661           |
| Tb927_1.4520          | Coding             | -2.82929599           |
| Tb927_1.1450          | Coding             | -2.73829955           |
| Tb927_1.2750          | Coding             | -2.63012786           |
| Tb927_1.5080          | Coding             | -2.58402910           |
| Tb927_1.2790          | Coding             | -2.58013747           |

|              |        |             |
|--------------|--------|-------------|
| Tb927_1_1960 | Coding | -2.52063402 |
| Tb927_1_5220 | Coding | -2.51715253 |
| Tb927_1_4880 | Coding | -2.49004634 |
| Tb927_1_3960 | Coding | -2.45029359 |
| Tb927_1_4100 | Coding | -2.42811860 |
| Tb927_1_2580 | Coding | -2.42579904 |
| Tb927_1_2100 | Coding | -2.42397538 |
| Tb927_1_4470 | Coding | -2.40294701 |
| Tb927_1_4310 | Coding | -2.38216839 |
| Tb927_1_4480 | Coding | -2.37575381 |
| Tb927_1_3940 | Coding | -2.37504870 |
| Tb927_1_1100 | Coding | -2.36403133 |
| Tb927_1_3070 | Coding | -2.34222902 |
| Tb927_1_2210 | Coding | -2.31702043 |
| Tb927_1_3640 | Coding | -2.29867174 |
| Tb927_1_4180 | Coding | -2.29131120 |
| Tb927_1_2450 | Coding | -2.26941679 |
| Tb927_1_4410 | Coding | -2.26650833 |
| Tb927_1_3110 | Coding | -2.26187438 |
| Tb927_1_5000 | Coding | -2.20500412 |
| Tb927_1_2070 | Coding | -2.18899949 |
| Tb927_1_3220 | Coding | -2.17088038 |
| Tb927_1_4680 | Coding | -2.14687277 |
| Tb927_1_1440 | Coding | -2.12896323 |
| Tb927_1_4010 | Coding | -2.09148361 |
| Tb927_1_3270 | Coding | -2.08502039 |
| Tb927_1_1370 | Coding | -2.08233176 |
| Tb927_1_5010 | Coding | -2.06997303 |
| Tb927_1_4600 | Coding | -2.01659317 |
| Tb927_1_3200 | Coding | -2.00394130 |
| Tb927_1_3330 | Coding | -2.00345375 |
| Tb927_1_1730 | Coding | -1.98352704 |
| Tb927_1_2000 | Coding | -1.97871890 |
| Tb927_1_3040 | Coding | -1.97289264 |
| Tb927_1_1220 | Coding | -1.95867094 |
| Tb927_1_740  | Coding | -1.95462124 |
| Tb927_1_1920 | Coding | -1.93509127 |

|              |        |             |
|--------------|--------|-------------|
| Tb927_1_3230 | Coding | -1.93434517 |
| Tb927_1_3120 | Coding | -1.92206711 |
| Tb927_1_2320 | Coding | -1.91565554 |
| Tb927_1_3010 | Coding | -1.90549340 |
| Tb927_1_950  | Coding | -1.90102559 |
| Tb927_1_4540 | Coding | -1.89913627 |
| Tb927_1_4400 | Coding | -1.89872560 |
| Tb927_1_4230 | Coding | -1.89258190 |
| Tb927_1_4630 | Coding | -1.88522536 |
| Tb927_1_1250 | Coding | -1.88462923 |
| Tb927_1_3250 | Coding | -1.87818144 |
| Tb927_1_4040 | Coding | -1.86130849 |
| Tb927_1_4250 | Coding | -1.85472694 |
| Tb927_1_1680 | Coding | -1.83239916 |
| Tb927_1_3390 | Coding | -1.80703701 |
| Tb927_1_4280 | Coding | -1.79065996 |
| Tb927_1_1930 | Coding | -1.76468925 |
| Tb927_1_3770 | Coding | -1.75958429 |
| Tb927_1_860  | Coding | -1.75928472 |
| Tb927_1_1540 | Coding | -1.75494778 |
| Tb927_1_3260 | Coding | -1.75238026 |
| Tb927_1_5160 | Coding | -1.74199043 |
| Tb927_1_670  | Coding | -1.74128112 |
| Tb927_1_3180 | Coding | -1.74008466 |
| Tb927_1_3000 | Coding | -1.73466363 |
| Tb927_1_4560 | Coding | -1.73415937 |
| Tb927_1_4800 | Coding | -1.73207218 |
| Tb927_1_980  | Coding | -1.71595872 |
| Tb927_1_4580 | Coding | -1.71233591 |
| Tb927_1_4730 | Coding | -1.70550432 |
| Tb927_1_5170 | Coding | -1.69851501 |
| Tb927_1_3050 | Coding | -1.69821833 |
| Tb927_1_1710 | Coding | -1.69310358 |
| Tb927_1_3670 | Coding | -1.45871631 |
| Tb927_1_4320 | Coding | -1.45463635 |
| Tb927_1_1910 | Coding | -1.66919996 |
| Tb927_1_5250 | Coding | -1.65180370 |
| Tb927_1_760  | Coding | -1.61612575 |

|              |        |             |
|--------------|--------|-------------|
| Tb927_1_550  | Coding | -1.61393691 |
| Tb927_1_4330 | Coding | -1.61142707 |
| Tb927_1_2770 | Coding | -1.60836194 |
| Tb927_1_3290 | Coding | -1.59530936 |
| Tb927_1_1840 | Coding | -1.59486918 |
| Tb927_1_1150 | Coding | -1.58832852 |
| Tb927_1_2570 | Coding | -1.58595488 |
| Tb927_1_920  | Coding | -1.57938960 |
| Tb927_1_3360 | Coding | -1.57635973 |
| Tb927_1_1380 | Coding | -1.57466203 |
| Tb927_1_2640 | Coding | -1.57447919 |
| Tb927_1_4380 | Coding | -1.57205463 |
| Tb927_1_4140 | Coding | -1.53913085 |
| Tb927_1_990  | Coding | -1.53894802 |
| Tb927_1_3280 | Coding | -1.53807091 |
| Tb927_1_3950 | Coding | -1.53631729 |
| Tb927_1_1700 | Coding | -1.52479816 |
| Tb927_1_5100 | Coding | -1.52391777 |
| Tb927_1_1070 | Coding | -1.51052975 |
| Tb927_1_650  | Coding | -1.50731135 |
| Tb927_1_3760 | Coding | -1.49407256 |
| Tb927_1_2700 | Coding | -1.49357395 |
| Tb927_1_1350 | Coding | -1.49259640 |
| Tb927_1_4050 | Coding | -1.48235548 |
| Tb927_1_4420 | Coding | -1.48138263 |
| Tb927_1_3320 | Coding | -1.47857335 |
| Tb927_1_1790 | Coding | -1.47745062 |
| Tb927_1_1060 | Coding | -1.46818540 |
| Tb927_1_1090 | Coding | -1.46648948 |
| Tb927_1_1670 | Coding | -1.46550225 |
| Tb927_1_910  | Coding | -1.46509521 |
| Tb927_1_3670 | Coding | -1.45871631 |
| Tb927_1_4320 | Coding | -1.45463635 |
| Tb927_1_1320 | Coding | -1.44328513 |

|              |        |             |
|--------------|--------|-------------|
| Tb927_1_3450 | Coding | -1.43285679 |
| Tb927_1_4740 | Coding | -1.41832731 |
| Tb927_1_1650 | Coding | -1.41693025 |
| Tb927_1_2040 | Coding | -1.39606652 |
| Tb927_1_2270 | Coding | -1.39490172 |
| Tb927_1_880  | Coding | -1.38911105 |
| Tb927_1_2740 | Coding | -1.38455210 |
| Tb927_1_2020 | Coding | -1.38355142 |
| Tb927_1_1620 | Coding | -1.37930764 |
| Tb927_1_570  | Coding | -1.37828341 |
| Tb927_1_1210 | Coding | -1.36281735 |
| Tb927_1_3620 | Coding | -1.35565382 |
| Tb927_1_3520 | Coding | -1.34684856 |
| Tb927_1_4090 | Coding | -1.34393840 |
| Tb927_1_3910 | Coding | -1.34179732 |
| Tb927_1_560  | Coding | -1.33975774 |
| Tb927_1_3860 | Coding | -1.33816830 |
| Tb927_1_690  | Coding | -1.33212631 |
| Tb927_1_1330 | Coding | -1.32472790 |
| Tb927_1_2710 | Coding | -1.31491616 |
| Tb927_1_1830 | Coding | -1.31376988 |
| Tb927_1_4370 | Coding | -1.31121337 |
| Tb927_1_3150 | Coding | -1.30985322 |
| Tb927_1_1750 | Coding | -1.30447752 |
| Tb927_1_1030 | Coding | -1.30129069 |
| Tb927_1_120  | Coding | -1.29927265 |
| Tb927_1_3470 | Coding | -1.29230598 |
| Tb927_1_2190 | Coding | -1.28836044 |
| Tb927_1_930  | Coding | -1.28567001 |
| Tb927_1_1470 | Coding | -1.28160970 |
| Tb927_1_4890 | Coding | -1.27919242 |
| Tb927_1_1880 | Coding | -1.27099400 |
| Tb927_1_1560 | Coding | -1.26728199 |
| Tb927_1_3800 | Coding | -1.26358914 |
| Tb927_1_2420 | Coding | -1.26289921 |
| Tb927_1_1660 | Coding | -1.26066299 |

|              |        |             |
|--------------|--------|-------------|
| Tb927_1_2120 | Coding | -1.24973185 |
| Tb927_1_3130 | Coding | -1.24915372 |
| Tb927_1_630  | Coding | -1.24729314 |
| Tb927_1_3820 | Coding | -1.24268888 |
| Tb927_1_1690 | Coding | -1.23556670 |
| Tb927_1_1640 | Coding | -1.23159306 |
| Tb927_1_70   | Coding | -1.22105302 |
| Tb927_1_610  | Coding | -1.22086434 |
| Tb927_1_4300 | Coding | -1.21996017 |
| Tb927_1_1200 | Coding | -1.21793832 |
| Tb927_1_2230 | Coding | -1.21142363 |
| Tb927_1_160  | Coding | -1.21061485 |
| Tb927_1_730  | Coding | -1.21057800 |
| Tb927_1_710  | Coding | -1.20656140 |
| Tb927_1_3170 | Coding | -1.20645913 |
| Tb927_1_2600 | Coding | -1.20104859 |
| Tb927_1_5330 | Coding | -1.19707352 |
| Tb927_1_1600 | Coding | -1.17915862 |
| Tb927_1_3030 | Coding | -1.17903420 |
| Tb927_1_5050 | Coding | -1.17619444 |
| Tb927_1_1580 | Coding | -1.17381075 |
| Tb927_1_1550 | Coding | -1.17126790 |
| Tb927_1_1850 | Coding | -1.16130875 |
| Tb927_1_5180 | Coding | -1.15933040 |
| Tb927_1_2980 | Coding | -1.15777726 |
| Tb927_1_4720 | Coding | -1.15496651 |
| Tb927_1_1040 | Coding | -1.14844370 |
| Tb927_1_3430 | Coding | -1.13318264 |
| Tb927_1_4760 | Coding | -1.13165405 |
| Tb927_1_3840 | Coding | -1.13020515 |
| Tb927_1_720  | Coding | -1.12638538 |
| Tb927_1_830  | Coding | -1.12231571 |
| Tb927_1_5300 | Coding | -1.12222350 |
| Tb927_1_3560 | Coding | -1.12071404 |
| Tb927_1_3500 | Coding | -1.11056154 |
| Tb927_1_1160 | Coding | -1.10930907 |
| Tb927_1_3300 | Coding | -1.10650333 |
| Tb927_1_3880 | Coding | -1.10227299 |



|              |        |             |
|--------------|--------|-------------|
| Tb927_1_2730 | Coding | -1.10106481 |
| Tb927_1_2060 | Coding | -1.09638625 |
| Tb927_1_1000 | Coding | -1.09314415 |
| Tb927_1_3310 | Coding | -1.09271160 |
| Tb927_1_5060 | Coding | -1.08273294 |
| Tb927_1_1020 | Coding | -1.08272461 |
| Tb927_1_4900 | Coding | -1.06305304 |
| Tb927_1_790  | Coding | -1.06133443 |
| Tb927_1_2990 | Coding | -1.05604647 |
| Tb927_1_640  | Coding | -1.05029686 |
| Tb927_1_1230 | Coding | -1.04298374 |
| Tb927_1_700  | Coding | -1.03496718 |
| Tb927_1_4450 | Coding | -1.03311379 |
| Tb927_1_4490 | Coding | -1.02739991 |
| Tb927_1_2670 | Coding | -1.01014385 |
| Tb927_1_4220 | Coding | -1.00643990 |
| Tb927_1_4870 | Coding | -0.99570952 |
| Tb927_1_3990 | Coding | -0.98862519 |
| Tb927_1_2950 | Coding | -0.98856640 |
| Tb927_1_3400 | Coding | -0.98731596 |
| Tb927_1_2850 | Coding | -0.98551309 |
| Tb927_1_4780 | Coding | -0.98446741 |
| Tb927_1_1010 | Coding | -0.96981676 |
| Tb927_1_180  | Coding | -0.95892451 |
| Tb927_1_1420 | Coding | -0.94560455 |
| Tb927_1_5110 | Coding | -0.94364230 |
| Tb927_1_30   | Coding | -0.93609457 |
| Tb927_1_5020 | Coding | -0.92513125 |
| Tb927_1_1990 | Coding | -0.92457451 |
| Tb927_1_370  | Coding | -0.92415038 |
| Tb927_1_1340 | Coding | -0.91665291 |
| Tb927_1_1240 | Coding | -0.90901732 |
| Tb927_1_290  | Coding | -0.90600526 |
| Tb927_1_780  | Coding | -0.89170702 |
| Tb927_1_2820 | Coding | -0.88956400 |
| Tb927_1_3060 | Coding | -0.88804481 |

|              |        |             |
|--------------|--------|-------------|
| Tb927_1_870  | Coding | -0.87095447 |
| Tb927_1_1050 | Coding | -0.86359708 |
| Tb927_1_2940 | Coding | -0.85790591 |
| Tb927_1_4160 | Coding | -0.85294322 |
| Tb927_1_1720 | Coding | -0.84539317 |
| Tb927_1_1400 | Coding | -0.83741154 |
| Tb927_1_1610 | Coding | -0.83101356 |
| Tb927_1_2110 | Coding | -0.82934088 |
| Tb927_1_2510 | Coding | -0.81114174 |
| Tb927_1_2530 | Coding | -0.81114174 |
| Tb927_1_2550 | Coding | -0.81114174 |
| Tb927_1_480  | Coding | -0.80676621 |
| Tb927_1_2880 | Coding | -0.79966552 |
| Tb927_1_820  | Coding | -0.78345024 |
| Tb927_1_2490 | Coding | -0.78253895 |
| Tb927_1_2260 | Coding | -0.78121065 |
| Tb927_1_750  | Coding | -0.77358945 |
| Tb927_1_4340 | Coding | -0.75939054 |
| Tb927_1_1390 | Coding | -0.73485542 |
| Tb927_1_420  | Coding | -0.73075940 |
| Tb927_1_220  | Coding | -0.73024168 |
| Tb927_1_1500 | Coding | -0.72702674 |
| Tb927_1_1310 | Coding | -0.72022605 |
| Tb927_1_3830 | Coding | -0.68578690 |
| Tb927_1_3850 | Coding | -0.68266805 |
| Tb927_1_1530 | Coding | -0.67947449 |
| Tb927_1_540  | Coding | -0.67615669 |
| Tb927_1_4260 | Coding | -0.67069075 |
| Tb927_1_2890 | Coding | -0.63293250 |
| Tb927_1_3380 | Coding | -0.61466718 |
| Tb927_1_3810 | Coding | -0.59357954 |
| Tb927_1_1120 | Coding | -0.59299101 |
| Tb927_1_1140 | Coding | -0.57464295 |
| Tb927_1_1630 | Coding | -0.55884835 |
| Tb927_1_1980 | Coding | -0.55090969 |
| Tb927_1_1820 | Coding | -0.54263437 |
| Tb927_1_2910 | Coding | -0.54050037 |
| Tb927_1_2830 | Coding | -0.48421370 |

|              |            |             |
|--------------|------------|-------------|
| Tb927_1_2860 | Coding     | -0.48421370 |
| Tb927_1_580  | Coding     | -0.47174905 |
| Tb927_1_840  | Coding     | -0.47104407 |
| Tb927_1_3780 | Coding     | -0.46470803 |
| Tb927_1_3550 | Coding     | -0.46020465 |
| Tb927_1_3980 | Coding     | -0.44758555 |
| Tb927_1_4840 | Coding     | -0.43505401 |
| Tb927_1_600  | Coding     | -0.42266473 |
| Tb927_1_4690 | Coding     | -0.41959975 |
| Tb927_1_1270 | Coding     | -0.40560315 |
| Tb927_1_2470 | Coding     | -0.40171939 |
| Tb927_1_1300 | Coding     | -0.36868338 |
| Tb927_1_4980 | Coding     | -0.36791966 |
| Tb927_1_5150 | Coding     | -0.36318887 |
| Tb927_1_5030 | Coding     | -0.35723495 |
| Tb927_1_50   | Coding     | -0.35028729 |
| Tb927_1_2780 | Coding     | -0.31638480 |
| Tb927_1_3600 | Coding     | -0.30782257 |
| Tb927_1_5270 | Coding     | -0.27111194 |
| Tb927_1_2760 | Coding     | -0.26411341 |
| Tb927_1_960  | Coding     | -0.26378871 |
| Tb927_1_2030 | Coding     | -0.24650791 |
| Tb927_1_2970 | Coding     | -0.24300957 |
| Tb927_1_890  | Coding     | -0.22410184 |
| Tb927_1_4910 | Coding     | -0.20418397 |
| Tb927_1_1770 | Coding     | -0.19378862 |
| Tb927_1_5200 | Coding     | -0.14864450 |
| Tb927_1_1110 | Coding     | -0.14636812 |
| Tb927_1_3580 | Coding     | -0.14047505 |
| Tb927_1_4650 | Coding     | -0.11074292 |
| Tb927_1_360  | Coding     | -0.09637404 |
| Tb927_1_1900 | Coding     | -0.08313223 |
| Tb927_1_80   | Coding     | -0.06710861 |
| Tb927_1_5240 | Coding     | -0.05727332 |
| Tb927_1_2080 | Coding     | -0.04909917 |
| Tb927_1_380  | Coding     | -0.04719856 |
| Tb927_1_3650 | Coding     | -0.03937717 |
| Tb927_1_530  | Non-coding | 0.01241077  |

|              |            |            |
|--------------|------------|------------|
| Tb927_1_5120 | Non-coding | 0.01409358 |
| Tb927_1_1940 | Non-coding | 0.04287401 |
| Tb927_1_170  | Non-coding | 0.05687863 |
| Tb927_1_490  | Non-coding | 0.06710137 |
| Tb927_1_2960 | Non-coding | 0.07235822 |
| Tb927_1_3750 | Non-coding | 0.07757715 |
| Tb927_1_2810 | Non-coding | 0.09070348 |
| Tb927_1_2840 | Non-coding | 0.09070348 |
| Tb927_1_2870 | Non-coding | 0.09070348 |
| Tb927_1_4240 | Non-coding | 0.11312023 |
| Tb927_1_470  | Non-coding | 0.12176506 |
| Tb927_1_4500 | Non-coding | 0.12470561 |
| Tb927_1_2480 | Non-coding | 0.17473648 |
| Tb927_1_2560 | Non-coding | 0.17473648 |
| Tb927_1_270  | Non-coding | 0.17743783 |
| Tb927_1_3020 | Non-coding | 0.18189912 |
| Tb927_1_3680 | Non-coding | 0.18475535 |
| Tb927_1_2150 | Non-coding | 0.19069020 |
| Tb927_1_4510 | Non-coding | 0.19595768 |
| Tb927_1_940  | Non-coding | 0.21409180 |
| Tb927_1_3890 | Non-coding | 0.23447511 |
| Tb927_1_1970 | Non-coding | 0.24119401 |
| Tb927_1_1810 | Non-coding | 0.28407607 |
| Tb927_1_3710 | Non-coding | 0.28543373 |
| Tb927_1_3730 | Non-coding | 0.29779124 |
| Tb927_1_850  | Non-coding | 0.33858292 |
| Tb927_1_2440 | Non-coding | 0.36618951 |
| Tb927_1_2460 | Non-coding | 0.36618951 |
| Tb927_1_2540 | Non-coding | 0.36618951 |
| Tb927_1_390  | Non-coding | 0.38200221 |
| Tb927_1_3350 | Non-coding | 0.41173060 |
| Tb927_1_310  | Non-coding | 0.43004808 |
| Tb927_1_5260 | Non-coding | 0.43232288 |
| Tb927_1_3630 | Non-coding | 0.44955030 |
| Tb927_1_4430 | Non-coding | 0.46251179 |
| Tb927_1_3790 | Non-coding | 0.52084088 |
| Tb927_1_3210 | Non-coding | 0.52616016 |
| Tb927_1_1170 | Non-coding | 0.55578845 |

|              |            |            |
|--------------|------------|------------|
| Tb927_1_280  | Non-coding | 0.56204924 |
| Tb927_1_4850 | Non-coding | 0.58368346 |
| Tb927_1_3410 | Non-coding | 0.58579290 |
| Tb927_1_680  | Non-coding | 0.58685506 |
| Tb927_1_3920 | Non-coding | 0.59394731 |
| Tb927_1_2290 | Non-coding | 0.61316281 |
| Tb927_1_2160 | Non-coding | 0.63343422 |
| Tb927_1_4830 | Non-coding | 0.64311939 |
| Tb927_1_2500 | Non-coding | 0.65081595 |
| Tb927_1_2520 | Non-coding | 0.65081595 |
| Tb927_1_5190 | Non-coding | 0.65388183 |
| Tb927_1_3240 | Non-coding | 0.68369494 |
| Tb927_1_3740 | Non-coding | 0.69359041 |
| Tb927_1_2050 | Non-coding | 0.70955417 |
| Tb927_1_2130 | Non-coding | 0.76466151 |
| Tb927_1_4920 | Non-coding | 0.78224975 |
| Tb927_1_260  | Non-coding | 0.78369768 |
| Tb927_1_3900 | Non-coding | 0.78876725 |
| Tb927_1_1800 | Non-coding | 0.80792030 |
| Tb927_1_4070 | Non-coding | 0.86164296 |
| Tb927_1_1180 | Non-coding | 0.90685662 |
| Tb927_1_1190 | Non-coding | 0.90685662 |
| Tb927_1_2900 | Non-coding | 0.92428056 |
| Tb927_1_3700 | Non-coding | 0.93286023 |
| Tb927_1_4970 | Non-coding | 0.94463876 |
| Tb927_1_3490 | Non-coding | 0.96574977 |
| Tb927_1_3160 | Non-coding | 0.98607635 |
| Tb927_1_4210 | Non-coding | 0.98619261 |
| Tb927_1_3720 | Non-coding | 0.98847551 |
| Tb927_1_2930 | Non-coding | 0.99719770 |
| Tb927_1_2430 | Non-coding | 1.00013798 |
| Tb927_1_3540 | Non-coding | 1.00678560 |
| Tb927_1_10   | Non-coding | 1.03004582 |
| Tb927_1_3100 | Non-coding | 1.05023881 |
| Tb927_1_3870 | Non-coding | 1.06560378 |
| Tb927_1_4940 | Non-coding | 1.08121813 |
| Tb927_1_970  | Non-coding | 1.09919128 |
| Tb927_1_5210 | Non-coding | 1.12135237 |

|              |            |            |
|--------------|------------|------------|
| Tb927_1_130  | Non-coding | 1.16609517 |
| Tb927_1_4770 | Non-coding | 1.19600875 |
| Tb927_1_1870 | Non-coding | 1.22408489 |
| Tb927_1_4290 | Non-coding | 1.24403023 |
| Tb927_1_4530 | Non-coding | 1.25268874 |
| Tb927_1_5140 | Non-coding | 1.25433048 |
| Tb927_1_340  | Non-coding | 1.28102970 |
| Tb927_1_660  | Non-coding | 1.30040394 |
| Tb927_1_4270 | Non-coding | 1.31470627 |
| Tb927_1_3090 | Non-coding | 1.33116746 |
| Tb927_1_2010 | Non-coding | 1.34370697 |
| Tb927_1_200  | Non-coding | 1.37653629 |
| Tb927_1_3530 | Non-coding | 1.38401360 |
| Tb927_1_2200 | Non-coding | 1.43198249 |
| Tb927_1_40   | Non-coding | 1.43617210 |
| Tb927_1_3610 | Non-coding | 1.44437259 |
| Tb927_1_2220 | Non-coding | 1.46075413 |
| Tb927_1_400  | Non-coding | 1.49794070 |
| Tb927_1_4960 | Non-coding | 1.50122764 |
| Tb927_1_250  | Non-coding | 1.50192944 |
| Tb927_1_460  | Non-coding | 1.59136522 |
| Tb927_1_5070 | Non-coding | 1.60859057 |
| Tb927_1_3370 | Non-coding | 1.63153672 |
| Tb927_1_2680 | Non-coding | 1.65457385 |
| Tb927_1_1490 | Non-coding | 1.65546240 |
| Tb927_1_4460 | Non-coding | 1.66264496 |
| Tb927_1_620  | Non-coding | 1.70336415 |
| Tb927_1_2690 | Non-coding | 1.72077431 |
| Tb927_1_2920 | Non-coding | 1.75075240 |
| Tb927_1_4440 | Non-coding | 1.83406124 |
| Tb927_1_5130 | Non-coding | 1.87824881 |
| Tb927_1_1460 | Non-coding | 1.88673299 |
| Tb927_1_110  | Non-coding | 1.92145906 |
| Tb927_1_4660 | Non-coding | 1.92941454 |
| Tb927_1_3140 | Non-coding | 1.95608036 |
| Tb927_1_1360 | Non-coding | 1.99213777 |
| Tb927_1_1590 | Non-coding | 2.02030816 |
| Tb927_1_3570 | Non-coding | 2.03389725 |

|              |            |            |
|--------------|------------|------------|
| Tb927_1_3340 | Non-coding | 2.03541159 |
| Tb927_1_590  | Non-coding | 2.04328026 |
| Tb927_1_3590 | Non-coding | 2.07392725 |
| Tb927_1_1570 | Non-coding | 2.09343743 |
| Tb927_1_2590 | Non-coding | 2.11994882 |
| Tb927_1_1950 | Non-coding | 2.12410757 |
| Tb927_1_2280 | Non-coding | 2.17571453 |
| Tb927_1_4750 | Non-coding | 2.18727986 |
| Tb927_1_5040 | Non-coding | 2.19672924 |
| Tb927_1_2140 | Non-coding | 2.26511368 |
| Tb927_1_5230 | Non-coding | 2.26795306 |
| Tb927_1_1290 | Non-coding | 2.32364308 |
| Tb927_1_4000 | Non-coding | 2.34782062 |
| Tb927_1_3510 | Non-coding | 2.36809261 |
| Tb927_1_230  | Non-coding | 2.37067846 |
| Tb927_1_4360 | Non-coding | 2.44402336 |
| Tb927_1_210  | Non-coding | 2.45831887 |
| Tb927_1_4390 | Non-coding | 2.55725925 |
| Tb927_1_2720 | Non-coding | 2.56342924 |
| Tb927_1_3930 | Non-coding | 2.56489939 |
| Tb927_1_4200 | Non-coding | 2.58268349 |
| Tb927_1_4190 | Non-coding | 2.59524500 |
| Tb927_1_810  | Non-coding | 2.70664131 |
| Tb927_1_770  | Non-coding | 2.75018684 |
| Tb927_1_1260 | Non-coding | 2.81230773 |
| Tb927_1_3420 | Non-coding | 2.82795529 |
| Tb927_1_4820 | Non-coding | 2.83611943 |
| Tb927_1_2180 | Non-coding | 2.85535977 |
| Tb927_1_1780 | Non-coding | 2.86703579 |
| Tb927_1_3190 | Non-coding | 2.92803036 |
| Tb927_1_1760 | Non-coding | 2.94372915 |
| Tb927_1_4110 | Non-coding | 2.96769368 |
| Tb927_1_4150 | Non-coding | 2.98586071 |
| Tb927_1_4950 | Non-coding | 2.98902417 |
| Tb927_1_4170 | Non-coding | 3.05693626 |
| Tb927_1_1860 | Non-coding | 3.10055895 |
| Tb927_1_4350 | Non-coding | 3.13215952 |
| Tb927_1_3440 | Non-coding | 3.15537289 |

|              |            |            |
|--------------|------------|------------|
| Tb927_1_1280 | Non-coding | 3.17950251 |
| Tb927_1_2250 | Non-coding | 3.19453635 |
| Tb927_1_2650 | Non-coding | 3.19758340 |
| Tb927_1_4670 | Non-coding | 3.21212084 |
| Tb927_1_2170 | Non-coding | 3.21585182 |
| Tb927_1_800  | Non-coding | 3.28049415 |
| Tb927_1_3080 | Non-coding | 3.30002843 |
| Tb927_1_4790 | Non-coding | 3.38009407 |
| Tb927_1_3970 | Non-coding | 3.41986883 |
| Tb927_1_1480 | Non-coding | 3.43386493 |
| Tb927_1_2300 | Non-coding | 3.43970036 |
| Tb927_1_2090 | Non-coding | 3.45418611 |
| Tb927_1_2240 | Non-coding | 3.46798629 |
| Tb927_1_1520 | Non-coding | 3.70226190 |
| Tb927_1_4610 | Non-coding | 3.76381539 |
| Tb927_1_4640 | Non-coding | 3.76381539 |
| Tb927_1_4020 | Non-coding | 4.00424119 |
| Tb927_1_2630 | Non-coding | 4.01383201 |
| Tb927_1_4120 | Non-coding | 4.04695921 |
| Tb927_1_1430 | Non-coding | 4.09397135 |
| Tb927_1_1510 | Non-coding | 4.11907730 |
| Tb927_1_4030 | Non-coding | 4.14233512 |
| Tb927_1_4620 | Non-coding | 4.27672800 |
| Tb927_1_4130 | Non-coding | 4.38616012 |
| Tb927_1_4550 | Non-coding | 4.40622841 |
| Tb927_1_4590 | Non-coding | 4.40622841 |
| Tb927_1_3480 | Non-coding | 4.58934510 |
| Tb927_1_2610 | Non-coding | 4.62649366 |
| Tb927_1_4570 | Non-coding | 4.66140089 |
| Tb927_1_3460 | Non-coding | 4.66700712 |
| Tb927_1_5310 | Non-coding | 4.67370425 |
| Tb927_1_1410 | Non-coding | 4.72168242 |
| Tb927_1_2660 | Non-coding | 5.32964191 |
| Tb927_1_2310 | Non-coding | 5.54836192 |
| Tb927_1_2620 | Non-coding | 5.77256613 |
