# Supplementary material
Source: PubMed Central journal article supplement (PMC219476)
Supplement: nar_31_20_5877__3.pdf [file nar_31_20_5877__3.pdf]

# 1 Data

The sequence data used to train and evaluate the LDA model described in this work are detailed below. This file contains the coding sequences from the training set.

A note on the identifiers used for each sequence: where possible, we have used the GenBank accession number as the identifier. For example, the sequence marked as AC07862.6\_1 represents the BAC with GenBank accession number AC07862.6 and the \_1 indicates an ORF within that BAC. If an identifier is of the form AF031926\_1, then this indicates that it is the first entry in a GenBank record that contains multiple cds entries. GSS identifiers are drawn directly from dbGSS. Genomic contig ids are exactly those used by the Sanger Institute's sequence database. For ORFs drawn from Chromosomes I and II, the identifiers used by the Sanger Institute and The Institute for Genome Research (TIGR) were used without any modification.

## Coding regions - Training Set

AF008186 *Trypanosoma brucei* 6-phospho-1-fructokinase (pfk) gene, complete cds.

```
ATGGCCGTTGAATCTCGCAGCCGCGTTACGAGCAAGCTCG
TCAAGGCCACCGCGCCATGCTGAACAGCGTGAATCAGGA
GGACCTCAAGGTGGACCGCCTCCCCGGTGCGGATTACCCG
AACCCGTCCAAAAAATATTCGTCGCGCACAGAGTTCCGTG
ACAAGACGGATTACATCATGTACAACCCCCGCCCCAGGGA
TGAACCTCTTCGGAGAACCCTGTATCGGTGAGCCCCTC
CTTTGCGAACTTGCTGCTGCCCGCTCGCGCATTCACTTCA
ACCCGACGGAGACCACCATTTGGTATTGTCACGTGCGGTGG
TATTTGCCCGGCCTCAACGACGTCATCCGTTCCATCACC
CTTACCGGCATCAACGTGTACAACGTAAAGCGCGTGATTG
GCTTCCGCTTCGGATACTGGGGCCTTTCCAAGAAGGGCAG
TCAGACAGCCATTGAACTCCACCGCGGAAGAGTCACCAAT
ATCCACCCTATGGCGGCACCATCCTAGGCAGCAGCCGTG
GTCCACAGGACCCCAAGGAGATGGTTGATACTCTCGAGCG
CCTCGGTGTCAACATCCTCTTCACTGTCGGTGGTGACGGC
ACGCAGCGCGGTGCGCTCGTCATCTCTCAAGAAGCCAAGC
GCCGGGGTGTGACATCTCCGTTTTTTGGTGTTCCTCAAGAC
TATTGACAACGACCTCAGCTTCTCTCACCGCACGTTCCGGC
TTCCAGACTGCTGTTGAGAAGGCTGTGCAGGCCATCCGCG
CGGCGTATGCTGAGGCTGTCTCCGCCAACTATGGTGTGG
CGTTGTGAAGCTCATGGGTCGTGACAGCGGCTTCATTGCC
GCTCAGGCTGCAGTGGCCAGTGCAGGCGAATATTTGCC
TTGTTCCCTGAAAACCCCATCTCCGAGCAGGAGGTGATGTC
CCTTCTGGAGCGCCGATTCTGCCATTCCCGTTCTGCGTC
ATCATCGTCGCTGAGGGATTCCGGGCAAGACTGGGGCCGCG
GCTCTGGTGGTTATGATGCGTCTGGCAACAAGAAGCTGAT
TGACATCGGCGTTATCCTCACGGAGAAAGTGAAGGCTTTC
CTCAAGGCAAACAAGTCTCGCTACCCTGACTCGACAGTTA
AATACATTGACCCCTCGTACATGATTTCGTGCTTGCCCACC
GTCGGCCAATGACGCCCTCTTCTGCGCCACCCTTGCCACT
CTTGACGTACATGAGGCAATGGCTGGTGGCACGGGCTGCA
TTATTGCCATGCGGCACAACAATACTATATTCTTGTGCCAT
CAAGGTGGCCACTTCCGTCCGCCGTGTGCTCGACCTCCGC
GGACAGCTGTGGCGTCAGGTGCGTGAAATCACAGTGGATC
```

TGGGCAGCGACGTCCGCCTGGCTCGTAAATTGGAGATCCG  
CCGTGAACTGGAGGCAATCAACAGGAATCGCGACCGCCTC  
CACGAGGAACTGGCCAAGCTCTAA

AF009711.1 97-614 hsp83 Coding

ATGACGGAGACATTTCGCATTCCAGGCTGAVATCAATCAGC  
TAATGTCCCTTATTATTAATACCTTCTATTCAAACAAGGA  
AATTNTTCTTTCGCGAGCTAATTAGTAATTCGTCAGATGCG  
TGCGCAAATCCGGTACCAGAGTCTGACGACCAGTCCGTGC  
TCGGAGATGACCCATTGGCATCGCGTAATCCCGACCGAGT  
AAATAAGACACTGACGGTGAGGACAGTGGCATCGGTNATG  
ACGAAAGCCGACCTGGTGAACAACCTTGGTACGATTGCTC  
GCTCCGGTACCAAGTCATTCATGGAGGCATTGGAGGCCGG  
TGCGGATATGAGCATGATCGGGCAGTTCGGTGTTCGGATTT  
TACTCTGCCTACCTTGTTCGCAGACCGCGTANCCGTTGTGT  
CGAAGAACAACGAGGATGATGCCTACACGTCSGAATCCTC  
TGCAGGTGGTACCTTCACTGTAACCTCCACGCCCGACTGT  
GACCTGAAGCGCGGTACGCGTATCSTCTTGCATTTGA

AF011787 TRYPANOSOMA BRUCEI RIBOSOMAL PROTEIN L24  
MRNA, COMPLETE CDS.

ATGCGGACGATTGACTGCGAGTTCTCGCACTTCGCTGTAC  
ATCCGGGCCATGGCCGCCGCTACGTCCCGTTTGCTTTCTT  
ATCAACGAAGCCTGTGCTGACATTTGCGCGCCCGAAGTGT  
TTCGCGATGTACATGCGCAAAAAGAACCCACGCTTTATTG  
CCTGGACCCGCACGTACCGCCGCATTCATCGGAAGACGAC  
GACCGACCGCGTGGGCCGCCGCGTGCCGCACGCACAGTG  
AGAGCAGAGCGCGCTATCGTCGGTGCTGAGCTCTCCTACA  
TTCAAGAAGTGCGAGCAAAGGCCGAAGAAGGTTGACCGTAC  
CGCCAAGGGCAAAGCCGTGCGTGAGGAGATGGCTGCTCGT  
AAGGCAGCGAAGAAATAG

AF012853.1 77-1438 Trypanosoma brucei rhodesiense trypanin mRNA,  
complete cds. Coding

ATGCCACCACGGACCGCTGCTGAGCGCGGAGGAAGGAGAA  
AGTCAGTCAAGGCCCGCCACCAGTTGATCCTCTAGTGGA  
GCTCACAACCTTTAGAATCGGTTTCATGACGCGTTGGCGAAG  
GCCGAGCGGCTTCGGAACTACTTCCAGGTAGAGCGTGACA  
AGGTGAATGACTTCTGGACGATTACAAAGGGGGAGGTGGA  
GACTTATCGCAATCGGCTGTTCAATGCGGAGGCGAGCATT  
GAAGAACTGGAGCGGTCACACCAGGTAGAGATGAAGGTAT

ACAAGCAGAGGGTGCGTCACCTCATCTATGAGCGGAAGAA  
GAAGGCGCAGGCGTGCCAGGATGAAAGTGACCGTCTGCTT  
CGCGAGGCGGAAGACCGGCACCTCCAGCGCATGAATGAGA  
TACAGGCTAAGCTCCAACAGCAAGACCAGCAGCTCCGGGC  
AGCAGCGGCTGACCATGAAATGAACGTGTACGAGAAGCGC  
GATTCGCACAGCTACATGGTAACCGTTACAAAAACACAGA  
GTCATGAAAAGGAGCTCGCGCGACTGCAGGTATCCTGTGA  
GGCCAAGTTAAAAGTGTTGCGGGATGAACTGGAGTTAAGA  
CGCCGTGCGGAGATTCATGAGATTGAAGAAAGAAAGAATG  
AGCACATAAACGCCCTCATTAAGCAGCATGAAGAGAAATT  
TCATGAAATGAAGACATACTACAACCAAATAACCACAAAT  
AACCTAGAAATCATTTCATTCCTTAAAGGAAGAAATAGCGC  
AGATGAAGCAGAACGACGAGCATAATGAGACTTTAATGTA  
TGATATTGATCGGGAGAATCAAAATCTTGTTGCACCGTTA  
GAAGAAGCTCAGCGTGAGGTTGCGGAGCTGCAGCAGAAAC  
GGAAGCAGAAATGAACAGAACAAGCGGGGTCTCGAGGTCAC  
TCGTGTTAAGTTAAGGTCGTTGCGTGAGGAGATTCGCCGA  
CAGCGTGAAGAACATCAGGCCTTGAGGAGCGTTACGCCT  
GCGTGCACCGGGAGCGCGAGGAGCTAAAGGGGAAGTTTGA  
GTCCGCGCTCCGGCAAGCGGTGATGGTAGTCGAGGAGCGC  
AATGAGGTTCTCCAGCAAAGCTTATCGAGTCTCACGCTC  
TTGTAGAGGAAAGGGATGTACAACCTTGAAGGTGTTTTGCG  
CGCCATGAACCTCGAACCAAAGACGCTGGAACCTCATCGCG  
ACTGAGGTCGACGAATGGCTTCAACGAAAAAATCAACTGA  
TAAAAGACTTACACTTTGAGCTTAAGAAAGGAGAAAAGTT  
GTACAGCGCGACGTTGCTCGAGATGGAGAGGCGTTGCCAG  
ACGGCTAACATTGCTTCACTGCCACGTAGCAACTTTGAGT  
AG

AF020696 TRYPANOSOMA BRUCEI RNA BINDING PROTEIN  
(TBP37) MRNA, COMPLETE CDS.

ATGGCCCCAAAGTCTGCTGCAAAGCCTGCGGCTTCCGGTA  
AAAACGCACCCGCTCCAAAATCAGCACCTGCTGCAAAGTC  
TGCTCCCGCCACCAAGGCGTCTGCACCGAAAAAATGATCCC  
AAGAAGAACGCCCCGAAAGCTGCAGCACCCAAACCAGCGG  
CAACTGCACCGAAGGCTGCTGCCGCAAAGGAGGCGAAGGC  
ACGCCCCGCTGCTGGCACCCACAACGGTGTGTATGTGAAG  
AACTGGGGTCAAGGTTCCGTTACTGACGCCACAAGGATCT  
TCAGTGCTGCTGGCAAGGTTGTCAGTGCTCAGATCCGTCG

GCGCCGCTACGCCATTATCTTCTTCGAGAACGCCGCAGCC  
GTGAGGAAGGCGATTGATCTATTCAATGAAAAGGAGGTAC  
TTGGTGCTAAAGTGACCGTAAGCCCTGCCAAAACCAGCCC  
GAAGCCTGACCCGCATGAGGGCTCTTCCGTTGTGTTCCCTG  
TCGCCCATCTTCCGTATGTCGACAACGAATGGGCAAATTC  
GTGAACTCTTCACCGGTATGAGAGTTTTGCGCATTCCGGAC  
GTACCGTCAGAACTATGCTTACGTGTACCTTGACTCGGCT  
GCTGCAGCGCAGAAGTTTGTGAAGGAGAAGAACGGCACCG  
AGTTCCGCGGCAAGAAGCTACGTGTGGCTCTTTCAACTCG  
CTCGCTTCAGAAGGAAAAGACCGTGCGGAGCGCGCGAAC  
CTCCTTTCCGGATGCCACAACCTCAAGAAGGATGCCAAGA  
AGGACATCAAGAGGGATGATAAGAAGGATCCAAAGAAGGA  
TTCAAGGAGGAATGAAAAGAAGGATGCCAAGAGGAAGTAA  
AF027739 TRYPANOSOMA BRUCEI MALATE DEHYDROGENASE  
(MMDH) MRNA, NUCLEAR GENE ENCODING MITOCHONDRIAL  
PROTEIN, COMPLETE CDS.

ATGCGTACCAGTGCAACTCTCCAGTTTAAAGTTGCCGTCC  
TCGGTGCTGCCGGTGGTATTGGTCAACCGTTATCGCTTAT  
CCTGAAAACCAATCCTCTTGTGTCTCACTTGAGTTGTTAT  
GACATACATGGTGTGACGGGCGTGGCTGCAGACCTCTCGC  
ACATTTGTTCTCCAGCTAAGGTGACTGGTCCACCTGAAAGA  
TGAACCTCACAAAGCAGTTGACGGAGCTGACGTTGTCATC  
ATCCCCGCAGGCACACCGCGAAAGCCGGGGATGACTCGCG  
AAGATCTCTTCAGTGTTAATGCAACGATCGTTCCGAGACCT  
CGTATCGGCTTGTGCAAAACAATGCCCCAAGGCTCTTATC  
GGTGTGTTTCCAAACCCTGTCAACAGTGTTGTACCTATTG  
CTTCGGAGGTGCTCAAAAAGGCTGGTGTCTTTGACCCTGC  
TCGCCTCTTTGGCATAACCACGCTTGATGTGGTGAGAGCT  
CGAACATTTGTGGCTGAGGCCGCTGGTAAGAGTCCGTATG  
ACGTTAATGTTTCAGGTGGTGGGTGGACACAGTGGTCCGAC  
TATTATCCATTATTATCTCAAGCTGGTGTATCATTGACG  
GAGGAACAAGTCAAGGCTATAACGCACCGAGTACAGTATG  
GCGGTGACGAAGTTGTGAAAGCTAAAGGAGGGGCGGGTTC  
AGCAACTCTTTCAATGGCGTACGCCGCTGGGGAATGGATG  
TCCTCCGTGTTGAAAGGGCTTCGTGGTGACAAGGGTATCG  
TGGAGTGACGTATGTTTCAGACGGATATTATCCCGGCGT  
GAACTTTTTCCGGTTGCCCGGTGGAACCTGGGAAAGGTGGC  
GTTGAAAAGATTCACAAACCTGTGTTTGACGCGTATGAAC

AGAGTCTTTTGGAGAAATGTGTTGCGGACTTGGAGAAAAA  
TATCGCAGCAGGTTTTGCCTTCGGTTCAGACAGTGA

AF028726.1 705-983 KMP-11/1 Coding

ATGGCCACCACATACGAAGAATTTGCTGCGAAGCTCGACC  
GCCTCGATGCCGAATTCGCCAAGAAGATGGAGGAGCAGAA  
CAAGCGATTCTTCGCTGACAAGCCTGATGAGGCTACGCTG  
TCCCCTGAGATGAAAGAGCACTATGAAAAGTTCGAAAAA  
TGATCCAGGAGCACACGGACAAGTTCAACAAGAAGATGCG  
CGAGCACTCAGAGCACTTCAAGGCCAAGTTTGCGGAACTC  
CTCGAGCAGCAGAAGAATGCCAGTTCCCCGAAAGTGA

AF031926.1 SMALL G-PROTEIN (RAB1)

ATGTTGAAGAGAGGTGGGTAAACGGAGTGAAAGTAATTG  
TGATTGGTGATGAGAATGTTGGGAAATCGTCTTTGCTGCG  
GCGCTTCGTCACGGGCACATTCAGTAATCAGTACAATAAG  
ACTGTCGGTGTGGAGTATATGGAGAAGAGCGTTTGTCTCC  
GTCAACGTAGCACGACAGTGAACTCCTTTCTTTGGGATAC  
GGCTGGGCAAGAAACAGTTAGTTCTGTAAAGGATATTTAT  
TACCTTGATGCCGCGGTGGCTATCCTGGTTTTTCAGCACCG  
ACAGTAGCGAGAGTTTTTGGGAGAATAGAGATGTGGAAGAG  
GTGCGTTGAGCGTGTGTGTGGAAGCATAACCAATGGTTCTG  
TGCCAGACAAAGTTTGATCTTGACGGCAGGCCGCTGTAG  
TGGCTGAAGAGGTGGAGAACTCGCTGTTAAGTTGCAGTT  
GCCTTTGTTTTGCGTCTCTACGAAGGATGGATTTAATGTC  
ACCCAGTTGTTTCGAGTACGTGGCAGCAATGTGCGTTAGCG  
AGGCGCCGGGGGGCGAATGTGGACGGACCGGCAAATTA  
GAGTGAGGCGGATGGAAACGGCTCCACAGGTGCGGGGAAC  
GCAGGGAAGTCATCGAAATCTGGTGGAGCGGGGAAGAAGT  
CGTCCAAAAAGTCAAAGAAGAAAAAGTGCAGTGTTATGTA  
G

AF031926.2 TRYPANOSOMA BRUCEI CHAPERONE (DNAJ)

ATGGGTATTGACTACTACAAGGTGCTCGGTGTGTCGAGGG  
ACGCCTCGCCAAGCGATATTAAGAAGGCGTATCATCAACT  
TGCGTTGAAGTACCATCCAGACAAAGCCAGTGGGAATCGG  
GAGGAGGCGGAGCGGCTATTCAAAGAAGTGGCTGAGGCGT  
ATGATGTGTTGAGCGACGAAAAGAAGAAAAAATTTATGA  
CTCTTACGGTGAAGAGGGTCTTAAGGGCGGAGTGCCCGAT  
GGCAGTAGTGGCGGCCCTGGAGGTGCTGGATTCCATGGCT  
TCTCCTCTGGTGGTGGGACGTATAACTTTTCGAATAGGGA

CGCATTAAAGTATTTGAGTCTTTTTTCGGGAGCAATGAT  
CCATTTGCTGGAGGTGACATGTTTGGTGGAGGTCCCGGAC  
TACATCGTGTGTTTCGCGGATTTGGCGGACCGCACGGCTT  
TATGTCGGGTTTTGGCTCTCCGGAGATGTCGCCCGCGCAC  
GAGGTTCCGCCGCTTGAGTACACTTTTTTCGTGCACGCTGG  
AGGAGATTTACTCGGGCTGCACGAAGAAGTTCAACGTTTT  
GCGACCGCTGCCCACAGGGGAGGAGAAGAAGTTGTTTGAG  
GTGGCTGTACTTCCAGGATATAAGAAGGGTACAAAGGTGC  
GTTTCGTTGGCGAGGGTGGCATTGTTTCAGGGCTATCCGCC  
GAATGTCATGGCAGACTTGGTGTGTTGTGCTCGATGAAAAG  
CCGCATCCGCGGTTCAAGCGGGATGGCGCGGACGTTCTCA  
CAACTGTCCAGATTAACCTGAAGCAAGCTTTACTGGGAAC  
GACAATCAGTGTGCTCTGCCTTGATGGGACTACTCAATCG  
CTTCCGTTGACTGGGGTGAGCAAAAACGGTCGAAAGCTCC  
GTGTAAGTGGGAAGGGACTCCCCAATCGCAAGACGAAGCA  
AAATGGTGACATGTATGTTACCATTGAGGTGGTCATGCCT  
ACGTCACTGAATGAGGCTACGAAGCGATTGGTTGAAAAAT  
GTGAATTTTAG

AF042190 TRYPANOSOMA BRUCEI POLY(A) BINDING PROTEIN I  
MRNA, COMPLETE CDS.

ATGGCTGCATTTGCTGCTGCGAGCCCCTCCATTTGGGTGG  
GAGGTTTGGACCCCAACCTGAATGAACAGAACTCTACGA  
CCATTTTCGTTTCGTGTCGGGCCCGTTGCCTCTGTCCGCGTG  
TGTGTGGACTCCGTCACCCAAAAGTCACTTGGCTACGGCT  
ACGTGAACTTCCAGAACCCTGCCGATGCTGAGAAGGCGCT  
TGACCAGGCCGGTGTGAAGTTGGGTACGAAGCACATCCGT  
ATCGCCAAAATCCAGCGCGACCCTTCGAAACGCCGTAGCG  
GCGTGACGAACATCATAGTGAAAAAACTCCCTCCCACCGT  
GGACACCTACGCGCTGAAGGAGATGTTCTCCAAGTACGGT  
CGCCTTACTGCCATCGGGCTTGCCACTGATGAAAAAGGAG  
AATCACGCGGGTATGCCCGCATCTCCTACGAAAAGGAGGA  
ATCCGCTGTTGATGCCGTCCGGGAGTTGAATGGGGTTTCC  
ATTGACGACTGTGCCATTACCGTGGAACGCTACCAACCCC  
ACCACCGCGAAGAGCAGCTGAAACAGTACACGAACCTCTA  
CGTAAAGAACCTTGACCCCTCCGTGGACGATGAGAAGTTG  
AAGGAGGTGTTTTCTCCCTTTGGTGAGGTGACTTCCGCGA  
AGGTGCGCGATCTCGCCGGCAGGCCGACCGTCGGCTTCGG  
GTATGTTGCCTATGCCACACACGAAGCTGCCGCTAAGGCC

GTGGAGGAGTTGGATGATAAGGAAAGCCCCCTCGCAAAGG  
AAGGCATGAAGTTAAGTGTCTGCCGCTTCCGTTCCAGGGA  
GGAGCGCAAACGGGAGCGCGAACGCCTTCGCCGGGAGCGC  
CAGCAGCAGCACAGCAAATACCCAAACCTGTATGTGAAGA  
ACTTTGACGATACCGTCACGAGCGAACGCCTGAAGGCGTT  
GTTTCGATCCCTTTGGCGAGACTGTATCTGTCAGTGTGATG  
ATGGACAAAGCAACGAAGGTGTCCCGCTGCTTCCGGCTTCG  
TCTCCTTCAAGGAACAAAGCTCCGCGGCTCAGGCTATCCA  
GGAACTACACGGTAGCACGGCGTTGGGCCCTCGCCCTCTG  
TTTGTGAGTTACGCCCTCCGCAAGGACGCCCGCCGGCAGA  
CACTCGAGGACATGCGGAACAAACAGCCCCGCATGCGTCA  
ACCGCCTATGGGTGGCCTGATGGGTGGTATGATGGGACCA  
CAGCTCAGTTTCATGAATCCCCCGGCGATGTTCAATGGTA  
TGCACTTCATGAACACGCGCATGCCAATGATGCCTTCCAC  
CATGGGCATGGGTGGCCCGATGCGACCAATGGGACCGACA  
CCCATGAACCAAGTCCGCGCCCGCCCGGGACCACAGCGCC  
CGCCCATGCAATCCATGATGGCCCCACAGCAACAGTCGCA  
CCCACAAATTCCGCAACCTCCGGTTGCTCAGGGGCAGAAC  
CTCTCCACAGTACTTGCCAGCATGACTCCAGATCAGCAA  
AGAATGTGCTGGGCGAGCGGCTGTACAACACTACATTGTACG  
AAACAATCCCTCCTTCGCCGCGAAGGTTACAGGCATGTTG  
TTGGAGATGGATAACAGCGAGATCCTCAACCTGCTAGACA  
ACCACAGTCTGCTTGACACGAAGGTGCAGGAGGCCCTCGA  
CGTGCTCAACCGTCACATTGGCATGTAG

AF047722.1 133-762 *Trypanosoma brucei rhodesiense* adenylate kinase  
gene, complete cds, Coding

ATGGCGGTACTGAGCGAAGATGTCCTCTTATACCTCAAGG  
AGAAAAACATCCCTATGCTTTTTTGAACAAATCGTTCAGAA  
TATCATTTCCGATGCCCCGGAAAGGCCAATGAGTTACATC  
GGAGATCTGATGCGCCGCGGCATCCCTTTGCAAATATTCA  
TTGCTGGTCCCGCCGGCAGCGGCAAGCGCACACAATGCAA  
AAACATCGCGGACCGGCTCGGTGTGGTGTTAATCTCTTCC  
GGCCAGGTTCTTACTCGCGGCGTGGAAAGTGGCAGCGAGA  
CAAGCCAACCTGGCACATTCCTATGTTTTCACGTGGTGAGCG  
GGTGCCGGACACGCTGGTGTCAATGATAATGAAAGACCGA  
TTGTCGCAAAGCGACGCGTGTGAGAAAGGTTGGTTGGTTCG  
AGGGCTACCCACGCAACGCACAACAGGCACAGGCCGTGGA  
GGAGTGTGGTGTGATAACCACAGGTCTTTATACTGCTGGAT



CTGCCTGAAGATTTGTCCTTCAGGCGCCTTGAGCATCGCC  
GCTACGACCCCGCCACCAATAAAGANTACCACATGCTGGA  
TAATCCACCACCCGGCGGAAGATGTCGCGTTATGCGAACG  
GCTCCTGCAGAAGGATGCAAATTTCCATGA

AF048689.1 421-3162 PPK Coding

ATGGTGGCTAAAAAGTGGGTTTACTACTTCGGTGGTGGAA  
ATGCGGACGGTAACAAGAACATGAAGGAGCTCCTCGGCGG  
GAAGGGAGCCAATCTTGCAGAGATGGTGAACCTTGGCATC  
CCCGTCCCTCCCGGATTTACTATCACCACAGAAGCCTGCA  
AGACGTATCAAGAAACGGAGACTATTCCTCAAGAGGTGCG  
GGACCAGGTGAGGGAGAACGTGAGCCGCGTGGAAAAGGAG  
ATGGGGGCAAAGTTTGGCGATCCTGCCAACCCGCTACTAT  
TCTCAGTGCGGTCTGGGGCTGCAGCGTCGATGCCTGGTAT  
GATGGACACTGTGTTGAACCTCGGTCTGAATAAGGTGACA  
GTTGACGCGTGGGTACGTGCGCACCTCGCCTCGAACGCT  
TCGTGTATGACTCATAACCGTCGCTTTATTACTATGTACGC  
CGACATTGTGATGCAAGTCGGGCGTGAAGACTTCGAGGAG  
GCACTTAGCCGAATGAAGGAGAGACGTGGTACTAAATTTG  
ATACTGACCTGACCGCTTCGGACCTAAAGGAGCTTTGTGA  
TGGGTACTTGGAGCTGTTTCGAGCTGAAGACTGGGTGCTCA  
TTTCCCCAGGACCCAGTAATGCAGCTGTTTCGCAGCCATCA  
AAGCTGTGTTTTCGTAGCTGGGGTAACCCCGCGCCACAAT  
TTACCGCCGCATGAACAACATCACAGGTCTTCTTGGTACG  
GCTGTGAATGTCCAGGCAATGGTGTGTTGGTAACATCAACG  
ACCGCTCCGCCACCGGCGTTGCCTTCTCACGCAGTCCCAG  
CACCGGCGAGAACTTTTTCTTCGGAGAGTATCTTGTTAAC  
GCGCAGGGTGAAGACGTTGTGCGGGCATCCGTACCCCC  
AACAGATCAATCATTTCGCTTTCGCTGCGCTGGGCCAAAGC  
TCACGGTGTGCGGCGAAGAAGAGCGTCGCAAGCGCTATCCA  
TCCATGGAAGAGGCGATGCCCGAAAACCTACAGACTCCTCT  
GTGATGTTTCGTAAGAGACTGGAGAATCACTACCGCGATAT  
GCAAGATCTTGAGTTCCTGTCCAGGACGGTCGACTGTGG  
TTGCTTCAGTGTCGCAATGGCAAGCGTACGATTCACGCAG  
CGGTTTCGTATTGCCATCGATATGGTCAATGAGGGTCTTAT  
CTCTAGGGAGGAAGCTGTTTTGCGGATAGACCCGTATCAG  
GTGGACCATTTGATGCACCCAAATCTTGAACCTGGAGCTG  
AGAAGGCCAACAAACCCATCGGAAGGGGCCTTGCTGCGAG  
CCCCGGAGCCGCTGTGCGACAGGTTGTGTTTGATGCAGAA

TCCGCAAAGGAGTGGAGTGGTAGAGGGAAGAAAGTTATCA  
TGGTACGCCTTGAAACCTCACCAGAGGATCTCGCTGGCAT  
GGATGCTGCATGTGGTATTCTTACAGCACGTGGCGGGATG  
ACATCGCATGCAGCCGTTGTTGCTCGCGGAATGGGTAAGT  
GCTGTGTTTCCGGATGCGGTGATATGGTAATCAGGGGGAA  
GTCATTTAAATTGAATGGCAGTGTCTTCCGGGAGGGCGAC  
TACATCACCATTGACGGGTCCAAAGGACTGATATACGCCG  
GCAAGCTGAAACTTCGTTACCAGATCTGAAGGGAAGCTT  
CCAGACCATTCTTCAGTGGTGCCAGGAGATGAAACGACTT  
GGGGTGCACACTAACGCTGACACACCCGCCGATGCTGCAA  
AGGCTCGCAGTTTTGGTGCTGAAGGTGTTGGGTTGTGCCG  
CACGGAGCACATGTTTTTTGAGGGCAGCCGAATCAATTC  
ATCCGTGAGATGATTCTCGCGGATTCGGCGAGTGGCCGAA  
AGGCTGCCCTCGACAACTGTTACCTATTCAGCGTGCTGA  
CTTTGTTGGCATATTGAGGGCGATGAGGGGACTTCCCGTG  
ACGATTCGGCTTCTCGACCCGCCGCTGCACGAGTTTGTGC  
CACATGACGCCGCTGCACAATTTGAGCTTGCGCAGAAGCT  
TGGGATGCCTGCAGAGAAGGTTTCGAAATCGTGTAATGCG  
TTGCACGAGTTAAACCCTATGCTTGGCCACCGTGGATGCC  
GGCTGGGTATCACGTACCCTGAGATCTACAATATGCAAGT  
AAGGGCCATCATCGAGGCGGCTATTGCGGTAAGTGAGGAA  
GGAAGCAGTGTTATCCCAGAAATCATGGTTCCGTTGGTGG  
GGAAAAAGGAAGAACTTTTCGCTTATAAGGGAAGAGGTGGT  
AAAGACGGCCGAAGCTGTAATCACGAAATCGGGAAAACGT  
GTTCAATTACACTGTTCGGCACAATGATTGAGGTTCCCTCGCG  
CCGCAGTAACTGCCGACTCAATCGCGCAAAAGGCGGACTT  
CTTCTCCTTTGGCACCAACGATCTTACTCAAATGGGATGT  
GGCTTCTCCCGTGACGATGCCGGCCCCTTTTTAAGACT  
ATGGTAACCTTGGGATATACGCACAGGATCCCTTCCAGTC  
GATCGATCAAGAAGGCATTGGTGAGCTGGTGCGCATTGCC  
GTGACAAAGGGTCGGAGAGTGAAACCAATGCTAAAGATGG  
GCATATGTGGAGAGCACGGTGGCGACCCTGCGACCATTGG  
TTTCTGCCACAAGGTGGGGTTGGACTACGTCTCCTGCTCA  
CCATTCCGTGTGCCTGTTCGCGATTGTTGCCGCTGCTCATG  
CCTCCATTAAGGATAGGAGGGCTGCGATGAAGGCGCGTAA  
GGGATTCGCGGCCAAGCTTTAA

AF049902.1 188-1144 Trypanosoma brucei rhodesiense activated protein kinase C receptor Coding

ATGGCTGTCGCTTACGAAGGACAACCTGACGGGTCACCGTG  
GCTGGGTTACATCCCTCGCCTGCCACAAAACCCCTGAAAC  
CGCAACGAAGGTGGTATCCACGTCCCGGGACAAGACCCTT  
CTTTCATGGGGCCCTAACCCCTGACCGGCACAGCAGTGAGT  
GCAGCTATGGCCTTCCCGACAGGCGTCTGGAGGGGCACAG  
CGCATTTGTGTCTGACGTTGCCCTTTCCAACAACGGGAAT  
TTCGCTGTGTCTGCGTCATGGGACCATTCCTGCGCTTGT  
GGAACCTGCAGAACGGACAATGTCAATACAAGTTTCTTGG  
CCACACAAAGGACGTACTIONTCCGTGGCCTTCTCTCCCGAC  
AACCGACAGATTGTCTCCGGTGGTTCGTGACAACGCTCTGC  
GCGTATGGAATGTCAAGGGCGAATGCATGCACACTCTGAG  
CCGCGGTGCTCACACCGACTGGGTGAGTTGTGTCCGCTTC  
TCCCCGTCTTTGGATGCCCTGTCATCGTCTCTGGTGGTT  
GGGACAACCTGGTGAAGGTCTGGGACCTCGCTACCGGGCG  
ACTTGTACACGGACCTTAAGGGACATACAAACTATGTCACA  
TCTGTGACCGTTTCCCTGACGGTTCCTCTGTGCATCTT  
CCGACAAGGACGGCGTCGCTCGTCTGTGGGACCTGACTAA  
GGGTGAGGCCCTTTCTGAGATGGCCGCTGGTGCGCCTATC  
AACCAAATCTGCTTCTCTCCCAACCGTTATTGGATGTGTG  
CGGCTACCGAAAAGGGCATCCGCATCTTTGACCTGGAGAA  
CAAGGACATCATCGTTCGAGCTTGCGCCGGAGCATCAGGGC  
AGCAAAAAGATTGTCCCGGAGTGCGTTTCCATCGCGTGGT  
CTGCGGATGGTAGCACCCCTGTACTCTGGGTACACGGACAA  
TGTCATCCGTGTCTGGGGTGTATCGGAGAACGCGTGA

AF074867.1 48-2027 Trypanosoma brucei rhodesiense lysosomal/endosomal membrane protein Coding

ATGATGTGTACCGCAACCGTTATGAGGACTCCCTCTGCGG  
TTTTGTGCCTGCTGCTTGCAGCAACCCTGACTCTCAGCAC  
TCCCGTTGCCGTTTCGCGGGGAAGTGCTTAAGGATGCGACC  
CCTACAGTTGTGACAGTCTGGTATAACGCCACGAGCGGGC  
GTTTCTATGCTACGGATGGTCTTGCATCTGGTAAGTATGC  
TGCAATCGTGAATGTGAGTAACACTTTCAACAAGACCGGT  
TGGGACGTTGTGACTGCTGTGGCAAACGATGGTTTCATGC  
ATTTGCCTGGAGAAGCGGAACCGTCAGCAGAGCGCGTGCT  
ACTGGCATAACAAGGCTGTAGGTTTTGGTGAAGGCTACGCC  
ACGTATGAGAGCATGAAGGCTTCCATAAACAATACGTTTG

AGGGTCCTGAGGGTCTCTCTGCGCTTTTGTCTGATGCGCC  
GCAGGCACAACACTGGATTGAAGAGCACGTTTCGATATATG  
GATGCTGCGAAGTTTCGAGAGCAGTGCATTCTACACCCAGC  
TGCGAAACATGTTAGCTCTCATTGATGGTATGGTTGCTGG  
TTACAACGCTCGTGCCCCTGCTGACGAACGGTTGGATCGG  
ATGAAGCTGTTAATGTACAACATGCAAGCAGAGATTGGTG  
ACATTGTGAGGGCTACATCCCCTGCGGAGGTATTGGATGA  
TATGCGTCAGATGATGCCGCGGTGGTTTGTGACACCCAC  
TGTTCTGCCTTTGTAAAGGTCGTAAAGGATGACATCTACT  
TTGGTCACGCCACGTGGAGCAGCTTCAATACTATGTTGAG  
GCAGTACAAAACGTATGCCTTCGGCGGGCGCTTCGTTACC  
ATGTCATCTTACCCAGGTTTGGCGCACAGTGTGGATGATT  
GGTACATGACACACAAGCGCCTCGCAGTCATGGAGACCAC  
CAACGTCATACACAATGCAACGCTGCTGCGCAACCATGTC  
GGTTCCTCTAGCGTGGCTACGTTTCTGCGTGCGATGATCG  
CGAACTTCATTGCGGTGGACGCCCCCTCATGGGTGTGCGAA  
CTTCAGCAGGGAAAGCAGTGGGGCGTACAACAATCAATGG  
ATGGTGCTCAACATGGGTGCAGTGGAGTCCGAGGCGATGT  
TTAAAAACATGGCACCCAACACCTTTTGGGTGTTAGAGCA  
GCTCCCTGGTACTGCTCCTCCGTTGGGTATAACATCTAAG  
GATATGACCAGCGTGCTGAACACCACTGGGTACTGGGCGA  
GTTATAACAGACCGTACTTCCCAATGTGTACAATCTTTC  
AGGTACGCTGAAGATGCAGGAGGAATACGGTGA CTTCTAT  
TCTTACAAGAATTA CTACGCGCCCGGATATTTGAACGTG  
ATCAGGGTTCTGTGGTCGATATTGAAAGCATGAAGAAGCT  
GATGCGTTACAACA ACTACACGAAAGACCCATTTTCTCTT  
ATTCCCAACTGCACTGGTGCTGTTGGTATGGATGACGATG  
GTAATGTGACTAATGTCTGCAAGCCTCCATACAGTGCGAT  
GCTTTCAATCGCAGCACGTGGTGATTTGAACCCTCCTGGT  
AATGCGACCGAGTACGGCCCACTTGTCCGAAGTG TAGGAC  
ACGTAAATAGTGGAGCTATCGATGCAAAGATAGCGACGTG  
GACGGGGATGGTGAAGAATCCTGAAAGTTATACTGCTCAT  
GTTGTCTGTGGCCCGACGACCGATAATCAACCACCGTTTC  
AGTGGGTGGACGGCATGTTTCGATCCCATGCCCCCAACATA  
TGGGTTGCTGAAATTGTATAACTTTAGCTTCGTAGTCATG  
GAGACGCCGATCCGACCTTCCGGTGGTAGTAATAGTTGGA  
GGAGCACTGGCATCATTGCTGTTGTGGCGGGCGCTGGTTGT  
GGGTGTGATTGCCGTCGTCCTCATGCGTCCGAGGCGGCGT

ACCGAAGAGGATGAACTTCTTCCCGAAGAGGCTGAAGGTC  
TTATAGATCCTCAGAACTAG  
AF078916 TRYPANOSOMA BRUCEI BRUCEI OLIGOPEPTIDASE B  
(OPB) GENE, COMPLETE CDS.

ATGCAAACCTGAACGTGGTCCAATCGCCGCACATCGGCCCC  
ACGAGGTGGTTTTTGGCAAAGTTGAGGGCGAAGACCGCGG  
CGCCAACCCAATGGACCCGCCCGCCGCAGGGTTCGACCCG  
CTCTTTTGGCTTCGCGATGATAACCGTGCCGATCCCGAAG  
TCCTCGCCACCTCCACTTGGAGAAGGATTATTACGAGAA  
GCGCGCGGTTCGATATTAAGACCTGGCGGAACTATTTAC  
CAAGAGCACATTTACACATTGAGGAAACGGACATGTCGG  
CCCCCTACGTCTACGACCGCTTCTTGTACTACACGCGTGA  
TGTAAGGGGTTGTTCGTACAAGCTTCATTGTCGCGTACCG  
GCCGGGAAGACGCCGGGTGAGGGTGAGGATGAGGAGATTG  
TACTGGACGAAAATAAGCTCGCGGAGGGCAAATCTTTTTG  
TGTCGTGGGTTGCGTGGCGCCCGCCCCACCAGAACATGCC  
TTGGTAGCATACTCCGTTGATTACTGCGGGGATGAGGTGT  
ACAGCATCCGTTTTCGTACGGGACGTGGTGGCGGACAAGGT  
TGAAGGCACAAACGGAAGTGTGTGTGGGGGCCCAATGCC  
GAATGCTTCTTTTACATTACGAAAGATGCCTCCAAGCGTG  
ACAACAAGGTATGGCGTCACATTATTGGCCAACCGCAAAG  
TGAAGATGTATGCCTCTACACCGACGACGATCCACTCTTC  
TCGGTGGGTGTGGGGAGGTTCGGGTGACGGCAAGACGCTGA  
TCATTTGCTCTATGTCATCAGAACTTCGGAGTCACATCT  
GTTGGATCTGCGCAAGGGGGTTAAGCACAACACACTCGAG  
ATGGTACGACCCCGTGAGAAGGGGGTTCGCTACACTGTGG  
AGATGCACGGCACGGACACACTGATAGTGCTGACAAATAA  
AGACAAGTGCGTGAATGGTAAGGTTGTATTGACCAAGCGG  
AGTGCACCCACAGATTGGGGGACCGTATTAATACCCCATG  
ACGACAAGGTA ACTATTGATGATGTCGCCGTATTTCGCAA  
ATTTGCAGTTCTATCCGGCCCGCCGCGATGGTTTGACGCGC  
GTATGGACGGTCAGGCTCGGGCCTGACAACCTCTTCAGCT  
CTGCAACGCTGAAGGAGCTGCACTTCGATGAGCCTGTTTT  
CACTGCCCATGTGGTTTGTCTCAAATGAAGACATACGAT  
GCGTCACTGCTGCGCCTGAGGTATTCATCCATGACAACCC  
CCACTGTATGGTACGACGAGGACGTA CTGAGCGGAGAACG  
CAAGGTTGTGAAGGCGCGTAAGGTGGGGGGCGGCTTTGAA  
TCGAAGAATTACGTTTTGTCGGAGGGAGTTGGCTACAGCTC

CTGACGGGACAAAAGTTCCCATCTCGCTCGTATACGATAC  
CAGTATCGATTTGAAGAAGCCCAACCCACCATGCTCTAT  
GGATACGGTTCCTACGGCATTGTCATTGAGCCTGAGTTTA  
ACTCACGGTTCCTGCCGTATGTTGATCGGGGTATGATATA  
TGCTATTGCGCACGTGCGAGGCGGCGGTGAGATGGGTCTG  
ACGTGGTATGAAGTTGGGGGAAAGTACTTGACCAAACGGA  
ATACCTTCATGGACTTTATTGCATGCGCGGAGCACCTTAT  
TTCCTCTGGTCTCACAACACCCGCGCAGCTTTCTTGCGAG  
GGAAGAAGTGCTGGTGGATTGCTGGTGGGTGCCGTGTTGA  
ATATGCGGCCAGATTTATTCCACGTGCCCCTCGCGGGTGT  
CCCTTTTGTGGACGTAATGACAACCATGTGTGATCCAAGC  
ATTCTCTTACGACAGGCGAGTGGGAGGAGTGGGGGAATC  
CGAATGAGTACAAGTTTTTTGACTACATGAACAGCTACAG  
TCCAATTGACAACGTGCGTGACAGGATTACCCTCATTG  
ATGATTCAGGCCGATTGCACGACCCACGCGTCGCGTATT  
GGGAACCGGCGAAATGGGCGTCAAAGCTCCGTGAACTCAA  
GACAGACAGCAATGAGGTGTTGCTGAAAATGGATCTGGAG  
AGTGGACACTTTTCTGCAAGTGACCGCTACAAGTACTTGC  
GAGAAAACGCAATACAACAGGCTTTTGTGCTGAAGCATCT  
CAATGTACGGCAGCTGCTGCGGAAGTAG

AF079110 TRYPANOSOMA BRUCEI GLYCOSOMAL MALATE  
DEHYDROGENASE (GMDH) MRNA, COMPLETE CDS.

ATGGTCAGCGTTGCCGTAATTGGAGCCGCCGGTGGTATTG  
GCCAGTCTCTATCGCTACTTCTTCTTCGCCAACTGCCGTA  
CGGGAGCACGCTCTCGCTGTACGACGTGGCGGGTGCCCC  
GGAGTGGCCGCCGATCTCTCACATGTTGACCGCGCCGGCG  
TCACCGTCAAATATGCTGCTGGAAAGCTCCCCCAGTGAA  
GCGGGATCCCGCCCTCGCCGAACTTGCGCGCGGTGTTGAT  
GTTTTTGTCAATTGTGCGCCGGTGTGCCCCGTAAGCCCGGTA  
TGTCTCGTGACGACCTCTTCAACGTGAACGCCGGCATCAT  
TATGGATCTTGTCTCACATGTGGTTCCTCATCGCCGCAG  
GCATGTTTCTGCGTCTGACGAACCCCGTAAACAGCACCG  
TGCCGATTGCCGCTGAGGCCTTAAAGAAGCTTGGCATCTA  
CAACAAGAACAACCTCCTGGGCGTAACTCTGCTGGATGGG  
CTCCGTGCTACCCGTTTCATCAACAACGCTCGCCACCCTC  
TTGCCGTGCTCCGTCCCGTTGTTGGTGGCCATAGCGA  
CGTAACGATTGTCCCACTGTTTTCTCAACTTCTGGTCCA  
CTCCCTGAGGAGGGGGAAGTACACAGATCCGCAAGCGTG

TGCAGGTGGCGGGTACGGAGGTGGTGAAGGCAAAGGCAGG  
CCGTGGAAGTGCCACCTTGTTCGATGGCTGAGGCAGGTGCC  
CGTTTCGCGATGTTTGTGTGAACGCCATCACAGGTCAGT  
CTTCCCCGATGGTTTATGCGTATGTGGATACAGATGGCAC  
TCAGAATTGCTCGTTCCTCGCAATACCGGTGGTTCTTGGC  
AAGAATGGCATTGAAAAGCGCCTACCGATAGGTCCCATGA  
ATGCTGTGGAGAAGGAAATGCTTAAGCAATCCATCTCCGT  
TGTGAAGGCGAACATTGAGAAGGGAATGAATTTTCGCGCGC  
TCAAAGTTGTAA

AF095907.1 667-3645 GDH Coding

ATGATGCGCCGTGCTTCTTACTGCGCGGGCCATGCCTTCA  
CTTCGCTCACCGTCGTTGGGTCCCGTCGATTCTTTCAGGG  
TGAAAGATGTGAAGCGGAAATTGTAAACTGACAAAGGAG  
CGCGGCATGTTTCAGTGATGCCTCAGTCGAAGCTTCTGTGC  
ACCAGTTGATGTCTCGACTCTCCGACAGCCCATATGTTTCG  
TCATTACACGGACGCAGAAGTATCGGCGCATGCTCACGGG  
TTTCTTTGTGCAAAGGCAAGGAGTGCCTGGGTGAGCCGT  
TTGAGCATTTCACGAAAGTGACGATTCGGCCTTCTACAT  
TTGCCGAAAGGACCAGGCAAGTCAGCTGCGAGCCGTGCGG  
CAGTTGACCAAGTTTGTTCAGCCGCGAAAGGGAAACCAAAC  
AATCTGTCTCTGTGCGTTGTTACTGCGCGGTGACAGTGA  
CATTGCCGTCTTCACCGCCAAAATACGTCTTTTGTGAAC  
CCCAATCCGAAAAGGGTGAAACGGACATCGGACAACCTTG  
CGAGTTCCGCTTTTTTGGAGGAGCGTTCACCAGAGATGCA  
GGAGCGATATCAGGACCTCATCAACCGCTTCCACGAATCA  
GTTGTTCCAGTTCACACTGTGCGCGAAGTGGATGGTGAAG  
TTTGTTTTTCCATGATCATGGCCGCAGACCGCTCCTACTA  
CATCGCGACGTTGCAGACAGTCATACAGGAGATCCCCGGC  
GCTGTCGTCACACGCTGTTTCTCGGAGACTTTTTCCAATG  
ACACTCATGTTTACACGTATTTGTTTCGAGGTGCTACAAG  
TCAGCAGCTTAGCGATCGCGCCTCTCTAGTGCCCTTCCTT  
CCAACCCGCCCCCGCAGTTTGATTACGCGCCTTCACGAGG  
ATATGGTGTTCGACACGGAACAAACAGTGTACACGGATGC  
TGCAGTCATTCGCCTTCTACTTACCCACAGCCGACATCC  
GAAGATTATCGTCATCTACGCAGTTTGGTGTGGAAGGAAC  
CCAACGGATTGAGTCGTCTCAACAATCTTCGCACAACACT  
CAGTCTCGAGATGATGTGCGGAGCGGTATATCCTCACGCTC  
ATCTCCACTTACCCCGAGTTCATGAAGGAGATATATGAGG

ATTTCCAAGTTGGCACCACACACGAGCGACGCTGTGCAAT  
CCGGGAAAAAATCACCACCCGCTTCAGGGAGGATCAGCGC  
TCCGAGCACGACTTGGGCATCTTCAATGCATTTCTGCAGT  
TCAACGAGGTGGTTTTAAAGCACAATTTCTTTAAACAGCA  
TAAGGTGGCGCTCTGTTTTCCGCCTCGACCCTTCTTTTCTT  
CGTTCATTGGGGTACCCACGAGTACCACATGGTGTTTTTTC  
TTCTCGCTGGCGCGCAGTGGCGTGGATTCCATGTGCGCTT  
TACCGACATCGCCCGCGGGCGCTGTGCGCATGATTTTTTCG  
AAGGACACCATGTACCGCCGAAACAAGCGCTCTGTTTTCC  
AGGAAACTACAACCTTGCCCTCACCCAGTTGCTGAAGAA  
TAAGGACATAACGGAGGGTGGCAGCAAGGGAACCATTCTT  
GTCTCATCTCGCTACCTGAATACATTCAACCAGCCTCTTT  
GTGAGAGGATTTTTCTTGCAGTATGCTGATGCACTATTGGA  
TGTTGTCATTCCAGGAGAGGAAGGTATCGTCGATCGACTG  
AAGACACCAGAGATCATTTTCCTTGGGCCTGATGAACACA  
CGGCAGGCACTTTCCCGTCCGTTGGCTCTCTGTTCAGCAA  
GAAGCGCGGGTACAGTGCCTGGAAATCCTTTACAACCTGGT  
AAGGATGCTTCACTGGGAGGTATTCCTACTACGATACTTA  
TTGCCATGACAACCTCGTTCAGTCCGTACGATGGTTCGTGG  
GGTGTATGAGAACTTGGACTCGATGAAGCAAGTCAGACA  
AAGTTTTTGACAGGTGGCCCGACGGTGATCTTGGCTCCA  
ATGAGATTCTGCTGAGCAAGGAAAAGACACTGGCGGTATT  
GGATATTTTACGCCTCACTTTTTTGATCCCGAGGGACTCAAC  
AAGGAGGAGCTGAAGCGCCTCGCAACTGCGCGAAAACAAC  
TGCGGGACTTTGATAAGTCCAAATTGTCATCGAAAGGTTT  
CCTTGTACTGACAGGGGATAAGAATGTGACGCTCCCAGAT  
GGTACACACGTCAGCGATGGCGTCTCATTCCGTGATGAGT  
TCCATCTTACGAAGTACAGTGCCGCCGATGTGTTTGTGCC  
ATGCGGTGGGCGTCCCCGCAGCGTTACGCTTGCAAATGTT  
GGTCGATTCCTCAACTTAAGCGCCGCTGACAACGACTCTC  
TACTTGCTGGGGGCAGCATTAGCTGAAAACCCCGAAATA  
CAAGATAATTGTGGAGGGTGCCAACCTTTTTTATATCGCAG  
GATGCGCGTCTTGCTATCGAGCGCTGCGGTATTGTTTTGA  
TTAAGGATGCATCTGCAAATAAGGGTGGTGTCACTTCCTC  
ATCACTTGAGGTGTATGCGGGCGTGGCGCTTTCCGACGAG  
GAGCACGCGCAGCACATGTGCGTCAAGGATCCCAACAATG  
TGCCGGAGTTCTACAAGAAGTATGTGCTAGACATTATTGA  
GCGCATTGAAAGTAACGCCCGCCGTGAGTTTGAGGCCATC



TGGCGTGAACAACAGGTACAAGAAGGGATGCCCAAGACTC  
TCATTGCCGACTCACTAAGCGAGAAAAATGTAAGAGTGCG  
TGCTAGTATTCTTTTCGAGTGACATGTGTGAGAACAAAGAA  
CTCGTTTCGCTACGTTCTCAGCAACTACACCCCCAAAACTC  
TACTTGAAGTGGTCCCCTCGAAACACTAATGGAGCGCGT  
GCCCTCGAGTACCAAAGGCCATTTGTGCAATGTGGCTT  
GCATCGGAGTATGTGTATACCACCGGCATCAGCGGTAATG  
AATTTGACTTCTTTACTTTTCATGACAAAACACATGGAGCA  
GGCCAAGCACATCTCTTAA

AF102869 TRYPANOSOMA BRUCEI SIR2 HOMOLOG (SIR2) GENE,  
COMPLETE CDS.

ATGACAGAACCGAAGTTAGCAACCACGCACGTAGTGGGTG  
AACCCACCTTTCGAAGGACTGGCACGGTTCATTGAGCGAAA  
CAACATCACCAAATATTTGTTATGGTGGGCGCAGGGATA  
AGCGTTGCAGCTGGAATCCCCGACTTCCGCTCTCCCCACA  
CCGGCTTGTACGCTAAACTCAGTCGCTACAATCTCAACTC  
ACCGGAGGACGCCTTCTCACTCCCTCTCTTGCGTCAACAA  
CCAAGTGTGTTTTACAACATTCTGATGGATATGGACCTCT  
GGCCCGGAAGTATTGTCCTACGACGGTTCACCACTTTAT  
CAGTCTACTCGCCAAGAAGGGCATGTTATTATGCTGTTGT  
ACGCAGAACATAGACGGGTTGGAACGCGCCTGCGGAATTC  
CAGAGTCTTTACTAGTTGAAGCCCATGGTTCCTTCTCTTC  
CGCATCATGTGTTGACTGTCACGCGAAATATGACATCAAC  
ATCGCGAGGGCGGAGACAAGGGCTGGAAAAGTGCCTCATT  
GCAATCAATGTGGTGGTATAGTGAAACCCGACGTGGTTTT  
CTTTGGCGAGAATCTCCCGGAGGCGTTTTTTAACGTAGCG  
GGACTCATTGAGGAAACGGAATTGCTGCTTATTTTGGGAA  
CCTCACTTCAAGTCCACCCATTTGCCGACCTTGCGCTCAT  
GGTGCCCTCTGACGTGCCACGAGTGTGTTTAACTTGGAG  
CGTGTGGGCGGGAGGATGTTCCGCTTTCCTACGGACCGAA  
CACCCAATTTCCGCGCCAGTTCCTATCGTCTCAGCACTGG  
AAATGGCAATGGCAGTAAAATTAGCAGTGGGGACAGCAGC  
AGCAGCAGCAGCGTCGACGGGTATGACCAGTTTACGCTCG  
CAGAGAATGACGAGACGGGTGTGTTGCGTGACATTTTCTT  
TCCTGGTGAAGTGTGAGGTGTCTGTTTCGTTCCCTTGCTCAG  
GCGTTGGGCTTCGGAGAGCAGCTTGACGCCTCTGTACGTG  
AGGGAAGGGAAATATTTGAGCGCACTCGGCGTAGGGAAAA  
AGTCGTTGAGGGTTAA

AF119091 TRYPANOSOMA BRUCEI  
ALKYL-DIHYDROXYACETONEPHOSPHATE SYNTHASE GENE,  
COMPLETE CDS.

ATGGATAAGAGAATGATTACTGATGCATTTGAAGAAATCA  
AATGGAATGGCTGGGGGGACACTGGCGTGTGTATCAAATA  
CGATGAGGCGAGGCAACTCCCCATACACACAAATGGAAAG  
CCGATGAAGCATCTTCTGAAGTTCATGAAGGACGATGTCC  
TCAAGGTGAAGGGAGAGTTTAAAATTAAGCCCACACCCGG  
GCTAACAAAAGAGGAGGCCATTAACGGCTCCCACCACCT  
GTAGTGAAACAACCATTCGTGGATGAGTTGCGTCAGGTTT  
TGTCAAAAGATCAGATCCGTCTCGACGCATATGCCCGCCT  
GACGCACATCTTTGGTAAAAATTATCGCGACCTTTGGCGT  
GTGAGGCGTGGTATGATCGACCGCCACCCGATGCGGTCA  
TTCTCCCCAACAAACCACGATGATTGCGTAAAGATTATGGA  
ATTGGCACAAAAACACAACGTTGTTGTTGTGCCATTCCGGT  
GGTGGCACAAATGTGACAGGTGGCGTGGAGCCGAATCCCT  
TTGAGACGCGACGTATGGTTATCTCCATTGACATGCGACG  
GATGGGGCGAATGCTTCATATAGACACAGAATCTGGTACC  
GCTGTGTTTGAAGTGGGAGTGCTTGGCCCAGATATAGATG  
AGCAACTGAGCCGCTACGGTTTCATGATGGGTGATGACCC  
CGATAGTTATGCATATTCGACTCTTGGTGGCTGGATTGCT  
GCGCGAGGCAGCGGTGCCATGTCTGAATAAATATGGAGATA  
TTGAAAACATGATTCTCGCCATGCGGGTGGTGACACCTGT  
TGCGGTGGTGGAAACACCCCTTACCTCGCGACCCTGCGGT  
GTCGACTTGAACGCCATGTTTGTGGGTCCGAGGGTGCCT  
TTGGACTTGTTACAGAGGCTGTTGTTAAGATTGAACGCCT  
ACCAGAGGTGAAGCGTTACGAAGGCTGGCTCTTTCCCTCA  
TTTGAAGTTGCTTTTACTGCTTTCCATACATGCACACGCA  
AGGGGATCCACCCTTGCACAATGAGGTTATACGACGAAGA  
CGACACACGGCTCAGTTTTGCAGCAAGTACAGACTCCGGG  
TTGGTTAGTACATTCTTCAGCAAGTGCTTTAAGAAATACA  
TCGCAACTGTGAAGGGATGGAACCTCAGCAAAATATCACT  
TGTGGTTGTCGGGTTTGAAGGAACCAAAGCCCAAACGAAC  
TGTCAGCGGAGTGAATTGGTTGGCGTCTTCCAAGCCTTCG  
GTGCCACATGCTTGGGAACCAAGCCGGGTAACACGTGGCA  
AGAAAAGAAATACGACCTTCCGTACCTTCGCGATTTGCT  
CTGGCTCACAAATTTTGGGCGGACGTATTTGAGACGAGTG  
TCCTCTACACGGACGCTATTCCTGCTGGAGAGCAGTCAA

GAAATCGTTTGC GGAAGTGATGGCCGAGAATGGTAAGAAC  
GCATGGATAGGCTGCCACACTGCACATCAGTACCGTTTTG  
GTTGCTGTTTGTATTTACCTTTATTGGCGGGCAGGCCGA  
CGAAAATGACCTCAAGATCTTTTTGCAAGTAAAAAAAGG  
GCGATGGAAGTCATGTTACAGCACAGAGGAAACCTAACTC  
ACCACCATGGAATAGGTTATGAGCACGTCCCATGGATGAA  
GCGTTACAATGGTGAGGGTGGGTTAGACGCAATTATGAAG  
TTCAAGAAAGCGCTTGATCCAAAGAACATATGTAACCCGG  
GAAAACCTGCTCCCCTCACCCCTTCGGAGAAGGAAACACC  
AAAGGCCACACAGGCCCGTCAGAATCGTGAAATGATGTTT  
GACAAAATGGGCATTCCCGGGGCTCTTCAGGCTCACCTCT  
GA

AF152173.1 326-3169 Bad1 Coding

ATGGAAGCGGTTCTTCGCAAGGTGGAAAAGCTCAAACAGA  
ACTTCCGGCACAGCGGCGGTGGCTCAAAGTTTTTCAACAC  
CGCGTTGCGCGGAGAGGGAACGGCGCTGCAACATGAGCTT  
AACAGCAATGATAAGTCGCGCCAAAAGAACGCTGTGAAAC  
GCATTATCGCCGGAATGACGATGGGCCGTGCCGTGAGCCA  
TCTCTTCATGGATGTCGTGAAACTCGGGCAGACGACAAAT  
CTTGCGCTTATGAAGTTGGTTTACCTATACGTTCTCAGTA  
TCGCGAACTTCAGGCCTGGGAAGGCTCTCATGGCGGTCAA  
CACATTTCTTCAAGACACAACCAACCCTTCACCAGTCGTG  
CGGGCGCTCGCCGTGCGAACGATGATGTGCGTGCGTGTGG  
ATTCCGTGACGGAGTATACTGGAGCCCCTCCGTGCGCGC  
TGTCAATGACTTGGATCCGTATGTTTCGCAAGAACGCAGTC  
ATTGGTATAGGAAAGCTGTTCCACAACAGCAGTCAATTAT  
ACGAGGATCAGGGCTTCAGCACGGAGCTTCTAAAATTGCT  
GACTGATAAAGCTGCCGTTGTTGTCTCCAATGCGGCCGCC  
GTGGTGATGGAGGTCACCACCAACGCGGGACTCCAATTGT  
GTTGGAGCGTCACCACATTTATGCACTTGCTGGACCAGAA  
ACCTGGAACCACAGAGTGGGGGCAACTCAACATCTTGGAG  
CTTGTTTCTTGCACCGGCCCGGCGACGATAGATTTGCAG  
AGGATGTTGTCTCGCGCGTTATGCTGCAGACCAATCACAC  
AAACCAGTCTGTTGTCATGGGAGCCATCAAAGTCATCATC  
AACTACTTACCTCACTGTGGTCAAAGCACAGTAAATGAGG  
TTGGCGTGCGGATTAACCTCAGCCCTCGTGACACTGTGAG  
AGGCGATCCCGAGGCACAGTACGTTGTGTGCAAGAACATT  
CACGCCCTGCTTGTTCATATTCCCTAACCTTCTGATTAACA

ACCTGGATTCCCTTCTACGTTTCGCTTCTCGGACCCACCATA  
CGTAAAGCTGGAGAAGTTGCGACTCCTGCTCAAGCTCGTC  
AGCAATTCCTCAGCAAATGGCATCCTGAAAGAGCTGGAGG  
AATACAGCACCGAGGTGGATCCATTCTTTGTTCGAGGAGGT  
GGTGAAGGGAATAGCCGAGCTCGCACTTAAGATTGACTCA  
GTTGCGCAGAGCTGTGTGGCTCTGTTGCTGCGTATTGTTA  
AAAACCGCCCCGAGTTGCTGCCACAGGTGGTGACAAGCTG  
CAAAAATATCACCCGCAAGTACCCAAAGTTGCTTGTGCTG  
GGCACTCTAATCTCGGAGTGCAGGGGCGGACGGCGTAGTGG  
AAGAGGAGGCGAAAGTGTCACTCATTTGGATGTTGGGTGA  
GTTCTGTGAATTTGTTGAAAACGGGATGGACATCATTCGA  
AAATACATTGAGGAACTCATGCTGCATGAGCCACCAGTTC  
AATTGAGTATCCTTAGTGCCGTTATCAAGATGTTTTTTGCG  
CGATCCTCAGGGAATGGAGCCGACCCTCAACACTGTGCTT  
GACGCACTGACAACACAAAGCAGTGACCCCGATATACGCG  
ATCGCGCCTATGCATACTGGCGGCTGCTTTCCAAAGGTAT  
TGCGGTGGCCAAGATGAAAGAGATCGTCCATGGACACCAT  
GCTGCAGTTGCCGTGGAGTCCACATTCAGCGATGCTATGA  
CAATGGGAGATTTATTAAGTCTATCAACACGGCTGCAG  
CGGGTATTCGCAAGACCCGCCAGTCGTTTCTCCCACCCT  
ACGGCTTCGTCACTGAGGACGGGTAACGATGAAGAAGAGG  
AAGATGAAGAAGCGGAGCCGCAGTCCAGTGAGCCACAGGT  
GGGAAGCACCGAAGCTGCGCAACCGTCTCTCTTCGATTTT  
GGCCCACCAGCGGCATCGAGTTGCCGGCGGGACCAAATA  
ATGCAGCAGCGGGAGCAGCTGCAACCAGCCATAGGGATCC  
CCTCGAAGACCTGCTCGGCGGGGGTCTGCCAGCGGCACCG  
CCAAAACCAGTTGTTCAACAGGCGTCAACTCTGGATGATT  
TGTTTTTCATCAAGGGAAGAGAAGGTTAACGCACCAAATCC  
GCAACTGCTCCCCACCGTTCCTCTTCGTTGTACGTACCT  
TTTCCCCTGCTGGACTGTGTGGATGGACTTTGCTTTTCAC  
GCCCCGGTAGTTTTGAGTGTTTTCTGTTCTTCTACCCTTA  
TTGTTGTTTCGCTCTCTTTATTACTCTGTAGAGAGTGGAGG  
AGGAGAAGCGCCAAAAAAAAAAGAAGACAAATCTAAGTGGG  
GGAAGGGAAGAAAAGAAAAGACAGAACGCTAATCAT  
TAAAGTGCCGTGTGCGGAACTGCTACCGATAGTGATGACC  
TCACTTCCACTTACTCCTCGAACCTCGTTGCTCGCTTGCT  
GGTACATCTTCCCTTCTTTATGCTACGTGCCCTGTCCCTCC  
CCCCCACAACTCGTCTTCTTATTCTTCTAGTGGTTAAT

CCTCCTGTGGTGGAGAAAAAGAAAGGTATAGTATGTCCGC  
ACTTCTTAATGCAGGCAGTGTGGGGCCGTATCCACGCTGA  
GATGAGACTTCCAGTACTTAACTCAAATCGTACATTGTCA  
GTTAGGTGTTTCATCTGCAGCGGAAAAAGAATTCACACT  
ACATTCAAATCACTGGCTCACTCTTTTTGGCCCGGAGTG  
TGAAATCCAATCACATTACCCACTTTACCTGTGTCAAACG  
GTCTGCTATCAAGGGGGGGTTAAATTTCCAACAAAAGCGG  
GAATTTTCCCTGCGGAAACTGAGACCCACCGGACCTAGG  
GTAG

AF152174.1 314-1465 Pho1 Coding

ATGGGCCGCATCACTACCGACCTTCTTCGGCGTCGCGCGG  
AGCACAATGAAGGTTGCCTAAGCAACCTGAAGGAGGTGGC  
ACTGCATCAGCAGGACATTGAAAGGATCGAGCTCATTGGG  
GACGCGTGTGCTGAGCTGGAGATCCTATACTTGTGCAACA  
ACTACATTTCCCGCATCGAGGGCCTACAGCATCTCAAGTA  
TCTCAAATATTTGAACCTTGCTGTGAACAATATTACTTAC  
ATCGAAGGTCTCGAGGGATGTGAGGCCCTGGAGCGTCTGG  
ATCTGACGTTGAACTTTGTGGCGGACGTGACATGCGTGGA  
GCGCCTGCGGGCGAACGCTTTCTTGGACCAGTTGCATCTT  
ACTGGAAACCCATGCACGAAGGTGGCCGGGTACCGTGCCT  
ACGTTGTTACGCGCTGCCGCAACTGCGTGAGCTCGATGG  
AGAAGAGGTAATTAAGACAGAGCGGCTGGAGGCGCGTCAA  
AGCAAAGACGACATTTCAAGTCGCTGTGAATGAGGAGGCAC  
TGCGACTGCAGAAGCGGAGCGTATCAAGTCAGAGATGGTT  
GCACGAGGCGTTGACCGCCTTTCCGCCACGATAACAACGAG  
AAGGGTGAGCGTTTATATGGTCATACTCCAGAGGAGCGGC  
TCCAGATGCTGCGCGAGAAGGAGGAGGAGGAGAGGCGCAA  
AAGGGAAGAGCAACGGGAACGTGAGCGGTCTAGTCAGTTC  
GGCGGATACGTGAAGAGTTGGAAAGGAAGCCGCAGCGTC  
TCACTGCGGAGGAGGAAATAGCGAAGCACGGGCGGCTTCT  
GCTGAGAAACGAACCCAAACTCCCCTTCACTCTTGACGAG  
GAAGCGGATGATGGTGAAGCAGTTGTGTTGACAGTGAAGG  
TACCGAGATTCTCTCCACAACGCTAATTGACGTACAAGT  
GGAAGTGAACACATACGAGTGTGTTGTTAAGGAGAACTC  
ATCCAGGTTCCGTTAAGCCAAGAGGTTGCTCCCTCGGGTG  
TTAATGTACAACGCAGCTCGGTGAATGGTGAACCTGCGAAT  
TAGGATACCGTACGCACCACACGTTTTTGCAGGAGGTTTCT  
GAGGCGAGGCGGCGGCGACAGCGGTTGCTTGGTCTTCTGA

GTGACGATAAAAATGAGGATGGAACCGGGTGA  
AF164200.1 467-2662 CDC47 Coding  
ATGGCGGACGGGCCGACGCAAGAGCAGACCAAAAAGGCGG  
CATTTGCTGTAGCTGCTACCTCCAAGTATCCCAACTACTT  
GGCCGATCGTGATTTGTGCAGACGTTTCTTTGAAGAGTTT  
CGTGATGCGTCTGGCGGGATGAAATACATGGATATGGCGG  
CTCGGGTAGCCCGTAGGGAGACAAACGTTTTCACTGTTGA  
TCTAGATGACATACTTTATGGGCAGTTGTACCTGGCG  
CAGCGAATCCAAATGAATGTCATGGGGTACCGTGAAGAGG  
TGTATCGCGTTGTGGATGAGATAATTCCGGAGGCTTATTT  
CGAAGAAGATATGATTGATCACCTTATTTTAGAGGCGCAG  
ACAGCGGGACAGCATCTTCCTCCATTACTTACGAGACGTT  
ACGAACTGGTTGTGATGCCCTTAAGCTTCTCTGAGCC  
TGTGCCTCTCAGGCAGTTAAAGGGGGGTTTGATAGGCACA  
CTCGTTGTGTTGCGTGGAATTTGTATTGCCGCAACAGCTG  
TACGCCCCAAGCTATCAATGTTAGTATCTGTCTGCGAGGT  
GTGTGCTGAGACCACATTTACAGCAAGTTATTGGGGATCGC  
CTGACCCCGCTAATGGTGTGCCAGTCACAGCGCTGCAGGT  
TGAACAATACCGTAGGTGCTCTGCTCCCTCAGTATAAGGC  
AAGTAAGTTCACCAAGCACCAGGAGCTTCGTTTACAGGAA  
CTTCCCCAGTACGTGCCCCGAGGTGCCATTCCCTCGTACGA  
TTCGTGTCATTTGTGAGGGTGAGCAGACACGAATAGCAAC  
CCCAGGACAGGTTGTAAAGGTTGTGGGGACGTATTGCCCT  
GATCCGTCTACTGGGCAAGGCCATGAAGCATTTAGGGCAT  
CAACAATGGTGAAGACTCTATTTTCGCGCTCTGCGCATTGA  
GTTGGAAAGGCGCAGCTATCAGGAGGCTGCAGATGACCTG  
AAGATTCAGGTAGATAATGTGAAGCAGCATCCCGACAAGG  
AGGTTGTTATTGAGAAGCTGACGCGAAGCGTGGCACCAGA  
AATCTGGGGAATGGAGGATGTTAAAAAGGCACTACTCTGT  
TTGTTGGTTGGGGGAAGTTCCATTGCCAACGGGATTTCGCA  
TACGAAGTGACACCAACATATGCTTGATGGGGGATCCCGG  
GGTCGCCAAAAGTCAGCTTTTGAATGGATTGCTTCGGTA  
GCCCTCGTTCTATTTTACAACAGGGAAGGGCAGTTCTG  
GTGTTGGTTTAAACGGCGGCTGTGACTAGAGATACTTACAC  
CGGAGAGGTGATGCTTGAGGGTGGCGCATTGGTTCTTTCG  
GACCGGGGTATTTGCTGTATTGACGAGTTTGACAAAATGG  
ACGATAGCGATCGGACAGCGTTACATGAGGTAATGGAACA  
ACAGATGGTGTCTATAGCTAAAGCTGGGATAATTACTTCG

CTCAATGCCCGCACATCTATTTTAGCCGCCGCAAACCCCA  
AGTATGGACGTTGGCGCCGCAACTTGACACCGAGTGAGAA  
TGTAATTTACCTCCCGCGCTACTTTCTCGTTTCGATGTC  
CTTTGGCTTCTGCTTGACGAATCAAACCGGGAACGGGATG  
CAGAACTTTTCGATGCACGTAACCTATGTTCAATTTGCACGG  
TGTGGCACCAGGGACGGTATCCGACAATGGGTTTTACGGT  
TTGTCAAGTGACTIONTTGGAAAGGATTTCCCTGCAGGCAT  
ACGTTGGTGAAGCCAAAAAATTCACCCTATTGTTGACAG  
CTCTGCAGCAAAGGTTATCAGTGACATTTATTGTGAAATG  
CGGGCTCAGAGTGTTTCGTACACAAAACGTTGTTACCGCGC  
GGACACTACTCAGCATCATTCGCCTCTCGCAAGCATGCGC  
GCGACTCCGCTTCTCCGACCGTGTTCGTTGAAGCTGATGTA  
CGAGAGGCTGGTTCGGCTTTTAGACTGTAGTAAGATTTTCGC  
TACAAGAACGTGTGGATAACGGTGGGCGGCGCATGGTGAC  
AACATCTGATGCTGCAATTTTCTCGACCATTAAGGAATTG  
GCTCGTTCCAGGGGGTTCGATTGATTTGGCTGAGGTGCGAC  
CGGCTCTTATGATAAAAGGTATTGACGAGTCACATTTACA  
ACGCTGTTTGAACACTTACGCGGACGTGGGTGTGTGGGAA  
GTGAGCGGGAACACTGTTCACTTTTCACTGGAGTGA

AF164200.2 3102-3563 NDPK Coding

ATGCCAGCGAGCGGACCTTCATTGCAGTCAAACCCGATG  
GCGTGCAGCGTAATCTCGTGGGAGAAATCATCAAGCGCTT  
CGAGAACAAGGGCTACAACTTGTGGTCTCAAACCTTCTC  
CAGCCCCTGAGGAACAAGCCAAGCAGCACTACATTGATC  
TCGCATCGAAACCCTTCTACAGTGGCCTTGTGTCGTACTION  
TTCCTCTGGCCCTATCGTCCGTATGGTGTGGGAGGGCCTC  
GGTGTGTGTAAGGGCGGCCGTGTGCTTTTGGGCGCAACGA  
ACCCCGCAGACTCGCTCCCTGGCACCATTCGTGGTGACTT  
CGCCGTGGATGTTGGCCGCAATGTGTGCCATGGGTCCGAC  
AGCGTGGAAAGCGCCAAACGCGAAATCGCGTTCTGGTTCA  
AGGCGGAGGAGCTGGTAAGCTGGACGTCCCCTCCGTCAA  
GCAAATTTATGGAAGGGCATAA

AF168719.1 1-903 Trypanosoma brucei rhodesiense fibrillarin mRNA,  
complete cds. Coding

ATGCGAGGTGGGTTTGGACGTGGAGGCGGTAGTGGATTCC  
GAGGCGGAAGAGGTGGCGGTGCACCAAGCCGTGGTCCGGG  
TGCGGTGGACGAGGAGGTGGAAGGGGCGGTAACGCTGGA  
CCCCGCGGCCGCGGTGGCCGTGGTGGAGGGGGTTCGTGGTG

GGGGTGCTGGAGCCAAAGTTGTCGTTGAACCCCATTTGTT  
GCATCCCGGTGTCTTTATTTCTAAGGGTAAAGCGGATTCA  
CTATGCACGCTTAATATGGTTCCTGGAGTGTGAGTATACG  
GGGAAAAGCGTGTAGAAGTAGGGGCAACACAGAGTGGTGA  
CGAGAAAAAGGAGTATCGGCTTTGGAATCCATACCGGTCA  
AAGCTTGCTGCCGCCATTTATGCGGGAATAGGGAGCATCC  
ACATGAAACCTGGCTCAAAGGTGTTGTACCTGGGGGCCGC  
CAGCGGCACGACTGTGAGCCACGTGAGCGATCTTGTTGGA  
CCTGAAGGAATGGTTTACGCGGTAGAGTTCTCCAACCGAA  
GTGGTCGTGACCTCGTTGATATGTCGAAGAGAAGGCCTAA  
CATCGTTCCTATAATAGAGGACGCTCGTTACCCAATGAAA  
TACCGTATGCTGATGCCGATGGTGGACTGCATTTTCATGG  
ATGTTGCCCAACCTGATCAGGCCCGGATTCTCGCGTTAAA  
TGCTCAGGCATTTCTCAAGAATGGTGGTCATTACGTAATT  
TCTATCAAAGCCAACCTGTATCGACTCAACCCTCGATGCTC  
CCGTGGTTATCGCAGCTGAACTTGATAAGTTGAGAAAGGA  
CCGTCTGAAGCCACTGGAGCAAGCCTCACTGGAACCGTTT  
GAAAGAGACCACGCAGTTGTCGTAGGGGTGTATCGCTCTA  
TGAAGAAAGCAGTACAACAATAA

AF169651.1 124-837 psa7 Coding

ATGTCTGGCTCTGGTCATGACCAGTCAACAGATATATTTT  
CTGCTGACGGGCGTGTGTTTCAGGTAGAGTACGCCTGCAA  
GGCTGTGACAATGGCAGCACCGCCGTTGCTGCCTGTTGC  
AAGGACGGTGTGTCGTTGCTGTGGAGAAAATCCTCACAA  
GCCGCATGCTGGAGGAAGGGTCCAATAACCGTATTCATGC  
GGTAGATCGGCAGGCCGAATTTGTGTTTGTGGAGTGCTC  
CCCGATGGTCTTGCTGTTGTTTCACGCGCTCGTGGTGAAG  
CAGAGAACAGTCGAGATATTTTTTCCACACCGATACTAGG  
CTCCTTGCTTGCGTCTCGAATCGGCGAGTTTATGCACGTT  
TACACGACTCACTACGCCTATCGCCCCTTCGGCTGTTCCG  
TCATCATTGCCTCTTATGCTGACGATGGCCCGCAGCTTTA  
TGTGGCCGACCCGAGCGGGGCAGTTGCGGGGTACTATGGA  
ATAGCGTTGGGGAAGGGCAAACCGTGGCCAAAACCGAGT  
TGGAGAAGCTGGACTTTGCGACTCTGACATGCAGTGAGGC  
GGTGGAAAAGCTAACCAACATCCTCCATGAGGTGCATGAC  
AAGTCGAAAGATAAAATTTATGAGGTGGAGGTGGCATGGG  
TGTGCGACAAGTCCGATCGCACCTTCGTGCATGTGCCGAA  
GGAAATGGTACCGCATCCAACCCCGCATCATAG



AF169652.1 176-919 psa4 Coding

ATGAGCTACGATCGCGCAATTACTGTGTTTAGTCCCGATG  
GACATTTGTTCCAGGTTGAGTATGCGCAAGAGGCCGTTCCG  
CAAGGGTCTCTGTGCAGTTGGTGTGAAAGGGAAGGACAGC  
ATTATCTTTGCTGTGGAGAAAAAATCAGTGCAAAAGCTGC  
AGGACAGTCGTACGACCCGCAAAATATACAAACTTGACGA  
GCATATTTATCTCGCTTCCGCAGGTCTCTCTGCCGACGCC  
CGTGTGGTTGTGAATCACGCACAACCTGGAATGTCAACGCT  
TCCGCTTGAGCTACGAAGACGCCATTGACGTTGACCTGCT  
CGTGCGGTACGTGGCAAGGGTACAGCAACGTTCTACGCAA  
TCAAGCGGCAGCAGACCGTACGGTGTTC AACCATCATTG  
GTGGCTTTAATGAGAATGGGCAGCCGCAGTTGTGGAAGAC  
GGAGCCGTCTGGAACGAGTTCAGCGTGGAATGCAGCAGCA  
ATCGGCCGAAATGACAAGGTTGTGCTCGAATTTATGGAAA  
AAA ACTATCAGGATGGCATGACGCGGGATCGTTGCGTGCA  
CTTTGCAATTAAGGCGCTTCTTGAGGCTGTTGAAAGTGGG  
TCGAAAACATTGAACTCCTGGTGCTGGAGCGCGGTAAGG  
CGGCTTACATGAGCGACACCGAATTGCACAGGTTTCGTCTG  
TGAGGTAGAAAAGAGCGCGAGGAGGAGGCCGCAAGGAGA  
AGGCGCCTTGCCGAAGAGGATTGA

AF169653.1 130-747 psb3 Coding

ATGTCCATTCTCACGTACAGCGGTGGCTCCTGCTTAGCCA  
TGGCTGGCAAGGAGTGCTTTGTGGTGATTTCCGACAATCG  
CCTTGGTGAGCAACTTAAAACGATTTCTATGGAGGTTCCG  
AAGCTACACGTCATCAACGATGGGATTGTTATGGGACTCA  
CGGGGCTCCGAACAGACCAGCAAACCTTCGCTCAGAAAGT  
TAACTTCCGGACCGAAATGTACAAACTCCGTGAGGAGCGG  
GACATTAACGGGAAGGCTTTCGCAGCTTTAGTGTCCTCTA  
TGCTCTATGAGGCTCGGTTCCGGCCCATGGTTCGTGGAGCC  
TGTGATTGGCACCATCGACCGCAAAACCGGTGAAGTATAT  
CTCTGCGCTACGGATCTCATCGGTGCCCGGTGCGAGCCAG  
AGGACTACGTCTGCGCTGGCACCTGCGCTGAGAGTCTTCA  
CGGTATGTGTGAGGCACTCTGGCGGCCTGGGCTTGAACCG  
GAGGAATTGTTTGAAGTTGCTGCGCAAGCAATGCTTTCTG  
CATGCGATAGGGATTCCCTCTCAGGTTACGGTGCGGTGGC  
TGCAATTGTAACAAAGGACAAATTGGTAACACGTCTCATC  
AAGGGTCGCAAAGACTAG

AF174136.1 1271-2392 RAD51 Coding

ATGAACACTCGCACCAAAAATAAGAAACGCACTAAAGAGG  
TGATAGAAGATGAAGTTCACGACATCGATGATACCGCGTT  
CGATGATGCCGCAGTGGATGCGGTCAACGACAACACGCAA  
GAGATGCAGCAGCAAGTTGGTGACGCTGCCGGTGGGCCTT  
CCTTTCGTGTCCTTCAGATAATGGAAAACCTATGGAGTTGC  
TTCTGCTGATATCAAAAAGTTGATGGAGTGTGGCTTTCTC  
ACCGTTGAGTCTGTGCGGTATGCACCGAAGAAATCAATTT  
TAGCAGTGAAGGGCATAAGTGAGGCAAAGGCTGAGAAGAT  
AATGGCGGAGTGTTGTAACTCACTCCGATGGGCTTCACG  
CGCGCTACGGTTTTCCAAGAGCAACGGAAAGAAACTATTA  
TGGTCACGACAGGCAGCCGTGAGGTGGACAAACTCCTTGG  
AGGTGGCATTGAAGTTGGTAGCATCACGGAACTTTTCGGT  
GAGTTTCGCACAGGGAAGACGCAGCTCTGCCATACCCTTT  
GTGTTACATGCCAACTTCCACTTTCGCAAGGTGGTGGTGA  
GGGAATGGCGCTTTATATTGACACTGAGGGAACATTCGGT  
CCTGAGCGCTTGGTAGCTGTGGCGGAACGGTACAGCCTGG  
ACCCAGAGGCCGTTCTTGAAAATGTGGCGTGCGCTCGTGC  
TTACAACACGGACCATCAGCAGCAGTTGTTGTTGCAAGCG  
TCCGCCACTATGGCTGAGCACCGTGTGCAATAATCGTTG  
TTGATTCCGCCACAGCTCTTTACCGTACTGATTACAATGG  
ACGGGGTGAGTTGGCAGCACGGCAGATGCATCTTGAAAG  
TTCCTCCGCTCTTTGCGCAATCTTGCTAATGAGTACAACG  
TGCCCGTTCGTTGTTACCAATCAGGTTGTTGCCAATGTGGA  
TGGTGCTGCCCCACATTCCAAGCGGATTCTAAGAAACCC  
ATTGGGGGCCACATCATGGCACATGCCTCCACTACACGGT  
TGAGCTTACGGAAGGGAAGGGGAGAACAGCGTATTATTAA  
GGTGTATGACTCACCTTGTCTCGCTGAAAGTGAGGCCATC  
TTCGGCATCTATGAGAACGGTGTGGGAGACGTTAGGGACT  
AG

AF179372.1 65-1198 RNHII Coding

ATGCGTAGACTTGAAAAGGAAAAGGAGCAGTTAATGGCAC  
GCATGCGGAAGAACGGGGTGGTGATTTCGGCGAAGTATAAA  
AGAAACGTTTTTAACAATTGGTTGTGATGAAGCTGGTCGT  
GGACCACTTGCTGGGCCGGTGGTTGGGGCGGCCGTGTGTC  
GCATCCCACGCTCAAGTTTTAACAACGATCTAAAGGCACT  
GTACGATGCCGATGAGGAGTTTCAGATATTTGACAGCAAG  
TCAGTTTTCGGAAACCCAACGTAAAGTCGTATATAACAATA

TCACCGGGTACCACAATTTGTTTTTCATTAGTGGAAGACCA  
GGACTTCGTGGTTCACCATGCCGGGGGCGATTTCGGTGCCC  
GATAATGTGCTGAAGAAACGACTTCCTTCACACACCAAAC  
TGGGCAAACCTGCCTTTTAAGAAGCTTCTCTCCATGCAGAC  
GCCGTATTTGATTTACATACCACGGTAGCAATGTTAGCGGT  
AATTACTTGTACTTTTGGGCCATTGGTATTGCAAACCACA  
CTTACATTGACACGGTTAACATCTATTCCGCCTCTATGAA  
CACCATGCATCGATGTTGCCTCGGTGTTTGGGATGCGCTG  
AATGATGCGCGTTTTTCCCTACCATGTAGCACCTCGACCCA  
AAAACCTGTTCCATTGCCCAGTATCTGTTCTCGAGGTTTTG  
TATAACCGCTGCAAACGATGATCGCCGGCGATATGAGGTT  
CCCGACCAAATCGACTTGGTAGAGGGTGCAGCTGACTTTT  
TTGACGCAGAACCTGTCCAGCCTCCATTGGTCTTAGTTGA  
TGGGCACACAGCGCCCTACGAAACGGTTTCCGTTTTCACT  
GATGTTTCAGACGGGTGGCTGCGTGCAGCCGATCATAGAGG  
GCGACAAGCGCAGCCTTACAATAATTGCAGCTGCTTCATG  
TCTTGCCAAGGTCTCGCGGGATGAGATAATGGACTATCTT  
GATCCATTGTACCCAAAGTATCACTTTGCAGAGAACAAGG  
GCTATCCTGTGGATCATCACATGCGTGCTGTGAAGAAACA  
CGGTTTGTCTCCATCCACCGTAGGTCTACAGACCCTGC  
GCGGAAGCGTTGGCAAGGCAAGCGAGGCGCAAATGAAAG  
ATAGCCACTCATAG

AF181287.1 677-2992 TSI1 Coding

ATGGAGGAACTCCACCAACAAATGCGCATGCCAATCTCGA  
GACTGCTGTTGATTTTCACTGCAGTTTGTCACTGCTGCGC  
TCTGACTTCCAAGGCTGCGGGCAAGGGGACGACGCGTGAG  
GCATTTCTGTCCGGCGGTGCGTGGGCTTTGAGAAAGAAGC  
TGAGCGAGAAGGATGGTGAAGTGTGGTGGTGGCAGGATGG  
ACCCAATTGGAAGGATAAGTATGATAAGGAATGGGAGAGA  
TGGTTCAAAGAAGAGAAAGGTCCCTGGGGAGGGTCTGAGA  
AGCGTAGCGAATGGTTCGCTCGAATGACAGGTGGGTACAT  
AACGCTCGGCAAAACGAAGATACTTTCATCTGCTATTGAG  
GGTAGTGATAAGGTAGAGCGCACTGTGCATTCCTTTCGTA  
TTCCTTCGTTTGTGAGGTTGATGGGGTGCTGATGGGTAT  
TGGTGATGCCCGGTATCTTACCTCCACGGATTACTTCTTC  
ACCGACACCGTTGCTAAATACAGTGCGGACGGGGGCAAAA  
CATGGAAAACAGAGGTCATCATTGAAAATGGTTCGCGTGGA  
TCCCACATACTCTCGTGTTGTGGATCCTACTGTCGTTGCT

AAGGCGGACAGTGTCTTTGTGCTTGTGGCAAGATACAATG  
TCACGAAGGGGTATTGGCACAACGAAACAAACGCAGCGGG  
TATAGCGGATTGGGAACCTTTTCATGTACAAGGGTGTAGTG  
ACTAAGGGTGCCGACGGTAAAACCAGTGATGTGCGGATCT  
CTTGGACAAAGACACCACTGAAACCCCTCTACGACTTCAC  
TGTTGCAGGAAGCAAGGGCACGCAGTTCATTGGAGGAGCT  
GGTAACGGCGTTGTAACATTGAACGGTACAATATTGTTTC  
CGGTGCAGGCGAGGAATGAAGACAATGCCGTTGTAAGCAT  
GGTTATGTACTCTGTTGACGATGGTGTGAGTTGGCATT  
GCCCGTGGTGAACGGCGCTTCTCACATCGGAAGCTTCTC  
TACTGAGTGGAATGGGAAACTGCTGATGAGCGCGCGGAC  
AGACACTTCTGGCGTTAACGTAGAAGGTGGGTTCCGCAAG  
GTGTTCGAATCTAACAACCTTGGGGCAACGTGGGAGGAAT  
CACTCGGAACGATTTCCCGCGTAATTGGGAACTCACCCGA  
CCGTACGAAACCGTCTCCAACGGCCAACCTATCCCGGTAGT  
TCGGGGGCTCTTATTACTGTGACGCTTGGGGATGTGCCTG  
TGATGTTGATTACCCACCCGAAAAACACAAAGGGGGCATG  
GAGCCGGGACCGTCTACAGCTGTGGATGACAGATGGTAAC  
CGTATGTGGCTTGTGGCCAGATATCGGAGGGCGACGATA  
ACAGCGCTTACAGTTCTTTGCTGTTGGCCCGTGATGGACT  
GCTTTATTGTCTGCACGAGCGGAACATTGACGAAGTGTAT  
AGTCTTCATCTTGTGCACCTTGTGGATGAGTTGGAGAAGG  
TTAACGCGACGGTGCGGAAATGGAAGGCNCAGGACGCCTT  
ACTTGCTGGCCTTTGCTCTTCATCACGGAAAAAGAACGAC  
CCCACCTGCTCCGGTGTCCCTACCGATGGCCTTGTGGTT  
TACTCGCCGGCCCTGTTGGTGCGAGTGTGTGGGCTGATGT  
GTACGACTGCGTGAATGCCAGTATCTCTGATGGTGTGAAG  
GTTTCGGAAGGCGTGCAGCTGGGAGGCAAAAGAAACAGCC  
GTGTGCTGTGGCCTGTGAGCGAGCAGGGACAGGACCAGAG  
GTATTACTTCGCCAACACGCACTTTACGCTGCTTGCCACC  
GTTTCGGTTCGCGGGGGAACCGAAGGCGGAGGCACCGCTGA  
TGGGATTTTCAAACGCAGAGGGGAAAACGAGCGAACTTT  
GAGTCTCACAGTTGGCGGCAAGAAGTGGGTCTAACGTAC  
GGCTCCGTCCGTAAAGAGGGCCCAACCACGTGATGGATT  
GGAATCAAACCCATCAGATTGCGCTCACACTGCGTGATGG  
TANAGTGGATGCTCATGTCAATGGAGAGCTCATAATAAAA  
GAAGTGAGTGTAGGCGCTTCTGAATCTTCTGCACATCTAC  
ATCTCTCACACTTTTTTATTGGAGCGCCGGTAAATGACAG

TGGGGAGGGAGGCAATAATGTGATCGTCAGAAATGTTCTT  
CTGTACAATCGAAAGCTCGATGAGGACGAACTGCAACTGC  
TATATAGCAACAGGGAAAAGATACAACCGGTCGTCAGTGC  
AGTTGGTATCCCCGAAGGTATGAGCGCACCTCGGTTATGT  
TGTCTGCTGATCTTAATGTATGTGTTGGCGATTTGA  
AF208112.1 AF208113 AF208114 AF208115 2280-4376 ACS1 Coding  
ATGGGAATGTACGTCACCTAAGCTTCTCTCCCTCTGGAGTC  
ACTGGTTTGAGGTGGATGACGAGGTGATCATTGCGAGACA  
AAAGTTTGGGCCACTTGCTCACATTTGTGGACCAGCGGAG  
GGCGAAAACCTGTTACCTGTTTACCGCTCCATAGGAGTCA  
CAGATGAGGAGCAGGCGCGCATTACGAGGGAATGGTATTA  
CGGCGAGCACTTTCTGAAACAGTTGGAGCAAACATGCACG  
AGCAGAAGAGATACTCTGGCAGTTGCTTACCGCACAATTA  
ACAAGGTTGAAAAGGAGTGGCGCGAGGACCATAATGGGAA  
GAGGCGCGAATGGCAGGTTACACATCTCAACGATCCGGTC  
TACATGACATATGGTGAATTATGGGAGAACTCTGTGGCCT  
TTGGAAAGGGTTTAAGGGAGTATGGAGCAAAGGAAGGGGA  
CCGTGTTGCCATTTACGAGGATACGCGATGGGAGTGGCTT  
GCCTCTGCTATTGGGGTTTGGACGCAGTTGATGGTACTG  
TAACAGTTTACGCTAACCTCTGCCGGGAGGGGCTGATGCA  
CGCGCTCAAGGAGACGGAGTGTGCCGCTATTATTTGCAAC  
GGCCAAAACATAAAGGATCTCATTACCTTACTGAAGGAGG  
TCAATCTCACCAACACCACGTTGGTCTATCTCGACTCTCT  
ACCAGATGGGTAAATGATGAAGGCATGCGCTTAATACCA  
TGGAACAGGTGCTGGAGACGGGAATGAAGAGTAACCTGG  
GCTATAACCATTCTGGAAATTGTGACACAACGGCTTTGAT  
CATGTACACAAGTGGCACAGTGGCGGCACCCAAGGGTGTG  
ATGCACACCTTTGGTTCTCTCACCGCCAGTAAAAATGGGC  
TGCGGACCGCTTCCTTGAGTGTATTGGACCCAAGGAGGA  
GGGTGAGACATATGTATCTTACCTCCCCCTTGCTCACATT  
TTGGAGTTTATTGCTGATGTGGTGTGCTTAGCCGCGGTA  
CCTTGGTGTGTTTTGGTTTCGCCACGAACACTCACGGATGA  
TACGGCGCGACCACGAGGTGACTTGAAGGAGTTTAAGCCA  
GTGTTTATCGTTGGAGTCCCACGGATCTTTGAGACAATAC  
GGAAGGTTGTGGAAAGTCGGCTACCACCTGTGGGTAGTTT  
TAAGAGGACCTCTTTGATACTGCCTATGCTGACCGACTC  
CGTGCTCTCAAGGAGGGGAAAAGATACGCCTTTCTGGAATG  
AAAAGGTTTTTAAGGTCCCACGCGACATGTTCCGGTGGCAG

GCTGCGTGGAGTGGTATGTGGTGGCGCACCTCTCGCTGAC  
AGGACACAAGAGTTCATGCGGGTGTCTTCGGCCTTCCGC  
TGGGACAAGGCTACGGATTGACAGAAACGTGCTGCAACGG  
AAGCATAACAAGTTTGGGTGAGTTATATCCATCAGTTGGT  
CAACTCCTGAAAGGGGTTGAAGGGAGGCTATTGGATACAG  
ATGAGTACAAGCACACTGATAAGCCATTCCC GCGAGGGGA  
GCTCTGCCTTCGTGGGTTCGTTTATGTTCAAGGGCTACTAC  
AAGCAGGAGGCCATGAGCAAAGAAGTGTTGATTCCAGGGG  
GTTGGTTCCGCACGGGGGACGTTGTGGAAATTGGTGAAGA  
TAATGCCCTGCGAGTCATTGGCCGTGTTAAGGCACTGGTG  
AAGAACCTACTCGGAGAATACATTCAGCTGGAGTACCTGG  
AAGTGATTTACTCACAGCATCCATTGTCTGCCCTAATGG  
CGTCTGCATTCTTGTAATCAGCGGGCGGCATACATATGT  
GCCCTTGTAATCACCGACGAGGAAAGGGCTAAGAAGTTTG  
CCCAAGAAAATGGAATTGGTGAACGTGGCCCGAGATACT  
TAAGGACCCGACTTTCCACCAACGTGCCGCAAGTCGTTG  
TCGAATTTCCGGCGCTTCAATTGGTAGAAAACCCTTTGAAC  
TGCTCCGTCAGGTACGTGTGATCGCCGATGAGTGGACGGC  
AAAGAATGGGATGCTCACTGTCTCGATGAAAATCCGTCGC  
AACAAGGTGGAAGAAAGGTACGGCGATGTCATTGAACAAC  
TTTTCAAGTATGAGTAA

AF208112.2 AF208113 AF208114 AF208115 5789-7915 ACS2 Coding  
ATGAACACCGCTTCTGCGCTGAACGAAATCGAGGTGGCGG  
TCCTCCAGCTTATGGATGAGGCCAACAGCCGAGAATCCGC  
ACCAAACGAAGACATTGTGCAGCTTCGGAGCAAAGGCTCA  
CAGAACGAGGCGATTCCACAGACAGAAACGGAGAATATGT  
CGGCCATCTACCGTTCGTGCCGGAGTCAGTGGCGAAGAGCA  
CACACGACTCTGTGCGAGAGTGGTACTACGGTGTGAACATG  
CCACAGAAGTTCATGGCAATATGCAAGAAAGGGGGAAGTC  
GCAGGGCTTTCGCGTACCGGGTTCTGTCAAACATATCGAA  
AGAAGTGCTAAGGGACCAAAATGGGCTTGAACGTTTCATAC  
GATATAACATACTTTAAGGAAACGTGTTATATTA ACTACC  
GTGTCCTCTGGGAAAATATCGAGTCGTTTGGGCGAGGTCT  
TGTGGAGTTGGGTATTTACCAAACCTCCCGAGTCGCCATA  
TACGAGGAGACGCGGTGGGAGTGGTTGGCAACAATTTACG  
GTATCTGGTTCGCAGAATATGGTTGCCACCACAGTGTACGC  
CAATCTTGGGGAAGATGCGCTCGCGTATGCCCTCCGGGAA  
ACAGGATCCCGTGCAATTATATGCAACGCAACAATGTGC

CAACACTGGTCCGGTTGGTGCAGAGCAACCGCATTCCGCC  
CTTGGTGATCATTTACATTGGTCAGCTACCTCCGGATACA  
AAAAGCACACATTGCCGCATCATCTCTTGGCTTCATGTGC  
TGGACAATGGTTCGCTCTCAGATGAACCACTTCGAATCCC  
CACTGACAATGACCAAGTTGCTTTCATCATGTATACGAGT  
GGTACGACGGGGGACCCCAAAGGTGTCATTCACACACATG  
GCTCACTGATCTCGGGTGTACTGCTTGTGCCGACTACGT  
GAATGAACTGATTGGTCCTTACGAAGAGGGTGAGTCGTAC  
TGCGCTTACCTGCCTCTTGCCCACATATTTGAATTTGGTG  
TCGTCAACATCTTTCTTGCTCGCGGTTCTTTTGTGGGTT  
TGGAACCCCGAACAACACTTCTCGACACGTACACTCGTCCA  
CACGGTGATTACAGGGAGTACAAACCGGTTTTTCACAATTG  
GCGTGCCGCGAGTGTACGACACGATAAAGAAAACGGTTCGA  
GTCACAGCTGGCACCCCGAGGGACACTACAGCGCCGTATA  
TTCGAACACGCCTTCCAAACGAGACTTCGAGCCCTCAAGA  
AGGGTGAGGAGACCCCGTACTGGAACAGGTTAATTTTTTC  
TCCATTTCCGGTCCATGCTTGGAGGTAAGATGAAAACGATG  
CTTTCCGCGGAGGGCCCCTCAGCGCACCAACGCAAACAT  
TTCTTCATGTTGTATTTGGCATCATGCCACAAGGTTGGGG  
CCTCACGGAGACGGTGTGTGTTGGCACAAAGCAAGTCGCA  
GGTGATATGGAACCGGCCGCTGCAGGCAAGCAAGAGCGCA  
CATGTGAAATGCGACTACTGGACGTGGAAGGATACAAGCA  
CACCGATGAGCCCGATCCTCGTGGGGAAATTCTTCTGCGT  
GGTCCATTCCTCTTCAAAGGGTACTACAAGCAGGAAGAAC  
TAACCAAGGAGGTGCTTGATGAAGATGGTTGGTTTCATAC  
GGGTGACGTTGGCAGCATCGGCCCAATGGAACCCTTCGC  
ATCATTGGCCGCGTGAAGGCCTTGGCAAAGAATGTTCTTG  
GAGAGTATGTTGCCATGGAAGCTTTGGAATCCATGTATGC  
ACACAACCTCGCTGAGCATGCCCAACGGTGTTTGTGTCTC  
GTGCATCCTGACAGACCGTACATTTGTGCGCTTGTTCTTA  
CTGATGAAGCGAAGGTTGTTGCGTTCACGAGGGAGCATGG  
ATTGAAAGGTAAATACCCTGAAGTTCTGCAGGACCCCGAG  
TTTCAGAAGAAGGCTACAGCATCATTTTCAGGAGACGGCTC  
GTGCATCTGATCGACAGAAGTTTGAGATTGTACGTCACGT  
ACGCCTACTGAGTGATGAGTGGACTCCTGAAAATGGTGTG  
CTGACGGCCGCAGGCAAACCTGAAGCGACGCGTCATCGATG  
AGAAGTACACTGATACTATTGTGTCACTTTTCGTGGAGGA  
GTGCTGA

AF208112.3 AF208113 AF208114 AF208115 9313-11421 ACS3 Coding

ATGGGGGGATGTGTGATTTCGGTCATGGACTACATGAACA  
ATCGCTCTGAGGTTGAGAATGAGCATGTGAAAAAATTTG  
TGCGCTTGGCAAGGTTGCTGTCCCTGTGCCCGGCAGCGAA  
ACTTCTGATTGCTCTCCCATCTACCGTCTCGTAACTGACG  
ACGGCAAAGATATTGAAGAGGTGCGGCGGGAGTGGTACGA  
GGGTGAGTGCCCTTCCGCAGCGCTTCGCAGCCCTTTGCAAG  
CGTCAACCCAAGCAGCGTGCCCTTGCCCTACCGCCCAGTGG  
ATCGGGTAGAAAAGGCTGTAATTAAGGATCTGCACACGGG  
AACAGAGAAGACAGTGAACGTAACACATTTCAAGGAGACG  
AAATACCTTGACTACGGCACCTTCTGGGACTACATCGAGT  
CGTTTGGGCGAGGTCTCGTGGAGTTGGGTATTTACCAA  
CTCCCGAGTCGCCATATACGAGGAGACGCGGTGGGAGTGG  
TTGGCAACAATTTACGGTATCTGGTCGCAGAATATGGTTG  
CCACCACAGTGTACGCCAATCTTGGCGAAGATGCGCTCGC  
GTATGCCCTCCGGGAAACAGGCTGCAAGGGGATCATTTGC  
AATGCGAAGAATGTGAGTGTGTTATTAATTCATGAGTG  
AAGGCATCACACCTTCCGCACCCATCATCTACAATGGGAG  
CCTTCCTGCCTCTGTGCGACCAGGAGGCCTGCCATCTCGTA  
TCGTGGGAGGAAGTTGTGAAACTTGGTCGTGAGGCCCGTG  
ACCGGCTTCCGTTGAACAACCTCTGGAAGGGCAGATGACCT  
TGCTCTCATCATGTATACGAGTGGTACGACGGGGGACCCC  
AAAGGTGTCATTCACACACATGGCTCACTGATGTCGGGAG  
TTCATGCACTTGACCACAGGCTGAACGAGGTAATGGGTTG  
CCATGTTAAAGGGGAAACATACTGCGCTTACCTGCCTCTT  
GCCACATTTTGGAGTTAGGAGTCGTTAACATCTTCATTG  
CCCGCGGTGCACTGATATGCTTTGGAAGCCCCTTTACACT  
GACTGACCTCACTGCAAGGCCCGTGGTGACCTAGCAGAG  
TACAATCCATCACTTTTAATTGGCGTACCGCGCATATACG  
ATACGCTGAAGAAGGCAATTCAGGCGAAACTGCCGGCTCC  
TGGCACGTTCAAGCGTCGTGCTTTTGACCATGCCTTCCAG  
AGCCGCTTGCCTGCTTTAAGGATGGCAAAGATTCGCCGT  
ACTGGGATGCGAAGGTGTTTGCAGCTACCCGTGCCGTTTT  
GGGAAGGGAATACGAATTGCTTTGTCCGGCGGAGGCCCT  
CTGAGTACAGCCACACAAGATTTTGTTAATGTGGTTCTGG  
CTCGCACGATTCAAGGTTGGGGCCTCACGGAGACGGTGTG  
TGTCGGAGGTGTTTCAGTTTACAGGCGATATTGAAACCGGT  
GCTGTTGGACCCCGCTGCTATCGGAGGAAGTGAAACTAC



TGGACGTGGAAGGATACAAACACACCGATGAGCCCGATCC  
TCGTGGGGAAATTCTTCTGCGTGGTCCATTCCTCTTCAA  
GGTACTACAAGCAGGAAGAATAACCAAGGAGGTGCTTG  
ATGAAGATGGTTGGTTTCATACGGGTGACGTTGGCAGCAT  
CGACCCCAATGGAACCCTTCGCATCATTGGCCGCGTGAAG  
GCCTTGGCAAAGAATGTTCTTGGAGAGTATGTTGCCATGG  
AAGCTTTGGAATCCATGTATGCACACAACCTCGCTGAGCAT  
GCCCAACGGTGTGTTGTGTCCTCGTGCATCCTGACAGACCG  
TACATTTGTGCGCTTGTCTTACTGATGAAGCGAAGGTTG  
TTGCGTTCACGAGGGAGCATGGATTGAAAGGTAAATACCC  
TGAAGTTCTGCAGGACCCCGAGTTTCAGAAGAAGGCTACA  
GCATCATTTTCAGGAGACGGCTCGTGCATCTGATCGACAGA  
AGTTTGAGATTGTACGTACGTACGCCTACTGAGTGATGA  
GTGGACTCCTGAAAATGGTGCCTGACGGCTGTGGGAAAA  
CTGAAGCGACGCGTCATCGATGAGAGGTACACTGATATCA  
TAGCACCCTTTTCGTGGAGGAGTGCTGA

AF227501.1 394-1605 Rpt3 Coding

ATGACTTCACTTTTAGCGCAAACAACAATGCCGCAGTTG  
CAGGTGGTACCCCGCGGCGACGTTGAGTTTGTATGAAGA  
ACATGAGCGGCTGGTGCGAAGCATAAAAACCTTGAACTC  
AAGACGATGATCTGCAAAACAGAAACGCACCATCTCCAAA  
AGGAGGAGAGCGCAGCCAAACAGGAAGTGAAACGAATTCA  
AGCTGTCCCATTGGTACTTGGCACTTTTGTGGAGGCAGTA  
GAGGCGGGTCGTGGTATTGTAGGTGGTAGTTCGAGCAGCA  
ACTACTATGTACGCATTTTAAGCACCTTGGACAAGGAAAA  
ACTGAAACCTGGCGCAAGTGTGGGGTTGCATAAGGGCAGC  
AATTCTTGCGTCCAGATTCTTCCCAATGAAATAGACTCGG  
CGGTCCACGTTCTCCGTAAAGAAGATAGGCCAAACGTGAC  
GTACAGTGATGTGGGTGGGCTGGACATGCAAAAACAAGAA  
ATTTCGGGAAGCGGTTGAGTTACCTCTTACACATGCCTCAC  
TATACGACCAGATTGGAATCGACCCTCCACGTGGCGTTTT  
GCTCTACGGCCACCCGGCACCGGCAAAAACAATGCTTGTG  
AAAGCTGTTGCACATCACACGAATGCGGCCTTCATTAGTG  
TGGTGGGTTTCGGAATTTGTGCAGAAGTACCTTGGCGAGGG  
TCCGCGTAAGGTGCGTGATGTGTTTCGACTTGCACGAGAA  
AATGCCCCGGCAATTATTTTATAGACGAGGTTGACAGCA  
TTGCAACCAAACGTTTTTATGATGCGCAAACCGGTGCTGATCG  
TGAGGTTCAACGGGTGTTAATTGAGCTGTTGGCCCAAATG

GATGGTTTTGATCAGACA ACTAACGTGAAAGTTATCATGG  
CGACCAATCGCTGGGATACGCTGGACCCCGCAATCCTTCG  
GCCTGGACGTCTTGATCGCAAGATCGAATCCCCCTACCCC  
GATCGCCGTCAGAAACGGCTTGTCTTCCAGGTTTGTACAT  
CTCGAATGAACCTTTCACCTGAGGTTGACTTGGAGGAATT  
TGTCACGCGACCGGAACGGCTTACAGGTGCAGATATCCAG  
TCCATTTGTCATGAGGCGGGTATGTTGGCGGTGCGGAAGA  
ACAGATATGTTGTCCTACCAAAGACATTGAAAGTGCCTA  
TCGTACGGTCACTCGCAAGACGGGTGATGAACAATATGAT  
TTTTATTCGTAG

AF234189.1 814-1374 RAB11B Coding

ATGACGAACGGAACTCTGTGAAAGTTATCCTTCTTGGTG  
ACAGTGCTGTGGGGAAGTCTAAGTTGGTAGAGCGGTTTTT  
GATGCAACGATACGTGCCTGTGCAAATGTCCACATATGCA  
TTGACGCTATTCCACTATGACTTCGTTACTGAAGATGATG  
AGGCAATTGATGTTGACATTTGGGACACGGCGGGACAGGA  
GCGTTTTCTCCACTATGCATCCCGCGTATTACCACGAGGCT  
CATGCATGCATTTTGGTTTTTCGACGTCACCCGGAAGGCGA  
CGTATAAGAATTTGGAGAAGTGGTTGGGTGAGTTACGAAA  
CTACCGTGAGCACATTCCATGCATTGTAGCCTGTAATAAG  
ATAGATACAGATCCATCCGTCGTGAACAAGGCGTTCGCGT  
TCGTGGAGAAGCATAACCTTTCGCTGTTTTATGTATCGGC  
AGCTGATGGAACCAATGTGGTGCAGCTCCTCGAGTCGGCC  
ATTTCCGAGGCTGTAAAGTACAAGAAGAGCCCCAAAAAGG  
ACGACCTCATGTCGCAGGTACTTGGCTTCATCAAAGAATA  
A

AF246237.1 805-1086 ACBP Coding

ATGGTGGAGGAAACGCTTGATGAAAAGTTCCAACGGCTCT  
CGAAGACGTTAGGGGTAAAGGCTACGCGACCAAGGATGTC  
CATTCACTAAGTTAGATCTCTACGGCCTCTGGCATCAG  
GCGACGGGTGGGTCAGTCAAGACTCCCAAACCGTCGCGCG  
TGAATGTTGTGGCATCGGCCAAATGGAATGCACGCAAAA  
GTACGAAAAGTTGAGCAAAGATGAGGCAAAGAGGAAGTTT  
GTAGAGCTTGCGGAAAAGGTAGTGCCCCCGTCGAACCTGT  
AG

AF253418.1 1077-2090 PKA3 Coding

ATGAAGTCGGATGGGTGCTTGACAAGGAAGGACGTGTCCA  
GCTGGAAGCTGCAAGACCTGGAGATCCGAGAGACAATAGG

TACCGGTA CTTTTGGGCGCGTCCGCCTATGTAGACACAGG  
GCTTCTGGACAATACGTTGTTTTGAAGATTCTTAAAAAGC  
AGGAAATTTTGCATGAAACAGGTAGACCATATACTGGC  
CGAGTCGAGTATTCTACAGGAGTTGAGCCATCCATTTATT  
GTGACAATGTATAAAGGTTTTATGGATGATGACCGATTGT  
ACCTCCTCCTCGAGTATGTGGTGGGTGGCGAGCTGTTCTC  
CCACCTCCGGAAGGCGGGAAAATTCCCTAATGATGTAGCC  
AAGTTCTACTCCGCAGAAGTGGTTTTGGCGTTTGAATATA  
TTCATGAGTGCGGCATCGTATAACCGTGAAGCCAGA  
AAATGTGCTTTTGGACAAGCAGGGAAACATTAAGATTACG  
GACTTTGGGTTTCGCGAAACGCGTTAGGGACAGAACGTACA  
CGCTATGTGGGACTCCAGAGTATCTTGCGCCGGAGATAAT  
CCAAAGTAAAGGTCACGATCGGGCTGTGGATTGGTGGACA  
CTCGGAATTCCTTCTCTATGAGATGCTTGTTCGGTTATCCTC  
CTTTTTTCGACGAGAGTCCTTTTAGAACATACGAAAAAAT  
TTTAGAGGGGAAACTTCAGTTTCCAAAGTGGGTGGAGATG  
CGGGCGAAGGACCTCATAAAGAGTTTTCTAACAATTGAAC  
CAACGAAACGCCTTGGGTGAGTAAAACGTGGTGTGCAGGA  
CGTTAAGCGACACAAGTTCTACAGTGGGGTTAATTGGAAC  
GTTCTCCTACAGAGAGGTGTCGCCGCTCCCATTCACGTGC  
GTCTAAACAACGATGGTGACACTAGGTA CTTTCGATCGTTA  
TCCAGAAAGTCCTCGCCATCCACTTCAACCTTTGACTGAG  
GCACAGCAGGAGTTATTCTCGGGGTTTTGCGATGGTGAAT  
ACACGAGGWTCTGA

AF253418.2 4192-6054 PDE1 Coding

ATGTTGGAAGCGCTCCGAAAGTGCCCGACCATGTTTGCCG  
TTACATCTGATGGGTCTCTACTATGGCCAAGATGGATAA  
CTCGGCTCGGCAGCTTGCCTTTTTCGTGGCGACCACTAAT  
GGTGAGTTTTATCAAAGCAATTTTGGTGAAGAGGCTCTAG  
AGACGATCAAATATCAGCTCGGGAAAGATGCTGGGTGGGG  
ACTGTTCTTTGACGTACTTCGGAATGCGTTCAATGGCAAT  
TGCGTTAGCATTCTAGCAAGATCGGAGGATACTGCGCACA  
TTCTTTGTGGCAAAGAGGACTGTAGCGAGAAGAGTGCCT  
CTGCTTTCCCATTCAAAAA ACTGAAGAAGATACCTCGGGC  
ACGATTCTCAAATGTTTGGTTGACGCGAATGCCGTTTACG  
CAAACCCTAAGGAGGAGAAAAACAAAGTTCAAAGATAAT  
GGAGGAGCTGAAAAGGCAAAGTTGCAGGTGAGAATGCTG  
GAAGAGGAAGTGCGCGTGCTGTGTGAGAACAATATTTGGC

GTAGAAAGCAGGACACCAAGAATACTCTTAAGATTGGAAA  
ATTAAGAGACAATATTTCCCGTTTATCAAATCAAATTAAC  
CCAAAAGCAAAGGAAGTGTCGGAGACAAGTGTCGGAGAAA  
CCTCGGGTCCACATGCCGAAGACTCGTATATACCGGGAAG  
GAAACTTCTCCGCCTGGTATTTCGAGAAGAAAGAGTGCAAG  
GAATACGATGTGGAACCTTCTACGGCTAATCAAGAGTAGGT  
GGCCAAAACCTGAAGGATCGAAGGCTTGCAATGCTTCAA  
CTGCTTGATTGATCCCTACACTGAGTCAGAACTACCTGAA  
CGTCTTAGTCGAATGAGCAAAAAACACAAAATGGTTTGGG  
GGACATTAAACGGGTTGGACGATTGGGACTACAACGTGTT  
TGAGCTTCAGGCAGCTATTGATGGGGACGATATCAATTGC  
AAGAATGATCAATCTGGCTGCCGGCGCACTATTTATAACAA  
TGTACGCCCTCGTAGTCAAGTATGGTTTTCTTCGTAAATT  
TGAAATCAACGAGCGAATTTTTTTAAACTGGCTCAGTGCC  
GTCGAAGGTGGATACCATGCTAATCCGTATCATAACTCGA  
TGCACGCGGCAGACGTGCTTCATATCACACACTATCTGTT  
AAGCAAAGGCGGTCTGGCGGAGCTATGCAAGTTGAACGAC  
AGGCAAGTGCTTGCAGCCCTTTTTGCGGCGGCTATTACG  
ATTACAATCACCCCGGCATTAACAACAACCTTTAGTATACT  
GACGCAAACGTACAACGCCACGCTTTACAATGATCGTAGT  
GTGCTGGAAAATATGCACGTTGCTAGCGTATTTGAGTTAA  
TGAGAAATCCGGCGCTAAATATTTTGGCGTGCTTTTCTGA  
GGAACACTGGCGAGATTTCCGAAATACCGTTATCGACATG  
GTATTGGCCACTGACATGTCTTTGCACGAGAAGTACATGA  
CGCAATTTAAGCGTCGTTTAAGCGAGAAGCGACCTTTTAC  
GGAGGATTGTGATCAGAACCTCGCATTGGCGATGGCACTA  
AAGCTGGCTGATATTTCGAATTGTTGTCGTCCACTTCCGT  
TATACCTTAAATGGAGCGAGAGGGTGTCCGACGAGTTCTA  
CACGCAAGGTGACCGGGAGCGATCCCTGGGTATGTCATGT  
AGTCCGTTTCATGGACCGCCAAACCCCTATGATTGCTGAGG  
GACAGACGTCGTTCATAA ACTATATCTTCATTCCCTTCT  
CGAAGTGATGGCCGAGTTTCTACCCAGTATGGGATTTACA  
TTGGGTTTAGCGGCAGTTTGCAAATCCCACCGCCTGGTGG  
GTAACACTGGACAGGGAACCTAG

AF263280.1 1770-3227 PDE2A Coding

ATGTATGTGCACGACGTACGCATGTTTCGCTGATTATTGTT  
ACTGCTTTTTCTGCTTACTGAATGACGTGCCTTATTCTAT  
CTGCTGTTATCTGGCGTTTGCTCGTGGTTTACAGGACGAT

CCGCGCTTCAACCGTGAGGTTGACAAACAACCTTGGATACC  
GCACGCAGGCCATATTGTGCGAGCCCATCATACTAAATGG  
TGAGATCCTTGCTGTCGTGCAGCTCGTGAACAAGCTTGAT  
TCATCTGGAGAAGTGACTGTGTTTACGGAGGATGATCGTG  
ACACCTTCCGTGTGTTTTCTTATTTGCAGGTATATCCAT  
CAACAACCTCTCACCTGCTTGAGTTTCGCTGTGAAGGCTGGT  
CGTGAGGTGATGGAATTAATGAACACCGAGCAACATTGT  
TTAATAAGAACGTTCCCTCACGTGGAGTTAAACGAGTCAC  
TGCCATCACAAATAGAGAAAGGGAGGCTGTTCTACGTATT  
GAGTTCCCAACGTGGATGTTACGGATATTGACTTCGACT  
TGTTCCAGGCACGTGAAAGCACAGATAAACCGTTGGATGT  
CGCTGCTGCTATTGCATACAGACTACTGCTTGGAAGCGGC  
CTTCCACAAAAGTTTGTTGCTCCGACGAGGTGCTTCTTA  
ACTTCATTCTGCAATGCCGTAAGAAATACCGTAATGTCCC  
TTATCACAACCTTTTACCATGTTGTGGATGTATGCCAAACC  
ATTTACACATTCTTGACAGGGGAAATGTGTACGAGAAGC  
TAACCGAGCTTGAGTGCTTTGTGCTGCTTATCACCGCACT  
GGTGCATGATCTTGATCATATGGGATTGAACAACAGTTTC  
TACCTGAAAACAGAATCTCCACTTGGTATTCTTTCCAGTG  
CAAGTGGTAACAAGTCTGTTCTTGAGGTGCATCACTGCAA  
CCTTGCTGTTGAGATCCTCTCTGATCCGGAATCTGATGTG  
TTTGGTGGTCTGGAGGGTGCAGAGCGTACTCTTGCGTTCC  
GATCGATGATTGATTGTGTACTTGCGACAGATATGGCGAG  
ACATAGTGAATTTCTTGAGAAGTACCTAGAAATTATGAAA  
ACATCTTACAACGTTGATGATTCCGATCATCGGCAAATGA  
CAATGGATGTGCTTATGAAAGCTGGAGATATCTCTAACGT  
AACGAAACCGTTCGACGTTTTCCCGTCAGTGGGCAATGGCT  
GTGACGGAGGAGTTCTACCGTCAAGGAGACATGGAGAAGG  
AGAGGGGTGTGGAAGTATTGCCCATGTTTGACCGATCTAA  
GAATATGGAGCTTGCAAAAGGTCAAATTGGATTCATTGAC  
TTTGTCGCAGCCCATTTTTCCAGAAGATAGTTGATGCCT  
GCCTGCAAGGGATGCAATGGACAGTCGACCGTACAAAGTC  
GAACCGCGCACAGTGGGAGCGAGTTCTGGAAGCAAGGAGT  
ACAGGGGCTTCGTCTTAG

AF263280.2 4693-5073 NHP2 Coding

ATGACGGCTGAAATCAGCGAAAAGGCTTTCCCTCTTGCTG  
GCGATCGCCTCACGCAGACCATCCTGGACATAGTACAGGA  
AGCCAGTAATGCAAAGATGATTAAGAAGGGAGCCAATGAG

GCCACGAAGGCGCTCAACCGTGGTATTGCGGACCTGATCG  
TGCTTGCGGGCGATACGAACCCCATCGAGATCCTTCTTCA  
CCTCCCGCTTCTATGCGAAGACAAAAATGTGCCGTACGTG  
TTTGTTCCTCAAAGACGGCATTAGGGCGCGCGGCGCAAG  
TGTCACGGAATGCGGTGGCTCTAGCGATCCTCCAGATGGA  
GAACAGCCCCATTTTCGGCTAAGATACAGGCGGTTAAATTG  
GAGATTGAACGGCTCCTGTAG

AF290945.1 349-1005 *Trypanosoma brucei* 20S proteasome beta 7 subunit  
mRNA, complete Coding

ATGGCATCTGGAGGATCTGTTATTGGTCTGAAATATAACG  
GTGGTGTCTGTTGGCTAGCGACACACTTTTATCGTATGG  
ATCCCTTGCGAAATGGCCAAATATCCCGCGTATTAATAATC  
ATAGGCCCCCATACCGCCGTGTGTGCTACTGGCGACTACG  
CTGACTTTCAAGATATGACTGAACAACCTTGAGAGTCATGT  
GGAGCGACAGCGGAGATACATCAATGATGTGCTTAGGCCT  
GATGAAATATTTTGTATCTCCACCGGCATATTTACCATA  
AACGCTCCAATTTTGAGCCATGCCTTTGCAGTTTTGTGT  
CTGTGGTTGTCAAGGAGGAGTTCCATTTCTTGGTGGAATT  
GACAGTGTGGGGACGCAATGGAGGGATGACTGCGTGGCTA  
CGGGATATGGAGCATATATTGCAATCCACTACTACGGAA  
GGCGCTTGAAAAACCTGGTGGACTCTCACGTGAGGAGGCG  
GTGGAGGTTATCAAAAACCTGTCTTCGTGTTCTTTTCTACC  
GGGAGTGCCGCGCCATCAACAAGTTTCAAATTGCAGATGC  
GACAAATGACGCTGTGGAGATTGGCAAGCCGTTTGAAGTA  
GAAACAAATTGGGAGTACGAGGGGTTCTGCTTTGAGAAAA  
CAGCCATTATTCGATGA

AF301417.1 178-1464 PAG2 Coding

ATGGTCTCTTTGATTATCCTTTTTTCGCTTGACCTTTGCCA  
TCGCGAATAGGGTTTCGCACGCTCATGAAGGTATTAGTGAT  
TGTGTCTTTTTTGTACTTACTGGTAGCGCCTCCGCGGAC  
AGTGGCGCACTGAGTTTGAGTGGAGCTGCGGAGGCGCTCT  
GTAATGCGTCTGAAGAGGCTGAAATCGGTGTATGCCTTCGT  
CCAAGCGAAAACCTAAGTATGCAACCGAGAAGGTGAGGGAG  
TTTGAGGATATGGTGGAGTTGGTGAGGTTAAAGATTGTGA  
GGGTTAGGGGAAATGAAGGGGGAAATGGCAATTGGACCTC  
GTGCACGGGGATCGCGAAGTTTTTGAACGTGTGGGGAGT  
AAAGTGAATAGGGTGAAGAGGAGAGAATTGAAGAGGTTGA  
GATATCTTGGATACTCAGCGGTAGGGGCAGCAGGGATAGC

GGCGGGGAGGTTGGATGAGTTCGTTAGTGTTTTCCAGCAA  
CCGAATAACAGAAACGGGGTTGAATTTTTTTCTTGCGCTG  
CGGGTGCACGAGGTGAAGCAGCAACTAAGGCGGAGCTTCA  
CGATTGTTTTCAAGGGGGGAAAACGGCTGTAGATGCTGCA  
GAATTCCTCTCTGTAGAGGATGTTGAAGAGAAAAAGGGTT  
CACAAGCGGAGGGCAGAGCAAACCTGGAGGAAGCAATTAG  
AAGGCACCTAAAGCTGAGCAATAACGACCCAAGATACACG  
GGAGGGGAGTCACAGGGGTGTCAGCTGGTGCGCGGAAGTT  
CGGGGGGAGGATACCTGGGAAACGCGAGCCTCACGACTAA  
CTTGCTTTGGGGCGATGGAATCTTTGGAGTAAAGAAAGAT  
GGAGTTGGCGAAACCGCATACATAGGAGATACGAGGAATG  
AGACATATAGTTACGATATGATGTGGGAGGAAAATCCAAC  
AACAAACGTCCCCACACTGAGGGCAGCAATGGATGCTTAC  
CGGGCGTTTGAAGAGCAGGTAAGTGAGTACGGCGACATAT  
ATAGGAGTCTCACGGAGGAGTGGACAGAAAAACTATTGG  
GAGGAGGGCGGATGCCATGAAAATACTAAATGGACTAGGA  
AGTCTTCCAATTGAAAACGTTTCCGCGCTGAATAGCCGTA  
CTAAACAGGATTGGCTCTCGGCAAGTCAGGTAAAGGATGC  
CGACAAAGATCTTCTGATGACGGAGATTGGGTTGTGTGGA  
GGGTGTTGGGAGGAGGAGCTTCTTCCGAAGAATGTTGAGAA  
AGGCGTGGAGGAAGATATTTGGCGGAAATTGGGGAAAGGA  
CGACTAA

AF301417.2 1710-2702 PAG4 Coding

ATGCTGAAGAGTGGCGTGTACAGACATGTTTTGACTAAGA  
CGGAGGCGGTGCGAAAAGATGATGGAAAAGGTGAGTCACAT  
GGGGAATTATGCGAAACTGAAGGTATTGAGAAGTAATTCG  
AGTGGCTTCGAGTGTACCAAGGCGAAGGTGTTTATAACAT  
ATACCCTTGAAGGGAAGAAAGCGATGATAAGGAAACTCGT  
GAAGAACTGTGGGACGTCGGGACAAAACCTTGTGGCAGCC  
GCGTCACTAGCAGCGGGGAGACTGGATGAAATGTTAAGTG  
TTTTCGTGGGGCCTATTGGGGGAAACGATAACAATAGCTA  
TTGTGCCAAAGATCGCCAAAACCTTACGGGGTGCTTTGGG  
ACGGCAAGTTTTCGACGGCACTGGGGCTAGTGAAGACGGCG  
GTTTTGATGGTGATGGAAAGGAATTTGCAACCATGTTGGA  
TGAAGCACTGCAGCTTAACAACACCGATCCACTGGAAAGC  
AGTGGTGCGAACTGCCACCTGACGAAGGGAGGAAATGGTG  
GGGGCTATCTTGTGCACATGGATTCCCGTAATAAAGGCTA  
CAAATCGAGCCAACAAAACACATTACCTGGGGTGACGGG

ATGCTCGGCATTAAGAAGGGCGGGGAAGCCAGCTCTGGAG  
CAAAGGGCACAGTTCGTGGAAGTTCTTACAGTTCAGATGT  
CGTATGGGAGGAACACCCGACCAAGACAGTGCCGACCCTG  
ACATCGACCGCGAAACTTTTTGGAGAGTTTCAGAAGATCA  
ACAAGGAGGTGCTGGCAGTGGTTGAGGATGCACTGGAAAG  
CTTGCAGGAAAAGAATATGACGACAAGCAAGGACACGAGC  
GGTAGCGGGAAACGGCTTCTTGACTACATGATCAGAAGGT  
GTGGGAATTTACACACAAGCGACAAAAGAATTTTTTTGG  
GACTCGGCGGTGCATTCGCATGGTGATTGGAGGGTTCGG  
TTGGTAATTTGCTTGTGCTGCGATGGTTTAA

AF319546.1 370-2832 *Trypanosoma brucei* C-terminal kinesin KIFC1 gene,  
complete cds. TBKIFC1 Coding

ATGTCTGCGGAACAACCCGAGCAGCAAATAAGTGGACTTC  
TGGAGCAGCTGTACCACAGTTCACACGTGTCCGCAGAGCG  
TGAAACCATTATGAACCTGTGCAACGTCGTCAGGCAAGGA  
GGCGCAGAGTTTCTGCTTGACGTCGTCAAACCAATTTGA  
AGAGTGGAGTGCCCGAAAAGCAGGAGGCAAGTATGACCAT  
TCTGGACGAGGTGACTCTCAACTGTGGTCCGTCGTTTGCT  
GTCATGCTTTCCTCGCAAAGTGGATGGATCGCCTTATCA  
AGTTGGCTAAGGCAGGGCCGACAAAGTAACTACCAAGAT  
AATTTCTACTGTCATTGGGTGGCAAAGCGGTACCACACT  
GTTTCCTTTGCCCAGTGCATCAAGAAGCTGTCTCAGAGCA  
AAACTACGGGTGAGGCGTGCAAGCAGGCACTGCGTCAGGC  
AGGGGATGATGGTACCGGGTCCCTCACTGGGTTACGACGCG  
AGCTCTCCTGCTTCTCTGCGTTCGACAGGAGTAACCGACA  
GCCGGAAAAGTAAGAAGTGCGATGCCGTGTTGGCCGAGCT  
TCAGAGTGACCTTGTTTTCTCTGGAGTACTCCCTTGAGAAC  
CCCAAGTTTGTCCAGGATGATGCCATTGCAAGGGAGTGCA  
AGAATCACAAGATGAAGTGCATGCAAATGTTGGAATCAGG  
AAGCTATGAAAGCATTGCATCTGATCTTATGCAGTTGATT  
GAGCGCTTTTCCCGCGCTCTCGAGCTCTACGAATGCATGA  
CAGGCGTTGATTTGGGTGAGGGTGAAGCGGCAAGGTGCGC  
GGCTCTGACGAGGGGTAAGGATAATGGCGGTGACAGTGAT  
GACGAGTACTCGAAACAACCTCCGTGCTCGCGTTGCGCCTA  
AAAATGCCCAACAAGTTATGCTTCAGGCTCAGGAAGCTAC  
ACAGCAGCTCGTGGAGAAGGAGCGTCATGAAACGATGCAG  
CTGCGTACTCAGCTTGAGGAAATGCGCCGTAAGTACGAAG  
ACATGCATAACAAATACAAGGATGCTAAGGCAAGAAATAA



AGAAGCGGTGGGTGCCTTGCAGGAGTATGCTAAACGCATA  
GAGGTGCTCGAGAAAAGCGGGGGCGGCCGCGCAGCCGCCG  
CTGCCGCACTGCCACCACCACCGCCTATTTCTGAAGAGAA  
AGACAAAGGAAAAGATAAATCGGGACCTGCCCTTAATGTG  
GGGCCGATAGCAACGGCCATGAGGGACACTGTGCAGGTTT  
TACGGCAGTCGCTGCGTGAGGTGCGGGAGCAGTACGTAAG  
CGATATCCAAAAGGAAAGCGCATATTACTCCTCTCAGCTC  
ACTAGTGCTATTGCTTTCGATTGCCGCTGCTGCCGAAAAGG  
ATCGCGGTTCTAACAGCCAACCTGTTGGTTCGCACCCAGGA  
GTTGTATAAGAGGGAAATGAAGCTGCGTAAGCAGTACTAC  
AACCAGATTCAGGAGTTGAAAGGCAACATTCGTGTGTATT  
GCCGTGTTTCGTCCCCTGCTACCAAGGGAAGTTGCTGCTGG  
CCATACGAATATTATGGACTTCCCCTCTGCCGACGAGATC  
AGGGTCAACGACCCCGCTGGCCGGCAGAAGGTTTACGAGT  
TTGATGAAGTGTACCCGCCGCATGCACCCGACGGCCCGTGT  
CTTTGAAGACACGTTCGCTCTCATTGACAGCGTTGTGGAT  
GGCTACAATGTTTGCATCTTTGCCTACGGCCAAACGGGAA  
GTGGCAAGACCCATAACAATGGGTGGGTACGGGGAAGACAG  
AGGTATCAACACCCGTGCCTTGCAGCGACTGTTTGAGATC  
ATTGACGAACGTAAGGACACTGATGAATCTACCGTTACCG  
TCTCTGTGCTTGAAATCTATTGCGAGATGATCCGAGACCT  
GCTGGTTCCGAAGGAGAAGTCCAAGTCCACGACTTATGAG  
GTGAAGCAGGGTGGCCAGTTCGGTACCTATGTGACAAACC  
TTTCCGAAGTTCCCGTTCAGTGCGCTGACGAAATTACAAA  
GATTATGGAGAACGCAAACAAAACCGCAGTGAGGGCCAG  
ACGAATATGAATGAACACTCTTCCCGATCCCATATGGTTT  
TGTATATCACTGTCCGAACAACGAACAAGGAAACCAATAT  
GCAGTGCTTTGGTAAGCTCTCGCTTATTGACTTGGCGGGA  
AGTGAGCGTCTCGACAAGACAGGTGCAGAGGGACAGATGT  
TGAAGGAGGCTGTGGCTATCAACAAGTCGCTATCGTTCGCT  
GGGAGATGTCATCTCCGGGCTGGCGCAGAACAGCAAGCAC  
ATCCCATTCGTAACCTCCGTGCTGACGTACTTGCTGCAAG  
ACTCCATGGGTGGACAGGCAAAAGTTTTGATGTTTGTCTG  
CGTCAACCCTGCAAGTTACAACGCCAGTGAAAGTAACAGT  
TCGCTTCAATTTGCCTCTCGCGCTCGTGGCGTATCTCTTG  
GCCAGATCAAGAAGAATCCATAA

AF326975.2 1838-3337 RSU Coding

ATGTCTGAAAAGGGAACATCGTTAAACCTATTCCTCGCCG

CCTGCCAAAAGGAGGGTGTGAAGCAACCCAACACATTTCT  
TGTCGAGTTCTTTACGAAAAACCTGAACTGTTCGGAAGTG  
GAGGAAATAGACTTGAGCAAGAACTACATTGGGAACCGTG  
GTATTCCTTGCCTTACTCGATGTAATTAGCGAGCTGCCATG  
CTTTCGCTTCCTCAACTGCTCAAACCAAAAACCTGTATAAC  
ACGGACTTGAATGAGGATAGCGTTAGAGGTAACGCCACAA  
TAGATCGCATCGTCGACGTTTTCAAATCACATCCAACAGC  
CAACGCATTAGATCTCAGCCACAATCCTATTTCAAACCTAT  
GCTGGCCGTAGATTATTGTTGCTTACCCAAAATAACAAGC  
GCATCTGCCGTGTGGAATTGGTGGACACTCGCATTGACTT  
TGAACTCCGCTCTCGCATTACGCAACAATGTGAAAAGAAT  
ACCATCGCTATTTGGGAGTCACAAGCACAAGAAAAGGAGG  
AGGAACGCGCCTTTGGTGAAAGTGTACCGTGGGTCCCAAC  
ACAAACGTCTGCGGACTTGACGGCAATCGGTGGCGGCCGG  
AAGCGACGTACTACAGTGCGAGGTGAGGGAATTGATCCTG  
AGAGGGCTAAATCATATGTTGCACCATATTTTCGAGAAGAG  
TGAAGACGAAACGGCACTCATCTTGAAGTTGTTGACGTAT  
AACGTGCTCTTCTCCTTTCTGGACTCACGCGATCTTATGA  
CTGTGGCAGGTGCCATGTGGCGTGTGGAGTTCAAGCAGGA  
TGATTGCATTATGGAGGCGGGGCAGACAACATGTGACAAA  
CTGTATATAATTCAAGATGGTAAAGCAGATATCATTAAAG  
AAGGACAGAAGGTGTATCTCAAGGTAGAAGGTACGGCGGT  
AGGAGAGCTTGAACCTTATGTATCAGACACCAACTGTTGCC  
ACGGTGAAGGTTTGCACACCGGAGCTCATCGCATGGGCAC  
TCGATCGCGACACGTATCGTCACCTCGTGATGGGTAGTGC  
CATCCGCCGCCGTGAGACATATATTC AATTCCTAACA AAT  
ATTCCGTTCCCTCAGTGGCCTTGACAATTATGAGAAGCTGC  
AACTTGCGGATGCCCTCAGCAGCGACGAGTTTGAACCGGG  
TGATTACATCATTTCGCTACGGAGAGGAGGGCGAATGGCTG  
TACATCATTTTGG AAGGTTCTGTTAATGTGGTTGGGCGGG  
ATGACGATGGAAATGAAAAGCATGTTTGGGAATTCGGGAA  
GGGGGACCATGTGGGTGAGCTGGAATTCCTTAACAATCAC  
GCCAATGTAGCAGATGTTGTGGCAAAAACGCATGTTGTCA  
CGGCGAAGCTTAACCGTAGGCACTTTGAAATGTGCCTTGG  
ACCTGTCATTGATGTACTGAAACGAACCTCGCAGCAGCCA  
AACTATGAGTACTACCAGTCGAAACTGAAAAC TACTTTAA  
GGGCAGAGGGGAGGAAGTAG

AF355600.1 1-420 Trypanosoma brucei rhodesiense zinc finger protein 2 gene, complete Coding

ATGGCCTTCAACCAACGCTTTGACCGTGGGGCTCAGCCCT  
CTTATGCAGCCGTGCAACTTCCCCCGGGTGGCAAATGGC  
TTATTCGGTAGAGGGCGAAGTTTATTACATTGACCACAAC  
ACCCGCACAACACATTGGAAAATTCCTCAAGAGGTGCTTA  
ATGAGATGTACCATCAGGGTCAAACCTTACCGCCCTTCACG  
CAGCCGCCGCGGCATCGACCGCTCCAAAATGAAGACGAAG  
ATGTGCATGAACATTCAAAACGGCGGTAAATGTACGTGGG  
GTAACGCGTGTGCCTTTGCTCACAGTTCGGAGGAACTTGC  
GGCAGTACCCACAATGGCGGTGGCCAGCGCATGAGGATG  
GATCCTGGTGCACATCAAGGCAATGATAATGGGTTAGATA  
ATAACCATCTGCAGCAGTAG

AF404111.1 316-3051 Rpn1 Coding

ATGTCGGACAACAGAAAAGCAGTGGACGTTACCGTTCTGT  
CAGAGGATCCTAAGAAGAAAATGAGAAGAAAGCACG  
TGAGGCTGAGTCGCTCAAATGAGTGAAGAGGATGAACGC  
ATAAAAGGCCAAGTTGAACTTCTTGTTACGCGCGTGGGCG  
ACAGCAACACTGAGTTGGCAGCGGTTGCGGTTGATCAACT  
GATTGATTTGCTGCGGACGCACACAAGCGGCAGCGTGGCA  
TCGGTTCCAAAACCACTCAAGTATGTCCGCTCCATGTACG  
GGCAATTGGAGAGGGTTCAGAAAGAGACTACTAACCCCTAA  
GCTCGCTGTTGCGCTCCACGACGTACTIONTTCTTTTCGTGGCT  
ATGACTATTGAGTTCCCTGATGGCCAGCGTCCGGCTCTAG  
AGCACAAATTGCTAGGTACTIONCAAGATGATCTCGCCATTG  
GGGTCACGAGTATCTCCGCTTCCTCGCCGGGTGCATTAGT  
ACAGAATGGAAGGAACGTGTTAGCAAGGGAGAAAGTGTCG  
TCCACTTGATGGCTTTGTTCAACAAATTGTGAGCTATAT  
GGTGAAACACCAGGATGAACCTACAGCCGTCGACCTCCTT  
ATGGAAGTGGAGAACATCAAAGCAATCATTCCATTTATTG  
ATGGTCACAACCACAGGCGTATTGCATCTTACTTGGCTGC  
TGCGAGTAAGTATTTAACTCGTCCAATGGACACTGAGGCT  
CTCCGTGTGGTGTATGATATTTATGTAAAAATGGAATCGT  
ACACGGAGGCTCTCTTTGTAGCCTTGCAGTTAGGTGATCG  
TGCTGCCGTGGAGAACCTCTTCAAATGTGCGAGAAGTCT  
TCTGTAAGCTTGCAGATGGCGCTGAGTTGTGCGCGCTATA  
GGTTTTTCTTCCAAACGACAATGAGGAACAAGGAATTCT  
CTCTAGTGCTAACGGTAATATGAAACTTTCAGAGCTGTAT

CGTCACGTGCGAACGGAGCTTGATGCTATGACTCCGCTGA  
CACCCGAGGATATATTTAAGACAGGTCTTGACGGGAAGCA  
GTCCAGCAGTGCCTCTGACAGCTCCTTCAAACCTTGCATGT  
TCCTTCGCTAGTGGTCTCGTAAACTGTGGATATGGTAAGG  
ATATGTATTTGACAGGTGAGGAAGCCACGTGGCCCAGTGA  
GCAAACCTGATAACCGCCTCTTCGCAACAACATCCATGTTG  
GGACTTATTCATCTATGGGATCACGCGGACGGTCTACTGG  
AAATTGAAAAATACCTCCACTCAGATGCTGTCAATATCAG  
AGCTGGTGGCTTGCCTGGCCACTGGTATTTCCCTATGCGGG  
GTGAGCCATCCCTACGACCCTGCTCTTGGACTCCTCAACG  
ATTTTGTGTGTGCCCCGCATAAAGAGGTCAGGATTGGTGC  
TATTCCTTGGCTTAGGTTACGCTTATGCAGGGTCGATGCGG  
GAGGAAATAAGGGAATTGTTGGTACCAATCCTTATCGATG  
GCGAACAAACAATGGAGGTTTCAGTGTTTGACAGCGCTTGC  
ACTTTCAATGGTTTTTCGTGCGCTCCACAGACGAGGGGATG  
GTCGAGACGATAACGCATATTCTTTTGGAGATGCCAGAAA  
AGGACCTAAAGGAATCCGCCACCTGCTACATTATCCTTGC  
ACTGGGCTGCCTGTTTCTTGGACGGCAAGAAGCTGCTGAT  
ACTCTTCTGGACACTTTGCAAACATCTTCACCTATTATAA  
GACGTTATGCAGAGATCGTAGTGCGTAGCTGCGCCTACGC  
GGCAACAGGGAACGTGGTTGTCATCCAGAACTTCTTTAC  
GCAATCGCCGAGAACGATGAGCCTGAAGATACTGAGGTTTC  
CTGCGGCCGAGGGCGACGGAAATGGTCAACAGCAGAAAAA  
AAACCGACAGCAGCAGTCCACAGAGAATGCAGCGCATTTA  
AACTATAAGGCCGCTGCAGTACTTGGTATTGCATTGGTTG  
CCCTTGGAGAGGATATTGGAACAGAGATGGCCAAGCGTTC  
TATCATTCATACACTTCTCGTCGACACGGTGAGCAAAGGT  
GAGGCAAATATATCGGGCAGGCATGCCATACCCCTGGCGT  
ACGCATTGCTTTTCAGCATCCAACCCCGGTATGCAGGTCGT  
AGAGACACTCAACCGCCTTTTACACGACAGCGACATGCTC  
ACTGCAATAAATGCTATTGTGGCCATGGGTATAGTGGCTG  
CAGGAAGTAACAACGCCAGGGTTGTGAGCAAACCTACGGAA  
CCTCGCTTTATATTACCAGAAAGATCGCTTCGCTTCTTAT  
CTTTTCTCGGTGAGACTTGCGCAGGGGTTTACAATGATGG  
GTAGGGGCCATTTAACCCCTTCCCCATTGTTGAATGACCG  
TTCACTGGTTTCCCCACGGCACTCATGGGGTTGCTTGTA  
TTTTTACACAGCGCTCTGAACTTCGAGGAAATCATCCTCG  
GTAAGTACAGCTATATGGTCTCCAGTATTGCTCCCAGCAT

TAACCCGCGCATGGTGCTTGCAGTTGATGATCAGATGGAA  
GTTGTTAAAGATGGCGTGCAGGTGCGCGTGGGATTGCCTG  
TTGATACCGTTCGCTGTTGCTGGGAAACCGAAATCCATCAC  
AGGTTTCCAGACTCAAACCACACCAACGCTTATTAGCGTC  
ACAGACAAGGTAGAGGTTGCCTCTCAGAAGTACAGGCCGG  
TTGCCAGCGTTGTGGAGGGTACATTTGTTGTGGAAGAGAA  
ACCAAATGTGGAGTAG

AF421892.1 1413-2579 HDO1 Coding

ATGAATGAGGATGGTGATTGTTCGGCGCGTTCGCTCTCATTG  
ACACATCTTGCTATTCCGCTGATTGTACGCTCTCAGCGTT  
GGTTCCTCAGCATGCAATGAAACCGTATAGACTTTTGGTG  
ACAATGGAACATAATTGCATCACTGGGGTTAAAGCGGTTTT  
GTCGGACGGTTGTCCCGCCACCAATTGGTATTAAAGAGCT  
GCTTACCTACCATGCTGAAGATTATGTACTGAATCTGGGA  
CTTCATAGTAACCGCAGCTGGTTGTGGAATACAGAGGTAT  
CGAAGGTTACCTTTTCCGGAGATTGTCCACCTGTTGAGGG  
AATTGTTGAATATTCTCTCTCAACAGTTAGTGGCTCCCTC  
ATGGCCGCTGTTTTGCTGAATAGTGGTGCTGTGCATACAG  
CGATTCATTGGGGTGGTGGTATGCATCATGCAAATGCGG  
TGAGTGTTCTGGATTCTGTTACGTGAATGATATTGTTATC  
GCCATTATTGAGCTACTGAAATGCCATGATAGAGTTTTAT  
ATGTTGATCTTGATATGCATCACGGAGACGGAGTCGACGA  
AGCGTTTTTGCCGTAGCAGAAGAGTCTTTACTCTTTCCCTT  
CACAAGTTTTGGCGAGTCCTTTTTTCCGGGTACAGGCCATC  
CACGGGATGTAGGCATTGGGAACGGGCGCCACTACACTAT  
GAACTTAGCCTTGTGGGATGGTGTGGATGACTTCTACTAC  
ACCACAGTTTTTTGAGCGTGCCTCAGATCCATTGTAAGAC  
GGTTCAATCCAAATGTAGTTGTCTTGCAGTGTGGAGCCGA  
TTCGCTCGCAGGAGATCGTTTTGGGACATTTTAATCTCTCG  
TCATGGGGTCATGGAAAGTGTGTTGAAGAGGTAAAGAAAT  
TAGGGCTACCAATGCTTGTGGTTGGTGGTGGTGGTTACAC  
CCTGCCGAACGTTGCCAAGCTGTGGGCATACGAAACTAGC  
ATACTCTGTGGGAAAAGGCTCCCCTTGAACACTGTCATTC  
CTCTACATCGAATGCCTCTTAGTGGATGGCTCTTCGAAGA  
ATCGCCACAACCTTTTAGTTTTACAGGATGAAGAAAACAAA  
CCTCTTCCCTGGTGTAAACGTTCAACGATCCTTCCGCGTGA  
TTATTGAGCAAATAGACAAGCACTGTCCAAATATAATGAC  
TGTTTGA

AF421894.1 584-2344 HDO4 Coding

ATGTCTGTGAGGGAACGGAATAAAAATCCCTGGGCTCATG  
GGCGCCAGCTGGATCTTGACGGTGACGTGACTGTTAGGTG  
CCAAGCGGACCCACGACTCTGCACAACCGCTGCTATCCGT  
CGTGGAAAGCTGGTGGAGCCGGTTGATCAAGTGGCGCTCC  
GTGTAGGTGTGGAAGCTTCAGGTGTTGAAAGTCTCGTCGA  
CGCCAAGGAATCACCTTTTTTGGAAAGTCTAAAAAATGGA  
ATGGAAGTGTTTCGTTTCTGGACCTGCCATGTTGGATGCTG  
CCAAGACGGATAATGATAATAGTGACCTGTTTCTACCGGA  
CGTGTCAGTTGCATGGGCATACGATCCTAGAGTGCTTGAG  
CACGTTCCCCCGTTGACCGTGTGCCGAAACACCCTATC  
GTTTGCAGCGCGCTGTTGAGGCACTACGCTCGGCGCCGCG  
TGCTGCTCATTTTTTGCCTATGGAAGTCAAAGTTCTGGA  
GAAAGTCCCCTCCTCGTGAAGGTGCGCCTGTGGGAACTG  
GTGCAACAGCAGGCGAGACGCCGTCCGCGGCGCCAGCGG  
AACTCCGTTATGGATTCCGCCCGTTTAGCAACGCTAGAT  
GAAGTTACATTGTGTCACAATATTCATCGCTACCGATGTT  
TTATTGAAGAGGGCACAGCATTACTCCCTCCACTTAAGAC  
AGATGTGTATTGCAACGGTAAAACGAGCAGTATAGCGACT  
CGGTTGTCTGTTCGGTGCGGTGGTTGATGCAGCGCGTCGCG  
CCCTCAGTGGCTCTCCGGCATTGCTTTTTTGCCTTGTTTCG  
CCCTCCGGGACACCATGCCAGCGCTGACACCCCGAGCGGC  
TTTTGTTTGGTGAATAATGTTGCGATTGCCGCAATGCAGT  
TGTTGCAAGACTGGCACGTTAAATACGATTGTGGCGTTGG  
AGGTAGCCGTTTCAGTTCCCTCCGAAGAAAGGGATATACCA  
GAGCGACCTCGCATAGCCATAGTTGACATCGACGTACACC  
ATGGTGAGGGAACCTCAGTCATTTGTTGAAGTTGAGCCGCA  
ACTTCTGTACCTCTCTCTTCATCGTTATGACCGAGGTTCT  
TTTTACCCGTGTGATCCCGCTGGTGCACCTCCTATGTTG  
GCCAACATCGTAATATTTGCAACGTCGCTGTTGACACCGC  
GGCTACCGACCCTGCGCGTTGCGAAGAGGTTATAAGTGAT  
ATGCTTTTTTGCGCGTGTTCGTTGACGATGTGTTTTTACCAA  
GGTTGGAACAATTCACCCTAATATCATCCTACTTTCGCT  
TGCTTCGACGCGCGCACGGCGATCCACTTGGGCGGATG  
GCTGTGGAAGGAGGGTTTTCGCTATGTGGTTTCGTGCGCTAA  
AGCGATTTTGCCTGCAGTCGCAAGGGACCATCGGTTTGGT  
GGCGTACTAGAGGGTGGGTACTCACCAGAGGGTGTTTCC  
CGTGGCGTTGTCAGCGTCGCGCACGCCCTGTGTTATCCAT

TTGACGATGTAGCAGTGGTTAATTATGCACGCCTGCGGAC  
CCCAAAGACATGGATGGAGCTACGCAGTCGTCTTTCCCGG  
CGGATGGAGGTGCGAACGGATGAAACGGGAGGGGCCACGT  
CTTTGTCTGTCTGGTTTGTCTTCTCAAGGGTTGGGGGATGC  
TACGTCAACGGAAAGGGCAATAGCGGACGACGACGTGCTT  
ATGGAGCGTCACGTAGCGTGGTGGCACAAGCTTGTTAAAC  
GAGTATTGGCTATACATGCGGAGTCCAATATCATCAAGTG  
A

AJ005114.1 2196-2852 PEX11 Coding

ATGTCTGAGTTCCAAAGGTTTGTAAAGCTTCTTGAGCAGA  
CAGATGGCCGCGACAAGATTCTAAAGGCATTTTCTGGTGT  
CTTTAAGGCACTTGGCTCCCTCGACACCTGTCAGAGCCGC  
TCAAGTGCGTTTGGCGCCGTCGGGAAGTCTATTGGAGACG  
CCCGTTGTCTCCTTTCGTATGGCGAAGTGGGTGGGTGATGT  
GCCCAAGATGCAGAATGCCATTCAGGATTGCAGGGCAAAG  
GGCAAGGTCAACATGAAAGAGGTCTTGAAGTTCCTCCGCG  
TGCTGTGCAACTTCCTCTATGTGCTCGGCGACAATGTGGC  
CTTCGTGCGCCCGCGCAATTCTGGGGATTCTTCCTTGCCGC  
TGTACTIONGATGTTGTTGCCCTTTACGGTGGCGCTTCAGAAG  
CGTGCGAGTGACCCCGCCACAAGCAAGAAGGAGATGAAGG  
CAGCACTTATCAGTTTTCGTAAAGGATGCCTCGGACACCCT  
CGTAACAATGGCCTTTGTTGGTTACCTCCGTGAAGTCTGG  
CGACCCAGCGCGACAATTCTGGAGCTCTCACTGCAGTTG  
CTGGTGGTGTGCAACGTATTTGAACTGGAACAAGATCAA  
ATAGACAAGGGTCACAGGCTGCCAGCCGCGGAAACTGGC  
CGCTGCGCGACGTGA

AJ131148.1 270-1070 Trypanosoma brucei rhodesiense mRNA for proteasome subunit alpha-6. Coding

ATGTTTAAAAACCAGTACGACACGGATACCACCACGTGGA  
GCCCCACCGGGAGGTTGTTTCAAGTGGAATACGCAAATGA  
GGCGGTGAACAATGGCTCCGCTGCGGTTGGAGTTAAGGGC  
GCCGATTATGTCGTACTIONCACGGCCTTCAAACGCAATCCCG  
TGTCAGGGCTATCATCCTATCAAGAGAAGGCATTCAAATT  
GGATGAGCACGTTGGTATGGCAATCAGTGGCCTCGTGGCA  
GACGGCCGTGCGCTCTCTCGTTTTCTACGTACAGAATGTA  
TGAATTATCGCTACATGCACGATAGCGACGCTCCACTTGT  
TATGCTTGCTGACATAGTGGGCGCGAAGCACCAGCGCCAC  
ATTCAATTTGCGGGTAAGCGTCCCTTTGGTGTGGTCTCT

TAATTGCCGGTTATGATCGCCAGGGGCCACGCCTTTACCA  
AACGGTGCCCTCAGGTGATGTGTTTGATTTTAAGGCAACC  
GCGATGGGGTTGCGTTCTCAGGCAGCACGTACCTACTTGG  
AGAGGCACTTTAGAGGGTTTCCCGCGTGTGATTTGGACGA  
GTTGGTTATGCATGCGTTGAGGGCTCTTGCGCGGGCGACC  
TCTGGTGGTGTAGAACTGAACATTA AAAACACCACCATTG  
CCATTGTAGGAAAGGGCACCCCTTTACTATTCTCACGGA  
AGAAGAGGCGCGCAAGTATCTGGATGGGTTTAAGACGCGC  
CCAGAAGACATCCCCGCGTTGCCGACAACGAAGAGGATG  
ATGATGAATTACACGAGCAACCCCTGACGTTGAGGAGTG  
A

AJ297265.1 1-1350 rhodesain Coding

ATGCCTCGAACAGAAATGGTGCGTTTTGTACGTCTCCCCG  
TTGTCTTGCTGGCTATGGCAGCGTGCCTTGCGTCTGTGCG  
ACTCGGGTCGCTCCACGTGGAGGAGTCATTGGAGATGCGT  
TTTGCTGCGTTCAAGAAGAAGTACGGCAAGGTGTACAAGG  
ATGCTAAGGAGGAAGCATTCCGCTTCCGTGCCTTTGAGGA  
GAATATGGAGCAGGCGAAGATTCAAGCTGCGGCGAACCCA  
TACGCAACGTTTGGTGTGACACCCTTCTCGGATATGACAC  
GTGAAGAGTTCAGGGCACGCTACCGTAACGGCGCGTCCTA  
CTTTGCAGCTGCGCAGAAGCGGCTACGCAAGACGGTGAAC  
GTAACCCTGGCCGTGCTCCTGCAGCTGTGGATTGGCGTG  
AGAAGGGAGCAGTGACCCAGTGAAGGATCAGGGTCAGTG  
CGGCTCGTGCTGGGCCTTTTCAACTATCGGCAACATCGAA  
GGGCAGTGGCAGGTGGCAGGAAATCCTCTCGTATCCCTCT  
CGGAGCAGATGCTAGTGTGATGATAACCATTGATTTCCG  
CTGTGGTGGTGGGCTGATGGACAATGCCTTCAACTGGATA  
GTAAATTCAAACGGTGGAAACGTATTCACGGAGGCGAGCT  
ATCCCTATGTTTCTGGGAATGGTGAGCAGCCACAGTGCCA  
GATGAATGGTCACGAGATCGGTGCTGCGATAACAGACCAT  
GTTGACTTACCGCAGGATGAGGACGCTATCGCCGCGTATT  
TGGCAGAAAACGGTCCCCTTGCTATTGCCGTTGACGCCAC  
AAGTTTTATGGACTATAACGGTGGGATTCTGACTTCATGC  
ACCTCCGAGCAATTGGATCATGGTGTGCTCCTCGTTGGTT  
ACAATGATAGTAGCAATCCACCCTACTGGATCATCAAAA  
CTCGTGGAGCAACATGTGGGGCGAGGACGGCTACATCCGC  
ATCGAGAAGGGCACAAACCAATGTCTCATGAATCAGGCCG  
TATCCTCCGCAGTTGTTGGAGGCCCACTCCACCACCACC



ACCACCACCGCCGCCTTCAGCAACTTTTACACAGGACTTC  
TGCGAGGGCAAGGGTTGTACCAAAGGCTGTTACATGCCA  
CCTTCCCCACTGGCGAGTGCGTCCAGACTACCGGCGTCGG  
CTCAGTGATCGCCACGTGTGGCGCAAGCAACCTTACACAA  
ATAATCTACCCACTAAGCAGGAGCTGCAGCGGCCTCTCTG  
TGCCGATTACTGTGCCACTGGATAAGTGCATACCCATTTT  
GATTGGGTCCGTTGAGTATCATTGCTCCACCAACCCACCC  
ACTAAGGCGGCCAGGCTGGTCCCACACCAG

AJ308037.1 1-1422 *Trypanosoma brucei brucei* gene for amino acid transporter AATP11. Coding

ATGACATTTGAAGCTGCTGCACAAGCGCCAAACAAGTGCC  
CTACCAATGAGGCAACAGCGGAACCATTACGCACTCCAAA  
TGTTCTCGCAGACAACCTCCTCGCTCGTTCCAACCTTGAGT  
GAAGGGGAATCACCGGAGAAATCTGGAGAAGCACAAAAGC  
CCGAAGAACAAGGCAACGCGTTGATGCGCTGTTTCCACTT  
TATCTTACCGCGCGGTGGTGCCCTTTCCGGCATCTTCAAC  
CTGGCAAGTGTTACATTGGGCGCCGGTATCATGTCAATTC  
CATCCGCTTTCAACACATCAGGCATGATCATGGCAATCAT  
CTATTTGCTGCTGGTTACGGTTTTTTACCGTCTTCTCCATC  
TTCCTGATTGTGTCTGCGGCGGAAAAGACCGGCTACCGCA  
GCTTTGAATCCATGGCGCGTAACCTACTCGGTCCCCGTGC  
TGATATTGCTGTGGGTTTTCTGTTGTGGCTTCTGTGCTTT  
GGCGGTGCCTCTGGATATGTGGTGGCAATCGGTGACGTAC  
TGCAAGGATTGCTTTCACATGAAAAGGTACCGGCATATCT  
GCAGTCCAAAGGCGGCCGCCGCTGCTCACGAGTGCCATC  
TGGTTTTGTCTTCATCTTTCCGTTGACGCTCCCTAAGAGGG  
TGAATTCATTGCGCTATGCGTCAGCGATCGGCGTTTTCGTT  
CATCCTATTCTTCGCCATCTGTGTGGTGGAGCACTCGGCT  
GAAAAGATGGTTACCGATGGCGGCATCAAGCAGGAACTTG  
TCATGTTCCGTTCCGGTAATGACGCCGTGGCAGGGCTTTC  
GCTATTCATCTTCGCTTATCTTTGTCATGTGAACTCATTC  
TCCATCTTCTTTGAGATGAAGAAGCGTTCGGTCACTCGTA  
TGACCCGCGATGCGGCGGTGAGCTGCTCCATTTGCTGCTG  
TGCTACCTGCTCACCGGATTTTTTCGGCTACGCAGAATTC  
GGCCCAACGGTGGAGGGCTCCGTTCTGAAGCTTTACGACC  
CCTACGCAAATCCCGTCTTCTTTGTTTGCTTCATTGGCAT  
CATCGTCAAACCTCTGCGCTGGGTTTTTCGCTTAACATGCTC  
GCATGCCGTACAGCCCTCTTTTCAGGTGCTGCGGTGGGACC

TGGATACCATGTCATATGTTAGGCACAGTATCGTCAGTGT  
TTCATTTGCTGTCGGTTCGCTCGTTCTCGGTTTGTTCGTG  
CCAGACATCAACGTCATCTTCGGACTTGTTGGTGCCTTCT  
GCGGTGGTTTCATTGGCTTTATATTCCCCGCACTCTTCAT  
CATGTACGCCGGTGGTTGGACACGCCAAAGCGTGGGCTGG  
GTGCAGTATATCTTGACATATGTATTGCTCATTCTGGGCG  
TTGTTGCAATTGTCTTTGGTACGAGCGCGTCTGTTTACTA  
CACAATTAAGAGGTATTCTTAA

AY009111.1 1-1251 MP48 Coding

ATGTTGCGTCGCCTCGGTGTACGTCACTTCCGGCGAACGC  
CGCTCCTTTTTGTTCGGTGGGGACGGCAGCATTTTTGAGCG  
CTACACAGAAATCGACAACCTCCAACGAGCGGCGGATTAAT  
GCGCTGAAGGGATGCGGTATGTTTGAGGATGAGTGGATTG  
CCACTGAGAAGGTTTCATGGAGCGAACTTCGGTATCTACTC  
CATTGAAGGTGAGAAAATGATCAGATACGCAAAGCGCAGT  
GGCATTATGCCTCCGAACGAGCACTTCTTTGGCTATCATA  
TATTGATCCCCGAGTTGCAGCGATACGTAACCTTCTATTCG  
TGAGATGTTGTGCGAGAAGCAGAAGAAGAAGCTACACGTT  
GTGCTCATTAAATGGAGAGTTGTTTGGAGGAAAATATGACC  
ACCCTAGCGTTCCAAAGACACGGAAAACGGTCATGGTGGC  
TGGTAAGCCGCGAACAATAAGCGCCGTGCAGACCGACTCT  
TTTCCCCAATATAGCCCAGATCTCCACTTTTACGCATTCG  
ACATAAAGTACAAGGAGACAGAGGGTGGAGACTACACTAC  
TCTCGTCTATGATGAAGCCATAGAGCTGTTTCAGCGCGTT  
CCCGGGCTCCTGTACGCGAGGGCGGTCATTCGAGGGCCAA  
TGTCAAAGGTTGCTGCATTTGATGTGGAACGCTTTGTAC  
AACCATCCCCCTCTTGTTGGTATGGGCAACTACCCACTG  
ACGGGCAACTGGGCTGAGGGGCTTGTCGTGAAGCACTCGA  
GGCTGGGAATGGCGGGATTTCGACCCCAAAGGTCCAACGGT  
GTTGAAGTTTAAATGCACAGCGTTTCAGGAGATATCCACA  
GACCGAGCACAAGGGCCTCGCGTAGATGAAATGAGGAACG  
TACGAAGAGACTCCATCAATCGCGCCGGTGTGCAATTGCC  
AGACTTAGAGAGTATTGTGCAAGATCCAATTCAACTCGAA  
GCTTCGAAACTACTCCTTAATCATGTGTGCGAGAATCGTC  
TCAAAAATGTGCTATCAAAGATCGGCACGGAGCCCTTCGA  
GAAGGAGGAAATGACACCAGACCAGTTGGCCACACTTCTT  
GCCAAAGATGCCCTGAAAGACTTTCTAAAAGATACCGAAC  
CCTCCATTGTAAATATACCGGTACTCATCCGCAAGGATCT

GACTAGGTACGTTATATTTGAGTCCAGGCGGCTAGTCTGC  
TCACAGTGAAGGACATTCTGAAGCGTCAGTCTCCTGACT  
TTAGCGAATGA

AY029070.1 789-3719 Trypanosoma brucei 3' terminal uridylyl transferase  
(3' TUTase) Coding

ATGGTAAGTAAGTACCACCGCTTGCTTCAGCAGGGGCTAC  
GTGAGGAAGAAGAAGGAGTCACTGAACGAAATATGGTGGC  
AGGCGGTGAACAGCGGCACGGGCACGTGGATGACGACAAT  
GCGGAAGGGGATGCTGATTTTTATGACCAGAAAGATGAAC  
GGCGAGCGAAAATGTGGAATCCTAAACATGAGTCTGCGAA  
TGTTTCCGCGGGCGGGAAGCAAAATAGGTTCGGTGAGGGAT  
TGCCTCCCCGGTTCCTTCCCTCCCGTAGCCAATACGAGCA  
CTGACGCGGCGGTTCAGGTTTGATAGGGAACGAAAAAATGC  
GGGTCACGGGGTTGATATTTCTGTGTGTCGAAGGCGACGGT  
GCGCAAATGGGTACGTACGTCTCCACCGGCCGTAGTGACG  
CAAAGCAGGGGGAGGAAGTAGCGCTATAGGCGTCACTGC  
CGATGATGAGAGTGATGGGAATTTGGACACGGACGGTAGC  
GACGCTTCTGAGGGCGATGAGGTTGAGTCGACAACCGACG  
CTGATGTGTATGGGGAGGACGATAACCACTGAAGGGCCTCG  
TGGTGGTGTGCGGTTGTATTCTTGCGATGCCTGTCCGCAT  
GCTGTGTTCACTCATGCAGCGTTGCTTGCCCACGCTG  
AGGAGCACCATGCGGATCTATTACCAGATCATGCCCGTTT  
GCGTCGTATCGCACAAAACTTAATCCAGTGTGGAACCGC  
GCTCTAAATGCCCGTCGTAACACCATTACATCGTGGGGGA  
AGAAAATATTCCACGTGGCCGCGCAACGTGATGCGGGGGA  
GTCGAAGATGCAGGAGGCTCATCGTGCCCGGGCACAACCTG  
GAATGTGTTGTGCGCCGCTGGCATGATAAAGCACGTGTCT  
TTATATTTGGAAGCTCTGTGGCGATGGGCGTGTGGGACGG  
CACAGCAGATATTGATTTTTGCCGTCGTTGATGTTGATGCA  
ATGGAGCGTGGAAGTTGGCCACCGTTGGAGAAGAACGCTG  
TGCGTTCCATCACAGAGCTACTACGCCGGGTGGGGTTTTTC  
ATTTGTAAATTTGGAGCCAATTAGCCACGCTAGAGTGCCA  
ATTATTAAACATCATGCTTCGTCACCAATCCTTACCGTCG  
CAAGAAGAGACGCAGAAGACGTTGTAGCTCGAAGCATTCTG  
CTTTATTTTGAATGGCCCTGCCACGCGCGAGGATCGGTTG  
CTACTGGAAGGGAGCGTACGCGACGCTGTGGGCCCCACTG  
GGGTGCAACAGGTGTGGTGGAAACCGCACCTCCGACATGAT  
GTCAGCCACACTCGAAAGTACTACCGCTGCCGTTAGGGCA

GCAATGTGCAGCCCGGCACTTGCCTCGGGCGTCACTGCGCA  
CAAAGGTACAGCCGGCGCATGATGAATGCAGGCCAGAGTT  
GTATAATATTGACTTCGATCTCAGCTTCCGCGCATTTGGC  
ATACGCAATTCAACTCTTCTACGGAAATACTTACTTAGTC  
ACCCGTGCGCTCGACCAGGAGCCATTGTACTTAAAGATTG  
GAGCAAGACAAGTGGTGTGAATAACTCCGTTAACGGTTAC  
TTTACTAGTTATGCAATCAACATAATGTGGATATATTACC  
TTGTTTCAGAAGGGTTATGTGCCGTACGTGGATCCTCTTGA  
AATTCCTGAATCACTCGTAAATTATACCGATTTTGACCCC  
AGGTACACCCCGATGATAGACCCAGAGATTACGAACACAG  
AGCGGGAGGAGCTGTACAAAGCAGCCGGCGACATGCTTGT  
GGGGTTCTTCTATTTTTTACTCATTTGAATTCGACTGGGGG  
CATAACGTAATTTCCCTTAACCGGCCGGGAATAACAACGA  
AGAGGATGCTAGGGTGGCACGTTGAGGACGTTGTACCGGT  
TGCTTCCACCTCAGTGAGCAGTGGTGGTGGAGGTAGCAAT  
GTGAAGCGACACCCTACAAGGTACGAGCTTTGTATCGAGG  
ATCCCTATGAAGAAAACCTTAAATTTGGGCCGACACATCGG  
AGTAACGAAGTCGTTGCGTGTGCGGACGGAACCTTACCGC  
GGTCTCTTATCCTTATTGAAAGAGGGGGAGACAAGGTCGT  
GCGTCTTCGCCGACGAGATTCATCAGGCACGCCGGCGGC  
TGGGGGTAAGCAGTCGGCCGCTCTACCAGCTCGAGCACTG  
TTCAAACCTGATGGCCTTAACAACCTCAGGCTATATCAGAAT  
CAAGGCGTCTCCACAAAGTAATAGTGACAATAGCGGTCCG  
CATTGCTAACGGTGATAATGAATCCCTTACGGAGGTCGGC  
GGCGGCCACAGGGTTGAAGGCGCTGGTGTGATCCAGCTT  
CCTGCGCAGGGGCGTTCGCTTTCCCTCCTTCGGTGAGCCACC  
GATTGGAGTTCATGAGAAAACGCTTGAAAGCATATTTGTT  
GAGAAGGCCCTATGGAGTTTCAGTTGGTACGAAAGGTAT  
GGAACCTGGCACCAACTGATCCATCGGCTCGGGTACAAAAT  
ACACCGAGGTCACGTGATGCCACGGCGTGAAGTTGGGGTA  
CGTTGCACCGCCCGGCGCGATGCGGAAGAAACAACAACAG  
AACTGGCTTCGGGCGTTGACACAACCTAAGAGCCTGAGACC  
TGGGCGAGGTCTTACAGACACCATGCTGCGAGACCTGAGC  
CGCGGCTACATGACGCTCACACCGGAATGGGTTGCTTGGT  
CAGCGCCATGGGTAAGCCAACACTTGCGCGGATACAGCCG  
CTAACGACAGTGCCTCCGCAGTGGCCGATGAAACCCCA  
CCCGCCCTGGCGACGGTTCCGTCTGTCTGTAACACCGA  
CTGGAGAGGCGGTTATGGGTGCGATGAGGACCACCCGCG

AAATGCTGCACCTGCTCGTAGGGTGGAGCTGCTGAAGTTA  
TGGCTTTGGCGCGGCATCAGCAAGGTTACTCCATTCAAGA  
GCCCTCGTTGA

AY034830.1 718-2436 PUF1 Coding

ATGTCGTCCGGATGAGGAAACCATCACAACCTCTTTACTTAC  
GGCGCCAGAACATCTTAAAGCAGTTGAGCGAGGTTAACAA  
CGAGATAAGAACTGCTGAACAACAAATAAACGAGAAGTCA  
AATAACAATGAAACTAGGAGGGTCCGAGGAACTGGTAGTAA  
AATTCGGTGGAGATGATGACCGGGAGAGTTACCTGTTGGA  
TTTTTGCATGCGGGATGCCAACGGTTTGCGGGAAGCGATC  
CGGTACGTCGATGCATTGAAAGCGCTGAAGGAGTGCACAA  
GTGATGACGAAGTCAATAGGAAAAAACACCTGTCTCGCAA  
CACGTTTCGTACACGCGATGATTGCCAGGTCGGGTGAGCTG  
ATGGTCGATGCCAACGGGAGTGAGTTGATCCAACATGCC  
TCGGGATGTTGAAGAGTGGAGGCAAAGTCGCCCCTGTACT  
GTA CTCCACAGACTACATAGCGGCTTCAGAAAGCGATCTT  
TCTGAGTTTCTTTTGCTTCTTGAGGTACTGAAGGACAAAA  
TACCTCAGATCTGCTGTGATACCAATGGAAGTAGGGCGAT  
GCAAAGGTTTTTGGACTCCTTGAAAAGTTTGGAGGAGGTC  
GAGTTCAGCGCACAGTGCTTCTCGGAGTGTATTATCGAAC  
TTTGCAAAGACATTGACGGTAACCACGCGGTTTCGCGACT  
GCTGGCGGGCGGCTCGAGGCACCCCGCTGTGGGAAAGTGGT  
GCGGCGGGTGACGATTCTTCGTCAAAGCTGGCGCATATAC  
ACCAGCTGCTCTACGGCAAATTCCCTGAAAGCTGCGTGGA  
TGTGTGCGGGAACCGACACGGATGTTGCGTCATTCAGAAA  
TGCCTTCAGTGGGCGCCAGAGCCATACTTCTCAACATTGA  
TGGACACAATCGTCCACGATACCATCAAGCTCGTTCACGA  
TCCGTTTGGAAACTATGTGATTCAATTCATTTTGGATCAT  
GAGCAGGAGCTCTCGCAGCGGTCAAGTACAGGCAGCGAGG  
GGGCTGATTACACAAACCGGATAATAAGGCAAATGCTCCA  
CAACGTGGCGGCACTTTCATGCAATAAGTTTTTGCAGCAAC  
GTTATTGAAAAGTGCCTGAAGAGTGCGACACCAGATGTGC  
GGCAGCTTCTTGTGGATGAACTGACTGATCCGCAGATCCT  
GCCGAAGCTCTTGACGGATAGTTTTTGCAAACTACGTTATC  
CAAACAGCGATAGTGACTTCTACCGAGGAGAAGCAGTTCA  
CTCAGCTGCGGGACTCCATTATGCCACTGCAAAGGATGCT  
TAAGAACTCTCCCATGGTGTGAAGGTGGAATCAA AACTG  
GTGCGCCAGCAGCGTGAGCTGGCTCGAAAGAACGGCAATC

AAAAGAATAAGAAACGATGGGCCCAACCTGCACCGCAAGT  
AATGGAGAAGGGAATGCATGAGGGTTTCATTGGTACTCAC  
ATACTCCCCGGTATGGCTGGTATTCCAACGATTGTGGGAA  
CGGATGAGTTTGGTGGACCTGCCTTGTCGCTTCCGGGTGT  
AGCAAAAGAAGCGGTTCCCATCATGACTCCCCTCAATAC  
ATGCCTTTAATGCTTCCGGGACAGCAGACACTCATTGGTC  
TGCCGCAGGGTTATCCACAACAGCAGTTTCCAATGGATAT  
TATGAAAGGAGGTAACATATGGGACCCACAGCAAGGTTTT  
ACGTTACTGCATCATCCGGAAAGCAAGAAAGGAACATAG

AY046919.1 552-1178 Trypanosoma brucei cell cycle associated protein  
Mob1-1 gene, Coding

ATGGAAAAGCATAAGGAAGGAAGGAACTGAACGTTACAACCTCC  
ACAAGTTTGCCAAATCACTTGTGCGCTCAGGTGACCTCAG  
TGCTGCTGTAAAGCTACCGCAAGGCACAGATCTGAATCAT  
TGGCTTTCCGTACACACTGTAGATTTCTACAACATCACTA  
ATGTTTTGTACGGCTCTCTAACAGAGTTTTTGCACGAACAG  
CAGTTGTCTGTGTCATGTGCGTCAGGTCCACGCTATGAGTAT  
TTATGGCGTGACCCGCCGGAATATCCAAAAGCAACGAAGG  
TGAGCGCACCGGAGTATGTGAGATTGTTGATGGAGTGGAT  
CGAACGGCAGATCAATGATGAACGTGTGTTTTCCGTCTGAG  
GATCGTAATCCCTATCCACCAGATTTTCGCGGATAGGGTGA  
AGGCGTGCTTCAAGCGACTGTTCCGCGTTTTATGCACACGT  
TTACTATTTCCACTTTGCGAAGATTCGTGAGTTGCAGGAG  
GAATCTCACATCAACACCGCACTGAAACATTTTTATGTATT  
TTGTGTGGGAGTTTGATCTGATTCCTCGTGAGGAGGTGTC  
TCCGCTGCGTGAATTGCTGGTAAACTTAATGGGTCAGCGC  
GCGAAGGAAAAGTTGGAGGTTCCGTAA

AY046920.1 320-997 Trypanosoma brucei cell cycle associated protein  
Mob1-2 gene, Coding

ATGAAGCGTTTTAAGGCAAAGCTCTTCGACTCCGACAGAA  
CATACAAACCTAAGAAAAAGCATAAGGAAGGAACTGAACG  
TTACAACCTCCACAAGTTTGCCAAATCACTTGTGCGCTCA  
GGTGACCTCAGTGCTGCTGTAAAGCTACCGCAAGGTGCCG  
ATCTGAATCATTGGCTTTCCGTACACACTGTAGATTTCTA  
CAACATCACTAATGTTTTGTACGGCTCTCTAACAGAGTTT  
TGCACGAACAGCAGTTGTCTGTGTCATGTGCGTCAGGTCCAC  
GCTATGAGTATTTATGGCGTGACCCGCCGGAATATCCAAA  
AGCAACGAAGGTGAGCGCACCGGAGTATGTGAGATTGTTG

ATGGAGTGGATCGAACGGCAGATCAATGATGAACGTGTGT  
TTCCGTCTGAGGATCGTAATCCCTATCCACCAGATTTTCGC  
GGATAGGGTGAAGGCGTGTTC AAGCGACTGTTCCGCGTT  
TATGCACACGTTTACTATTCCC ACTTTGCGAAGATTCGTG  
AGTTGCAGGAGGAATCTCACATCAACACCGCACTGAAACA  
TTTTATGTATTTTGTGTGGGAGTTTGATCTGATTCCTCGT  
GAGGAGGTGTCTCCGCTGCGTGAATTGCTGGTAAACTTAA  
TGGGTCAGCGCGCGAAGGAAAAGTTGGAGGTTCCGTAA  
AY049059.1 1-309 Trypanosoma brucei rhodesiense ZFP1 mRNA, complete  
cds. Coding

ATGCACATTTCAACACCCACTCTTTCCGACGTGCGGTCAG  
AAAACAGCCTCAGCTTCAGTGGCTCACGTAATGGACGCAG  
GGGTGTTGACGCCAGCAAATTCGCGACGCAACCGTGCCGT  
AATTATCGGTTCCGGTGCGCATTGCTCGTTTGGGTCCCGTT  
GCGCCTTTTCACATGGTGAGAAACCCGACCTTCCGCCACC  
ACCTCCATACAGCGCTGCTGTGCAAATGAAATGGTTCTC  
CCACCCGCTTATGCCTCACGCTTCCGCCATGATCCGTACA  
GTTTTTACAGCGTAAGGTTGGAGGATTGA

J02865.1 528-2021 T.brucei disulfide isomerase-like protein of unknown  
function (BS2) disulphide isomerase-like protein Coding

ATGCGCGCTATTTTTCTTGTTGCTCTTGCGCTCGCCACCA  
TGCGCGAGTCGACTGCGGAATCCCTGAAGCTCACCAAAGA  
GAACTTCAACGAGACCATCGCAAAGAGTGAAATATTTCTC  
GTGAAGTTTTATGTTGACACCTGTGGATACTGCCAGATGC  
TCGCACCAGAGTGGGAGAAGGCGGCCAATGAAACTATTGA  
CAATGC ACTTATGGGCGAAGTCGACTGTCACTCACAACCT  
GAATTGGCGGCTAACTTTTCCATCAGGGGATACCCAACAA  
TCATTCTCTTTTCGTAATGGCAAGGAGGCGGAGCACTACGG  
TGGTGCCCCGCACGAAGGACGATATTATCAAGTACATTAAA  
GCGAACGTTGGACCGGCAGTGACGCCAGCGTCCAATGCTG  
AAGAGGTGACAAGGGCAAAGGAGGAGCATGATGTAGTGTG  
CGTTGGCCTGACAGCCAACAATAGCACTTCACTTTTCTACC  
ACACTGGCCGAGGCCGCGCAGTCGTTTCAGAGTCAGCCTCA  
AATTCTTTGAAGCAGAACCTAAGCTTTTCCCCGACGAGAA  
GCCCCGAGACCATTGTGGTGTACAGGAAGGGAGGCGAAAAG  
GAGGTTTACGATGGCCCCATGGAAGTAGAGAAGTTGACAG  
AATTCCTTCAAATTTCTCGCGTTGCCTTTGGGGGTGAAAT  
TACCCCGGAGAACTATCAATACTACTCAGTTATAAAAACGG

CCCGTAGGATGGGCTATGGTCAAGCCTAATGAAACTGCCT  
CGATCGAGTTGAAAGAAAGCCTCACAGAAGTGGGTAAAAA  
AATGCGATCCCATATGGTAGTTCTCTGGGTAAACATTTTCG  
AAACATCCGTTTTGGAGGGACTTCGGTGTCCCGGAGGACG  
CCAAGTACCCCGCCTTTTTGGCTATCCACTGGGGCGCCAA  
TACTTGCAATCCACAGCGGAGGTTGTGACCCGCGAGTCC  
CTTGAGAAGTTCATCCTGGAGTTTGCTGCAGGTTCGTGTCG  
AGCCACCATCAAGTCCCTCCCTGTCCCCGAGGTGGAGAC  
TGTTGATGGCAAACCACCATCGTGGCAAAAACAATGCAG  
AAGCACCTTACGTTCGGAAAAGACATGCTCATCCTTTTCT  
TTGCCCTTGGTGCGGTCACTGCAAGAATTTTCGCTCCAAC  
CTTTGATAAGATCGCGAAGGAGTTCGATGCAACCGACCTT  
ATCGTTGCCGAGCTTGATGCCACAGCCAATTACGTAACT  
CGTCTACTTTTACAGTTACAGCATTTCGACGGTGTTCCTT  
CGTCCCGAATGGAGGGAAACCCGTTGTTTTCGAAGGTGAA  
CGCTCATTTGAAAACGTCTACGAATTTGTTTCGCAAACATG  
TGACAACGTTTAAGGTGAGTGAGAAACCAGCTAATGTGAC  
AGAGGAGAAGAAAAGCGAGGAAGAGAACAAGAGCAGTAAG  
AGCAATGAAAGTAATGATAGCAATGAGAGCAATGTTGATA  
AACAAGATCTGTAG

J03157.1 777-6074 *T.brucei* RNA polymerase IIA largest subunit  
(rpII197A) gene, RNA polymerase IIA largest subunit Coding  
ATGTCAGGTGGTGC GGCTCTACCGGTTTCCCAGATGGAGT  
TGCACAAGGTGAATGAAGTGCAGTTCGAGATATTTAAGGA  
AAGGCAAATCAAAAGTTACGCCGTGTGCCTTGTTCGAGCAC  
GCCAAGTTCGTATGAACGCGGCCGACCAGTCCGGGGAGGCA  
TCAATGATTTGCGTATGGGTACCACTGACTTCGAATTCGC  
ATGCGAGACATGTCATAGGAAGCACCCAGAGTGCCCTGGA  
CACTTCGGATAACATCGAGCTCGCAGAGCCTGTCTTTAATA  
TTGGCGTCTTCGATCTTGTACTGCTGGTGTGTTGAAGTGTGT  
TTGCAAAACGTGCGGGGCTCTCCTCCTTAACACGCGCGAA  
CAGGACGTACATAAGAAGTTGCAGCACATGACAGGCCTCA  
ACCGTCTTCGGCAAGTTGCGAAGATGGCTGAGGCAAAGTG  
CCGCGTCTCCACCAGCACCGAAGACGATATGGGGATTGAC  
GGCTTTGATAGTGCCCTTTCAATGGCGGATCAGGAATGG  
GGCCAGGCGCGACACGGGGTTGTGGTGCCTCAACCCCG  
CGTAAGTCGCTTTTATGGTATCTACCCAACACTCGTTATC  
AAGGCAGTACATGAGGAACAAGACGCCGAGTGGCACGCTG



ATAAGGTGCGACAGGTGCTTGACCGCGTGTCCGATGATGA  
TGCTCGCTTGATGGGCTTCGACCCTCAACGTTGCCACCCA  
CGGGATCTTGTGCTCACTGTGCTTCCAGTTCACCCCCGC  
AGGTGCGGCCCCGCAATATCCTTCGGCGGTCTCAGGTCAGA  
TGATGAACTCACGCATCAGATCATGTCCATTGTGAAACGC  
AACAACTACTACGCAGGGATAAGGAGTCAGACGTGCAGG  
CAGCAATTGACCGGAGCCGGGCGTTATTGCAAGAACATGT  
GGCGACATATTTCAATAACGCTTCCACATACTATAAGCCA  
ACGAAGGTGAATGACACAAAGAAGCTAAAGTCATTAACGG  
AGCGCTTGAAGGGGAAGTACGGTAGACTGCGTGGAAATCT  
AATGGGGAAGCGGGTGGACTTCTCCGCTCGAACCGTCATC  
ACAGGCGATCCGAACATTGACGTGGATGAAGTAGGTGTAC  
CCTTTTCTGTGCGGATGACGCTTACATTCCCCGAGCGAGT  
GAACACAGTAAATAAGAAGCGACTGACAGAGTTTGCCCGG  
CGCACGGTCTACCCGTCGGCGAATTACATACACCATCCGA  
ATGGCACCATAACAAAACCTCGCGCTCTTGCGTGACCGCTC  
CAAGGTGACGCTAAACATCGGTGACGTTGTGGAGAGGCAT  
GTGATTAATGGGGATGTCGTCCTGTTCAACCGGCAGCCGA  
CATTGCATCGCATGAGTATGATGGGCCACAGGGTTTCGGGT  
TCTCAACTATAACACTTTCCGGCTTAATCTCTCTTGTACC  
ACACCATACAATGCTGACTTCGATGGTGACGAAATGAATT  
TGCACGTGCCGCAGAGTCTCTTAACGAAAGCAGAGCTGAT  
TGAAATGATGATGGTTCCAAAGAACTTCGTCTCGCCCAAT  
AAGTCTGCTCCGTGCATGGGTATTGTGCAAGACAGTCTGC  
TGGGTAGTTACCGGTTGACGGACAAGGACACATTCCTCGA  
TAAGTACTTTGTGCAAAGCGTGGCACTTTGGCTGGATCTT  
TGGCAGTTACCCATTCCCGCCATTCTGAAACCCCGACCCC  
TCTGGACCGGAAAGCAGGTATTTTCACTTATCCTTCCTGA  
GGTTAACCATCCAGCAACACCACAGGACCGGCCCCCCCTTT  
CCTCACAATGATTCCGTAGTGATGATACGACGTGGTCAGT  
TGTTATGTGGACCAATCACTAAGAGTATCGTTGGTGCTGC  
ACCGGGATCACTCATTACGTTATATTTAATGAGCACGGA  
TCTGATGAAGTGGCACGCTTCATCAACGGCGTGCAGCGCG  
TGACGACGTTTTTCTTACTTAACTTCGGTTTCAGCGTTGG  
GGTTCAAGACACCGTAGCTGACAGTGACACCTTGCGGCAG  
ATGAATGATGTCCTCGTGAAAACACGGAGGAATGTTGAAA  
AAATTGGTGC GGCTGCCAACAACCGTACACTGAACCGCAA  
GGCTGGTATGACACTTCTGCAGTCATTCGAAGCAGATGTC

AACAGCGCACTGAACAAGTGCCGCGAAGAGGCAGCAAAGA  
AGGCACTGAGCAACGTCCGTCGCACTAACAGCTTCAAGGT  
GATGATTGAAGCAGGCAGTAAGGGTACAGATCTGAACATA  
TGTCAAATTGCCGTCTTTGTTGGGCAACAAAACGTCGCGG  
GAAGCCGTATTCCATTCGGTTTTTCGTAGGCGCACGCTTCC  
ACACTTTATGCTTGACGATTATGGTGAGACGTCACGCGGC  
ATGGCAAACCGTGGTTACGTTGAGGGTCTGAAACCGCACG  
AGTTTTTTTTTCCACACAATGGCTGGTCGTGAGGGTTTGAT  
CGATACTGCGGTGAAAACCTCTGATACAGGGTACCTGCAG  
CGTAAGCTTATCAAGGCGCTAGAAGATGTCCACGCAGCCT  
ACGACGGTACTGTACGAAATGCAAACGATGAACTAATTCA  
GTTTATGTACGGCGAAGACGGTCTTGACGGGGCCCGTATA  
GAGGGTGGGCAGCTGTTCCCTCTTCCCTTTCGGGACGATA  
AGGAGATGGAAGACACGTACAAATATGAGTACGACGTGGA  
TGGCACCTTCAGTGGGAAGGTTGGTGGTAACTATATGGAT  
CCCCACGTTAGGAAGATGCTACGCGCTGATCCCCAAAATG  
TTCGGAAACTTCAGGAAGAATATGAACAGCTTACGGCGGA  
CCGCGAGTGGTCACGCAAATGCTTGACCTCGAGGATCGT  
GATAA ACTGAAGCTTAACCTCCCTGTTAATCCAGGTCGAC  
TTATCCAAAACGCGCGCAGTACTATGGGCAAACGTAGTCA  
AGTGTCCAACCTGAGCCCCATCACTATTATCGACCACGTG  
CGGAAGCTTCAAGAAGATCTCATGAAACTCTTTCCATCTT  
ACCACCGGGGAGGGGATGGATACATCAGGAATACGTTGAG  
TCGTGAACGCATTGAAAGTGCGCTTACTCTCTTCAACGTT  
CATTTGAGGCAGCTACTTGCGTCAAAAAGGGTGCTGAAGG  
AATATAA ACTTAACGATAGGGCTTTTGAGTATCTTCTCAA  
GGAAATTAGAACCAAGTACCACCAGTCACTCACCACACCG  
GGTGAGAACATTGGGGCAATCGCTGCGCAGTCGTGTGGTG  
AACCTGCCACACAAATGACACTTAACACGTTCCACAATGC  
GGGAATTTCCCTCAAAGAACGTTACCCTCGGTGTGCCACGT  
TACTGGAGCTTCTAAACGTCTCACGAAACCAAAAAGCACG  
CGAGCATGACAGTGTCTCTGTTTCCACCATATGATGAAAA  
GCGAAATGCGCAAAAAGGCCAGCATCTCATTGAATACTGC  
ACGCTGGAGAGTATCACAAGGCGCATAACAGTTCATCTACG  
ACCCTGACCACGTCACACCGTTGTGGAGGCTGATCGTGA  
CATCCTAGA ACTAGAGTGGAATGTTATGGATGAAAGCGAT  
GCAGAGCTAAGAATACAGGAGGTAGTGGCAGGTTTCGCCAT  
GGGTGGTGAGGTTGGAGCTCGACGTGGATATGGTCCCGA

CAAGGCCCTCGATATGAAGGATGTGAAGCAAGCTATCCTG  
CGAGTGGATGAAAGCTACATAATTGAAACGGGAATGGCTA  
ACAATGTGCGCCAGCGGACCATAAGAATGCGGTCCAGATA  
TAACGAAGGAGCTGACTCGATCCCAAAGCTTAAGCGTGAA  
ATCCCAGCCCTTCTTGCGCGGGTTCCTTGCGTGGTATTC  
CCGGTGTGCGTCCGGGCGCTGCTGAAGGACACCACCGAATT  
CACTGTAGATCAGGCAACGGGGAAAATGAGTGGCAACAAA  
ATATGGGCAATAGACACGGACGGCACGGCATTGCGACGTG  
CTTTTATTGGTGTTCGTAGGTGAGGATGGTAAGAACATTAT  
TAATGCGGTGAAAACGAGTAGCAACAAAGTGCCTGAGGTA  
TGTAGTCTTCTTGGTATTGAGGCGGCGAGATCAAAGATGT  
TGACGGAACTTCGTGAGGCTTACCTGGCCTATGGTCTCAA  
TATTAACTACCGCCACTATACTATACTGGTGGATACGATA  
TGTCAGCATGGGTACCTGATGGCTGTTTCTCGCTCAGGAA  
TCAACCGCTCCGATACGTCCGGTCCGTTGATGCGCTGTTT  
ATTTGAAGAACTGTTAAGGTGCTTATGGCGGCTGCATCT  
TTTGGCGAGTGCGATCCCGTGCCTGGGGTATCAGCAAATC  
TTGTGCTCGGTAACCAAGCGCGCTTGGTACGGGGCTTTT  
CGATCTTGTTCTCAACATGGCAGCGCTGCAGCAGGCTGTA  
CCGCAGGCAGAAGCGGTTGCACCCGAAAGGATGTAAATG  
TGTATCACAGTCTCGGGTCCACGCTGCAGCAAATATCCA  
ATCCTCCATTGCGTACCGACCAAGAGATCATGATGCAACA  
CCGTTTGTAAACAATGCCAGTCTGTTTCTCCGCCAGGGTT  
TCGGTGGGGGCTCCTCCTCCGCACCAGTAACGGCCTCGGC  
CCCATAACAACCTTCGACGACGTACCACGGCGGTCGGCTC  
GAAGCGAGCGCAGTGCACAGGAGTCAAGCTTATTCTACAT  
CCCCCGCTTTGGAATACGGAGGGCGGGAAGCAAGCGCCTC  
ACAAATGTACAGCGTTATGTCTTCCGCCAGCGCGTTCAAC  
CCAGTTTCAACGCGGATGTCGTCAGTGGCGCACAGTTATT  
CCGAATACAGTGAAGCCTCTTCTTACCACCTGCAACACAG  
CGTGGCGCCAACCTCCATGCAAGCTTCACTACCAAGAACC  
GACAACTCTATGACCATGCAAGGTATCGGTAGTGTTCAG  
TACCGTACACGCCCCATGCCATGTCCAGTGCTGCCCCACC  
GTCGCAGGTATACGCCAGCACAGAAGTCGGCCGGTCCGCAC  
AGCGAGGACTCGCGGTCCCAGTCAGCTCTCTACGTTCCGA  
CACTCTCACCCACCCACGCGGGTTACGCTATACGAGGTGA  
TGAGCCATCCACACATCGTAGTGAATGTCATGTGG  
CGGGAGGCTGGCGGGGGAAGGGAACAGGATGAGGAAGATG

ACCTCTCCACGAATTATATGCCCACTGCAAAGACACCCCA  
GCAGGCGGCACCGCCGACAGCCGCAGAGTTTGGGGACGAA  
GAAGAGGAAGAACAGTAA

J04124.1 240-1316 T.brucei glycosyl-phosphatidylinositol-specific  
phospholipase C Coding

ATGTTTGGTGGTGTAAAGTGGTCACCGCAGTCATGGATGA  
GTGACACGCGGTCTTCCATTGAGAAGAAATGTATTGGTCA  
AGTATATATGGTAGGAGCACATAATGCAGGAACACACGGC  
ATACAAATGTTTTCCCGTTTGGATTAGATGCCCTGAAA  
AGTTACGGAGCCTCCCTCCATATGTGACCTTTCTTTAAG  
ATTTCTTACTGTTGGTGTGAGCAGCAGATGGGGACGTTGT  
CAAATCTTTCTATTCGACAGCTTTTGGATCATGGGGTGC  
GTTATCTCGACTTACGCATGAACGTAAGTCCGGATCAGGA  
AAATAAAATTTACACAACCTCATTTCATATTTCTGTTCCA  
CTACAAGAGGTTCTGAAGGATGTCAAGGATTTCTTGACCA  
CACCTGCAAGCGCCAACGAATTTGTCATTCTCGATTTCTT  
GCATTTCTACGGATTTAATGAGAGACATACGATGAAGCGC  
TTTGTTGAGGAGCTGCAAGCACTTGAGGAGTTTTACATTC  
CCACAACCGTCTCTTTAACACACCCTTTGTAACCTCTG  
GCAGTCAAACAGACGTATTTTTCTTGTTGTGAGACCTTAT  
GTAGAATACCCTTATGCACGACTCCGCAGTGTTGCGCTTA  
AATCCATTTGGGTTAATCAAATGGAGTTGAATGATCTTCT  
CGACCGGTTGGAGGAACTCATGACTCGTGATTTGGAAGAT  
GTCAGTATTGGCGGGGTTCCATCTAAAATGTACGTCACGC  
AAGCTATCGGTACGCCGCGAAATAACGACTTTGCGGTGGC  
AGCGTGTGTAGCGCGTGTCCCGGTTACATCCCGATTTG  
TATCCGCTGCAAAGCATAAAAATCCACATCTTTTGCAGT  
GGTTTTATGATTTAAATGTTAATGGTGTATGCGAGGGGA  
GCGTGTGACTATAAGACGGGAAACAATACACATGGAAAT  
ATACTTTTGCTTGATTTCTGTGCAAGAAGGCACTTGTACCG  
TTAAGGGAGTCGACAAACCGATGAATGCCGTTGCATTATG  
CGTTCATTTAAACACCAACCAACCGCAAGGTCATAA

J04841 717-6014 T.BRUCI RNA POLYMERASE IIB LARGEST  
SUBUNIT (RPII197B) GENE, RNA POLYMERASE IIB LARGEST  
SUBUNIT CODING

ATGTCAGGCGGTGCGGCTCTACCGGTTTCCCAGATGGAGT  
TGCACAAGGTGAATGAAGTGCAGTTCGAGATATTTAAGGA  
AAGGCAAATCAAAGTTACGCCGTGTGCCTTGTCGAGCAC

GCCAAGTCGTATGAACGCGGCCGACCAGTCCGGGGAGGCA  
TCAATGATTTGCGTATGGGTACCACTGACTTTCGAATTCGC  
ATGCGAGACATGTCATAGGAAGCACCCAGAGTGCCCTGGA  
CACTTCGGATACATCGAGCTCGCAGAGCCTGTCTTTAATA  
TTGGCGTCTTCGATCTTGTACTGCTGGTGTGGAAGTGTGT  
TTGCAAAAACGTGCGGGGCTCTCCTCCTTAACACGCGCGAA  
CAGGACGTACATAAGAAGTTGCAGCACATGACAGGCCTCA  
ACCGTCTTCGGCAAGTTGCGAAGATGGCTGAGGCAAAGTG  
CCGCGTCTCCACCAGCACCGAAGACGATATGGGGATTGAC  
GGCTTTGATAGTGCCCCTTCAATGGCGGATCAGGGATGG  
GGCCAGGCGCGACACGGGGTTGTGGTGGTCTCAACCCCG  
CGTAAGTCGCTTTTATGGTATCTACCCAACACTCGTTATC  
AAGGCAGTACATGAGGAACAAGACGCCGAGTGGCACGCTG  
ATAAGGTGCGACAGGTACTTGACCGCGTGTCCGATGATGA  
TGCCCGCTTGATGGGCTTCGACCCTCAACGTTGCCACCCA  
CGGGATCTTGTGCTCACTGTGCTTCCAGTTCACCCCCGC  
AGGTGCGGCCCGCAATATCCTTCGGCGGTCTCAGGTCAGA  
TGATGAACTCACGCATCAGATCATGTCCATTGTGAAACGA  
AACAACTACTACGCAGAGATAAGGAGTCAGACGTGCAGG  
CAGCAATTGACCGGAGCCGGGCGTTATTGCAAGAACATGT  
GGCGACATATTTCAATAACGCTTCCACACACTATAAGCCA  
ACGAAGGTGAATGACACAAAGAAGCTCAAGTCATTAACAG  
AGCGCTTGAAGGGGAAGTACGGTAGACTGCGTGGAATCT  
AATGGGGAAGCGGGTGGACTTCTCCGCTCGAACCGTCATC  
ACAGGTGATCCGAACATTGACGTGGATGAAGTAGGTGTAC  
CCTTTTCTGTGCGGATGACGCTTACATTCCCCGAGCGAGT  
GAACACAATAAATAAGAAGCGACTGACGGAGTTTGCCCGG  
CGCACGGTCTATCCGTCGGCGAATTACATACACCATCCGA  
ATGGCACCATAACAAAACCTCGCACTCTTGCGTGACCGCTC  
CAAGGTGACGCTAAACATCGGTGACGTTGTGGAGAGGCAT  
GTGATTAATGGGGATGTGCTCTTGTTC AACCGGCAGCCGA  
CATTGCATCGCATGAGTATGATGGGCCACAGGGTTCCGGT  
TCTCAACTATAACACTTTCCGGCTTAATCTCTCTTGTACC  
ACACCATACAATGCTGACTTCGATGGTGACGAAATGAATT  
TGCACGTGCCGCAGAGTCTCTTAACGAAAGCAGAGCTGAT  
TGAAATGATGATGGTTCCAAAGAACTTCGTCTCGCCCAAT  
AAGTCTGCTCCGTGCATGGGTATTGTGCAAGACAGTCTGC  
TGGGTAGTTACCGGTTGACGGACAAGGACACATTCTCGA

TAAGTACTTTGTGCAAAGCGTGGCACTTTGGCTGGATCTT  
TGGCAGTTACCCATTCCCGCCATTCTGAAACCCCGACCCC  
TCTGGACCGGAAAGCAGGTATTTTCGCTTATCCTTCCTGA  
GGTTAACCATCCAGCAACACCACAGGACCGGCCCCCTTT  
CCTCACAATGATTCCGTAGTGATGATACGACGTGGTCAGC  
TGTTATGTGGACCAATCACTAAGAGTATCGTTGGTGCTGC  
ACCGGGATCACTCATTACGTTATATTTAATGAGCACGGA  
TCTGATGAAGTGGCACGCTTCATCAACGGCGTGCAGCGCG  
TGACGACGTTTTTCTTACTTAACTTCGGTTTCAGCGTTGG  
GGTTCAAGACACCGTAGCTGACAGTGACACCTTGCGGCAG  
ATGAATGATGTCCCTCGTGAAAACACGGAGGAATGTTGAAA  
AAATTGGTGC GGCTGCCAACAACCGTACACTGAACCGCAA  
GGCTGGTATGACACTTCTGCAGTCATTCGAAGCAGATGTC  
AACAGCGCACTGAACAAGTGCCGCGAAGAGGCAGCAAAGA  
AGGCACTGAGCAACGTCCGTCGCACTAACAGCTTCAAGGT  
GATGATTGAAGCAGGCAGTAAGGGTACAGATCTGAACATA  
TGTCAAATTGCCGTCTTTGTTGGGCAACAAAACGTCGCGG  
GAAGCCGTATTCCATTTCGGTTTTTCGTAGGCGCACGCTTCC  
ACACTTTATGCTTGACGATTATGGTGAGACGTCACGCGGC  
ATGGCAAACCGTGGTTACGTTGAGGGTCTGAAACCGCACG  
AGTTTTTTTTCCACACAATGGCTGGTCGTGAGGGTTTGAT  
CGATACTGCGGTGAAAACCTCTGATACAGGGTACCTGCAG  
CGTAAGCTTATCAAGGCGCTAGAAGATGTCCACGCAGCCT  
ACGACGGTACTGTACGAAATGCAAACGATGAACTAATTCA  
GTTTATGTACGGCGAAGACGGTCTTGACGGGGCCCGTATA  
GAGGGTGGGCAGCTGTTCCCTCTTCCCTTTCGGGACGATA  
AGGAGATGGAAGACACGTACAAATATGAGTACGACGTGGA  
TGGCACCTTCAGTGGGAAGGTTGGTGGTAACTATATGGAT  
CCCCACGTTAGGAAGATGCTACGCGCTGATCCCCAAAATG  
TTCGGAAACTTCAGGAAGAATATGAACAGCTTACGGCGGA  
CCGCGAGTGGTCACGCAAAATGCTTGACCTCGAGGATCGT  
GATAAACTGAAGCTTAACCTCCCTGTTAATCCAGGTCGAC  
TTATCCAAAACGCGCGCAGTACTATGGGCAAACGTAGTCA  
AGTGTCCAACCTGAGCCCCATCACTATTATCGACCACGTG  
CGGAAGCTTCAAGAAGATCTCATGAAACTCTTTCCATCTT  
ACCACCGGGGAGGGGATGGATACATCAGGAATACGTTGAG  
TCGTGAACGCATTGAAAGTGC GCTTACTCTCTTCAACGTT  
CATTTGAGGCAGCTACTTGCGTCAAAAAGGGTGCTGAAGG

AATATAAACTTAACGATAGGGCTTTTGAGTATCTTCTCAA  
GGAAATTAGAACCAAGTACCACCAGTCACTCACCACACCG  
GGTGAGAACATTGGGGCAATCGCTGCGCAGTCGTGTGGTG  
AACCTGCCACACAAATGACACTTAACACGTTCCACAATGC  
GGGAATTTCCCTCAAAGAACGTTACCCTCGGTGTGCCACGT  
TACTGGAGCTTCTAAACGTCTCACGAAACCAAAAGCACG  
CGAGCATGACAGTGTCTCTGTTTCCACCATATGATGAAAA  
GCGAAATGCGCAAAAGGCCAGCATCTCATTGAATACTGC  
ACGCTGGAGAGTATCACAAGGCGCATAACAGTTCATCTACG  
ACCCTGACCACGTCACACCGTTGTGGAGGCTGATCGTGA  
CATCCTCGAACTAGAGTGGAAATGTTATGGATGAAAGCGAT  
GCAGAGCTAAGAATACAAGAGGTAGTGGCAGGTTCCGCCAT  
GGGTGGTGAGGTTGGAGCTCGACGTGGATATGGTCACCGA  
CAAGGCCCTCGATATGAAGGATGTGAAGCAAGCTATCCTG  
CGAGTGGATGAAAGCTACATAATTGAAACGGGAATGGCTA  
ACAATGTGCGCCAGCGGACCATAAGAATGCGGTCCAGATA  
TAACGAAGGAGCTGACTCGATCCCAAAGCTTAAGCGTGAA  
ATCCCAGCCCTTCTTGCGCGGGTTCCTTGCGTGGTATTC  
CCGGTGTGCGTCCGGGCGCTGCTGAAGGACACCACCGAATT  
CACTGTAGATCAGGCAACGGGGAAAATGAGTGGCAACAAA  
ATATGGGCAATAGACACGGACGGCACGGCATTGCGACGTG  
CTTTTATTGGTGTTCGTAGGTGAGGATGGTAAGAACATTAT  
TAATGCGGTGAAAACGAGTAGCAACAAAGTGCCTGAGGTA  
TGTAGTCTTCTTGGTATTGAGGCGGCGAGATCAAAGATGT  
TGACGGAACTTCGTGAGGCTTACCTGGCCTATGGTCTCAA  
TATTAACCTACCGCCACTATACTATACTGGTGGATACGATA  
TGTCAGCATGGGTACCTGATGGCTGTTTCTCGCTCAGGAA  
TCAACCGCTCCGATACGTCCGGTCCGTTGATGCGCTGTTT  
ATTTGAAGAACTGTAAAGGTGCTTATGGCGGCTGCATCT  
TTTGGCGAGTGCGATCCCGTGCGTGGGGTATCAGCAAATC  
TTGTGCTCGGTAACCAAGCGCGCTTGGTACGGGGCTTTT  
CGATCTTGTTCTCAACATGGCAGCGCTGCAGCAGGCTGTA  
CCGCAGGCAGAAGCGGTTGCACCCGGAAAGGATGTAAATG  
TGTATCACAGTCTCGGGTCCACGCTGCAGCAAAATATCCA  
ATCCTCCATTGCGTACCGACCAAGAGATCATGATGCAACA  
CCATTTGTAAACAATGCCAGTCTGTTTCTCCGCCAGGGTT  
TCGGTGGGGGCTCCTCCTCCGCACCAGTAACGGCCTCGGC  
CCCATAACAACCCTTCGACGACGTACCACGGCGGTTCGGCTC

GAAGCGAGGGCAGTGCACAGGAGTCAAGCTTATTCTACAT  
CCCCCGCTTTGGAATACGGAGGGCGGGAAGCAAGCGCCTC  
ACAATTGTACAGCGTTATGTCTTCCGCCAGCGCGTTCAAC  
CCAGTTTCAACGCGGATGTCGTCAGTGGCGCACAGTTATT  
CCGAATACAGTGAAGCCTCTTCTTACCACCTGCAACACAG  
CGTGGCGCCAACCTTCCATGCAAGCTTCACTACCAAGAACC  
GACAACTCTATGACCATGCAAGGTATCGGTAGTGTTCAG  
TACCGTACACGCCCCATGCCATGTCCAGTGCTGCCCCACC  
GTCGCAGGTATACGCCAGCACAGAAGTCGGCCGGTCCGCAC  
AGCGAGGACTCGCGGTCCCAGTCAGCTCTCTACGTTCCGA  
CACTCTCACCCACCCACGCGGGTTACGCTATACGAGGTGA  
TGAGCCATCCACACATCGCAGTGAATGTGATGTGG  
CGGGAGGCTGGCGGGGGAAGGGAACAGGATGAGGAAGATG  
ACCTCTCCACGAATTATATGCCCACTGCAAAGACACCCCA  
GCAGGCGGCACCGCCGACAGCCGCAGAGTTTGGGGACGAG  
GAAGAGGAAGAACAGTAA

K02836.1 1-1329 T.brucei rhodesiense alpha (complete) and beta tubulin  
genes 1n 3.7 beta tubulin Coding

ATGCGCGAAATCGTCTGCGTTCAGGCTGGCCAATGCGGTA  
ACCAGATCGGCTCAAAGTTCTGGGAGGTGATCAGTGACGA  
GCACGGTGTGGACCCACAGGTACCTACCAGGGTGA CTCT  
GACCTGCAGCTGGAGCGCATCAATGTGTACTTTGATGAGG  
CAACGGGAGGTGCTATGTGCCCGCTCCGTGCTGATTGA  
TCTGGAGCCAGGTACAATGGACTCCGTACGTGCTGGCCCC  
TATGGTCAGATCTTCCGCCCCGACA ACTTCATCTTTGGAC  
AGTCTGGCGCCGGCAACA ACTGGGCAAAGGGCCACTACAC  
GGAGGGTGC GGA ACTGATCGACTCTGTGCTCGATGTGTGC  
TGCAAGGAGGCGGAGAGCTGTGACTGCCTCCAAGGCTTCC  
AGATCTGCCACTCCCTTGGTGGTGGTACTGGCTCCGGCAT  
GGGTACGCTGCTCATCTCGAAGCTTCGCGAGCAGTACCCT  
GACCGTATCATGATGACTTTCTCCATCATCCCATCCCCA  
AGGTGTCCGACACTGTCGTCGAGCCGTACAATACGACTCT  
CTCCGTGCACCAACTTGTGGAAA ACTCCGATGAGTCGATG  
TGCAATTGACAACGAGGCACTGTACGATATTTGCTTCCGCA  
CCCTGAAACTGACAACACCAACGTTCCGGTGACCTGAACCA  
CTTGGTGTCTGCTGTTGTGTCCGGCGTCACCTGCTGCCTG  
CGTTCCCTGGT CAGTTGAACTCTGACCTCCGTAAGTTGG  
CTGTGAACCTTGTCCATTCCCGCGTCTGCACTTCTTCAT



GATGGGCTTCGCCCGCTGACCAGCCGCGGCTCGCAGCAG  
TACCGCGGTCTCTCCGTGCCCGAGCTAACGCAGCAGATGT  
TCGATGCGAAAAACATGATGCAAGCTGCAGATCCTCGTCA  
CGGCCGCTACCTGACAGCGTCTGCACTCTTCCGCGGCCGC  
ATGTCGACGAAGGAGGTTGATGAGCAGATGCTGAACGTGC  
AGAACAAGAACTCGTCCTACTTCATTGAGTGGATCCCGAA  
CAACATCAAGTCCTCTGTTTTGCGATATCCCACCCAAGGGA  
CTCAAGATGGCTGTCACCTTCATTGGCAACAACACCTGCA  
TCCAGGAGATGTTCCGCCGTGTGGGAGAGCAGTTCACCCCT  
CATGTTCCGTGCGAAGGCGTTCTTGCACTGGTACACTGGC  
GAGGGTATGGACGAGATGGAATTCACGGAGGCAGAGTCCA  
ACATGAACGATCTCGTGTCTGAGTACCAGCAGTACCAGGA  
TGCCACGATTGAGGAGGAGGGCGAGTTCGACGAGGAGGAG  
CAATACTAG

K02836.2 1961-3316 T.brucei rhodesiense alpha (complete) and beta  
tubulin genes 1n 3.7 alpha tubulin Coding

ATGCGTGAGGCTATCTGCATCCACATTGGTCAGGCTGGTT  
GCCAGGTTGGTAACGCCTGCTGGGAATTGTTCTGCCTGGA  
ACACGGCATTCAACCCGATGGTGCGATGCCCTCTGACAAG  
ACGATTGGCGTTGAGGATGATGCGTTCAACACCTTCTTCT  
CTGAGACTGGTGCTGGCAAGCACGTTCCCCGCGCGGTGTT  
CTTGGACCTGGAGCCAACAGTGGTGGATGAAGTGCCGACT  
GGCACGTACCGCCAGCTGTTCCACCCCGAGCAGCTGATCT  
CCGGCAAGGAGGATGCGGCCAACAACACTACGCTCGTGGCCA  
CTACACCATTGGTAAGGAGATCGTCGACCTCTGCCTGGAC  
CGCATCCGCAAGCTCGCTGACAACACTGCACTGGTCTTCAGG  
GCTTCCTCGTGTATCACGCCGTGCGCGGTGGCACTGGTTC  
TGGCCTGGGTGCGCTGCTCTTGGAGCGCCTCTCCGTGGAC  
TATGGCAAGAAGTCCAAGCTCGGCTACACGGTGTATCCAT  
CACCGCAGGTGTCGACGGCTGTGCTGGAGCCCTACAACCTC  
TGTGCTCTCGACACACTCACTTCTGGAGCACACCGATGTT  
GCTGCGATGCTTGACAATGAAGCAATTTATGATTTGACTC  
GCCGCAACCTCGATATTGAGCGCCCCACGTACACCAACCT  
GAACCGCCTCATCGGTCAGGTGGTTTCCTCGCTGACAGCG  
TCCCTCCGCTTCGACGGTGCATTGAACGTGGATCTGACAG  
AGTTCCAGACAAACCTTGTGCCGTACCCACGTATCCACTT  
CGTGCTGACAAGCTATGCACCAGTCATCTCCGCAGAGAAG  
GCCTACCACGAGCAACTCTCTGTCTCTGAGATCTCGAACG

CTGTGTTTGAGCCCGCCTCCATGATGACAAAGTGCGACCC  
CCGCCACGGCAAGTACATGGCGTGCTGCCTCATGTACCGT  
GGTGACGTTGTGCCAAAGGATGTGAATGCTGCCGTCGCGA  
CCATCAAGACGAAGCGCACGATTCAGTTCGTGGACTGGTC  
TCCCACAGGCTTCAAGTGCGGTATCAACTACCAGCCACCC  
ACGGTGGTGCCAGGTGGTGACCTTGCCAAGGTGCAGCGCG  
CGGTATGCATGATCGCCAACTCCACGGCCATCGCAGAGGT  
GTTTCGCCCGTATTGACCACAAATTCGATCTCATGTACAGC  
AAGCGCGCCTTCGTGCACTGGTACGTCGGTGAGGGTATGG  
AAGAGGGTGAGTTCTCCGAGGCCCGTGAAGACCTTGCAGC  
ACTTGAGAAGGACTACGAAGAGGTTGGTGCCGAGTCCGCG  
GATATGGACGGTGAGGAGGATGTGGAGGAGTACTAG

L03778.1 605-1900 nrkA Coding

ATGGCCGAACCGTTCTCGACGATCCTTGGAAACCGACGGCA  
GCGGTGGTCCGGTGTAATACCTGAACAAAGGATTGTAGG  
ATTGGGTTCCCTATGGTGAAGCATATGTAGCGGAGAGCGTG  
GAGGATGGGTCTCTTTGTGTAGCAAAAGTCATGGATTTAA  
GCAAGATGTCTCAGCGGGATAAGCGGTACGCGCAGAGCGA  
AATCAAGTGTCTGGCCAACTGTAATCATCCAAACATTATT  
CGTTACATTGAGGACCACGAGGAAAATGATCGGTTGCTTA  
TTGTCATGGAATTCGCTGACTCAGGCAACCTTGATGAGCA  
AATAAAGCTTCGGGGCTCAGGAGATGCGCGCTACTTTCAA  
GAACACGAGGCCTTGTTTCTCTTCTTACAACCTGTGTCTTG  
CCCTTGACTACATCCACAGCCATAAGATGCTGCACCGCGA  
TATCAAATCTGCCAATGTACTGCTCACATCAACAGGACTA  
GTTAAGCTGGGAGACTTTGGATTCAGTCATCAATATGAAG  
ACACCGTATCAGGCGTCCGTTGCAAGTACGTTCTGTGGCAC  
ACCGTACTACCTGGCACCAGAGCTGTGGAATAATAAAAGG  
TACAATAAGAAGGCTGATGTGTGGTTCGTTGGGTGTTTTAT  
TGTAACGAAATTATGGGCATGAAGAAACCGTTTTTCAGCAAG  
TAATTTGAAAGGTTTGATGTGCGAAGGTTCTTGCTGGCACA  
TATGCTCCCTTGCCGGATAGCTTCTCGTCCGAATTTAAAC  
GTGTTGTTGATGGTATCCTTGTAGCGGACCCTAATGACAG  
ACCAAGTGTAAGGGAAATTTTTTCAGATACCGTACATCAAT  
AAGGGTCTTAAATTATTTGTGCAAGCACTGAAGAAAAACG  
AACGAATTTCCGACTCCGGTGAAGGAGGTCCTCGTAACACA  
GGTCAGCGAAATCTTATCCTCGGAAGTGAGCCCTGATGCA  
CATCGTTTTCTGGTATCACAAATTAACACTACGACGTTACAC

ACCGAGGACATGTAAACAAACTGGGTGGTGGAAACGGGAA  
GTCGTGGAAACCGAGGTTTTTGCAGATTGTTTCGCGGACAG  
CTCATTTTAAACAGATGATGAAGAAGGAAATAATCCAAAAG  
GCCTAAACCTTGAACAAGTGCAGGGTGCTTGCCCGGTGCC  
TCACAGTACTGCAAAGAGAGATTTTTGTGTTTGCCCTCAAT  
ACGGTCGGCGGAAAGGGTATGTGGTTTCAGGCTGTATCAC  
ATGGGGACATGGAAATGTGGGTTTCACGCGATTCAACGTGG  
TATAGGTGTCGCCTAA

L10721.1 247-879 Trypanosoma brucei hypoxanthine-guanine  
phosphoribosyltransferase Coding

ATGGAACCAGCTTGCAAATACGACTTCGCAACGAGTGTCC  
TCTTTACAGAGGCAGAACTACACACTCGCATGCGCGGTGT  
GGCGCAGCGTATTGCCGATGACTACAGCAACTGCAATTTG  
AAGCCACTTGAAAATCCTCTGGTAATTGTGTCTGTATTGA  
AGGGCAGCTTCGTCTTCACTGCTGACATGGTTCGCATTCT  
TGGTGATTTTGGCGTCCCCACACGTGTGGAATTCCTGCGG  
GCCTCGTCATATGGTCACGATACTAAAAGTTGTGGTTCGAG  
TTGACGTGAAGGCTGACGGTCTTTGTGACATCCGCGGAAA  
ACATGTCCTTGTTTTGGAGGATATACTTGATACTGCGCTG  
ACGTTGAGGGAAGTGGTGGACAGCTTGAAAAAGAGCGAAC  
CCGCGAGCATTAAAACCCTCGTGGCTATCGACAAACCCGG  
TGGGCGTAAAATACCTTTCCTGCGGAATACGTTGTGGCG  
GATGTTCCCAATGTGTTTCGTGGTTGGCTACGGGTTGGATT  
ACGACCAATCATACCGTGAGGTGCGTGATGTTGTAATCCT  
AAAACCGAGCGTGTATGAAACATGGGGAAAGGAACTTGAG  
CGGAGGAAGGCCGCTGGAGAAGCCAAGCGGTAA

L14477 262-2223 TRYPANOSOMA BRUCEI BIP/GRP78 GENE,  
COMPLETE CDS. CODING

ATGTCGAGGATGTGGCTGACCACTGCAGCGGTGTTCCCTGA  
CTGTGACGGTTGCAGCCGTCTCAGCAGCACCCGAAAGTGG  
CGGCAAGGTGGAAGCACCATGCGTGGGCATCGACCTCGGC  
ACAACATACTCCGTTGTGGGTGTGTGGCAGAAGGGTGATG  
TGCATATCATCCCGAACGAGATGGGTAACCGCATCACACC  
TTCCGTGCGTCGCCTTTACCGACACAGAGCGGCTGATCGGT  
GACGGTGCAGGAATCAGCTTCCACAGAATCCGCATAATA  
CAATCTACACCATCAAGAGGCTGATTGGCCGCAAGTACAC  
GGATGCGGCAGTGCAGGCTGACAAGAACTGCTGTCGTAT  
GAGGTCATTGCGGACCGCGACGGGAAGCCGAAGGTACAAG

TGATGGTGGGTGGGAAAAAGAAACAGTTCACACCAGAAGA  
GATCAGTGCCATGGTGCTGCAGAAGATGAAGGAAATTGCA  
GAAACGTACCTTGGCGAGAAAGTGAAAAACGCTGTTGTAA  
CGGTACCTGCGTACTTCAATGACGCACAACGGCAGTCGAC  
AAAGGATGCTGGGACCATCGCCGTTTGAACGTAGTGCGC  
ATCATCAATGAGCCCACCGCAGCCGCCATCGCATATGGGC  
TAAACAAAGCCGGTGAGAAGAATATCCTGGTGTTGATCT  
TGGTGGTGGTACCTTTGATGTGTCACTGCTGACAATCGAT  
GAGGGCTTCTTTCGAAGTTGTGGCGACAAACGGTGATACGC  
ACCTTGGTGGTGAGGACTTTGATAACAACATGATGCGACA  
CTTTGTGGACATGCTGAAGAAGAAAAAGAATGTTGACATC  
AGTAAGGACCAAAAGGCACTGGCACGTCTTCGCAAGGCAT  
GTGAGGCTGCGAAGCGACAGCTGTCGTCTCATCCCGAGGC  
GCGTGTGGAGGTGGACAGCCTTACGGAGGGCTTTCGATTTG  
AGCGAGAAAATCACACGTGCGAAGTTTGAAGGAGCTGAACA  
TGGACCTCTTCAAGGGGACACTCGTGCCCGTGCAACGTGT  
GCTGGAGGATGCGAAGCTGAAGAAGAGTGACATCCACGAG  
ATTGTGCTCGTTGGTGGATCCACACGTGTGCCGAAGGTAC  
AACAACTGATCAGTGACTTCTTCGGTGGGAAGGAACTGAA  
CCGTGGTATTAACCCCGATGAAGCCGTAGCATATGGTGCC  
GCTGTGCAAGCTGCGGTGCTAACCGGTGAAAGCGAGGTTG  
GCGGGCGCGTTGTGCTTGTAGATGTGATCCCACTGTGCGT  
TGGTATTGAAACTGTAGGTGGTGTGATGACAAAACCTCATC  
GAGCGTAACACACAGATCCCCACCAAGAAGAGTCAGGTCT  
TTTCTACCCATGCGGACAACCAGCCGGGTGTGCTTATCCA  
AGTGTATGAGGGTGAGCGCCAGCTGACAAAGGATAACCGC  
CTCCTGGGCAAATTCGAGTTGTGCGGAATTCCTCCTGCCG  
CGCGTGGTGTGCCACAAATCGAAGTGACATTTGACGTCGA  
CGAGAACAGCATCCTGCAGGTGAGCGCTATGGACAAGTCG  
TCTGGAAAGAAGGAAGAGATCACCATCACCAACGACAAGG  
GTCGCCTGAGCGAGGAGGAGATTGAGCGTATGGTGCGCGA  
AGCGGCAGAGTTCGAGGACGAGGACCGCAAGGTGCGCGAG  
CGTGTGGATGCGCGTAACTCGCTGGAGAGCGTTGCGTATT  
CCCTACGCAACCAAGTGAACGATAAGGATAAGCTTGGTGG  
GAAACTTGACCCCAATGACAAGGCTGCAGTGGAGACCGCT  
GTTGCGGAGGCGATCCGCTTCTTGACGAAAATCCGAACG  
CCGAAAAGGAGGAGTACAAAACCTGCCCTGGAAACTCTGCA  
GAGCGTGACCAACCCCATCATCCAGAAGACTTACCAATCC

GCCGGCGGAGGCGACAAGCCACAACCCATGGACGATCTGT  
AA

M14697.1 449-2434 T.brucei heat shock protein 70 (hsp 70) mRNA, (gene 4  
in heat shock heat shock protein Coding

ATGACATACGAAGGCGCCATTGGTATCGACCTCGGTACGA  
CGTACTCGTGCGTTGGTGTGTGGCAGAACGAACGTGTGGA  
AATCATTGCAAATGACCAGGGTAACCGTACGACGCCGTCC  
TACGTTGCCTTCACGGACTCTGAGCGCCTGATCGGCGATG  
CGGCGAAGAACCAGGTGGCGATGAACCCTACGAACACGGT  
GTTTCGACGCGAAACGACTGATCGGACGGAAGTTCTCCGAC  
TCTGTCGTGCAGTCCGACATGAAGCACTGGCCCTTCAAGG  
TCGTCACCAAGGGCGACGACAAGCCAGTGATCCAGGTACA  
GTTCCGCGGTGAGACGAAAACCTTCAATCCTGAGGAGATC  
AGTTCCATGGTACTATTGAAGATGAAGGAGGTTGCGGAGT  
CGTATCTTGGGAAGCAGGTGGCTAAGGCTGTCGTAACAGT  
GCCTGCATACTTCAACGACTCGCAGCGCCAGGCAACGAAG  
GACGCGGGGACGATTGCTGGTCTGGAGGTGCTGCGCATCA  
TCAACGAGCCAACGGCTGCTGCAATTGCCTATGGCCTGGA  
CAAGGCTGATGAGGGGAAGGAACGCAACGTGCTCATCTTC  
GATCTTGGTGGTGGCACCTTCGATGTGACATTGCTGACGA  
TTGACGGCGGCATCTTCGAGGTGAAAGCCACAAATGGTGA  
CACCCACCTTGGTGGAGAAGACTTCGACAATCGCCTTGTG  
GCTCACTTTACCGAGGAATTCAAGCGCAAGAACAAGGGCA  
AGGATCTCTCATCGAACTTGCGCGCCCTTCGCCGCCCTTCG  
TACGGCTTGTGAGCGCGCCAAACGCACACTTTCTTCCGCT  
GCGCAGGCAACCATCGAGATCGATGCACTCTTCGAAAACA  
TTGACTTCCAGGCGACCATTACCCGTGCTCGTTTTCGAGGA  
ACTGTGCGGTGACCTGTTCCGTGGTACATTGCAACCCGTA  
GAGCGTGTGCTGCAGGATGCCAAGATGGACAAACGCGCCG  
TGCACGATGTGGTCCTGGTTGGTGGTTCCACCCGTATCCC  
CAAGGTGATGCAGCTTGTGTCTGACTTTTTTCGGTGGCAAG  
GAGCTTAACAAGAGCATCAACCCCGACGAGGCAGTNNNGT  
ACGGCGCTGCTGTACAAGCTTTCATCTTGACCGGTGGTAA  
GAGCAAGCAAACGGAAGGTCTCCTCCTTCTGGATGTCGCC  
CCGCTTACGCTCGGCATCGAGACGGCAGGTGGCGTGATGA  
CGGCACTGATCAAGCGCAACACGACGATCCCCACCAAAA  
GAGCCAAATCTTCTCCACATACTCAGACAATCAGCCCGGT  
GTGCACATTCAGGTCTTTGAGGGTGAGCGTACCATGACGA

AGGACTGCCATCTCTTGGGCACCTTCGATCTCTCTGGAAT  
CCCCCGGCACCCCGCGGCGTGCCACAGATAGAAGTGACC  
TTCGACCTAGACGCTAATGGTATTCTTAGCGTTTCTGCGG  
AGGAGAAGGGCACTGGCAAGCGCAACCAGATTGTCATCAC  
AAACGACAAGGGTCGCCTGAGCAAGGCTGATATCGAACGC  
ATGGTGTCTGATGCTGCGAAGTATGAGGCTGAGGATAAGG  
CGCACGTGANNGCATTGATGCTAAGAACGGTCTTGAGAA  
CTACGCCTTCTCGATGAAGAACACTATCAATGACCCCAAC  
GTTGCTGGCAAGCTTGACGACGCCGACAAGAATGCTGTCA  
CCACTGCCGTGGAGGAGGCACTGCGATGGCTGAACGACAA  
CCAGGAGGCCAGTTTGGAGGAATACAACCACCGCCAGAAG  
GAGCTCGAAGGCGTGTGTGCTCCCATCTTATCAAAGATGT  
ACCAGGGCATGGGCGGTGGCGACGGGCCTGGCGGTATGCC  
CGAGGGTATGCCCGGTGGTATGCCCGGTGGTATGCCCGGA  
GGAATGGGTGGTGGGATGGGAGGCGCTGCGGCATCGTCCG  
GGCCTAAAGTCGAGGAGGTTGACTAA

M20570.1 307-1725 T.brucei glycosomal protein p60 gene, complete cds.  
glycosomal protein Coding

ATGGCTCCTATAATTCACAAGAATCTCACCCGCCCCCGAGT  
TGGTGGAGTGGGCTCTTAAGCTTGAAAAGGACTCCCAACT  
GACGGCTCGTGGCGCCCTGAGCGTACGCTCATA CGCAAAG  
ACTGGCCGCTCTCCTCGCGACAAGCGTATTGTAAACACCA  
CTGACGTTACTGACAATGTGGACTGGGGCAGCGTAAACAT  
GAAGCTGACCGAAGAATCATTTGAGAAACTGAAGACAATC  
GCAAAGGATTACTTCGCCACCTGCAAACACCTGTTTCGTCA  
TGGACTGCTTTGCCGGCCACGATGAACGGTACCGCCTGAA  
GGTGC GCGTGTACACTACCCGCCCTTACCACGCACTTTTC  
ATGCGCAACATGCTAATTGTGCCTACGTTAGAGGAGCTGC  
AGAGTTTTTGGTGAACCGGACTATGTCATCTACAACGCCGG  
AGAGGCAAAGGCTGATCCGACGGTCCCCGGTGTTACCTCA  
ACAACGTCAGTGGCCCTGAACTTTAAGACCCGCGAACAGG  
TCATTCTTGGGACAGAGTACGCTGGTCAAATGAAGAAGGG  
TATTCTGACTGTGATGTTTGAATTGATGCCACGCATGGGA  
CACTTATGCATGCATGCAAGCGCTAACGTGGGTAAGAGCG  
GTGACGTGACGGTCTTCTTTGGACTCAGCGGAACCGGCAA  
AACGACTCTCTCTGCGGACCCGCGCCGCAACCTCATTTGGC  
GATGACGAGCATGTGTGGACGGACCGTGGTGTGTTTAAACA  
TTGAAGGCGGGTGCTATGCTAAGGCGATTGGTTTGAACCC

CGAAACCGAGAAGGATATTTATGAGGCTGTGCGCTTTGGC  
GCTGTTGCCGAGAATTGTACTCTTGACAGGAGAACCCATG  
AAATTGACTTTAATGATGAATCTATCTGCAAAAACACCCG  
CGTTGCCCTACCCTCTCATGCACATCGACGGTGCGCTTTTCG  
AAGGCTGTTGCGGGCCACCCGAAGAACATCATTTCCTTGA  
CGAACGATGCCCTTTGGCGTGATGCCCTCCCGTGGCACGCCT  
AACGAGTGCTCAAGCTATGTTCTGGTTCGTGATGGGCTAC  
ACGGCTAACGTCCCTGGTGTGGAAGCAGGAAGCGCTCGCG  
TCGCTCGCCCCATTTTTTTCCTCGTGCTTCGGTGGGCCATT  
CCTTGTTTCGTTCATGCCACTCATTATGGCCAGCAACTGGCT  
GAGAAGATGGAAAAGCACAATAGCCGCGTTTGGCTGCTGA  
ACACGGGTTATGCAGGCGGCCGTGCTGACCGCGGGGCTAA  
GCGCATGCCCTTTGCGCGTCACCCGTGCCATCATTGATGCT  
ATTCATGACGGTACACTTGACCAGGCGGATTATGAAGTGT  
ATCCCGGATGGGCCTTCACATTCCTAAGAGGGTTGCGAAC  
GTGCCCCGCAAGCCTGTTGA

M26803 76-3741 T.BRUCI DNA TOPOISOMERASE II (TOP2) GENE,  
COMPLETE CDS. DNA TOPOISOMERASE II CODING

ATGGCGGAGGCACACAAGTATAAGAAGCTCACACCTATTG  
AGCATGTA CTACACGACCAGAGATGTACATTGGTAGTCT  
CGACACAACGGCAACCCCATGTTTATATACGATGAACAG  
AAGGGTCACATGGTGTGGGAGACGGTGAAACTGAATCACG  
GTTTGCTGAAAATCGTGGATGAAATTCTGCTAAATGCATC  
TGATAACATCTCCAACAGAAGTGCGCGCATGACGTATATC  
CGCGTGACCATCACGGACACGGGTGAGATTACTATAGAGA  
ACGACGGTGCTGGGATCCCCATCGTACGCAGTCGGGAGCA  
TAAATTATATATAACCAGAGATGGTATTCGGTCACCTACTT  
ACCAGCTCTAATTATGATGACGATAACCAAATGCAGTTG  
CTGGTCGCCACGGTTACGGTGCAAAGCTAACCAACATTCT  
TTCCCTGAGCTTTTCCGTCTGCTGCCGCACAAATGGGAGG  
GAGTTTCACATGAGTTGGCAGGATCACATGAGGAAGGCAA  
CGGCTCCACGCGTTTCAAACGTCCGGCACAAAAGAGAAAA  
TGTCACGCGTGTGAAGTTTCTCCCCGACTACGAGCGATTT  
GGCATGAAGGAGAAGAAAATTTCAAACGACATGAAGCGTG  
TGCTCTACAAGCGCATTATGGACCTTTCCGCAATGTTTCC  
GAATATTCAAATAACCCTGAACGGCTCATCCTTTGGCTTC  
AAGTCCTTTAAGGACTATGCGACTCTGTACAGTGCCATGA  
CCCCAAAGGGAGAGAAACCACCGCCACCATACGTATACGA

GAGTAAAAGCGGTTGCGTTGCCTTCATTCCTTCAGTAGTC  
CCCGGGGTGCGGCGGATGTTTGGTGTGGTCAACGGTGTGG  
TAACGTATAATGGCGGTACGCATTGCAATGCTGCGCAGGA  
TATATTGACCGGCTGCCTCGATGGCGTGGAACGGGAATTA  
AAGAAGGAGAACAAAGTGATGGACACTAATCGAGTGCTTC  
GTCACTTCACTATTCTAGTTTTCTCGTGCAGGTGCAGCC  
AAAGTTTGATTCTCAGAATAAAGCTCGACTTGTTTCTACC  
CCCACGATGCCCCGTGTTCTCGGCAAGATGTGATGAAAT  
ATCTTCTGCGCATGCCTTTTTCTCGAGGCTCATGTGAGTAC  
TATTACGGGGCAGTTAGCGCAGGAACTAAATAAGGAGATC  
GGCACC GGACGCCGTATGAGTAGCAAAACCCTCCTGACCT  
CCATAACGAAACTGGTAGATGCAACTTCTACACGCCGTGA  
CCAAAACATACCCGCACGTTAATTGTTACTGAGGGTGAC  
TCCGCAAAGGCTCTCGCGCAGA ACTCTTTATCGAGTGACC  
AAAAGCGATATACAGGCGTATTTCCGCTTCGGGGTAAGCT  
GCTAAACGTGCGTAACAAGAATCTTAAGCGACTGAGGAAC  
TGCAAGGAGTTGCAGGAACTGTTTTGTGCCCTGGGGCTTG  
AGCTAGATAAAGATTACACCGACGCCGATGAATTACGGTA  
CCAACGCATACTTATCATGACAGATCAGGACGCAGATGGC  
TCACACATTAAGGGTTTGGTTATCAACGCGTTCGAGTCTT  
TGTGGCCCTCGTTGCTGGTACGCAATCCTGGGTTCATCTC  
TATATTCTCCACACCCATCGTAAAGGCACGACTGCGCGAC  
AAGTCGGTGGTATCCTTCTTCAGCATGAAGGAGTTTCACA  
AGTGGCAGCGCTCAAATGCAAATACACCATAACACATGTAA  
GTACTATAAGGGTCTCGGTACTTCTACCACTGCTGAGGGA  
AAAGAGTACTTCAAGGATATGGAGAAACACACAATGCGCT  
TACTCGTGGACCGCTCCGATCATAAGCTTCTTGACAATGT  
TTTCGACTCACAGGAGGTAGAATGGCGAAAGGACTGGATG  
ACCAAGGCGAATGCTTTTACCGGCGAGGTAGATATTGATC  
GTAGCAAGAAAATGCTAACGGTCACAGATTTTGTGCATAA  
GGAGATGGTTCATTTCCGCCCTTGTTGGTAATGCCCGTGCG  
CTTGCGCACTCTGTAGACGGGCTTAAGCCTTCTCAGCGAA  
AGATTATTTGGGCTCTTATGCGGCGGTCCGGTAATGAGGC  
GGCGAAGGTGGCACA ACTATCAGGTTACATATCAGAAGCT  
TCCGCTTTTCATCATGGTGAGACTTCATTGCAGGAGACGA  
TGATTAAGATGGCGCAGAGCTTCACTGGTGGTAACAACGT  
CAACCTTCTCGTCCCTGAGGGTCAGTTCGGTTCTCGTCAG  
CAACTCGGTAATGATCATGCGGCGCCCCGTTACATTTTCA



CAAAGCTTTCAAAAGTAGCCCGCTTGCTTTTCCCTAGTGA  
AGATGACCCATTGCTAGACTACATTGTGGAAGAGGGTCAG  
CAGGTGGAGCCGAACCATTACGTTCCAATCCTACCGCTGC  
TCCTCTGCAACGGAAGTGTGGGCATCGGTTTCGGGTTTTC  
GTCGAATATTCCACCATTCCACCGGTTGGACGTATCTGCA  
GCGGTACGAGCGATGATTAGCGGCGAACGTGCCAAGTCGG  
TTGTCCGTCGACTTGTGCCGTGGGCTGTAGGCTTTCAGGG  
TGAGATACGTTCGTGGCCCCGAAGGAGAGTTTATTGCTGTG  
GGAACGTATACTTACTGTAAGGGTGGTCGTGTGCATGTTA  
CGGAGCTTCCTTGGACGTGTAGCGTTGAAGCATTCCGTGA  
GCACATTTCTTACCTCGCCACAAAGGATATTGTTAACCGC  
ATTGCCGACTATTCCGGCGCCAATCACGTTGACATTGATG  
TGGAAGTTGCTCAGGGTGCGGTGAACACGTATGCTGAGTG  
CGAGTCGGAACCTTGGCCTCACGCAACGTATTCACATCAAC  
GGTACAGTCTTTTCACCGAATGGAACCTTTTCACCTCTGG  
AAAGTGACCTCACACCCGTCCTCCAGTGGCACTACGACCG  
CAGACTTGATTTATATAAAAAGAGGCGACAACGTAATTTG  
ACGCTGTTGGAGCAGGAATTGGCCAGAGAGAAGTCGACAC  
TCAAATTTGTGCAACACTTCGGTGCCGGCCACATTGACTT  
TGCGAATGCTACGGAGGCAACACTTGAAAAGGTGTGTTCA  
AAGTTAGGGTTAGTACGTGTAGATGACTCGTTCGACTACA  
TTTTGCGTAAACCCATCACGTTCTATAACCAAAACAAGTTT  
TGAAAATCTTCTCAAGAAGATCGCGGAGACGGAGCGGCGC  
ATTGAAGCTCTCAAGAAGACAACCCCTGTGCAGTTGTGGT  
TGGGCGAACTTGATCAATTTGATCGCTTCTTTCAGGACCA  
TGAGAAAAAGATGGTGGAGGCTATTTTGAAGGAAAGAAGG  
CAGCGATCACCCCGAGCGACCTTCTCCCTGGTCTTCAAC  
AGCCGCGTCTGGAGGTGGAGGAGGCAAAGGGTGGTAAAAA  
ATTTGAGATGCGGGTTCAGGTGCGAAAGTACGTCCCTCCA  
CCAACCAAGCGGGGAGCAGGGGGCCGTAGTGATGGTGACG  
GAGGCGCAACTGCGGCCGGTGCTGCTGCAGCCGTGGGGGG  
AAGAGGTGAAAAGAAGGGCCCGGACGAGCCGGTGGGGTT  
CGACGTATGGTACTCGACGCCCTTGCGAAGCGTGTGACAC  
GTTTGCTGCCGCGTCTGCTGTTCTAG

M27163 J05074 271-4863 TRYPANOSOMA BRUCEI RNA  
POLYMERASE III LARGEST SUBUNIT (RPIII170) RNA  
POLYMERASE III CODING

ATGCTAAAAGGAAGTAGCAGTACATCTTTCCTGCTTCCGC

AGCAGTTTGTGGAACCGCTTCCTCACGCACCTGTAGAGAT  
TAGTGCACTACACTACGGCCTTCTTTCTCGTAACGATGTG  
CATCGTCTTTCCGTACTTCCATGTGCGCCGTGTTGTTGGTG  
ATGTTAAAGAGTACGGTGTCAATGACGCCCGTCTTGGCGT  
ATGCGACCGTCTTTCCATCTGCGAACTTGCGGACTCAAC  
AGCATCGAGTGTGTTGGACACCCGGGTCACATTGACCTCG  
AGGCACCAGTTTTTTCATCTTGGTTTTCTTCACCACAGTGT  
GCCAATTTGCCGTACTATATGCAAACGCTGCTCGCATGTG  
TTACTAGATGATACTGAAATCGATTATTATAAGAGGCGTT  
TGTCGTCTTCATCCCTCGAACCGCTGCAGCGCACGATGCT  
CATTAAAACGATACAAACGGATGCATATAAGACACGTGTG  
TGCCTTAAGTGTGGCGGTCTGAACGGCGTAGTACGGCGTG  
TGCGACCAATGAGGCTTGTTACGAAAAATATCACGTGGA  
GCCTCGCCGTGGTGAGGGGCCTAGGGAGAACCCTGGTGGT  
TTCTTTGACGCTGAGCTGCGAACTGCATGTGCTTACAACA  
AGGTCGTGCGCGAGTGTAGAGAGTTCGTCCACGACTTCCT  
TGACCCCGTACGTGTCCGGCAGCTATTTCTTGCGGTTCCA  
CCTGGGGAAGTCATACTGTTAGGCCTAGCTCCTGGAGTTA  
GTCCTACGGATCTACTCATGACAACACTTCTTGTGCCTCC  
CGTGCCCGTGCGGCCACGAGGGTGTGCGGGGACAACGACC  
GTTTCGCGATGATGATCTCACAGCTCAGTACAACGACATCC  
TGGTCAGCACAGATAACCATGCAGGACGGATCTCTTGATGC  
CACTAGGTATACGGAGACGTGGGAGATGTTGCAGATGAGG  
GCAGCGAGGCTACTTGATTCGAGTCTTCCGGGGTTTCCAC  
CAAATGTCCGTACCAGTGATTTGAAATCATATGCTCAAAG  
ACTAAAGAGCAAACATGGCAGGTTCCGCTGTAACCTCAGT  
GGGAAACGTGTAGACTACTCGGGTTCGCTCCGTCATTTAC  
CCGACCCAAATCTTGATGTGGATGAGCTCGCAGTGCCCT  
TCATGTTGCCCGTGTGCTGACCTACCCTCAAAGAGTTTTC  
AAGGCCAACCATGAGCTAATGCGTCGACTTGTGCGCAACG  
GCCCGCACGTTACCCCTGGCGCCACTACCGTTTACCTGGC  
GCAGGAAGGCTCAAAGAAGTCCCTCAAGAACGAGCGGGAC  
CGACACCGCCTGGCAGCACGCCTTGCAGTTGGAGACATTG  
TTGAGCGACATGTGATGAATGGTGACTIONTTTATTATA  
TCGCCAGCCTTCGCTTCATCGTGTTCATGATGGCCCAT  
CGTGCTCGAGTGCTGCCTTTCCGCACGTTTCGTTTTCAATG  
AGTGTTGTTGCGCACCTTATAATGCTGATTTTCGATGGTGA  
CGAAATGAATGTGCATTTTGTTCAAACCGAAAAGGCTCGG

GCAGAAGCTCTTCAACTTATGTCCACCGCGAGGAACATCA  
TTTCAGCGAAAAATGGTGAGCCAATTATTGCGTGTACACA  
AGATTTTTTTGGCCGCTGCATACCTTGTAACATCTCGCGAT  
GTTTTTTTTGACCGTGGCGAGTTCTCGCAGATGGTGTCCG  
ATTGGCTCGGCCAGTAACGCAATTTAGACTGCCCATTC  
CGCTATATTGAAACCCGTAGAGCTATGGACGGGAAAACAG  
TTGTTTGAACCTATTGTACGCCCTCACCTGAGGTGGATG  
TACTGTTGAGTTTTGAGGCTCCAACAAAGTTCTACACGAG  
GAAGGGTAAGCACGACTGTGCAGAGGAGGGCTATGTGGCA  
TTCCTTGATTCCCTGTTTTATATCAGGCCGCCTCGACAAGA  
AGTTATTAGGTGGAGGAGCAAAGGATGGACTTTTTGCACG  
GCTGCACACCATTGCTGGGGGTGGGTACACAGCGCGTGT  
ATGTCTCGCATTGCACAGTTCACTTCACGGTACCTAACAA  
ATTATGGGTTTAGCCTGGGCCTCGGCGATGTTGCGCCAAC  
CCCAGAGTTGAACAAACAGAAAGCAGCAGTTCTAGCGCGC  
TCTGTAGAGGTATGTGATGGTTTTAATCAAATCAGCGAAGA  
CGGGGCGGATGATACCCCTTCCGGGTCTTACTGTCAAGCA  
ATCACTGGAGGCGCGTCTCAATACGGAGTTGTTCGAAGGTG  
CGTGACGAGTGCGGTACCGCAGCCGTGCAAACACTTTCCA  
TCCACAACAATACGCCACTGATCATGGTGCAATCGGGTAG  
TAAAGGTAGTGCCCTGAACATTGCTCAAATGATGGCCTGC  
GTGGGCCAGCAGACTGTAAGTGGGAAGCGTATTTTTGGACG  
CCTTTCAGGACCGCTCGCTCCCACATTTCCACCGTTTTGA  
AGAGGCACCTGCAGCCCGTGGGTTTTGTGGCTAACTCGTTT  
TACTCTGGCCTCTCCCCGACAGAGTTTTTCTTTCACACAA  
TGGCAGGACGTGAGGGTCTCGTTCGATACGGCAGTCAAGAC  
GGCAGAAACGGGGTATATATATATCGGCGCCTGATGAAGGCA  
ATGGAAAACCTTGAGCGTACGGTACGACGGCACGGTGCGTA  
ACACGAAGGGAGACGTAATACAGCTAAGGTTTTGGTGAAGA  
TGGCCTTGACCCTCAGCTCATGGAGGGTAATAGCGGCACA  
CCTCTGAACCTTGGAGCAGGAATGGCTTAGTGTTTCGAGCGG  
CGTATGCACGTTGGGTCTGTTGGACTGCTTGCTGGAAGTAA  
GACGGCAAGTGACGGAAATGCAATACGAGATAATGAAAAT  
TACTTTAACGAGTTTATTTTCGATGCTTCCAACAGAGGGAC  
CTTCGTTTGTAGAAGCGTGCTTGAATGGGGATCAAGAGGC  
GCTAAAAGTTTGTGAGGAACAGGAGTCTCGAGAAGATGCT  
TTGCATAACAGCAACGGGAAAATAATGATAGGGAGAGCA  
GGCCACGTACAGGAAGACTGCGTCGGGCAGTGTTAATTC

CCATCTGGTTAAAGTTTGCAGTAGAAAAGTTCAAAGATGAT  
ATCCAAGACTTCTTTCGTGAAAAAGGTGAGGGAACAGCAAC  
GGATCCGCAACCTGCTCAACCTTCCCAACACGAGTCGTGA  
GCGAACGGAGGGGGGAGGTGACAATAGTGGGCCTATTGCA  
AATAAGAGAACCAAAAAGAGAGCACCGTCACTGAAGGTCA  
AAGACAGCAAAGAAGGGGGAAGGGTTTCCGAGTTGCGGGA  
CCTTGAGATGCTTCAGACCGAACTACTTCCGCTGACACGC  
GGAATGGTAACACGATTCATTGCTCAATGCGCAAGCAAGT  
ATCTGCGTAAGGCATGTGAGCCTGGTACCCCGTGCGGGCGC  
CATTGCTGCCCAATCTGTTGGTGAGCCAAGTACCCAGATG  
ACTTTGCGTACCTTTCACTTTGCTGGTGTGGCGAGCATGA  
GCATTACGCAGGGTGTTCCTCGACTAGTGGAGGTCATCAA  
CGCCAATCGCAATATTGCTACACCCGTTGTACAGCTCCA  
GTACTACTTATGGAAGGCGAGGAAAACCATTGCGAAATAT  
TCAGGAAGCGGGCACGGTTCGTGAAGGCCAGATTGAGCG  
CGTGCTGTTACGTGAGGTTGTGTCCGAAATTGTGGAGGTG  
TGCAGTGACACTGAATTTTACCTCCGTGTGCACCTTAATA  
TGTCCGTTATTACAAAACCTGCATCTACCCATCAACGCCAT  
CACCGTTCGTCAGCGCATTCTTGCGGGCCGCTGGGCATACC  
ATGTCTCCCCTTCGGATGCTAAACGAGGATTGTATAGAGG  
TATTCAGCCTCGACACACTCGCTGTATATCCCCACTTTCA  
GGATGCCCGTTGGGTTCACTTTAGTCTCCGACGCATCCTC  
GGGTTACTCCCCGAAGTTGTAGTTGGGGGCATCGGAGGCA  
TTAACCGTGCGATGATATCCTCAAACGGCACTGAAGTGTT  
GGCAGAAGGCGCGGAGCTGCGTGCCGTAATGAATCTTTGG  
GGTGTCGACTCTACTCGGGTGGTCTGTAATCACGTGGCCG  
TGGTGGAGCGTGTGCTGGGTATTGAAGCTGCGCGCCGTGT  
GATCGTGGACGAGATACAAAACATACTCAAGGCATACAGT  
CTAAGCATTGACGTTTCGGCACGTGTACCTCCTTGCGGATC  
TCATGACTCAACGAGGTGTGGTGCTTGGAATTACGCGATA  
CGGCATTCAAAAAATGAACTTCAACGTTCTTACCATGGCT  
TCATTTGAGCGCACCCACGGACCATTTGTACAATGCCGAG  
CCACTCAACGAGTTGACCGGGATCTCAGTGTGTCAGACAG  
TATTATCGTAGGGAAACCTGTCCCATTAGGGACAACATCC  
TTCGATCTCTTGTTAGACGGTTCCATAAGCAACGATGTTT  
TCCCTCCTCAGCGTTGCGTGAAACGCGGGATGGGCCCAA  
CTTCCACACCGCAAACGACATCATCTGGTACCTCTTGCC  
GCTGAGGGTGTTTTTTCGTTTGGATCTTTTTTAA

M32139.1 331-2361 T.brucei heat shock-related protein gene, complete cds.  
heat shock-related protein Coding

ATGACATACGAAGGCGCCATTGGTATCGACCTCGGTACGA  
CGTACTCGTGCGTTGGTGTGTGGCAGAACGAACGTGTGGA  
AATCATTGCAAATGACCAGGGTAACCGTACGACGCCGTCC  
TACGTTGCTTTCGTCAATAATGAGGTTCTTGTTGGCGATG  
CGGCGAAGAGCCACGCCGCTCGTGGCTCGAATGGTGTAT  
ATTTCGACGCGAAACGGCTGATCGGACGGAAGTTCTCCGAC  
TCTGTCGTGCAGTCCGACATGAAGCACTGGCCCTTCAAGG  
TCGAGGAGGGCGAGAAAGGTGGTGTGTGATGAGGGTAGA  
GCATCTTGGAGAGGGGATGTTACTGCAGCCCGAGCAAATA  
TCTGCCCGTGTCTTTCGTACCTGAAGTCTTGTGCGGAGT  
CGTATCTTGGGAAGCAGGTGGCTAAGGCTGTCGTAACAGT  
GCCTGCATACTTCAACGACTCGCAGCGCCAGGCAACGAAG  
GACGCGGGGACGATTGCTGGTCTGGAGGTGCTGCGCATCA  
TCAACGAGCCAACGGCTGCTGCAATTGCCTATGGCCTGGA  
CAAGGCTGATGAGGGGAAGGAACGCAACGTTTTTGGTGT  
GACTTTGGAGGTGGAACGTTTTGACGTCTCAATTATTTT  
TAAGCGGCGGTGTTTTTCGAGGTGAAAGCCACAAATGGT  
GAGCACGCACTTGCTGATATAAGGAACCGTTATGGAATAG  
AACAGGGCTCTCTGTCCCAAAGATGCTATCCAAGCTGCG  
TTCACGGTGTGAGGAAGTGAAGCGAGTACTGTCACACTCG  
ACAGTGGGGGAAATTGCACTCGACGGGCTGCTTCCCGACG  
GCGAAGAATACGTGCTCAAGCTAACGCGAGCGAGGTTGGA  
AGAGCTATGCACGAAAATTTTTGCTCGCTGTTTGAGTGTG  
GTACAGAGGGCGTTGAAGGACGCTTCAATGAAGGTTGAGG  
ATATTGAGGATGTTGTGCTTGTTCGGGGGAAGTTCTCGGAT  
TCCTGCTGTGCAGGCTCAGTTAAGGGAGCTATTCAGAGGT  
AAGCAACTCTGCAGCAGTGTGCACCCTGACGAGGCAGTGG  
CGTATGGGGCTGCATGGCAGGCGCACGTAATTTCCGGTGG  
ATATGGGGAGAGCTCTAGGACAGCAGGTATAGTGCTTCTG  
GATGTTGTGCCCTTTCAATCGGCGTTGAAGTGGACGACG  
GTAAGTTTGATGTGATAATTCGTCGGAACACAACCATTC  
ATACCTTGCGACCAAGGAGTACAGCACTGTGGATGACAAT  
CAGAGTGAAGTGGAGATACAGGTTTTTCGAAGGTGAGCGCC  
CCCTCACGCGTCAACAACCACAGGCTAGGCTCCTTTGTTCT  
TGACGGTATTACCCCGCAAAGCACGGTGAACCGACTATC

ACCGTTACTTTTAGTGTTGACGCCGACGGGATCCTGACCG  
TTACAGCCGCAGAAGAAGCTCGGGAGCGTAACAAAAACACT  
TGTTGTGGAGAACTCAGAGCGACTTACCAGTGAGGAAGTA  
CAGAAGATGATTGAAGTTGCACAAAAGTTTGCCTTAACGG  
ACGCCACCGCTCTGGCGAGGATGGAGGCCACCGAGAGGCT  
CACGCAGTGGTTTGACCGACTCGAAGCTGTAATGGAGACC  
GTCCCGCAACCATACTCAGAGAAGCTTCAAAGCGTATTG  
CCTTTCTTCCGCACGGGAAAGAGTGGGTCCGGCACACAGCT  
TCATACGTACACTGACGCGGCGTCGATAGAGGCGAAAGTA  
GCGAAGATTGAACGGCTTGCAAAGAGGGCCCTGAAATCGG  
CGCGTCGTGAAGGAAAGGATGGATGGGCACCGGGCAATGA  
GGACAATGGAAGCGGTGATGACAACGACGGTGACGATAAC  
AGTGATGAGGAGGACGAGCTCCAAAGGGGGAGGGGCGTGA  
CAGAGGGATCGGGGAGGTCCCCGATAAGGAAACGCGACCG  
CATAGAGGCTATCAACGCAAACACAGAGTAA

M36124 223-657 T.BRUCI RIBOSOMAL PROTEIN S14 (RPS14)  
GENE, COMPLETE CDS. CODING

ATGTCCAAGAAACAAGAGGTGAAGTACTACGGCTCCAGCG  
CGGGGAAGGACCAGCTGGTTTATGGCGTTGTGCACATCTA  
TGCATCCTTCAACGACACCTTCGTTTCATGTCACTGACATG  
TCTGGTTCGTGAAACATTCTGCAAGGTGACGGGAGGTATGA  
AGGTAAGAGCAGATCGCGATGAAAGCTCACCATACGCTGC  
GATGATGGCTGCTCAGGATGTTGTTGCCCGTTGCAAGGAG  
TGCGGCATTAACGCTCTGCACGTGAAGATGCGCGCCACTG  
GTGGTGTGGCACTAAAAGCCCCGGGCCTGGCGCTCAGGC  
CGCCCTCCGTGCACTCGCCCGTGCAGGCATGAAGATTGGC  
CGCATTGAAGACGTACACCCGGTGCCAACGGACTCCACTC  
GCCGCAAAGGTTCCCGTCGTGGCCGCGCTTGTAG

M60653.1 708-2024 T.brucei posphoprotein gene, complete cds. putative

Coding ATGCGTCGCTTATTGTGTCTCTCACGCACTCGTGTTCCT  
TCATGAGGTGGAAGTTCGACGAAGTGGCACATCTTCGGGA  
CCAGGTTAAGGCCTTGGACAACCGCATTGCATTCATTGAG  
GAGAGTCAGACCATCAAATCACTTCTTGCTTTCTACAGCT  
CCCGCCCACTGAGTAATATAAACACACCAAGCAAGTTCAT  
CAGCTATTATGCTGAGTCTGATCACAATGCCAAGGTTTTT  
TGTCATGCAGAACTACCAACGCTACTAGCAAGACTCATCA  
CAACAATAGACTCGTTCCTCGTGCAGGTCTTAACGCGATGCT  
GCCCATCGTGTGCGGTGAGGAACACTTTTCTCGATTCCCTT

AAAAAGCTTATAAAGTGTGATTTCCCCGAAGATGGTGCGA  
AGAGTGAGCAGTTTCTGGATGTTGTCAAGGAAATCGAGGA  
GGCTCATATGAAGAGGGAAGTGTTGCTTACAATAGGCACC  
GGTCTTTTGCAGTTGAAGGATCTTCTTTTCGTGTCATAAGC  
GCTTTATTCTACGAAACAAGTGGTCTGGTTCATACAAAGA  
AATGGAGGCATCATCCAATGACTGGCTGTTGGATCTCACA  
GGGCCACTGGATGACTTCTGTTTCCGTATGGTGAAC TACA  
ATTTCTCTCACGAATGCTGTTGAACTCAGAAGTTGTGAA  
GAATAACATGGTTGATCTGGTTGATCTGCAAATAGATCTC  
GAGAAGGTTGTTTCGCAATGCTGGTAGAGGATGCTCAATCT  
ATCTGCACCAATTTTTACGGCTCCTGCCGGGGGTGAAGTT  
TATTATTTTGAAGGATGAAAACCAATGAAGTTGGCGTAC  
CTGAGTTCAACTATATCGTACGTTGTTATCGAGTTAATGA  
AGAATGCGTTCAGGGCAACTGTGCAATCGCATT CAGACCT  
TACATCACCCACCATTGATTGTGATGACGCACCTCAGGTG  
GAAGTTTTAGTGAATATAAAGAGGGCTCCAGTCACGAAT  
GTATACGTATTT CAGATGAGGGTCTCTGGGATGACGGTAG  
CACAGGCGAAAATGGCGATGAGCTATGCTCATCACGTCAG  
CAAAGTGCCTCATTGGCTCCCACCTTGGACAAGAGGACG  
GTGGCGACAACGTAGGCGTGGCTGGTTACGGTTTTCGGTCT  
TCCCATGTCGAGAGTTTATGCCCGGCACTTTTTTTGGAGAT  
CTTCTACTGAACACACGATGGAGGGGTACGGGACCAGTGT  
CTATTATTTTATCCAAATTTGAGGGAATCTTATTAGGTTT  
TGATCGATACCCGAGCACTATTTTGATGTTTAGTTAA

M73769 M37894.1 388-3423 T.brucei P-type ATPase gene, complete cds.

Coding ATGCTACCCGAGAACCTTCCAAC T GACCCCGCGGCGATGA  
CACCTGCGGCGGTGGCGGCTGCGTTGCGTGTAGATACGAA  
GGTTGGACTGAGTTCCAACGAGGTGGAGGAACGTCGCCAA  
GCGTTTGGAATAAACGAACTGCCAAGTGAACCACCAACAC  
CATTTTGGAAGCTAGTGCTGGCCCAGTTTGAAGATACGCT  
CGTCCGTATTCTTCTGTTGGCCGCGACAGTAAGTTTTGCC  
ATGGCCGTTGTGGAGAATAACGCCG CAGACTTTGTAGAGC  
CGTTCATCATTTTACTCATTCTCATTCTCAATGCTACCGT  
TGGGGTTTGGCAGGAGAACCGTGCGGAGGGGGCTATTGAA  
GCGCTCAAATCATTTGTGCCTAAAACCGCCGTTGTTCTTC  
GTGATGGAGACATCAAAACCGTTAATGCGGAGGAGTTGGT  
TCCAGGCGATGTCGTTGAGGTTGCTGTTGGCAATCGAGTC  
CCTGCAGATATGCGTGTGTGGAGTTACATAGCACGACAC

TCCGTGCTGATCAATCTATTCTTAATGGTGAGTCCGTGGA  
GGCGATGAAACAAATCGAAGCAGTGAAAGGACGACAGGAG  
CGGTTTCCAGCTTGTATGGTTTACAGCGGTACTGCTATCG  
TTTACGGCAAAGCGCTATGTGTAGTCGTTTCGCACTGGTGC  
CTCGACAGAGATCGGAACGATTGAGCGCGACGTGCGTGAG  
CAGGAGGAAGTAAAGACACCACTCCAGGTAAACTGGATG  
AGTTTGGTGTGCTCTTGTTCGAAGGTCATTGGGTATATTTG  
TCTTGTGTGTTTCGCCGTTAACCTGGTGCGCTGGTACGCA  
ACCCATAAACCCACAAAGAATGAGACGTTTTTTCACGCGGT  
ACATTCAGCCTAGTGTGCACTGCCTCAAAGTTGCCGTTGC  
ACTTGCGGTTGCGGCTATTCGAGGGTCTTCCCGCGGTT  
GTGACAACCTTGCTTGGCACTGGGGACTCGACGGATGGCGC  
AGCACAATGCCTTGGTACGGGATCTTCCAAGCGTAGAGAC  
ACTGGGTGCTGCACTGTCATTTGCTCGGATAAAACGGGA  
ACACTTACAACGAACATGATGTCTGTTTTGCATGCCTTTA  
CTCTTAAGGGGGACGGGAGCATCAAGGAATATGAGTTGAA  
AGACTCCAGGTTTAAACATTGTGTCAAACCTCTGTGACATGC  
GAAGGAAGACAAGTGAGTTCACCGCTGGAGCAAGATGGTG  
CCCTCACCAAGCTTGCGAACATCGCTGTGCTTTGCAACGA  
TGCATCCCTGCACCACAACGCAGCCACAGTTCAGGTTGAG  
AAGATTGGCGAAGCGACTGAGGCAGCCCTTTTGGTAATGA  
GTGAGAAATTCGCAAATATAAAAGGTGACTCTGCGGTAAA  
CGCCTTCCGTACACTTTGCGAGGGGAAATGGAAAAAGAAT  
GCCACATTGGAGTTCACGCGCAAGCGTAAGTCGATGAGTG  
TGCACGTCACAAGCACAGTAACGGGATCACCGGCCTCAAG  
CACAAACAATCTTTTTGTGAAGGGAGCACCGGAAGAGGTC  
TTGCGTCGTTCCACACACGTCATGCAGGACAATGGTGCCG  
TTGTACAACCTCAGTGCCACACACCGGAAGCGCATTATAGA  
ACAATTGGACAAAATATCAGGTGGTGCCAACGCTCTTCGT  
TGCATTGGATTTGCCTTTAAACCGACAAAGGCAGTTCAGC  
ACGTGCGCCTGAACGATCCTGCAACTTTCGAGGATGTCGA  
ATCTGACCTTACATTTGTTGGTGCATGCGGTATGCTTGAC  
CCGCCACGTGAGGAAGTGCGCGATGCTATCGTGAAGTGCC  
GCACCGCGGGCATCCGTGTTGTGTCATCACTGGAGACCG  
CAAGGAGACGGCGGAAGCGATTTGCTGCAAACCTGGGACTA  
TTGTCTTCTACAGCGGACCACTGGGCTGAGTTATACGG  
GACAAGAGCTCGATGCAATGACACCGGCGCAGAAACGTGA  
AGCAGTATTGACAGCCGTACTTTTCAGTCGCACGGATCCA



TCCCACAAGATGCAGCTTGTGCAACTACTGAAGGATGAGC  
GACTCATTTGCGCTATGACAGGTGATGGTGTAAATGACGC  
TCCGGCACTCAAAAAGGCAGATATTGGTATTGCCATGGGA  
AGTGGAACCGAGGTGGCGAAATCAGCGAGTAAAATGGTCC  
TTGCGGACGACAACCTTTGCCACCGTTGTCAAAGCGGTGCA  
AGAAGGACGAGCCATCTACAACAACACAAAACAGTTCATC  
CGGTACCTTATCAGCAGTAACATTGGTGAGGTTGTGTGCA  
TCCTTGTAACAGGCCTCTTCGGTTTACCTGAGGCGCTCTC  
ACCAGTGCAACTCCTGTGGGTAAATCTCGTTACAGATGGT  
CTTCCCGCAACTGCCCTTGGCTTCAATGCTCCAGACCGCG  
ACATCATGGAGCAGAGGCCGCGCCGCATGGAAGAGCCGAT  
TGTGAACGGCTGGTTGTTTATGCGCTACATGGTTATTGGT  
GTATACGTTGGACTGGCTACAGTCGGTGGGTTCCCTTTGGT  
GGTTCCTGCGACATGGCTTCAGCTGGCATGACTTAACCAC  
GTACACGGCATGCAGTGACATGACGAACGGCACTTGCTTG  
CTTCTTGCTAACCCGCGAGACGGCGAGAGCCATCGCCCTCT  
CCATTCTCGTTCGTGGTTGAGATGTTGAACGCACTGAATGC  
ACTGAGCGAAAATGCGTCGCTCATCGTGTCCCGACCAAGC  
AGCAATGTGTGGCTTCTTTTCGCTATTTTTTTCATCTCTTT  
CTCTGCACCTAATCATAATGTACGTGCCGTTCTTCGCCAA  
GCTGTTCAACATTGTGCCACTCGGAGTAGATCCGCATGTT  
GTGCAACAGGCACAGCCGTGGAGTATTCTCACCCCAACAA  
ACTTTGATGACTGGAAGGCGGTGATTGTGTTTAGCGTACC  
AGTCATCTTTCTTGATGAATTGCTGAAGTTTATTACGCGG  
CGTATGGAGAAGGCCAGGAAAAGAAGAAGGACTAG

M74167.1 413-1453 Trypanosoma brucei protein phosphatase 1 catalytic subunit mRNA, Coding

ATGAACTGTGACGAAATCATAAAGAACTCTTGCTCAATC  
CGGTACACAACACTGCTGCTACGGCGGGCCCTGCCAGTGA  
GAACTGCGAGAGCAAGCAACGAACGTACACTCGCATCTCA  
CGCCTTGCCGCGTTCAGAGCGCCAGACACAAGAAAGCA  
CTCCTAAAACCAATGGAACCGGACGGGCAACGACAGAGGG  
GTAAACGGAGGCTGAGGTGCGGTGGTTAGTGATGGAGTCC  
CGGGCGCTGTCCATGTCGCAGCCGATGCTAGTAGAAATTG  
CCGCCCCCGTGAGAATTTGCGGGGATGTGCACGGACAGTA  
CACCGACCTCCTGAGACTCTTCGACTTGGGAGGCTTCCCT  
CCAGATGCAAATTACATTTTTCTCGGGGACTATGTAGACC  
GTGGCGACCAGTCATTGGAAACAATCTGTCTCTTGCTCGC

ATATAAGTTGAGCTTCCCTGAGACCTTCTTCCTCCTACGT  
GGCAACCACGAGTGTAGTAGCATCAACCGTATATACGGTT  
TCTTCGATGAGTGCAAGAGGCGGTATAGTGTCCGCTTGTG  
GAAACAGTTCACCGATACTTTCAACTGCATGCCAGTGGCT  
GGATTAGTTGAAGGACGTATCCTCTGTATGCATGGTGGGC  
TCAGTCCTGAACTCACTGATCTCGATCAGATACGTTCGCAT  
TTCTCGCCCCACGGACGTGCCCGATAGTGGACTGATATGC  
GATTTGTTATGGTCTGATCCCAGCACGAATATGGAGAGTA  
ACTGGAGTGAGAATGACCGCGGCGTGTCTGGACCTTTAG  
TGAGAGTGTCGTGAAGTCTTTCAATAAGAAGTTTGACCTC  
GACCTCATTGCGGTGCGCACCAGGTGGTGGACGCGGGTT  
ATGAATTCTTCGCAGCACGGCAGCTTGTGACAGTTTTCTC  
TGCGCCGAACACTACTGCGATGAGTTTGACAACGCCGGTGCA  
TTTATGTGTGTGGATGAAAATCTGATGTGTAGCTTCGTAC  
AGATTGAACCAACACGTACGCTGCTGAGGTACTTCTTTTA  
G

U06644.2 1471-2127 *Trypanosoma brucei* 427-60 calflagin gene, complete cds. Coding

ATGGGTTGCTCTGCATCGAAGGATACAACGAACTCCAAGG  
ATGGTGCCGCCAGTAAGGGTGGAAAGGACGGGAAAACCTAC  
TGCGGACCGGAAGGTTGCGTGGGAGCGTATTCGGTGTGCG  
ATTCCCCGTGACAAGGATGCTGAGTCGAAAAGCCGTTCGCA  
TTGAACTCTTCAAGCAGTTTGACACGAATGGGACTGGAAA  
ACTCGGCTTCAGGGAGGTGCTTGATGGTTGCTACGGTATA  
CTCAAGTTGGATGAGTTCACGACTCACCTTCCTGACATTG  
TCCAGCGTGCGTTTGACAAAAGCGAAGGACCTCGGCAACAA  
GGTAAAGGGTGTGGGTGAAGAGGATCTTGTGGAGTTCCTT  
GAATTCCGCCTGATGCTTTGCTACATCTATGATATCTTTG  
AGTTGACTGTAATGTTTCGACACCATGGATAAGGATGGAAG  
TTTGTTGCTTGAGTTACAGGAGTTCAAGGAAGCCTTGCCG  
AAATTGAAGGAGTGGGGTGTGATATCACTGACGCTACCA  
CTGTGTTTAATGAGATCGACACTAATGGATCTGGTGTGTG  
GACATTTCGATGAATTCTCATGCTGGGCTGTCACTAAAAAG  
TTGCAGGTATGTGGCGATCCTGATGGTGAGGAGAACGGAG  
CAAATGAAGGTAATTGA

U10562 55-1404 *TRYPANOSOMA BRUCEI* ELONGATION FACTOR-1  
ALPHA MRNA, COMPLETE CDS. CODING

ATGGGAAAGGAAAAGGTGCACATGAATCTTGTGGTGGTGG

GCCACGTGATGCCGGTAAATCCACTGCAACGGGTCACTT  
GATCTACAAGTGCGGTGGTATTGACAAACGTACGATCGAG  
AAGTTCGAGAAAGAAGCTGCCGACATTGGTAAGGCCTCAT  
TCAAGTACGCATGGGTGCTGGACAAGCTGAAGGCTGAGCG  
CGAACGTGGTATCACGATCGACATTGCACTGTGGAAATTC  
GAGTCACCCAAGTCTGTCTTCACTATTATTGATGCTCCTG  
GGCACCGTGACTTCATCAAGAACATGATCACCGGCACATC  
GCAAGCCGACGCAGCCATCCTCATCATTGCCTCTGCGCAG  
GGTGAGTTCGAGGCTGGTATCTCCAAGGATGGACAGACCC  
GCGAGCACGCGTTGCTGGCCTTCACTTTGGGTGTGAAGCA  
GATGGTTGTGTGCTGCAACAAAATGGACGACAAGACTGTG  
AACTACGGACAGGAGCGGTATGACGAGATTGTGAAGGAGG  
TGTCTGCTTACATCAAGAAGGTTGGGTACAACGTGGAGAA  
GGTGCGCTTCGTCCCCATCTCCGGATGGCAGGGCGACAAC  
ATGATTGAGAAATCCGAGAAGATGCCATGGTACAAGGGTC  
CAACGCTCCTGGAGGCACTAGACATGCTGGAGCCACCAGT  
GCGTCCGAGCGACAAGCCCCTGCGTCTGCCACTGCAGACG  
TGTACAAAGATCGGTGGTATTGGCACCGTGCCCGTTGGTC  
GTGTGGAGACCGGCGTGATGAAGCCTGGTGATGTGGTGAC  
GTTTGCCCCCGCCAACGTGACGACCGAGGTGAAATCGATC  
GAGATGCACCACGAGCAGCTCGCTGAGGGCGACCCCCGGTG  
ACAACGTGCGCTTTAACGTGAAGAACGTTTCTGTAAAGGA  
CATCCGCCGTGGCAACGTCTGCGGTAACACCAAGAACGAC  
CCCCCAAAGGAGGCCGCCGACTTCACGGCACAGGTGATCA  
TCCTGAACCACCCCGGACAGATTGGAAACGGTTATGCGCC  
CGTGCTGGACTGCCACACATCGCACATTGCCTGCAAGTTC  
GCGGAGATCGAGTCGAAGATCGACCGTCGCTCTGGCAAGG  
AGCTGGAGAAGGCTCCCAAGTCGATCAAGTCTGGCGACGC  
CGCGATCGTGCGCATGGTGCCGCAGAAGCCTATGTGCGTG  
GAGGTCTTCAACGACTACGCGCCACTCGGCCGCTTTGCCG  
TGCGTGACATGCGCCAGACCGTCGCTGTCGGTATCATCAA  
GGCCGTGACCAAGAAGGACGGTTCTGGTGGTAAGGTGACG  
AAGGCTGCGGTGAAGGCTTCGAAGAAATAA

U20092 294-1406 ADOMETDC CODING

ATGTCCTCTTGCAAGGACTCTCTTTGCTCATGGCGATGT  
GGGGTTCCATCGCTCGTTTTGACCCAAAGCACGAGCGAAG  
CTTCGAAGGGCCTGAGAAGCGCTTGGAGGTGATAATGCGG  
GTGGTGGACGGGACGCACGTTAGTGGTTTACTTGCACACG

ATGACGATGTGTGGCAAAAAGTTATTGATGCTATATGTGC  
ACACATTGTTTCTCGTGAGTTTAATGAATACATTTCGCTCC  
TACGTGTTATCGGAGAGCTCATTGTTTGTAATGAAAGATC  
GCGTGATTCTCATAACTTGTGGTACCATCACTCTTTTGAA  
TTGCGTGCCGCTCATATGCGAGGCGGTGAGTACTGTTTGC  
GGCGAAGTAGAATGGGTTTCCTTCATGCACAAAACTACA  
GTTTCCCGTGGGAGCAGAAGGGACCGCATCTTTTCGATGGC  
GGAAGAATTTAAGACACTTAGGTCCCATTTTCCGTCCGGA  
CAACCATTCATATTTGGTCCGATTGACAGCGACCACTACT  
TCTTGTATTTGGACAGTGATGTTGTTCAACCCAGCTGCAG  
TGACGATGCACAACTCAGCATGACCATGTATGGGCTTGAT  
CGCAATCAAACGAAACACTGGTACTCGGATAAGATGTTGC  
CTACGGGTCCTGAAACCGCAGTGATACGGGAGGCAACGGG  
GCTCAGTGAAGTTGTAGATGATTCATGGATCCTTCACGAC  
CTTCAGTATGAGCCATGTGGCTACAGCATAAATGCGATAC  
GTGGTAGCGAGTATCAAACGATACACATAACACCTGAGGA  
GCACTGTTTCGTTTGCATCATATGAGACGAATACGTGTGCT  
CTTAATTACTCGAAGTGTATCTGTGGAGTATTGAGAGTGT  
TCGACCCTGAACGGTTTTCTGTGATTGTATTTATTGACCC  
TGATAGTGCTGTGGGGAAGTCTTACCATAGTGGGGGAACG  
ATTGGTGTGGAACCCGAGTATTATCCGAACCTATGAAGCGC  
ATCACCGTACAGTGAACGAGTATACACCGGGTCACTGGGT  
TCTGAAGGTAAACTATGTAAAACGTGCGGTTGGCACTGTA  
GGGACTTCCGCAGCTTCTGGAGCGAAGGAATGA  
U20781 170-1753 TRYPANOSOMA BRUCEI DIHYDROFOLATE  
REDUCTASE-THYMIDYLATE SYNTHASE CODING  
ATGCTCAGTCTTACGCGTATCCTCCGCAAGAAAATTCCTG  
TTCATGAGTTGGCGGGGAAAATTTCCCGCCCTCCCCTGCG  
ACCCTTCTCTGTTGTTGTAGCGTCGGACGAGAAGGGTGGG  
ATTGGGACGGTGGTACGATCCCCTGGGAAATACCTGAGG  
ACATGCAATACTTCAGAAGGGTAACGACAAACCTTCGGGG  
GAAAAATGTAAAGCCATCGCCAAGTAAACGGAATGCTGTT  
GTGATGGGGCGGAAAACATGGGACAGTCTTCCACCAAAGT  
TCCGTCCACTGTCTAACCGCCTTAATGTTGTGCTGTCACG  
AAGTGCGACAAAGGAACAGTTGTTGGCTGGTATCCCTGAT  
CCCATCAAACGAGCGGAGGCTGCGAATGATGTGGTTGCTG  
TGAACGGTGGGCTTGAAGACGCACTTCCGATGTTGGTAAG  
TAAGGAGCACACATCTTCTATCGAAACGGTGTTTTGCATT

GGTGGCGGGACTATATATAAACAAGCCCTTTGTGCCCCAT  
GCGTTAATGTGTTGCAAGCTATCCACCGGACGGTGGTCCG  
ACCAGCCTCAAATTCGTGTAGCGTTTTCTTTGACATCCCA  
GCCGCAGGGACAAAGACCCCGGAAGGACTTGAGTTGGTGC  
GGGAAAGCATAACGGACGAACGGGTATCAACCGGAGCTGG  
CGGAAAGAAATATCAGTTTGAGAAGCTTGTCCCCCGAAAC  
AGCGAAGAGGAGCAGTATTTAAATCTCGTTGGCCGCATAA  
TTGATGAGGGATGTACGAAATGTGACCGCACGGGTGTTGG  
TACCCGCTCCCTCTTTGGGGCCAGATGCGTTTCTCTCTC  
CGCAACAATCGCCTGCCGTTACTAACCACGAAGCGTGTCT  
TTTGGCGTGGAGTATGTGAAGAGCTGTTGTGGTTTTCTTCG  
GGGAGAAACAAATGCAAAGTTGCTGAGCGACAAGGGGATT  
CACATATGGGATGGGAATGGCTCACGAGCATTCTTTGACA  
GTCGTGGCTTGACTGATTATGATGAGATGGACCTCGGACC  
TGTTTATGGCTTCCAGTGGAGGCATTTTGGTGCCGACTAC  
ATTTCTTGCAAAGTGGATTCCGAGGGGAAGGGTGTGATC  
AGATTGCAAACATTGTGAAGTCATTGATAGAGAATCCGGA  
TGACCGTTCGCATGATTTGTACAGCTTGGAATCCGGCCGCC  
TTGCCACGCATGGCGCTCCCACCATGCCACATGATGGCGC  
AATTCTACGTGAGCAATGGGGAACTCTCATGCATGTTGTA  
CCAGCGGTCATGTGATATGGGTCTTGGCGTCCCCTTCAAT  
ATTGCTTCGTATGCACTGCTTACATTCTCATGGCAAAG  
CTTCTGGACTTCGGCCGGGCGAATTGGTGCACACCCTTGG  
CGATGCACATGTTTACAGTAACCATGTGGAGCCGTGTCCG  
AAGCAATTGAAACGCGTGCCCCGCCCTTCCCTTTCATCG  
TGTTCAAACAAGACAAAGAGTTCCTGGAAGACTTTCAGGA  
AAGCGATATAGAGGTCATCGATTATTCTCCGTACCCCGTA  
ATTTCTATGGAGATGGCGGTGTAG  
U22048 528-1835 TRYPANOSOMA BRUCEI PUTATIVE RNA BINDING  
PROTEIN TBRRM1 GENE, CODING  
ATGCAACAATATAACCCTTCGGGTGGCTGGACTTGCCGACG  
GAACCGCCGACGACGCGGTTTCGTGAATTTTTTACCCGCTT  
TGGTGAAGTGACGGAATGCGTCGTCGCTGGGACGGAGGCG  
ACAGTTTCTTACAAGAACCAAGACGATTACGCGGAAGCTC  
TAAGAATGGATGGTTGTGAATTCGATGTTGGAGTAACACT  
GAAAGTGGAGGCCGTGGAAAAGACGACGGAGGATGTTCCG  
CAGGCAGACGGCGCGGGGGCGGGTTCTGCTGAGGATGCCG  
CGGGAGAGGTCTCCAATGGGGCAAATCGTGATGGCCTGTC

GGATACGGGAAATACAGAGGAAAGCAATAAGCAGAAACGC  
TTTCGTGACGACTACAAGGTTGCTGTACGTCACCTTCCTG  
ATGACGCAACGGAACAGCAACTACGGAATATGTTTCAAAG  
CGCAGGTACTATTTTGGATTTCTTTCTGGAACCCCGTCGT  
CGCTACGCCTTTGTTGGGTTTGACAGCCGCGAAGCTGTTG  
AAGCTGCTCTAAAAATGACCGGCACAGAACTCAACGGCAC  
CATCATTAAATGTCGAGCTCAAGCGGACAGTGAGTCGGGAG  
AGTCAACTGGAGATGAAGGTCGTCGTCAAGAACCTTCCAC  
CAGATGTAACAGAGAACTCTATTCGCAATTTTTTTCGCGGC  
AGTTGGCGAGCCGGTGGATATTTTTATTTCATGAAAGGAAG  
ATGTTGCGCCTTTGTTGGTTTCGCAGACGAAAGTGCCCTGTG  
CGGCTGCCATTCAGATGGACGGTACGGAGATGGATGGGCA  
CCGTGTGCAGATTGAGAGGCGTCAGCGACAACGGTGCTTC  
AAATGTAATAAAGAGGGTACGTTGCCACTCAGTGCCGTG  
GTGAGCCAACCTGCCGCACCTGCGGTCGTCCGGGTCACAT  
GGCGAGGGATTGTCGCATGCAGCCCGGCTCGTACGACCGC  
AACCGTGGGGGTAATATGGGCGCAATGGGACGTATGGGAC  
ATGCACCTCCTGGTGGTTATTACATGGGTCCTATGGGTGG  
TGACAGACGAGGGGATGTTGGCAGAAGGCCTCCTTACAAT  
GACCGTCGTGTGGGTGGTGAATACGACAGGCGGCGGCCCC  
GTTCCCGGTCCCGCTCACCTCGTACGAACGCCGGCACCG  
ACGCCGCAGCCGCAGCCGCAGTCGCAGTCGAACTCGCAGC  
CGCAGTCCCAAGCGATTACACGGGAGCGGGAACGGGGCC  
GTGACCGAAGTCGCAGTCCATCACGCCGAAGGTACCCGCG  
TGAGGGGGAGCGGCCCCGGCGTGCGTGA

U24677.1 43-639 *Trypanosoma brucei rhodesiense* ras-related protein  
RAB-4 mRNA, Coding

ATGTCAGAGAGATATCAACAGTTAATGAAGTTAATTGTTG  
TTGGAGATAGCGGCACAGGTAAATCGTCTCTTTTACACCG  
CTTTGTTGAGGACACATTTTCAGAGGAACGAGCGCAAACCT  
ATTGGTGTTGAGTTTGGATCAAAGATTATTGAGTTATCAG  
GACGTAGGATCAAATTACAAATATGGGATACAGCCGGTCA  
AGAAAGATACAAATCAGTTACAAGAAGTTATTACAGGGGA  
GCAGTTGGCTGCCTCATTGTGTATGACATTACAGAACGCA  
CCTCCTATGAAAGTGTTCCACAGTGGCTGAACGACGTTTCG  
GCAACTTGCAGGACCGGATGTAGTTGTCATGCTGATTGGA  
AACAAAGAGTGACATGTCAAAAAATAGAGCCGTTCAACATA  
ACGAGGCTTCTTTGTTTGCCCTAGAGAACAACACTACTCCA

TTTTGAGACGTCTGCTTCCACCGGCGAGTTTGTGACTGAT  
GCTTTTTTTAAAAGTAGCCAAAACCTGGTTTGAGTTTGGGCA  
CCGATGACAACGACGGGGAAAATGGGCATGCAGAACTTT  
GTATGATGGTCCGAAACGGTTTTTCGTGTGCTTGTTAG

U24678 210-902 TRYPANOSOMA BRUCEI RHODESIENSE  
RAS-RELATED PROTEIN RAB-5 MRNA, CODING

ATGTCGGTGTGTCAGCGACACCATACAAACGACAGGATGCAA  
TAACCGCCAGAACTGTTTTGCTCGGGGAGAGTGCAGTAGG  
AAAGAGTTCCATTGCTCTACGGTTTGCGCGCAACGAGTTC  
TCCTCGAACCAAGAAACCACTATTGGCGCCGCCTTCCTCT  
CGCGAAGCGTTACGGTATCGGCAACTTTACAATCCGGTGG  
CGGGGGCGCAGTAGCAAATGCCGCTAGTGGGACAATCAA  
TTCGAAATATGGGATACAGCAGGGCAGGAGCGCTACCGCT  
CTCTCGCCCCCATCTACTACCGTGGAGCGTGTGGCGCACT  
TGTGGTGTACGATATAACGAGCGCAGAGAGTCTTAAAAA  
GCGCAAATGTGGATGCGAGAGTTGCGAGCCAATGCAGACC  
CAACTCTTCTCATCATCTTGGTGGGAAATAAGAAGGACAT  
GGAGTCTTTGCGACAGGTGTCGTACGAGGACGGTGCAGCA  
GTGGCTCAAGAGGAGGATGTCAACGGTTTCTTTGAGGTCT  
CTGCCAAAGAAAACGTGAACGTGGAAGAGGTTTTTGCAA  
ACTTGCGCGGCTTCTTCTTGAGCACGGTTTGGGTGCAAAT  
TCAGGTCCTGGCTCTTTGTCTGGACCTCGTGGTGCGCAAC  
GTCTGGAGCCCCCGACGCGTCAACAGAAAAAGGAAGGCGG  
GTGTGCCTGCTGA

U26666 93-692 TRYPANOSOMA BRUCEI RHODESIENSE ALKYL  
HYDROPEROXIDE CODING

ATGTCCTGCGGTGATGCGAAACTCAACCACCCTGCGCCTC  
ACTTCAATGAGGTGGCGCTGATGCCTAATGGCACTTTCAA  
GAAAGTTGATCTCGCCTCTTACAGGGGAAAGTGGGTGGTA  
CTATTCTTTTATCCTCTCGACTTCACGTTTGTGTGCCCA  
CTGAAATCTGCCAATTCTCTGACCGCGTGAAGGAGTTCAA  
CGACGTCGATTGTGAGGTTATTGCATGCTCAATGGACAGC  
GAATTCTCACATCTTGCATGGACGAATGTTGAACGCAAGA  
AGGGTGGATTGGGGACGATGAACATTCCCATCCTCGCTGA  
TAAAACGAAATCAATCATGAAGGCTTATGGTGTACTTAAG  
GAGGAAGACGGTGTTCATACCGCGGTCTTTTCATCATTG  
ACCCCAACAGAACCTTCGTCAAATTACCATCAACGATCT  
TCCAGTTGGTTCGTAATGTTGACGAAACACTTCGACTTGTG

AAGGCCTTCCAGTTTGTGGAAAAACACGGTGAGGTGTGCC  
CCGCTAACTGGAAACCTGGAAGCAAGACAATGAAGGCTGA  
TCCCAACGGATCCCAAGATTACTTCAGCAGCATGAACTAA  
U28866 105-998 TRYPANOSOMA BRUCEI REISKE IRON-SULFUR  
PROTEIN PRECURSOR GENE, CODING

ATGTTCCGCAGGTCCTGCATATCAGCTTCCCAACCCACGG  
CATTCCTTCGCGTATCGCTGGTCTTTAAGCAACTTGAAGG  
TTCCAACCCATTAAGTGTAAAGGACAGACCCGTGAATTCA  
TGGTCCGACGAATTTCTAAAACCACCCGTATCGAAAGAGA  
TGGCAGACAAGTACGGCCGATACGCCAAATACTCCGACCC  
AACGTTGTGTTTTCAGTGGATACCTCTTCTGAGGTTGTTCTC  
AACACATATCCGGAGGGATCTCGTGAGGGACGCATTGAGG  
CCACAGCCGGCGTTCGCTCTCAAGGATTACGACGCTTCCAT  
GTGGGACGAGGAGTTTTTCCGCAAGTACATATTGAAACCA  
AAGTTGCCTAATGAATTAGAGGACCGTGCGCGCGTCACAG  
ACTATGCGCTGAATTCTGCATTGTTGGGATTTGTTATTCT  
TATGGTGCGGTATGCCGTGTTGCCGCTGTGGTACGTTGGA  
CAGCCGGCCATGTCCATGGTTGGTCAAATGAACATTGAGG  
CTGAGGTGGGTGAGCTAGAGGACCGTGAATGCAAGACTGT  
AGTATGGCGGGGCAAACCCGTGTTTGTATTATCGCCGCTCA  
GAGCGCCAAATGAATGATGTGCTGGGGACTCCACTCAGTG  
CACTGAAGCATCCCGAAACGGACGAGGCCCGCTTCCCTGA  
CCATCGTGAAATGGCTGTTGTCATCGCTATTTGCACTCAT  
CTCGGGTGCATTTCCATTCCTAACGAGGGTCTCTTTGGTG  
GCTTCTTCTGTCCGTGTCACGGCAGTCATTACGACGCTTC  
AGGTCGTATTTCGTCAAGGTCCCGCCCTCTTAACTTGGAG  
GTACCGCCGTACCGCTGGGTGGATGATAAGACGATATATT  
TGGGAAAACCTATAG

U29199 272-1978 HEL64 CODING

ATGGAGGAGACGTACAGTCCCTTTACGGGACGTCAAGGCC  
AGTACAATCAGGGCTACAATGGTGGAGGGCGACGAGATAG  
CCGCGGCGGTATGGGAGAAAGAATAAAACCCGTTGACTGG  
GGGAATGTTTCTCTCGTTCCCGGAAACTGGAAGGTTCTCG  
ATGGTAAGGCGATCAAAAAGGCAGGGGAGATAAAGACATC  
CACCCAGAAAGCGGGACAACCTCAGCGAGGAGGAGGCGACG  
AAATGGCGAGAAGAACATGTGATCACCATATTTGGTGATG  
ATTGTCTCCACCTATGTCATCGTTTGATCACCTGTGTGG  
AATCGTTCCACCATACTTCTAAAGAAGCTCACCGCCAG



AATTTCACTGCACCAACTCCCGTGCAAGCGCAGTCATGGC  
CCGTTCTTCTATCTGGTTCGTGACCTTGTGGGGGTTGCGAA  
GACAGGCTCCGGAAAGACGCTTGGCTTCATGGTCCCTGCC  
CTCGCCCACATTGCAGTGCAGGAACCCCTACGCTCCGGTG  
ACGGTCCAATGGTTGTTGTACTGGCTCCCACCCGCGAACT  
CGCTCAGCAGATTGAAGAAGAAACAAAAAAGGTTATCCCC  
GGGGACGTGTATTGCGGTTGCGTTTATGGAGGAGCACCAA  
AAGGACCCAGCTTGGGTTGCTGCGGAGAGGTGTGCACAT  
TCTCGTCGCCACACCAGGTCGTTTGTATAGACTTCTTGGAT  
ATTAAACGCATTA ACTTGCATCGTGTACCTATCTCGTTC  
TAGATGAAGCAGATCGCATGCTTGATATGGGATTTGAGCC  
GCAGGTTTCGAAAATATGCGGCCAGATAAGGCCAGACCGG  
CAGACAGTCATGTTCTCCGCCACTTGGCCACGTGAGATTC  
AGCGACTGGCAGCAGAATTTCAGAAGCAGTGGATACGCAT  
CAGTGTGGGCAGTACGGA ACTTCAGGCTAACAAGGACGTC  
ACTCAGCGTTTCATTCTCACACAAGAGTTTGCAAAGCAGG  
ACGAGTTGAGGAAGCTCATGCAAGA ACATCGGGAGGAACG  
CGTGCTGGTTTTCTGCAAGATGAAGCGGACTGCGGATGAG  
CTGGAGCGGCAACTAAGACGATGGGGCTACGATGCAATGG  
CTATTCATGGTGACAAGGAGCAGCGGCAGAGGGAGTTCAT  
CCTAGCGAGGTTCCGTAAAGATCCACGATTGTGCCTTGTC  
GCCACAGACGTTGCTGCTCGAGGTCTGGACATCAAACAAT  
TGAAACTGTTATAACTACGACTTCCCCATGCAGATCGA  
CGACTACGTACATCGTATTGGCCGCACAGGCCGTGCAGGC  
GGCGAAGGGAGATGCGTTTACCTTATCACGAAGAAGGAGG  
CTCAAATAACACCTTCAGTGTGGAAGGAACTTATTGGGAT  
CCTGGAGCGCGCACAACAGGAAATACCTGATTGGATGATC  
GAATGGAACGCGCAACAGCCGAGATACCAGGTGAAGCGGA  
ATCGCGGTATGAACGGGTTTGGAAAGACATCAAAGCGCTCC  
CTTCTGCGTAACGGTCACCGCCCATCGTTCTCAGCGAAC  
GGGAATTATAGTGCTCACGGAAATGGTACATTTGGCCTTG  
GAAAGCACAACGACGACGCTGTTCCCTTCTCGTCATCCGC  
TATTCAATACAAGCGATTTGACAGTGACGACGAGGCGGAA  
CCGTCCCGCAAGAAATACGCGAGATAG

U32987.1 28-951 *Trypanosoma brucei rhodesiense* ADP/ATP carrier  
mRNA, complete cds. Coding

ATGACGGATAAAAAGCGGGAACCGGCCCCCAA ACTTGGGT  
TCCTTGAGGAGTTTATGATTGGTGGTGTGCTGCGCTGCCGGTTT

ATCCAAGACGGCGGCTGCTCCAATCGAAAGAGTAAAACCTG  
CTCGTACAGAACCAGGGAGAGATGATGAAGCAAGGCCGAC  
TGGACAAGCCATACAACGGTGTCTGTTGACTGCTTTCGGCG  
CACCATCAGCACGGAGGGCGTGTATCCGCTTTGGCGAGGT  
AACCTGTCAAATGTTCTGCGTACTTCCCAACGCAGGCGC  
TGAATTTTCGCTTTAAGGATAAATTTAAGAGGATGTTCAA  
CTACAAAAGGAGAAGGATGGCTATGGCAAGTGGTTTATG  
GGTAACATGGCATCTGGTGGTCTCGCTGGTGTGCATCTC  
TTTGTTTTGTGTATTCCCTTGGACTACGTCCGTACCCGTCT  
CGCTAACGACACGAAGTCTGTGAAGGGTGGTGGGGAGCGC  
CAATTTAACGGTATTGTGGACTGCTATGTCAAGACATGGA  
AGAGTGATGGCATCGCTGGGTTGTATCGTGGCTTTGTGGT  
ATCCTGTATTGGTATTGTTGTGTACCGTGGTTTCTACTTT  
GGACTTTACGACACCCTTCAGCCAATGCTTCCTGTGGACA  
CATTCATCGTAAACTTCTTCCTTGGATGGGCTGTGACTAT  
TGTGGCGGGCCTTCTTTCTTACCCGTTGGACACCGTTCGC  
GGGCGCATGATGATGACATCAGGTGCTGCTGTGAAGTACA  
AGAACTCGATGGATTGTATGTTGCAGGTGATTAACAGGA  
GGGAGCTGCGTCCCTGATGCGAGGCGCAGGTGCAAACATC  
CTGCGCGGTATCGCTGGTGTGCTGGTGTACTTTCCGGCGTGG  
ATGCGCTGAAACCCATTTATGTGGAGTGGCGCAGATCGAA  
TTAG

U43702 146-1666 TRYPANOSOMA BRUCEI PUTATIVE NUCLEASE  
GENE, COMPLETE CDS. CODING

ATGCATCGCATCACCGTACGGCTCATGCCCACTGATACGT  
GCACTGTTCATCCCCTTACTCCTTCTATTACACTTTGTGG  
CATCAACTGCAGGAAGAAGCATAACGATGGCGGTTTCTGCT  
TCCTCCGTGGGACGTGCCTTTGCCTTCCTTGGTACGGCGC  
TGCGGGGAGGCGCGATAGGAATGGTTGTGGAGCGTGGTGG  
TTGGTTTGGTGTGGACAAATGCCATCCATCGCCTGTTCCG  
TATCAACAGATGACTGAGCGCACAAGTCCGGAGGTGTTAC  
ACGTGCAATGCCACAGCCCGCATAACCCCAAGGAGAGGTG  
TAACGACGATGGTGGGGAACTACTCCTTTTCGTGCTAAGA  
CTTACAAGCAAGGGGCTTCCGTCCGACGATCACCTGCGCT  
ACTACAAAGGCTTTGTTTCTAGTCTGAATTATGAGCGTCG  
TATCCCTAATTGGGTGTTGGAGTACATCCCCGGCACGACC  
ACTGCTGCTGATTCAGTGGTCACGGCTGATAACGACTTAG  
TAAACGCTTCCGCAGCGGAAGCCCAGCGAGATGGAATGAG

GTTCTTTGCGGACATGACGGTGCCTCAGTTGTTCCGCGTG  
CAGCCCGGTGACTATATTGGGGGTGGCAGGGGACAGGACT  
CACGAGGCCTCAGCCGAGGTCACCTTGCTGCCGCACAGTT  
TCACAAGAGCTCTACTGTTGAGTTGGCTCAGACCTTTAAC  
ATGAATGCGAACACTGTACCACAGGACATGACAATGAATG  
CTGTCGACTGGCTGCGGTTGGAAAACCTCACACGGAAGTT  
GCGGCGGTATTATGAGAGGGGATTGTGGGTAGTGACGGGA  
CCTGTCTTCCACCCGCGGCTCGTGGATGGTGTGTGCGCA  
CGTGGCGGTGGGCGGAACCATCGCAATGTCCGTCTCCAGT  
AAAACCTGTGAGTAGCGGAGTGTTGGCTTCTGGAGAACAC  
TGCCACTGTGGAAATGACAAGGCAGCAGTGCACTTGCGGA  
AGATTGTCTGCTATGAGCTTGTGGGCAAGCGCGACGTTGC  
GGTCCCCACACACCTCTTCAAAGTTATATTAGGTGAGCGA  
GCGGACGGGGCACATGAAGCTGCTGCCTTCCTAATGCCGA  
ACGAACCGATTGCCGTGGAGCGGCCCTCACAGCTTACCA  
GGTGCCGTGTGGTAGAAATCGAGCGGCTGACGGGTTTGGAG  
TTCTTTCGGAATGTGGCCGCTGCTGGGTGACACGCGCGGT  
TCTGGGGGCGGGAAGTGGATGCTCTGCCAAATATTTGCAG  
ACGCGTGGTGTGTGAAGCACGTACCGCAGGAATGTTTCGC  
TCGTACCGAGACGTGGCGCGTCTACGGGCGGCGGGTTCTC  
TTCCTGAATTGCAGAGTGTTTACAGCATCCTGCTTGCAGA  
ACAGCAGCAGAAGTGTGGCAACACAGCCGGAATAACAGTT  
GCTCTGGATGGGGTTGTAGCACAGGAATATAGAGAGCGCC  
TGAGGGAATAATGGCTGTGTGCGACCAACGACACCGGTTA  
A

U43717 85-1725 TRYPANOSOMA BRUCEI FLAGELLAR  
GLYCOPROTEIN GENE, COMPLETE CDS. CODING  
ATGGGTGTCAGGACTGAATCACGGGAAGCATTGGCCGCAC  
TCGTGGCAGCGTTGTTGCTGCTGCTGGGTTTTGTGAGTCC  
CGTTATAGGAGACCAAACCGTGGGCACCAAGGTGATTGTG  
AACCTCTTCAACAGTTGTATCAACTGTAGTAGTGGGCAGG  
CGGATGGCATAAACGGTACTGGTCGCTTATTCAAGGCGAT  
GGGTGGGTTCTTTAAGGACAAAAGCTTTCCTTTACTTTTA  
TGTGATGTTGGAGGTGGTGGGTCCACCGTGCGACTCGTAA  
ACAAAACCTGGCATATACACCGTTGCGGGAAATCTTGCAA  
GCGTGGTGACGAAGTTGGTTCTTTAGAGGTTGCTCGTTTT  
AATCATCCCACCTCTGTTGTTGGTGTAAACAATGATATAT  
ACGTTGCGGACAGGGATAATGACTGCATGAAACGGATAGA

TGCTGATGGAATGGTGACGAAGTTTGCGGCCAATGAAGTT  
GATAAACCGAGTAGTATTATTTATCATGAACAAGACGGGG  
CACCGGTTTTATTTATTTTCGGATACTGGAAATTCAAGGAT  
TATGTA CT CGCAGATAAGTGTGTCCAAACAATGTAACGGCG  
AAGCTTGTTGGAGGTTTTCAACCTGGTGTGATGCAAATAA  
GCAAGAAGCGGAATTTTCATGTATGTCGTGAAGGAGACCTC  
GTGGATTGCAGCGGTGGACCTGAATAGCCTCAGCGATTCCG  
GATGGTAACAAGAAGAGCTGGGACATCGCCAATATGAGTT  
GTCTCGATTATGTCGATGCCTTGATGT TAACTGAGGACGA  
AAATGAGCTCTATTATTACGGTGAACCTAACGGCGAGAGC  
CATATCATGTCCCTTGAATTGAATTCCTCTGAAACCGGTC  
TGTTGTGCCCTAAGAAGGTGATGGAGTGGATGCATGGAAG  
GTGAATGGATGTGAATATTATGCCATAACCGAAACAGCTG  
TGACGCCCGTCCGTGAGAAATGCTATTCACCAACACCACT  
ACCGCCGGTGACTCCACGCCAACGCCCGGGTCACCTCCG  
AGATCCACAGCTGTTGCCGCCTTTTCGCGCTTCCTCGTTCC  
CAATGGGAAATGATCGGCTCATGCACGCCCTGTATTCATG  
GATTATGAAAGATGTGGAGGTAGCCTTTTCGTACAGAGGAC  
TTCTATGCTGTGTTCCCTTCCACCCGGTGAGATTAACGTGC  
CTGGTGGTACAAATGTTTCGACGTGGACAAACCTTACTGC  
AATGATGAACCTTGAGAATACCATCCTTATTACCAACTAC  
AGGGGCCCCCCCCGGGATGAGCAAGGGACGTGCGCAGAAGC  
GGTTGTTCTCGTCTCCATGGACGTGGACCCGGATGTTCCCT  
TGAAGA ACTGTGCGCAGCAAGAGCAGTGGAGTCACCTGTTG  
CCGCTCTGCATGGTGAAGTGTGTGGATGATTGCCAGCACA  
TTACCTTAGCTGAGTCCGTATGCGGAGATGACGCACGTCT  
ATCTAGATGCGACGGGGTGTGTCTCGGTGGTATCGTTTCC  
TCCGCACTTCTTGGTGCGGTAGCTATCGTACTTCTTTTCC  
TGATGGTGGTAAGCCCGTACAACGTAAAGTTCGCCTTTGT  
ACGGTTGGCGGCGTTTCGAGTGACTACCGCTGCGAGTGGCA  
T

U47286 1-582 TBL18LP CODING

ATGGGCGTAGACCTCACCGGAGTGCAGAAGAAGAAGCGGG  
TGGTGCGCCACCACACCTACTCGACGAACCCGTACATAAA  
GCTCCTCATCAAGCTGTACAAGTTCCTTGGGAAGCGTACC  
AATCCCCATTCATAAACTTATCCACAAGCGTCTGCTGA  
AGAGCCGTAACAACCGTGCGCCATTTCACTCAGCCGCAT  
TGCTGTCTGCATGAGGCGCCGCACCGTGTGGCTTAAGAAG

GGGAAGAAGTCACCAATTGCCGTCATTGTTGGTGACGTGC  
TCGATGATGTTTCGCATGACCCGCATTCCAGCCCTCCGTAT  
CTGCGCCCTCCGCTTCTCGAAGAGCGCCCGCGAGCGCATT  
ACTGGTGCTGGTGGCGAGTGCTTAACCTTCGATCAGCTTG  
CGATGATGGCACCGACGGGGAAAAACACGATGTTGCTCCG  
TGGCCGTAAGTCTGGACGCGAATCAGTGAAACACTTTGGT  
GCTGCAGGTGTTCCCTGGAAGCCACGCGAAACCGCATGTGT  
CGTCACGTGGAAGGAAAGGCAGCGCTCGAGCAAGCGGCG  
TCACGCCTTCCGTCACAAGTAG

U52964 130-1167 AOX CODING

ATGTTTTCGTAACCACGCATCGAGGATCACTGCCGCAGCTG  
CGCCTTGGGTGCTCCGGACGGCTTGCCGCCAGAAGTCTGA  
CGCCAAAACACCTGTGTGGGGACACACTCAACTGAACCGT  
CTCAGTTTTTTGGAAACCGTGCCCTGTCGTTCCCTTTGCGTG  
TTTCCGATGAAAGCAGTGAGGACCGCCCCACCTGGAGCCT  
TCCCGATATTGAGAATGTGGCCATAACGCACAAGAAGCCA  
AACGGTCTCGTTGATACACTCGCCTACCGCAGCGTCCGCA  
CCTGCCGCTGGTTATTTGACACATTCTCTCTCTACCGTTT  
CGGTTCCATCACGGAGAGCAAAGTCATCAGCCGCTGCCTT  
TTTCTTGAAACTGTTGCCGGTGTCCCGGGGATGGTCGGTG  
GAATGTTGCGCCACCTTTCATCATTGCGGTACATGACGCG  
CGACAAGGGTTGGATTAACACTCTTCTTGTTGAAGCAGAG  
AATGAGCGCATGCACCTCATGACGTTTATTGAACTTCGCC  
AGCCAGGGCTCCCCCTACGCGTTTCCATCATTATTACGCA  
AGCCATTATGTACCTCTTCCCTCCTGGTTCGCTATGTGATT  
TCCCCCGTTTTTGTACACCGCTTTGTGCGGTTACCTTGAAG  
AGGAAGCCGTCATTACATACACCGGCGTTATGAGAGCAAT  
TGACGAAGGAAGCTGCCCTACCAAAAATGTATGTTCCCG  
AAGTGGCTCGCGTGTACTGGAACCTCAGCAAAAATGCCAC  
ATTCCGCGACCTCATCAACGTGTATCCGAGCTGACGAAGC  
GGAGCACCGTGTGTTAACCACACATTTGTGACATGCACG  
AAAAACGCCTGCAAAAACAGTGTCAACCCCTTCGTTGTATC  
TGAAGAAGAACCCGGAGGAAATGTACTCCAACCAACCAAG  
TGTAAGACAAGGACGGATTTTGCAAGCGAAGGCGCCAAA  
ACTGCGAGTAATGTAAACAAACAACGTGTAAGAGCTGGCA  
TTACCTTTGATGGAGTTCCGCCTTTCAGAGTGATTTGA

U68270.1 79-612 cypA Coding

ATGTCATACAGGCCCCACCACGCAACTGTACCCACCAATC

CCAAGGTGTACTTTGATGTGAGCATTGCAGGTCAGGCAGC  
CGGCCGCATCACCTTTGAGCTCTTCGCTGACGCCGTACCA  
AAGACGGCGGAGA AACTTCCGTGCGTTATGCACTGGTGAGA  
AGGGCTTCGGGTACGCCGGCAGCGGCTTTCATCGCATCAT  
TCCGCAATTCATGTGCCAAGGTGGTGACTTCACTCGCCAC  
AATGGCACATGCGGCAAGTCCATCTATGGTGAAAAGTTCC  
CCGATGAAAGCTTCGCCGGAAAGGCGGGTAAACACTTCCG  
CGCTGGCACGCTTTCATGGCCAACGCTGGCCCCAACACG  
AACGGTTC CAGTTCTTCATTTGCACGGCTCCC ACTCAGT  
GGCTTGACGGCAAACACGTCGTCTTCGGTCAGGTGCTTGA  
AGGCATGGACGTCGTCAAGGCAATGGAAGCTGTTCGGCTCG  
CAAGGGGGAAGCACAAGCAAGCCCGTCAAGATTGACTCGT  
GCGGCCAACTATAA

U74470 109-1014 RNH1 CODING

ATGGGAAAGAAAAGGTTTTACGCGGTGGCGGTTGGCCGAC  
AAACCGGTGTTTT CAGTACCTGGGAGGAGTGCCAGAAGCA  
GGTCTCAGGGTTCTCTGGAGCCCGTTTTAAGTCTTTTTTTG  
ACTTTACAGGAGGCGCAGGCCTATGCTAGTGGGGTGCAGG  
ACGTTGATCCGGGAAGTGTCGGCACATCACTTGTGGCTGA  
CTCGCACACGCCTGTTTTTGGTGGGTGTAAAGCGCGCGCTT  
TCACTTGATGTGACGTTAGATGCTGTGGAGGTGGATGCTG  
CGGATGACGGTAATGAAGTGGATGACGAAAGTAAGCAGCA  
GGTTCTCTCCCCAGAATGGGTAGAGGCCCGGAAACGGGAG  
GCGGTTGTTGTGTATGTTGATGGGGCCTGCAGAAATAACG  
GAAGTCGAAGCCGTGAAAGACGACCACGTGCTGGCTTCGG  
TGGATTCTATGGCGACGGTGACAGCCGTA ACTTTAAATTC  
CCTCTTCCAGCTCACGAACCC CAGACCAATCAGCGTGC GG  
AACTCTCCGCGCTCATCCATGTCTTGCGCGTTGCGTTGGA  
CTCTCACCCCTTGCTACAATTTGTGTGTATACAGTGATAGC  
AAGTACACCGTAATGGGTGTCAATTCCTACTTGCACCGGT  
GGGAACGCAACGGTTTTAAA ACTGCCGGTGGAGGCGACGT  
TGCTAACATCGACTTGTGGAGTCAATTCACGAAATTGCGT  
AATAGGCACTTATCCCGGTGCGCGGAACGTTTCACTATGG  
AGTTCCGCTTCAAGGCTAGTTTAGCAGCGATAGCTGCACG  
CGCTGTTCGCGTTGCAGTTGAAGCACGTCCCGGGGCACGCA  
GGTGTGTATGGGAATGAAATGGCAGACCGCTTGGCAGTTG  
AGGCCTGTGAATCGCCCTTTGGCTAA

U96712 67-969 PDXK CODING

ATGTCAGAGAAGACGGTTTTATCGATTCAATCATTTGTGA  
CGCATGGCTACGTTCGGGAATAAGGCTGCTACGTTTCCTCT  
GCAGCTGCACGGTTTCGATGTGGACGGTATTAACACCGTT  
TGTCTCTCAAACCACAGTGGGTACCCAGTTATTAGGGGCC  
ACAGAATGAGCTTACAGGAATACGACGAACATAATGGAAGG  
CGTCCGAGCGAATAACTTCCTCAGCAACTATCGCTACATT  
CTGACCGGATATATAAATAATGTTGACATTATTGGGAGAA  
TACGCGACACATTAAAGGAAGTGCGGGAGCTCCGAGAAAA  
GGAAGACAAGAAGTTAACTTTCATTTGTGACCCCGTCATG  
GGCGATGATGGTATCATGTACTGCAAGAAAGAAGTATTGG  
ATGCGTATCGGGAGCTGGTCCCTTTGGCGGATATCGTCAC  
ACCAAATTACTTCGAGGCTTCGTTGTTGAGTGGCGTCACC  
GTCAATGATCTCAGTAGTGCTATACTGGCTGCTGATTGGT  
TCCACAACGTGGTGTGCTCATGTTATCATCAAGTCGTT  
TCGTGAGCAAGAAAATCCAACCTCACCTGCGGTTTTCTGTAC  
TCCGTGAAGGAGGGATCAGAAGCTGCGGTGCGGCGATTTT  
CAGGAGTGGTACCATATCATGAAGGTCGCTACACCGGAAC  
GGGCGACGTTTTTGGCCGCGTGCCTTCTTGCCTTCTCTCAT  
TCTCATCCAATGGATGTGGCGATTGGCAAATCGATGGCTG  
TATTGCAGGAACATCATCGCAACCCGAAAGGAGGGAGG  
TGACGGTAAAAGTTCATTGAAAAGTAGGGAACCTGCGTGTC  
GTTGCATCACCGCAAGTGGTGCTACAACCAAGCACAGTTG  
TTGACGTTAAACCAATTCATGA

X14399.1 442-5676 Trypanosoma brucei Trp11 gene for largest subunit of  
RNA polymerase RNA polymerase I largest subunit (AA 1 - 1744) Coding

ATGTCGGGGATCGCTTTCGTGGAGGTTTCGCACGCGTGCCG  
GCCAGGAGGATCGTTCGGCACCTTGGCGTCCAGTTGTAAG  
AAATGGTGAGAATCACGCCACATTCTACGACACTCGAATG  
GGTAACTTCGACGCTAACCCGTTTCCACCACAGACATGTC  
AAACGTGCGCAGCGAGCTTGACAGGAAAGTACGGCAATGA  
ACGTTGTACGGTCACTTTGGATTTGTTGGAATGCCGCGT  
ATCCGCCAGGCAGTGCGCATTCCGACTCCGATCGCCTTG  
TCGTTTTGAATCCGCACCTCGCGATGGATGCAGATCGTTT  
GTTCCGAGCGAAATGCTTCTTTTGTCAAGTTTCGAGCA  
CCAACATTTGATGTGCAACGATTCCGCCAGGCACTGGTTC  
TGGCCGACCATGGTTTACCAGGAGATGCGCTGCATCTTCT  
CGACACAGTGCCAACAGCGAAGGGTCACGACGCTATGCTG

AACCACAGGCGCATGGCAAATGAGGAAATCGTCAACGATG  
TATCCATCCTTCAGTCGTATGTTGATCGTATCTTAAGGCA  
GCGCGCTAGTGGATGCAGTGAGGAGGATGCGAAAGCAAGA  
GTGACTATGGCACAGAAGGGAAGTGTGGACGTTTCGCAATG  
ACATTTGCAACATGGCGATTAGCCATCTAAGATCATT CAG  
TGGTCCTTGTAGCCACTGCACTGCTATTTCTCCGACCTTC  
TTGAAGCGCGGCGGTATTATTTTCTTTTTTATT CAGGAAAT  
CGAATCTTGTGACAAACATTGCCAAAGGATT CCTTACCCA  
GCAAGAGGTATCTGAGTGGGAGGCTGTCAACCGGCTGCAT  
GGGAGGACTGGAACATATTTTGATGGTCGTCAAATGCTTT  
TTCATATGAAAAACCTATTCGCAAAGAGCAAGCTATCCT  
TGTTTTGCTGTACCCAAATCTTGGTGAACCGTCGGTTTTTC  
ACCAAACCAACAAGGTTGTCCAGCAAGTGAAAGGTACA  
AACTGTTCTTTTTGGACCGTATTCTCGTACCGCCATTACC  
CCTGAGGCTTTCGT CAGGCGTGAGAGTAAATGATAATGGT  
TTGATAATACCCGACGAGCAAACACGTGCTCTTTCCGATA  
TATTGGGGTTTGTGAGCAGATTGAGTGCTTCCACACATT  
GAGTGCTAATTCTACAAACGGGCGTAGTTTCATCACTGAT  
GCGCAGAGGGCTGTGAATGAGTCGAACCTCCGCAACCTTC  
AACAAAAAGTGGATGAGTTTTATGCAGAAATCGTAAATAG  
CTTTGCGAAGAAGGAGGGACTCTTCCGCATGAATATGATG  
GGAAAGCGTGTCAATCAGGCCTGCCGTTCCGGTTATTTCCGC  
CTGATCCATTCGTTGAACCGAACGAAGTGCTTTTTACCAAG  
ACCCTAGCCCGTGCTTTGTTCGTTTCCTGAGCAAGTTACT  
TGTTTTCGCACCAGCTCGCATGAATCTGTTGAAGCACTGCG  
TTGTGAACGGGCCACGTAAATACCCCGGCGCCACACACAT  
TGAGCTTCGTCATGCCAACGGTGAGATCCGTTCTGTTGAC  
CTTAATGTACCCGAGCAGACGCGGCGGCAGCATGCTGCAA  
GGTTTTTTGCGATGGCCCAGAGTGGTGTGACGCTAATCGT  
TTATCGGCACATTCTTAATGGTGATCGCGTTATATTTAAT  
CGCCAACCCACACTCCATAAACCGAGTATGATGGGGTATC  
GCGTGAAGGTACTTTCAGGGTCCAAAACCTATTTCGCTTTCA  
CTACGTGAATGGTAACTCCTTTAACGCAGACTTCGATGGT  
GATGAAATGAACGTTACGTTCCGCAAAGCATTGAGACGC  
GGGCCGAGGTTGAAACGCTGATGGACGCAAACATCAACTA  
CCTTGTGCCGACGTCTGGCAGACCGATCCGTGGTCTTATA  
CAGGATCATGTGGCGGCAGGCGTTTTTGGTAACGTTGCGCG  
ACAAGTTCTTTGATCACTCCACCTTTGTGCAACTGGTGTA



CAATGGCGTCGGTCCATACATTCAGGAAAACGTTGGCATA  
ACTCTTGCTGAACTTATTCCCATTCCAGCAATTCTTATGC  
CTCGGCCAATGTGGACTGGAAAACAGCTGATATCTGTGAT  
GGTTCGGTTTTTCTAGTGGATTGTCTGCCGCAAGCGACTGT  
GGACGGGAGATAGAGGGCGGAATCACACTCAAAGGCACTT  
CACAAATCCAACCCAGCGCATTGACAGAATACCGGCGGG  
TAGCTGCGACGCAGTGCCTGCGAAATCCGGGGCAGTGGTT  
GATTCTACTGTCATGTTTGCGAACAGTGAGCTAATTACCG  
GATTCATGTGTAAGAAGCAGCTTGGAGCCTCTAATATGTC  
TGCTCCCCACCATGTCTATGAGCTTTACGGACCACATAGG  
ACGGGACAGTTGTTGCTGCTTTTGGCCGTGTTCTTCTGC  
TGGCTCTACGAAAGGAGGGTCTTTCCCTTGCGATGGACGA  
TATGTTCCCTCGTTGATGAAGAGCGCCGATGCGACTTGCTT  
AGGAAGCTTGATGATATAGCGTTGGATGTTCCAGATGAAG  
AGGCCACTGCTGCACCGATGATTGCAGATTATGCAACAAA  
GATTCAGCAGGAGTTTGTTCGCGCAGCGCATGCTGGTGCCC  
TTCCCAAAGAATCATCTTCTTCTGATGACTATTTTCAGGTG  
CGAAAGGAAGCAACCTGAACGCCACACAAATGTCACTGCA  
GTTGGGCCAGCAGCTGTTTCGATGGACTGCGCGTGAAGCGT  
ATGAACTCTTCCAAGACGCTTCCGTCCTTCTTCACTAATG  
AAAAGCGTGCCCGGTCTTTGGGTTTGCTATGGGTTCCCTT  
CGCCTCAGGGATCAGACCAGCCGAGTATAACCATTCATGCA  
ATGGCTGGTCGCGACGGCCTTATTGATACCGCTGTGAAAA  
CCTCCCGTTCTGGTCACTTGCAACGCTGCCTCATCAAAGG  
TCTCGAAAGCCTTGTGGTCCATTGGGACCGTACGGTGCGT  
GACTCCAACGGCAGCGTTATCCAATTTATGTATGGGGGTG  
ACGGACTTGACCCGTGCAAGGCTTCTACGCTTACGGCGTG  
GGAGATGATGAAGGATAACGTAGTTGATGTTTCCAAGCGA  
TTCGGAGGAGATGCCTCAGAAAGTGTTGCCGGTGCCGAGG  
ATGGCGCGGCGGCAGGGTTGAAGGAGATGCGAAACGAAGA  
TGAAAGCCCACGACTGAGGCCGTGCAAAATGCGCATATG  
GAGCAGCAACTATCCACGTATCCTCTTCCGGCCTCACTCG  
ACAAGAGTTTGTCTGAGTATCTGTGCAAAAAGCGGATTT  
CCCGCTCTTCCGCAAGGTGTCGACGCTAGCCCGTTGGGAT  
GCGAAACAGCAGCTAAAAGAGAGGTTACAGCAAAGGCGCC  
AGAAGTGGGTTGGTGCCCTTCGAAAAACGCTTGCAGACAT  
TACTGCCCGCAGGCGTCTGTGGGCATTGTGCGAACCCGGT  
GAGCCCGTTGGCCTCCTTGCAGCGCAAGCAGCTGGTGAGC

CGTCAACACAGATGACCCTCAACACATTCCACACTGCTGG  
TTCAACTGTGTCCCACGTGACGGAGGGTATTCCCTCGACTC  
CGCGAGTTACTGATCTACGCCTCCGTTAATAAGGCGGCTG  
TTGTTGTACCCGTTACTAATGCTACAGAGGAAGACGAGAA  
AGTAATCGCCAAAATGCTTCGTGCAGGTGTCGCCGCAAAA  
CTGACCGACTGTCTCGGAAGGTCACAGATGGCGCTGGTG  
GCCAAAGCGCTTCCAGCTCGATGCAGCGGAAC TTAAACAC  
TGGCTTTGGTAAGGGCTACCACTATCACGTTGCGCGAGGC  
CGCACTGGTATGGTGATTACGGTGTCTTTCCTGTTTTCGC  
GCTCGTGT TTTGGAGGAGTTGCGTAAGCGCATGTGTATGTC  
ACCATCTGAACATCGACAATCTTTTACTGAAGCACTAAAG  
AATGTTGTGCGGCTCATCATGAGGTCACTGAGCGCCGTTTC  
CACGCGAGAAGGAAAGCGGTTGACGGTTCAGGGAACACTGG  
AGGGATGAAAGGGGGGAAGTGGGCGCGCCGACAGGAAGAGA  
AAGCGATCAGGCCCGGACGATGGCGGTGGTCCTCTTGGGG  
GTA CT TTTCCGAGACGAAATTATGCGCATTGAAGAGGGAAC  
CGATTCTGATGATGGCATGAGCGAGAGGAGCAGTATAGGT  
GGGGGTCCGGCTGGCTCGGAGGTCTCATCTCTACACTCGG  
ATGGAACCGATAACCAGGGGCATAGCAGGAAGCGATACGGG  
CGGGCCGCAGCGACGGAGGGGCTCTGTTGAAAGTGGCCGC  
GGTGACGATGCTTCTGACAGTGAGGCAGCTGACCCCGACT  
TATATGCCAGACGAAGTGGCTCTCCGGCGAGGGATGCGGA  
GGATGGAGGTGAGATGCAGGATCGGGACGGCACGGATTGG  
GGAGGAACGTCGATGCAAGGTGTGGTGGGATATGACA ACT  
TCCCAGAGATTCACATGAGTTTCACCAAGTCAAATTTCCG  
TGCTGTTATTGCTCCCCTTAGTACTGCTGCAGCGGCCCGA  
GATGGGGTTGTGCAACTACACGAAGACTTTTTTCATAGTTA  
ATGCTGTGCTGCGCACGGCCTCGGACGTCATTGCCGTCAT  
TCCGGACGTTGTGGATAATGCTTTGGAGGCGCAGAGAATG  
CCCTCGTGGTTACCTCAATTCGGGTCCCTCACTTTCACTC  
GACTGAAAGATAAAGGATCTGGCCAGCTTGTTTTCCAAGG  
ACCTGGCTCGACAATGCGGAATGTGATGTCTTTCCTTTCC  
CTTTTCACCGTTGGCATAAAATCGATAAAACTTCACCAAG  
CTTGCTCCACTGATATTCGGGATATGGGAACATACTTCGG  
CATTGAGTCTGGATACGCTGCGCTTACGATGAGCTCAAT  
AACTATTCAACCGCTACAATGTTCGACCCGCGGCACTTGT  
CGCTCATCGCCGATACGTCTACCCACCGAGGGCGATGGGA  
GAACTTCAATTTCACTGGTGT CATATCAACGAGCGCGAGC

CCACTGTTTCAGATGACATTTGCCTCGTCGAAGCGCTGGT  
TGCACAGAGCGGTGAGTCGGGGAATGAGTGACGACCTCGA  
GTCCTTTAGTTCTGCCATCATGGTGGGGGAACGCCCTCGT  
GTGGGAACGGCGTCCGTGCGGCTCTCGACTGATACGGCGA  
TTTTGCGGGATGTGCTCGAGAGGAACTTTGCATAA

X53464.1 58-759 Trypanosoma brucei mRNA for TBS-17. TBS-17 (AA  
1-233) Coding

ATGGGTTGCTCAGGATCGAAGAACGCATCTAACCCCAAGG  
ATGGTGCCGCCAGTAAGGGTGGAAAGGACGGGAAAACCTAC  
TGCGGACCGGAAGGTTGCGTGGGAGCGTATTCGGTGTGCG  
ATTCCCCGTGACAAGGATGCTGAGTCGAAAAGCCGTGCTA  
TTGAACTCTTCAAGCAGTTTGACACGAACGGGACTGGAAA  
ACTCGGCTTCAGGGAGGTGCTTGATGGTTGCTACAGTATA  
CTCAAGTTGGATGAGTTCACGACTCACCTTCCTGACATTG  
TCCAGCGTGCCTTTGACAAAGCGAAGGACCTCGGCAACAA  
GGTAAAGGGCGTGGGTGAAGAGGATCTTGTGGAGTTCCTT  
GAATTCGCGCTGATGCTTTGCTACATCTATGATATCTTTG  
AGTAACTGTAATCTTCGACACCATGGATAAGGATGGAAG  
TTTGTTGCTTGAGCTACACGAGTTCAAGGAAGCCTTGCCG  
AAATTGAAGGAGTGGGGTGTGATATCACTGACGCTACCA  
CTGTGTTTAATGAGATCGACACTAATGGATCTGGTGTGTTG  
GACATTCGATGAATTCATGCTGGGCTGTCACTAAAAG  
TTGCAGGTATCTGGCGATCCTGATGATGAGGAGAACGGAG  
CAAATGAAGGTGACGGGGCAAATGCAGGGGATGGAGTTCC  
TGCGGCTGAGGGTTCTGCCTAG

X56511.1 S51745 362-811 T. brucei genes for calmodulin Coding

ATGGCCGATCAACTCTCCAACGAGCAGATCTCCGAATTCA  
AGGAGGCGTTCTCGCTATTTGACAAGGATGGTGTGATGGTAC  
CATTACGACGAAAGAACTCGGCACCTGTGATGCGGTCACTG  
GGCCAGAACCCACCGAGGCGGAACTCCAGGACATGATCA  
ACGAAGTTGATCAGGATGGAAGCGGAACTATTGACTTTCC  
AGAGTTCCTTGACGCTTATGGCGCGCAAGATGCAGGATTCT  
GATTCCGAGGAAGAAATCAAGGAAGCGTTTCGTGTCTTTG  
ATAAGGATGGCAATGGTTTCATTTCCGCTGCTGAACTCCG  
TCACATCATGACGAACCTCGGTGAAAACTAACAGATGAG  
GAGGTGGACGAGATGATCCGCGAGGCTGACGTTGATGGCG  
ACGGTCAAATCAACTACGAGGAGTTCGTGAAAATGATGAT  
GAGCAAATAG

X56511.2 S51745 1506-2084 *T. brucei* genes EFH5 Coding  
ATGAAGGATAAGGCTCCTGTATCTAGTCAACAGGATCATT  
TCAGTAGGGGCGGTGCCGTGGGAGGCAAGCCCATTTCTGA  
TGTTTCGTGGCACATCTCGTCCCTTCTACCGCAAGCCGGTG  
TCGCACAACACCATCGCGGAGCTAGCGGAAGGTTTTCTGTG  
TACTGAGTAACGGTCAAAAAACAATATCAATCCAATGAA  
GGAGGTCTCTGCGCTTATGGCAAGCGTGGGGCTTACTTGTG  
TCAGACGAAGAGTTCCATGAGGTGATGCGTGTTTTTGGCC  
AAGGGGAACAGACGAACACGGAAGAGCTTAGCTTCAAGGA  
CTTTCTCTCGTTAATGATGTGCGAGGTAGACGATACGATG  
TTGGAGGAGATGCGTGGCGCTTTTCTACATTACGACAAGC  
AAAAGACCGGATTTGTGACAAAGAAACAGTTTACAGAGCT  
TTTCGCCACAGGTGGTGAATGCTCAACCCCTGAGGAAGTA  
GAGGAACCTTCTGACAATTGCGGAGCAAGACGAAACCGATG  
ACAAGATTGACTACAATAGGTTTATCAACGAATTGATTCA  
TCGCCTGAACCTTCATGTAG

X56511.3 S51745 2695-3081 *T. brucei* genes for ubiquitin. Coding  
ATGCAGATCTTCGTGAAAACCCTCACTGGTAAAACCATTG  
CTCTTGAGGTTGAGGCCAGCGACACCATTGAGAACGTAAA  
GGCCAAGATTCAGGACAAGGAGGGTATCCCTCCGGATCAG  
CAGCGGTTGATTTTTGCGGGGAAGCAGTTGGAGGAGGGTC  
GCACGCTTGCGGACTACAACATTCAGAAGGAGTCGACGCT  
GCATCTTGTGCTTCGTCTTCGAGGTGGTGTGATGGAGCCA  
ACGCTTGAGGCACTCGCGAAAAAATACAATTGGGAGAAGA  
AGGTGTGCCGCCGCTGCTACGCCCGTCTGCCCGTACGCGC  
TACGAATTGCCGCAAGAAGGGTTGTGGCCACTGCTCCAAC  
TTGCGCATGAAGAAGAAGCTGCGTTAA

X60951.1 S71823 95-1423 *T. brucei* pol associated gene 1 and pol gene for  
DNA polymerase Coding

ATGTTGAAGATGCGATTATTGATAGTAGTTCCTGTTCTTC  
TAGGACTTGTTTGGCAAATTTTACTTCGTGCTGAATTGGA  
TGGTGTTCCTTTTTTTGGGATGTACATTTTCAGCCAACAAT  
TCCGGGGCTGGCTCATATGTAAGGACCAAGAAAGGAAATG  
CCCTTAAGGAGGGTTTTTTGTTCCCTTACCATGGATGAGGT  
CAGTCAGAACACTGAGGGTATTACAGGCCTTCTTAACAAC  
ATAACGAGTCACCCATACTTTCGGTACTTTAAAGTAAATC  
TGGACAGGGAATGTCGTTACTGGGTGCTGAGGCTAGTTG  
TACATGTGATTCAAATGGATGCCAGATCTGCACTTGTGAT

GACAGTGGAATTCCCGAAACACTAAAATACCCATACGATA  
TGAGTGACGTTTCCGCGGTTGAACGTCTGACGGCCCCTGA  
CAAACATGCAGCAAAAGGTTTTGAGGACGAGATCAAGCCG  
ATCGACCCAGATAGAGATGCAACATATGTGGATCTTCTCC  
AAAACCCAGAGGCAAACACCGGATATTCGGGACCGAAAGC  
AGCGCGGGTTTGGCAGGCTGTATATGACAACTGCAATATT  
GACGGACTTCCAAGTAATGATACGGCTGGTGTAGAAAACA  
GAGAGAAGGCTTTACTTTCGGCAGCTTCTAAGTGGGCTCCA  
CACTTCTATAACCATGCATGTGGCTGCTTTCTTTTACAAT  
GATACGAAGGGTGACTCTCCGCTGCGCAGCCTAGGTGTGC  
TAAATAATCCCAATATATCTTTCTATCCTAACTGTGGCAT  
GTTCCGCCGCATCGTTAAGAATGACGAATTCATAAGGAAC  
CTTTTTGTTGTCTACCAGTTTGTCTTTCGCGCTGTGGCGA  
AGACCAAACGTGCATTTCTTGCTAACTCAAGTTTGTATAA  
CTCTGGCTTCAACGGCGCTGCTACAGATGGAGATGTGCGT  
CTCTACAGCAATATTGGGGA ACTTTTTAGCAGCAAGCTAT  
TCCGCGTAGCAACTTTCGACGAGCAAAAATTTTTTTGAGTC  
TCCAGGTGCGCACCTACTGGTTCGGCAAATGAAGCGCGTG  
GTGCACAATGTTACA ACTCTCATGGATTGCGTCACGTGTG  
AAAAGTGCCGCGCTTGGGGGAAGTTGGAAACAGCTGCTCT  
TGCCACCGCGTTGAAAATTGTCTTTCGGTTCCGCTGAGAAT  
GTGGTGGAACTAAACAGAGGAGAGAGAGTTGCCCTTATAA  
ATTTTGC GCGGCAACTTGCCATTTCTGT TAAAAATGTTG  
TTC ACTAGCTGCTGTGTGCGAAAATTC AATTACACGGCT  
ATGAGTTGA

X60951.2 S71823 1807-5826 pol Coding

ATGGAGGATTGGGTTAGCTGCCGTTCCGAAGAGCAGAAAA  
GATGTGAAGAAAAAGGACAATCTACCTTTGATGAGTCGGA  
AGAGGAGCAGTGGCGCAGGCTGAAGGAAGAGGCTATGATA  
GATTCAGATGATAGTGAGGGTGCTGCTGGTGATGAGGGTG  
CCGTCGTGCTCGCAGAGGCGAAGAGGCGCAAACCGAGAAA  
ATCTGGGAAGGTAATTGCCACTCAGAAGTGCGCGCAGCCG  
CAGAATCAACATAGACACCAGCAAAA ACTGACAAAGTCTT  
TAAGTACATATGATATGGAGAATCTTCTAAAACAATATCG  
CAATATCTCTGCCGAGGAGGAGGACGAAGTGGATGTGGAT  
ATCACAAAGTTTTCTACAAGATGATGGAGTCGACAGCGAAG  
ATGGTGAGGGACCTTCCGTA ACTGCCACCGAGCTTTTTGTC  
CTCTTTAATAAGCGGAAGAAGTGCTGATACTAATAAAA ACT

GAAGAGTTGGCTGACAGTTTTCCGTTGGCAAATCTTAATG  
ACGAGGTTTTTACTTACGAAAATGAAGCAGCTGTCAAGAA  
AACTCCCCGCAACAAGGAGAAACGCACCAATAAGTCTGGC  
GCCAACTATGTGATTAAGGAGACTGTCGTGGAGGAGTTGA  
ACGTCGTCACGGATTTAGCCGAGGTACGTA CTGGGTCTCA  
ACATGCGAGCACTGACTTTTTGAACGGGTGTCCCCCAAG  
GCGTTGTTTTACTGGTTTTGACGCAAAGAACAACCCACA  
CATTGACAGCTCCCGGAACGATACTTCTCTTTGGTAAAGT  
GTGCATGAATGAGGAAGATGAGGAGTTTCGCTCATGCTGC  
GTGAGAATACAACATGTTTCATCGGAACGTCTTTCTCCTTC  
CGAAAGAGGGCTCAACAGATGCTGAGGTCGTCCAGGAAAT  
TAATGCTATTTGCCGTGGTAGTGGCATAGAGGAGCGGCGA  
ATCAAATTTGTTGAGCGGTATTATGCCTTTGAGGAACCGG  
GTGTTCCCTCGGGAAAAAATCGCTGGGGCGAAACTCGTTTA  
CCCGGGCAGATACCCCCGTTTCCAAACAAGGGAGGGTTA  
ACACATGTCCAAGTTGTTCGTCCGGCGCTCTCGCTCTCTCC  
TTGAACTCTTTCTCATAAAGAAGAGACTAATGGGGCCATC  
GTACCTCGAAATTGAGCATCTTGTTACCGCGATGGACCGT  
GTTTCTCACTGTAAAACAGAGTTTTTTGGTGCCCTCGCCTA  
AAGACATAAAAGTTTACAATTCATCAAAGCCACCACCACC  
GTTTACGGTTGCGAGTATCCA ACTTCACGCCCAGCTTGAC  
AGCGATGGGGTGAAAAACGAAGTGATCGCTGCATCGATTG  
CATTGTATGGCGACGTCTCGATTGATGGAGAGAGAAAACC  
TAACATTACGGAGTGTTTCACTGGCGTGCGGCAATTATCA  
CCGGATGCTCCTCTCCATTAGATTTAGAGACTTACTGTT  
TGTCGAAGCGCATGCCTGGAGTGCACCGTTTTTATAACGA  
GAGGGCGCTGCTTACGTGGTTTTGCGGAGACCCTTGCTGCG  
TTGGATCCCGATATTATCGTCGGACACAATATTATCGGAT  
ATACCGTCGAGACTCTCTTAAATCGCTATCAGGAGCTAAA  
CATTGTTTCGCTGGTCTACGATTGGTAGACTTGATGTCAGA  
CGTTTTCCGCGAATACAGGGGAACAATTTCAATCTGGCCA  
TTGAGAAAGAGGCTTGTGTTGGTTCGTCTTGTCGTTGATAC  
CTACCTTCTTGCGAGAGAGTACTATAAAAGCACGAACTAC  
AAGTTGCTTTTCGCTGAGCACGCAGATGGAAATCAAAGGTA  
TTACGGACAACCGGGGCCACTTCGAACCGGGATCAACCGT  
GTTGGTTAAGGACTCAATGATGTCTTCCGAGGCTCTTTGC  
CCTATCCTCTTACAGCTTCTTAATTGTGCTGTTCTTTCTT  
TCAACGTAGCCTCGTTCCTTGACGTCATCCCGCTTACGAA

GAGGCTCACGCTGCTGGCAGGGAACCTTATGGAGCCGAACG  
CTATATGGTGCGCGTTCCGGAGAGGATTGAGTATCTTCTTC  
TACACGCTTTTCACAACCTTGAAGTTTGTAACACCTGACAA  
GAAAAACGTGATTTAAAGAGAGGTTCGGGAAGATGATGAT  
GATGAAGGCAAACGGAAAACAAAGTACCAAGGTGGTATGG  
TTCTCGAACCAAAGAGTGGGCTTTACTCCGAGTACATTCT  
GCTGCTGGACTTCAATTCACTTTATCCTTCGCTGATTCAG  
GAATTC AATGTCTGCTATACTACCATTGACCGCGATGAGA  
ACACTGTATCTGCCGAGGTACCGCCACCCGAGAGCCTTAT  
TTGCCTCTCTTGTAGGGCCGCAGGTTTGCCCTCACCGTGC  
CTACACAAGTGCATTCTACCGAAGGTTATTTCGTGGTCTTG  
TGGACAGCAGGAGGGAGATCAAGCGAATGATGAAGTCAGA  
GAAGGACCCAGGTAATCTCGCTATGCTAGAAATTAGGCAG  
TTGGCTCTGAACTAACGGCAAATAGCATGTACGGATGTC  
TGGGATTTGAATATTCCCGTTTTTATGCACAACCCCTCGC  
TGAGTTGGTCACTCGACAGGGACGTCTTGCCCTTCAAAAC  
ACAGTGGAGTTGATAACCACAAATTTCCCCATCAATCAGAG  
TCATATATGGAGACACAGATTCAGTGATGATACAAACGGG  
AATCAAGGATGACATTGTAAAAGTGCGTAATCTTGGATTC  
GAAATTAAGGCAAAGTCAACCAGAGGTATCAGAGTCTGG  
AGTTGGATATAGATGGGGTTTTCCGGGCGATGTTGCTACT  
TAGGAAAAGAAATATGCTGCGTTGAGCGTCGTGGACTGG  
CAGGGGGAGGGGAAGGTATAACAAGAGGGAGGTGAAAGGAT  
TGGATATGGTGCGAAGGGATTGGTGCCCGCTTTCCCAACA  
TGTATCTGACGCTGTTCTAAAGAGGATATTAATGCTGAA  
GGTGGCGAAGACATACTAGACTTCGTTCATCAAGTACATGA  
AGGGCGTTGCGCAAGATGTTCTGTTCTGGAAACGTCTACCC  
TCTTGAAGAATTTGTTATCTCGAAGAGCTTGACAAAGGAG  
CCGGAGTCATATCATGGCACAGGATATCCCCATGCTGTTG  
TCGCTCTTCGTATGAAACAAAGGAAGGAGGGCGTTTCGCGT  
TGGTGACCTTATTCCGTACGTCATTTGTGAAGGTGATGAG  
CATATCGATGATAAGGCCTACCACATCGATGAAGTGCGAC  
GCTCTGATGGACTCTCTGTTGACGTCGAATGGTATCTGTC  
TTCACAACCTTTATCCTCCAGTGATGCGTTTTGTGCGAGCAT  
ATCCAAGGTTTCGTACCGGAGCAACTTAGTGAAGCAATGT  
GTATTGCAAGTCATATGCGAACGGAACGCGACGTTAAGGA  
GGAAGACACCGCTAACGACTTCTCCCACTGTTCCATTTTC  
AAGAGCCGTGCACTCTCCGAATGTTTTCCAACCTGCTACGG

CATTACAGGTTCAATGCACACATTGCCAGTTGGTTGTCCC  
AGTGGACCCGCACAAATACATAAACGACATGTTTTCCAGT  
CGTGAAAAGCCACCTCCCACCGCACCCCTTTGAGCTTTATG  
TGTGTTTTCAACTGCGGTCGATCCCTCCCCCTTGCGTATCT  
AGCAAATTGTATGACGCAAATGTGTCACACGATAATCCGG  
CAGTTTTATTGTTTCAGGCGGGAATGTTGCCTCGGTCCGTG  
CTCTTCGGGCGCAATTCACGTACCTTCGAGCAATGTTTTGA  
CGTCCCACAGGCTCTTAAGTGCCTCGGCAGTGAAGAAT  
GCACACCGTGTTCTTTCACACTACGTTGCTTAGGAACTGATA  
GGAAACTCTATACACTGGCGGATGTCGAGAGGTTCCCCGA  
CGTAGAGCCTGTGGATCCGTTGCTCGCATGTGCGGAGAGT  
TTTTACCGCAGGATAGACCATCTTTTTTGTAGTCTTGACA  
AGTTGTTTCGATACTCCATGA

X62148 S48809.1 1283-2500 PAG1 Coding

ATGGTCTCTTTGATTATCCTTTTTTCGCTTGACCTTTGCCA  
TCGCGAATAGGGTTTCGCACGCTCATGAAGGTATTAGTGAT  
TGTGTCCTTTTTTTGTACTTACTGGTAGCGCCTCCGCGGAC  
AGTGGCGCACTGAGTTTGAGTGGAGCTGCGGAGGCGCTCT  
GCAATGCGTGAAGAGGCTGAAATCGGTGTATGCCTTCGT  
CCAAGCGAAAATAAGTATGCAACCGAGAAGGTGAGGGAG  
TTTGAGGATATGGTGGAGTTGGTGAGGTAAAGATTGTGA  
GGGTTAGGGGAAATGAAGGGGGAAATGGCAATTGGACCTC  
GTGCACGGGGATCGCGAAGTTTTTTGAAACGTGTGGGGAGT  
AAAGTGAATAGGGTGAAGAGGAGAGAATTGAAGAGGTTGA  
GATATCTTGGATACTCAGCGGTAGGGGCAGCAGGGATAGC  
GGCGGGGAGGTTGGATGAAATGATAAATGTGTGGCGGCGC  
GCGTATTCCAGTGGGAAAGGGGATTTTTTGCCTAGGAAATA  
GCGAGCACCACGCGACGCGGAATCAGTTGTTGAATTGCTA  
TTTAAGTGACTCGGAGAAGGATGAATTTATTTCTTTGGGG  
GATATGCACCGCATGGAAAGGGTGGAGGAAATGAACATGA  
CACGGGAGAGTATGAACGAACTGCTTAGGCTCACTGGTGG  
CGGTGGAAACCCCTTGGAACGCTACGTCCACAGCGCAAAC  
TGCCACCTAACAAACACCCGTCCGGGGGGCGGCTACCTCT  
CCGAAAACAGCACCTCCAGAAGAATACTCTGGGGAGATGG  
AATTATTTCCCTTAAACGAAGTGAAGAGGATTCGTTGGG  
GGGACAGGAAAAACCCGTGCAGAGGTTCTAATACACGATG  
TAACTTGGGAGGAAGACCCCGTTAACAACGTCCCCGTTCT  
TAGAAACGCCTACCGAGAGCTTCGCAAATTTGTGAACTTG



TATGCTTACATCGAAGAGCTGGCGCACGAAACCGGCGCAC  
ACTGGAACCTGGGAATACGCGCAAGCTATTGTGAACACGGG  
CACCCACGGAAATAAAAGCACAGTAGTGGTAGATGAGGAT  
AGTGGGAAGTCATTCGTCGTGCTCGGGAACAGAGAAACGG  
TGCAAGAGGAGAAGCTGTTGGAGGAGATGGCGATATGTGG  
TGTTGGCAGGGCTGACTCTCTCAGGAGGACCCTCGCGTTG  
TTATTTTTATTGTTTTAA

X91142.1 1-1065 *T.brucei* glycosomal NAD-dependent glycerol 3-phosphate

Coding ATGGTCTCCGGTGTGACATATCTGAAGCGCGGTGCGGTGT  
TCGGCAGTGGCGCCTTCGGTACCGCTCTGGCGTGCGTCCT  
TGCAAAGAAGTGTGAGTCTGTGTCCGTATGGCATATGAAC  
GCCAATGAGGCCCGTGTGTGAACCAGAAGCACGAAAACG  
TATATTTCCCTCCCGGTGCACCGCTTCCAGCTAACCTTAC  
CTTCACGGCCGATGCTGAGGAGTGCAGCGAAAGGTGCGGAG  
ATTGTCTCTTCGTCATCCCGACGCAGTTCCTCCGCGGGT  
TCCTCCAGAAGAACAGCCACATCCTCCGCAACCACGTTGT  
TTCCCGCAACGTGCCCGTGGTGATGTGCAGCAAGGGCATC  
GAGCGCTCCTCCCTCCTCTTCCCCGCACAGATCTTGGAGG  
AGTTCCTGCCCAACTATCCAATCGGTGTTATTGCTGGCCC  
TTCATTGCCATTGAAGTTGCTAAGGGAATGCTGACAAAT  
GTTTGCACTGCCGCGGCCGACATCGACATGGCACGAAAGA  
TTCAGAGAATCATGACCACATCCGACGGCTCCTTCCGTTG  
CTGGGCAACCACCGATGTTATCGGATGCGAGATCGCAAGC  
GCCATGAAGAATGTGCTTGCCATTGCCTCAGGTGCACTAA  
AGGGACTTGGAACCTGAGAACAATGCCCGCGCTGCCCTCAT  
CTCTCGTGGTCTTCTCGAAATCCGTGACCTGACCTTGGCA  
CTTGGCGGCACGGGTGAGGCTGTCTTCGGCCTTCCCGGCC  
TCGGTGACTTACTGCTCACCTGCTCTTCAGAACTCTCACG  
TAACTTTACGGTGGGCATGAAGCTCGGCAAAGGCATTTCC  
CTCGAAGAGATCAAGCGCACCCAGCAAGGCCGTTGCTGAGG  
GTGTTGCAACCGCTGAGCCGCTGGAGCGACTCGCCAAGAA  
GCACAACGTGCACCTCCCCATATGCCATGAGGTCTACAAT  
GTGTTGTATGCCAACGGTTGTGCCAAACGCTCGTTCAAGA  
AGCTCAACTCCTGCAAGTTGGCTGATGAGGGGCTCCCAGC  
GCTCCCGCGCACTTCCAAAATGTAA

X99951.1 316-975 *rab7* Coding

ATGAAAGAGGAACCCGCTTACAAGATTATAGTAATTGGTG  
ATGTGGGTGTAGGGAAGAGCAACATCTCATCGCGGTTCTG

TGACAGCATTATTACGATGACATTGTTCCAACGATTGGC  
GTGGACTTCAAGTATTGCCATACCACAACCTTTAGAAAAGC  
ACGCGCGCACCATCTTGCTTCAGATTTGGGATACCTCCGG  
GCAGGATCGTTTTGTTTTCACTCACGACGGCTTACTACCGC  
AACTGTCATGGCGCACTGATTTGCTTTGATCTCACCAATC  
GGAGCTCCTTTGAAGGGATCGACGCGTGGTTTTGAGCGCCT  
GAGGTCCCCTGCCCCGGTACTTCCGCCCCCTCATCCTCGTG  
GGTTGCAAGTTAGACCTGGTGGAGTGCAGTGAACCTCATA  
AAGAAGGGACAAGCTTAGGGATTTGCAGGCAAGTGGAGAA  
AAGCGAGGCAGACGCATGGGCAAAGCGACACGGTTGCTTG  
TGCTACTTCGAGACGAGCTCGAGAAAATAACACAAATGTCT  
CCGAAGCTTTCCAACACCTGGGGACTTATATAGTGAATAA  
CACAACCTCCAACGTGTCGAGGGTTCATGGGGACAAGGCGATA  
GGGAACATCGTACGATTAACACAAGTACACATACTAAAA  
AGAGGAAGTGGAGGTGCTGA

Y12638.1 165-7376 p277 Coding

ATGAAGTCTGGTGGTGGAAATTTCCCTGACGGAGGATGGCT  
TTGAGCATCAGTATAACGGTGAGGGAGTCACTGAGAAGTG  
GTCATCCGGTCACCGTAGGCAGATTGCGGAGTGGCGAAAC  
CTCAACACAAAACGGTATGGGTACCGTGCGACATAACCAGG  
AAGCCGTTGCTCAAAAGGATGAAGTACCCCCGGAGTACTT  
GCGTAAACTGGTGAAGGATAACGGTGATTTAAGTGGTAAA  
CGCTTCAATGCCGAGCGGAAGCTGTGTGTCGCTTTGCTGA  
GGTACATGCCTCTGGCATTGTACAAACTGCTAGAAAACAT  
GCCAATGCCGTGGGAAGAGGCTCGATACGTCAACGTCGTG  
TATCACATGAGAGGTGTGCTTACGCTTGTTGAGGACACGC  
CAACGGCAGCCGAGCCACTCTACCTAGCTCAGTGGGGCTC  
GATATGGACTAAAATGCGTTCACACAAAGTTGAACTGCAG  
CAGGAATGTGGTACTTTTCGTGCGGGTGATAAGCAAAGGCA  
ACGAGAATGAACCTCCAATAGACTTCAGTGACTACATTAT  
GGACAGGGAGCCGCCACCGGCATTGTACGACGATCTGGAC  
GAGGAAGATGCTGCGGCGGTGCTGGACTGGTTCTACGACC  
CCTTTCCACGGCTTGTCCACCCAAACCAAATTCGCGGGTC  
CCGGCGTCCCAATGGTTACTATTTTACCATCGATGTGATA  
GAAACCCTGTTCCGGAACGCTATTCCCATTCTTCCCAATT  
TGGACGACCGGAATTATTATTATCTGTGGGACTTGAAGTC  
ATTTTACGCGGCAAAGGCGATGCATATAGCGATTCCTAGG  
GCACCCAAATTTGAGGCACCCTCGACGATACAAGAAGAAG

AAGGTGAATGGACAGAATTTAACGATCTTCGGCGTGTTAT  
CCACCGGGATGATCCTCGGAAACCGCGCTTCACTATGCTT  
ACTGAGCGGCAAATCGCATTCCCTTTTTTTGTATAGTGATG  
TGGTGGATGGAGTAACTGTTGCACCCCTATCGCTACCCGGC  
GCAGATACGTGTGGAGAATGAGGACCCCGCCGTTCCGTGC  
TTCTCCTGGAATCCTTCCCTCAATCCTATTAAGGCAATAC  
AAAAGAGGCATTCAGATCCTGTGGGGTCATCCTCGGTAGC  
CTTATGCTCAGCCGCGTTGCGAAAGTCCCAGTGGCTCGGG  
GATGAAGAACCCGAGGACGGGTGCCAACCCATGAGTCTGA  
TGAAAACCTTCTCCCCCTTTTCCAGGAGCTTCCGTTGGA  
GAATGTTGACACGAAGTCTGCCATGTTGCTGGCGTTTGCA  
CCTGGGCCGTTTAAACGAATTCGAAGGTGGTATGAAGCGTC  
GCGTGGACATTCCTGTGGCGGAACACTGGTGCCGGGATCC  
CCCATCCCTACTTACAAATGATACGCGGGATAAAATTTTA  
AGGAGCTATACACAACCTGTTGAAGCACCATGTTGCCAAAA  
ACCTCAGGCGGGACCGACAGAAGGAGCGACCTAAAGAAGA  
AGGTGGTAACCAAGATGAGGGGGGACAACCGGTTTCGACGT  
TTGGACGAGTTAGCAAATTTGGATTTCTTTTCACAAAACCA  
AAATTGATTGGCTGGAAGCTGGTCTCCAGGTTATGCGGCA  
AGGCCACAACATGTTGGTGCAGCTTATTAATGTTAAAAGC  
CTCCCGTATGTTACATAAACTACAACCTTTGAGGCAAAAC  
CAACGCGGACACTGACGACTAAAGAGATTAAAAAAAGCCG  
CTTAGGGCCTGCGTTTACCTCATCCGTGAGCTTCTGGGT  
TTTATGAAACAACCTTATTGACATGCATACTATGTACCGAC  
TGGGGAAAAATGATTCTATTCAACTCGCCGATGCAATTCA  
GTACCTTTTTTTCACATTTGGGTGCGTCTCACAGGCGTGTAC  
AGGTATAAACTTCGGGCAATGAGGCAAATCAAGAGATCGC  
GGGACTTAAAACACGTTCTGTACAGCAAGTTTAAACGTCGG  
TGAGGTGCTTCGAGGCCCGGGATGTGGGTCTGGGGCGCCA  
TCATGGAGGGTGTGGGTTTTTTTTCTTCGTGGAATGACAC  
CTCTGCTGCAAAGGTATCTTGGGAACCTAACTGATCGCGT  
ACTCCGGGGTTCGTGAGGCTAAGGGAAAACATGATGGGAAG  
CGCATCACCCGCCAACGCGTGGAGACAGATAAGGATGTGA  
ATATAAAGGAGGCGTTCCGGCGGGAGCTGCGGGAGATGCT  
CCCACCAGACGTGCGAACGGAAGTAATCCGTACAATGGAT  
CAGCACATGAATGAAGCCTTCCGTCACTGGCGTGCCGGGC  
TCCGCTGGTCCGTACCAGGACTGGCAAAGCCTCTTACGGA  
TTTGGTGAACAATAACGTGAAACTCCGGGCAGAAGAATAC

GTTTCGCGTCACACAGTATCAACGGAAGCGGATAAATGAAG  
GTGACACAGTGGATAAGCAGGCTTTCATGAAGAACCTTGG  
GCGCCTCACGCGTTTGAAGCTCATGGACGAGCAGAATCGC  
CAACGGTCCATACATGGAGGGAACGGACACGGATATTATAA  
CCCCTGAGCAAGCGACGGAGATTTATCGCATGATGGCTAA  
CTGGCTTAGCGACCGCGGCTTCAAGAAAATCAGCTTCCCT  
AAAGCGTTCGAGACCTGCTGAACTACGCCTTCTGGAGCTCG  
CGCTGAATCGTCTTTCGTGACCAACACAATATCGCAAACCG  
TCTTACTCAGGCACAGCGGGAGGAACAAGCCCGAATTGAG  
GAGGCATTTAATTCGCCCATGAAACACTTTCGAAGATAG  
TGGACTGCCTTGCCCGCGTTCGCAGGTTTAAGAACGTCGA  
GGTGGAGTACATGGATACTTTTTTCGAGTCTGTACCCCATC  
TATAACGTTGTTCCCTCCGAGAAGCTCGTGGACTCCTTTC  
TGGACCAGTACCTGTGGTACGAAGCTATGGACCAGCAGCG  
GCTGTTTCCTAATTGGGTGAAGCCATCTGATGTGGAACCG  
GTGCCAATTCTCGTCTACAAATGGTGTCAAGGTATCAACG  
ACAGCCCTGGTATTTGGGATTTTGATCGGGATGAGTCTGT  
CGTGCTGTTACACGCAAAATTGGAGGATGATTTTTACGGA  
AACATTGATTGGAACCTGTTCCGGCCTCTACTGGAGCTTA  
TAATGGATAAGTCATTGGCGGAATACATCGTCAGTCGCCA  
TGATGTTGTAGTGGAGTTTAAGGATATGGCTTATCATTGT  
CGCAAGGGGATGTTACGAGGTTTTATGTTTTTCATCGTTTT  
TGGCTCAGTATTGGGGTCTTGTTCATTGACGTGCTTCTACT  
CGGTACACAAAGAAGCCAAGAAATTGCTGGACCGGCGAGG  
CGCCCCAATCCGTTTATGTCGTGGATGCGAGATCCCTTAC  
TCGCCACATCTCACCTATTCGTGGATACTGTCGTTACAA  
GAATGAAGTATATGTGCTGTTAAAATACACCAAGGTTGAG  
GCTGATGATGTGCGACACCGGTACCTAGAAGAACTAAAA  
ATGACCCCCAGAAGCGTGCCGAAAACGCTTCCGTTTATGG  
TTTCAAGAACTTCAAGCAGTGGCCGCGGGACGCTCGGATG  
CGTCTCTTCCCTAATGATGTGAATCTCGCACGAGCAGTTA  
TATGGGAGTTCGGTGGCCGGCTACCACCGGGCATTGCAGA  
TATTAATGAATCTAATGCTCTAGCAAGCGTCTATTCAAAA  
GACAATCCGAATTTGTTGTTTGATATGGGAGGGTTCTCTG  
TACGCATTCTGCCCGTGGTCCGTACCGAAGATGAGGTGCT  
AGAGAACGAATCCACGTGGAACCTACAGAATACTACGACG  
AGAGATGTCACGGCGCGTGCTTTCCTTCAGGTATCTCCAG  
ATGATGTCAATAACATACGTAACAAGGCGCGACGGGCCAT

TATGATGGTTGGAAGTTCAACGTTTCAAAGCATTGCGGCG  
AAGTGGAATGCACTCGTCACAGAAATTGTTCCATACTACC  
GTGAGGCTATACTGGGAACAGACTCCCTTCAACAGGTCCT  
AGCTCGCGCTGAACATCGAATGCAATCGAGAATTATGATG  
GCTCTTAACTCCCGAGCAAAGGCTCGCTTCCCACCGGTCA  
TATTTTACGCACCTACTGACCTCGGTGGACTTGGTATGTT  
ATCTGTGGGCCATTTCGCTGATTCCTGCACGTGACCTCGTC  
TACTCCAAGTCAACAAGTACGGGTGTGCAATTCTTCTATT  
CAGGACTTACAAACGCCGACAACATTCCTATTCCCAATAT  
TTTGCAGTACTATAACCCGTGGGAAACGGAGGTACGGGAG  
AGCGTTAAGGCGTGGACAGAGTTCAACATGCGGGATCGTG  
AAGCCAAAGCTGCCGGAACGCGGCTCTCAATTGACGATAT  
AGAGCATATCATCAACAAGGCGTCCCGCGAATTCGGGTT  
TTGTTTTTCGCGTCACGCAAAGCTTTTCCAGTTTGACAAAG  
GATTTTCGGTGTTCGTATGGAGTTCCAACGTTACCTTGCAGG  
GAAGTACTTGAAGAATTGGTGGTTCCACCAAGAGCACGAT  
GGCAACATTTGTGGGGGTGTACTGGAGAGGTATCGTGTCG  
ACACAAACATCGCACTTGGTGGTGTGGAGGCCATTCTTGA  
GCATAGTCTATTTAGGGGGACGGGTTTCCCATCCTGGGAG  
GGTATTGAGTTTAACCGCGCTGGAGGTTTTGAAAACCTCCA  
AAAAGGATAGCAAGTTGGCCAAACAGCAGCGTGCCGGTTT  
GGCAAATGTTCCCTAACAGGCGCTTTGCGCTGTGGTGGTGT  
CCGACAATCAATAGGTCGGACGTCCAAGCCGGGTTTGAGA  
CGAAAATTGATACCACCGGAGTGTTTATGTGCGGCAAGCT  
TGAAACGATTAAGAAGTCGCTCATTAAGATTTTCAGTGGT  
TCCCTATGGGAAAAGTGTCATGGGGCAGTAGTGAATGACA  
TCGCAAGCAAGTTGAAGGACATGATGGTGGAAATTAGATGC  
GGCATCCGTCACATTGCAGCAGCAGCACCCGCAAAAATCT  
TACACGTACACAAGTTCTGCACCCGACATTGTCATGGCGT  
CAACGTCACGCTGGCCTGTTACATCGAAGCCGACGGTTCT  
TTCTGACGAAACTGGTGACGAATATAGGGCTCACACGACA  
AGCAAGTACTGGATTGACGTCCAACCTGCGTTGGGGTAATT  
ACGACAGTCACAATATCGCGGAGTATAACAAGAAGTAGATT  
TTACGAATATTCTTCTGCCAAAATGTATCCTTTCCCTGCT  
GGTATTGTCGTGGCCATCGATTTAGCCTACAACCTGTCATT  
CAGCATTTCGGTTATTGGGTACCTCGACTCAAACCGCTGAT  
GATGAACTTATGACAGCCATTATACGACACAATATAGCA  
CTCAATACTCTGCGTGAGCGTATGAAGCGCGACCTTCAGC

TTTTTAGCTCGGCCCAACGGAGGCCGGGTTGTCCGGTGAC  
AAACATTGCGGAGTTATTCTCGGAAGGAATGCGCACTTGG  
ATCGTTGATGACAGCGCTACATATGTCACAAGTGAACAAC  
CCACTGCTGAGGGTGGCAGGAAGTTTAGGTCTGAAAATGG  
TGCCGTACTIONTTTTTGAACCGGCAACAGGGAACCTGAAA  
CTCAGCATTGTTTACAAAAGTGTTTTTGGCTGGTCAGAAGC  
GGCGCACAAAGCTTGCTCGTGAGAAGGCAGCAGAGGAGAT  
TGCTCCTGGCTACGCAGTGTGCCCGCAGTCAGCGACCC  
GGGAAACTCATCGTGACTCGAAGTCGTTTTCCGACAAACTC  
TCCACAATATGCTTATACTGGATTACCCAAACATAATTAT  
TGGACAGAGTGATCTAAACCTTGCGGTCCCAATGGTCCTG  
CGGCACAGTCGCTTGGCCGATCTGCGGATTTCCGGCCACGG  
AAAGTAAGGGGTGGGAATTCTGCCTTTATGATGACTGGCT  
GCGGCAGTTTCAACCTGCAACATGCTTTAATTTACTAAAT  
CTCATACTGCGTGGATAACACGTGAATCTCAGTCGCACGC  
GGCAGACGCTCGAGCCAGACCTTCATGTAGAAGTCCACCA  
CTCACATTTTTTGGCCCACCTACACTCGGGAGGAGTGGGAG  
GCTGTGTCTGTGCGTCTGCAGGAGATGATAATTGCCGACG  
CGGCCCGTCGGATGAATGTCAGTCCGAACCAGTTCACCGA  
GATGGAAAAAAGGACATTCTTCTTGGCAAGAAGATGACC  
ACGGTTGAGATTCAAGAGGAAGAGATGAAGGAATTGGAGG  
AGATGAAGCGCACTAAGTTGGTGCAAGAACACACAATTGA  
TGTGGTAACGAAGTCGGGCGAAACAGCTAAAAAGAGGGTC  
AAAGCGGCATTTCGACTTCGGTAATTCGACATCCGCGAGCA  
ACTGGCGGGCACGCTCACTTGCTAATGCTACTGTGTTCCG  
TGAAGGTACCCTGTTGAGATTGATCACTCTGGTGTGACG  
GGAAGCAGCGACCAACTTATATTTCCCTCAGGAGCTGTTGA  
AAATTTTTGTTTCCGTGCTTTGATGTTCAAGCCCAGTTCTG  
TGCGTACCTTTTTTGGGCAGACTCTTCCCTGATTCCCCCAAT  
GTTAAGGAGGTGTTGTGCATTATGGTGCCCCCTCAAAGA  
GTTCTGCTGTTGAGTACACGACACCGTCATGTATTCCCTCA  
TGACCACCCCATCTTGACCGAGAATCATCTTTCCCTTCTT  
GGTGTCCTTCGTTGCAGTGGCGGGGAACCTTCAATTCCT  
CCAGAGATGTTGCCATCCACGGCAGACTACTGGCGTGCAA  
TGAGGGGCTGCAAACGGAGGGACTCACAACAGTTGTGTCGTC  
GGGGTTTTCGCAGGATGGGATTGGTATCCGCTGTTACACTA  
CCACGCGTGAGGGAATATCGTGGGCTCTCGAAGAATATTC  
CCATGCACTTCAACGCGAGCCCACGGAAGTGCCACCGTTG

CATGTAATTCCGGCTCGTGTGACACTGTGACGGAGCTTC  
AGGGCTTTTTTCTTGTACCAACAGACAATGGATGGAATCA  
TACCTTCAGAGGGGCAACGTGGCGTGAAGACACGACGTTT  
GATGTGCGTGTGGACACTCCACAATTTTTCTTTTTTGCAA  
CACACCGTCCAGACCACTTTCTGAATTTTGCCCGATTAAC  
GGAAGAAGAAGCAACAATTGATATGGCAGATCTTGAGAAC  
CTGATGGCGTAG
